# Supplementary material for: Proteomic analysis of young and old mouse hematopoietic stem cells and their progenitors reveals post-transcriptional regulation in stem cells
Source: eLife. 2020 Nov 25;9:e62210. doi: 10.7554/eLife.62210 (PMC7688314; doi:10.7554/eLife.62210)
Supplement: Supplementary file 1. — (1) Mass spectrometry individual runs for all cell types. (2) Mass spectrometry runs combined by cell type. (3) Contributions to the first two components of Principal Component Analysis (PCA) for young adult mass spectrometry data. (4) Proteins uniquely detected in select subsets of cell types. (5) Comparison of mass spectrometry data to data published by Cabezas-Wallscheid et al. (6) Contributions to the first two components of PCA for young and old adult mass spectrometry data. (7) Proteins either detected in old HSCs but not in young adult HSCs or within the top 2.5% of old/young fold-change in HSCs. (8) RNA-sequencing individual and combined runs for HSCs and MPPs. (9) Proteins uniquely decoupled from mRNA levels in HSCs compared to MPPs. (10) Number of overlaps between each miRNA’s predicted target list with the list of proteins uniquely absent by protein but present by mRNA in HSCs compared to MPPs. [file elife-62210-supp1.xlsx]

## Sheet: Table 1 Individual Runs
	HSC 1	HSC 2	HSC 3	HSC 4	HSC 5	HSC 6	MPPa 1	MPPa 2	MPPa 3	MPPa 4	MPPa 5	MPPa 6	MPPb 1	MPPb 2	MPPb 3	MPPb 4	MPPb 5	MPPb 6	MPPc 1	MPPc 2	MPPc 3	MPPc 4	MPPc 5	MPPc 6	CLP 1	CLP 2	CLP 3	CLP 4	CLP 5	CLP 6	CMP 1	CMP 2	CMP 3	CMP 4	CMP 5	CMP 6	MEP 1	MEP 2	MEP 3	MEP 4	MEP 5	MEP 6	GMP 1	GMP 2	GMP 3	GMP 4	GMP 5	GMP 6	Old HSC 1
2020-03-02	50.4866	0	0	0	95.4587	176.715	78.4027	76.5351	108.585	214.428	132.627	220.856	35.0893	46.2245	110.745	116.048	143.394	100.453	140.237	0	299.433	214.183	170.812	153.507	0	0	83.267	101.108	152.417	34.7027	140.592	123.736	29.4518	116.38	132.451	161.311	142.318	98.9083	0	0	108.813	79.9754	180.204	33.6798	121.998	83.035	64.423	107.313	0
2020-03-05	0	0	0	0	0	0	0	0	0	0	12.1885	12.3178	6.55623	0	0	0	14.4711	33.4573	66.631	0	15.4662	43.0219	16.9769	27.5725	0	0	0	0	0	0	22.1496	35.5767	0	47.1056	30.6499	21.2794	0	0	0	0	31.068	22.2742	2.21002	17.3834	11.3617	44.7151	107.475	6.8409	0
2020-09-01	171.316	118.697	323.914	163.134	219.062	325.717	389.374	390.641	421.747	402.453	358.32	293.144	301.596	333.98	404.876	417.207	367.694	369.629	461.065	473.507	619.425	494.891	455.525	477.49	480.494	482.674	481.947	443.186	357.38	359.354	298.484	233.44	300.468	255.759	282.941	207.657	0	0	51.2909	0	74.5566	86.6776	47.9849	176.008	150.855	109.971	27.4769	94.9184	259.06
2020-09-02	222.628	361.964	433.922	464.961	477.222	460.032	379.356	247.736	282.727	302.305	369.563	370.043	315.309	324.677	318.311	270.473	302.817	274.589	236.303	262.512	271.63	84.614	295.338	293.462	260.819	253.864	290.209	292.89	342.321	291.914	319.748	289.186	413.933	246.876	322.392	300.286	270.03	267.606	416.391	389.141	291.823	313.012	385.646	378.548	285.254	254.861	551.164	276.642	410.584
2020-09-03	0	0	0	0	0	0	0	0	0	0	0	0	12.7437	21.6373	0	0	0	0	0	0	0	0	0	0	0	0	0	0	0	0	0	0	0	0	0	0	0	0	63.6341	0	0	0	0	20.6814	0	0	0	0	0
2020-09-05	0	0	0	0	0	0	0	0	0	0	0	0	0	0	0	0	0	0	0	0	0	0	0	0	0	0	0	0	0	0	0	0	0	0	0	0	0	0	0	0	0	0	0	0	0	0	0	0	0
2020-09-06	435.77	391.573	403.798	980.052	412.147	615.907	432.703	462.947	351.908	463.673	503.569	469.591	572.015	493.898	434.341	330.511	451.108	459.376	413.131	424.608	509.74	390.841	396.831	433.619	631.517	689.653	562.65	495.612	487.885	594.548	510.986	428.976	491.067	371.35	288.408	351.47	235.081	160.811	334.961	200.605	192.155	142.177	110.65	160.46	213.21	194.813	216.908	320.639	748.259
2020-09-07	250.19	495.856	499.749	485.943	550.209	522.43	610.996	668.643	548.6	508.682	332.961	496.8	560.019	376.722	352.676	352.322	286.662	335.252	340.726	551.623	434.116	447.471	350.912	316.721	856.06	442.789	236.156	379.264	566.126	542.408	480.978	390.164	396.187	320.574	452.529	440.172	474.332	474.027	618.426	486.246	344.429	313.764	274.152	293.134	239.469	366.97	273.32	271.231	487.049
2020-09-08	133.844	372.18	0	0	110.184	114.014	0	0	82.735	137.843	133.336	110.695	68.6345	0	43.8067	31.5212	29.4817	71.1528	0	0	0	100.438	10.137	25.696	0	0	0	0	0	0	53.8775	74.3544	103.07	56.2739	22.0904	16.0328	245.725	163.283	338.841	452.258	177.116	148.011	0	0	0	0	20.1475	6.87525	127.902
2020-09-11	0	0	0	0	89.767	156.161	91.9482	27.5086	132.494	137.067	120.819	123.118	164.074	33.9377	196.975	122.478	138.668	132.992	34.61	82.9586	215.173	273.957	101.621	112.947	236.715	137.982	196.452	165.356	223.733	197.172	169.16	93.4554	294.977	70.7552	260.532	120.074	29.8759	146.897	185.862	225.295	201.141	145.673	225.844	238.757	191.992	256.112	294.518	159.348	104.917
0610007P14Rik	0	0	0	0	0	0	0	0	0	0	0	0	0	0	0	0	0	0	0	0	0	0	0	0	0	0	0	0	0	0	0	0	0	0	0	0	0	0	0	0	0	0	0	0	0	0	0	0	0
0610010K14Rik	403.177	236.304	98.1211	235.51	91.171	127.959	164.144	164.423	112.078	67.9483	87.8548	101.793	247.296	315.905	81.1873	67.6181	137.196	119.28	179.121	208.845	37.6416	49.8189	110.531	99.636	202.129	276.237	126.499	119.502	59.2003	94.1353	102.505	239.13	171.459	209.961	94.7528	77.3266	122.474	116.2	173.546	49.728	51.2535	72.7369	99.2031	137.237	103.677	120.846	85.239	95.7181	243.145
1110001J03Rik	0	0	0	0	0	0	0	0	0	0	0	0	0	0	0	0	0	0	0	0	0	0	0	0	0	0	0	0	0	0	0	0	0	0	5.29384	0	0	0	0	0	26.1225	7.88184	0	0	11.419	0	0	11.0629	0
1110004E09Rik	0	0	0	0	0	0	0	0	0	0	0	19.6565	0	0	25.8697	44.0515	0	0	0	0	28.8079	0	0	0	0	0	0	0	0	0	0	0	0	0	0	0	0	0	0	0	0	0	17.728	0	0	0	0	0	0
1110004F10Rik	276.585	0	0	0	0	0	0	32.8994	0	0	126.538	128.512	154.549	210.455	70.9394	57.8652	65.664	77.3131	123.745	20.0518	0	0	119.349	136.227	32.23	158.81	68.1088	112.67	0	0	105.179	152.353	58.1214	135.969	171.062	91.5865	23.2097	27.1633	0	43.0824	78.5569	89.5286	13.4176	92.3135	46.7686	15.6265	18.0877	31.7092	136.729
1110008L16Rik	0	0	0	0	0	0	0	0	0	0	16.9617	41.3179	0	0	0	0	14.4748	22.2766	0	0	0	0	27.4424	20.4194	0	0	0	5.01379	0	0	0	0	0	0	10.4279	50.2892	0	0	0	0	94.4005	111.139	0	0	0	0	0	46.0547	0
1110012L19Rik	0	0	0	0	0	0	0	0	0	0	0	0	0	0	0	0	0	0	0	0	16.6298	22.324	0	0	0	0	0	0	0	0	0	0	0	0	0	0	0	0	0	0	0	0	0	0	0	0	0	0	0
1110038F14Rik	0	0	0	0	0	0	0	0	0	0	19.9531	22.2622	23.4053	0	22.227	31.2592	0	0	0	0	27.8375	49.2076	0	0	21.5703	12.6202	0	0	0	0	30.8503	15.2	33.7265	29.3067	15.5721	12.0176	82.0283	61.8011	35.6465	40.3339	0	36.7337	0	16.7257	17.4312	22.8848	16.1263	15.4197	0
1110059E24Rik	0	0	0	0	0	0	0	0	0	0	0	5.11454	0	0	85.4803	0	0	0	0	0	77.2722	0	0	6.70646	0	0	0	15.6431	0	0	0	0	0	0	0	0	0	0	0	0	0	0	0	0	0	0	0	0	0
1110065P20Rik	0	0	0	0	0	0	0	0	0	0	0	0	0	0	0	0	0	0	0	0	0	0	6.52254	0	0	0	0	0	0	0	0	0	0	0	0	0	0	0	0	0	0	0	0	0	0	0	0	17.3673	0
1190007I07Rik	0	0	0	0	0	0	0	0	0	0	0	0	0	0	0	0	0	0	0	0	0	0	0	0	0	0	0	0	18.2584	0	0	0	0	0	23.9602	14.1515	0	0	0	0	19.5937	12.7503	0	0	0	0	0	23.0489	0
1300017J02Rik	0	0	0	0	16.2317	0	0	0	0	0	0	0	0	0	0	0	0	0	0	0	0	0	0	0	0	0	0	0	0	0	0	0	0	0	0	0	0	0	0	0	0	0	0	0	0	0	0	0	0
1600014C10Rik	0	0	0	0	0	0	0	0	0	0	0	0	0	0	0	0	0	0	0	0	0	0	0	4.02012	0	0	0	0	0	0	0	0	0	15.8843	0	0	0	0	0	0	0	0	58.9044	0	0	0	0	0	0
1700008O03Rik	0	0	0	0	0	0	0	0	0	0	0	0	0	0	0	272.265	0	0	379.784	0	0	0	0	0	0	0	0	0	0	0	0	337.112	0	0	0	0	0	0	0	0	0	0	0	73.2762	0	147.369	0	0	263.375
1700020D05Rik	0	0	0	0	0	0	0	0	0	0	20.965	0	0	0	0	0	0	0	0	0	0	0	0	0	0	0	0	0	0	0	0	0	26.972	0	17.0325	34.5425	0	0	0	201.752	0	0	0	27.1934	33.7151	0	0	0	0
1700025G04Rik	0	0	0	0	0	0	0	0	0	0	0	0	0	0	0	0	0	0	0	0	0	0	0	0	0	0	0	0	0	0	0	0	0	0	0	0	0	0	0	0	0	0	0	0	0	0	0	0	0
1700066M21Rik	0	0	0	0	0	0	0	0	0	0	0	0	0	0	0	0	0	0	0	0	0	0	0	0	0	0	0	0	0	0	0	0	0	0	0	0	0	0	0	0	0	0	0	0	0	0	0	5.97524	0
1700112E06Rik	0	0	34.8372	0	0	0	0	0	0	0	14.7102	0	14.9296	0	31.9617	0	21.5511	0	0	0	0	0	17.0831	24.9896	0	0	0	0	0	0	0	0	0	0	10.3366	15.8071	0	0	0	0	0	0	0	0	0	0	13.492	41.8138	0
1810009N02Rik	16.0777	0	0	0	0	0	0	0	0	0	0	0	36.8158	36.552	0	0	0	0	0	0	0	0	0	0	0	0	0	0	0	0	0	0	0	0	0	0	0	0	0	0	0	0	0	0	0	0	0	0	0
1810026J23Rik	37.8438	70.1947	0	84.9575	71.4307	30.0816	67.0237	44.4242	61.0797	80.7215	53.79	79.31	70.8484	0	33.8922	20.5129	52.2029	32.1618	24.0541	55.3241	24.302	0	64.0233	51.7031	36.0199	26.7152	55.9971	47.4775	76.0976	74.8042	41.6012	84.6985	21.8552	88.271	66.0556	97.0906	86.5282	128.053	98.0887	25.6674	67.7119	48.3832	121.922	23.8631	16.353	32.8038	0	9.11264	0
1810037I17Rik	0	0	0	0	0	0	0	0	0	0	0	0	0	0	0	0	0	0	0	0	0	0	0	0	0	0	0	0	0	0	0	0	0	0	30.3083	26.6292	0	0	0	0	0	0	0	0	0	0	0	24.6646	0
2010107G23Rik	0	0	0	0	20.9427	0	0	0	0	0	7.14678	0	0	0	0	0	0	0	0	0	0	0	0	0	0	0	0	0	0	0	0	0	0	0	0	0	0	0	0	0	0	0	0	0	0	0	0	0	0
2200002J24Rik	0	0	0	0	0	0	0	0	0	0	0	0	0	0	0	0	0	0	53.2403	0	0	0	0	0	0	0	0	0	0	0	0	0	0	0	0	0	0	0	0	0	0	0	0	0	0	0	0	0	0
2210010C04Rik	28.9186	0	0	0	91.2091	26.3187	0	0	0	0	33.2066	32.9565	0	0	0	0	43.7203	26.9624	0	0	0	0	17.5098	31.3632	0	0	41.7836	78.2357	42.7301	140.301	0	0	0	0	52.4383	41.278	0	0	0	0	49.9209	14.3269	0	0	0	0	0	16.637	0
2210016F16Rik	39.1695	0	18.8459	169.623	105.681	93.5477	38.1705	33.1731	41.5898	44.7393	45.0668	69.3475	18.2914	32.5392	46.8273	15.3648	46.8669	43.0624	33.5785	24.0782	67.8744	0	45.7449	46.5546	0	0	62.349	61.7502	60.6308	11.1282	15.5076	12.2287	116.164	14.92	40.639	24.4838	41.0187	42.0608	0	59.0049	60.28	41.028	48.3802	0	0	15.4155	7.69094	66.4099	0
2210016L21Rik	45.691	0	0	0	0	0	0	0	0	0	8.52294	4.47745	46.4403	51.2272	59.598	37.492	0	0	58.3582	0	41.0091	66.5174	0	15.2575	190.282	242.106	33.5155	0	89.6334	42.0475	56.4973	59.7261	176.808	49.58	16.0907	14.4831	161.588	111.949	573.675	93.4739	60.1674	43.2086	0	95.5414	70.9312	67.3205	104.921	19.565	60.2584
2310011J03Rik	0	0	0	0	0	0	0	0	0	0	9.23228	0	0	0	15.2206	32.9403	3.38798	13.7269	26.3731	0	19.298	15.2379	8.79144	28.1366	16.4445	0	54.0714	40.3232	97.4628	16.0183	40.324	33.019	16.1475	4.70082	0	0	31.2715	25.0811	0	30.0849	14.3008	11.4787	3.1153	18.2567	22.9198	6.35325	11.4318	6.61761	0
2310033P09Rik	0	0	0	0	0	0	0	0	0	0	0	4.91625	0	0	0	0	0	0	36.9625	0	0	70.9581	0	0	0	0	0	60.7508	34.1276	0	47.2468	0	0	52.3276	0	0	73.4481	0	0	0	0	0	0	0	0	0	0	0	0
2310035C23Rik	0	0	0	0	0	0	0	0	0	0	39.776	0	0	0	0	0	0	0	0	0	0	0	0	0	0	0	0	0	0	0	0	0	0	0	0	0	0	0	0	0	0	0	0	0	0	0	0	0	0
2310036O22Rik	0	0	0	0	32.9695	31.5132	146.788	96.7343	90.0793	53.2342	22.3009	60.3784	5.11901	0	46.4221	93.1303	52.9338	18.8183	0	85.3008	31.6228	0	49.7647	26.7978	85.6569	87.8361	33.0144	29.3827	47.0311	29.3388	10.8696	0	24.2002	27.4996	42.1624	72.9544	36.7599	82.5379	45.1133	36.9174	74.5084	52.2572	24.4488	0	0	48.5527	217.697	23.0794	0
2310057M21Rik	0	0	0	0	0	0	0	0	0	0	0	0	0	0	0	0	0	0	0	0	0	0	0	0	0	0	0	0	0	0	0	96.2924	0	0	0	0	0	0	0	0	0	0	0	0	0	0	0	0	0
2410004B18Rik	0	0	0	0	0	0	0	0	0	0	0	0	0	0	0	0	0	0	0	0	0	0	0	0	0	0	0	0	0	0	0	0	0	0	0	0	0	0	0	0	0	0	0	0	0	0	0	3.71081	0
2410004P03Rik	0	0	0	0	0	0	0	0	0	0	0	0	0	0	29.3632	0	0	0	0	0	0	0	0	0	0	0	0	0	0	0	0	0	0	0	0	0	0	0	0	0	0	0	0	0	0	0	0	0	0
2410016O06Rik	0	0	0	0	0	0	0	0	76.0553	88.7829	75.5999	58.6203	127.521	16.0722	79.3423	109.071	67.5348	27.7803	24.1939	17.8806	148.715	117.72	97.5087	19.721	0	0	0	0	0	0	30.5799	0	85.4326	0	57.0443	41.2172	0	29.9957	0	0	72.2778	75.5325	23.0897	22.497	12.2303	36.2942	50.6475	65.6456	0
2610042L04Rik	0	0	0	0	0	0	0	0	0	0	0	0	0	0	0	0	0	0	0	0	0	0	0	0	0	0	0	0	0	0	0	0	0	0	0	0	0	0	0	0	0	0	0	0	0	0	0	0	0
2700094K13Rik	0	0	66.1225	0	0	0	109.156	123.93	31.3556	82.706	9.55608	0	23.2003	25.6879	69.7229	114.266	0	0	46.4021	58.2985	41.2327	102.473	17.8405	0	134.603	153.573	33.6106	0	0	0	63.8691	27.9818	199.971	20.7604	0	0	64.0824	39.5998	0	0	0	0	42.7941	0	0	0	108.603	0	0
2700097O09Rik	0	0	0	0	33.038	38.453	0	0	38.424	14.4384	24.9364	20.0377	11.5034	0	12.6129	26.0979	66.2921	19.4683	0	0	27.9836	38.8748	22.3408	10.0755	0	0	55.523	45.7203	0	0	19.2917	0	0	0	0	0	11.6905	31.2649	0	0	49.5617	37.093	0	41.275	55.8956	26.5157	8.64563	40.1761	0
2810403A07Rik	0	0	0	0	0	0	0	0	53.0545	0	6.4851	15.0412	0	0	112.208	99.9909	16.8441	20.9787	0	0	38.8346	123.684	12.3272	5.4514	0	0	0	0	23.5949	0	56.5184	0	15.0447	0	9.11362	0	0	0	0	0	48.2314	12.7218	0	0	0	0	0	25.9288	0
2810428I15Rik	0	0	0	0	0	0	0	0	0	0	0	0	0	0	0	0	0	0	0	0	0	12.7671	0	0	0	0	0	0	0	0	0	0	0	48.6964	0	0	0	0	0	0	10.1871	16.8553	0	0	0	0	0	0	0
2810474O19Rik	0	0	0	0	0	0	0	0	0	0	0	0	6.35066	0	88.6012	0	0	0	0	114.804	179.445	194.54	0	191.998	0	0	0	0	322.369	0	0	0	263.61	0	0	0	0	0	0	0	0	88.9539	0	0	0	100.65	126.967	0	0
2900026A02Rik	0	0	0	0	0	0	0	0	0	0	0	0	0	0	0	0	0	0	0	0	0	377.885	0	0	0	0	0	0	0	0	0	0	0	0	0	0	0	0	0	0	0	0	0	0	0	0	0	0	0
3 SV	89.336	0	0	0	0	0	0	0	0	0	0	0	88.4721	0	0	0	0	0	0	0	0	0	0	0	0	0	0	0	0	0	0	0	0	0	0	0	0	0	0	0	0	0	0	0	0	0	0	0	0
3110002H16Rik	0	0	0	0	0	0	0	0	0	0	0	0	15.153	0	0	0	0	0.949059	0	0	0	0	0	4.39895	0	0	0	0	0	0	0	23.5568	0	0	0	0	0	0	0	0	87.9854	4.90718	0	0	55.6988	0	40.8755	41.9027	0
3110009E18Rik	0	0	0	0	0	0	0	0	0	0	0	0	0	0	0	0	0	0	0	0	0	0	0	0	0	0	0	0	0	0	0	0	24.1222	0	0	0	0	0	0	0	0	0	0	0	0	8.6072	0	0	0
4 SV	489.027	0	0	0	0	0	0	0	0	0	0	0	195.393	201.111	0	0	0	0	0	0	0	0	0	0	0	0	0	0	0	0	0	0	0	0	0	0	0	0	0	0	0	0	0	0	0	0	0	0	0
4930402H24Rik	0	0	0	0	0	0	0	0	0	71.2975	0	0	0	0	0	0	50.2342	0	0	0	0	0	0	0	0	0	0	0	0	0	0	0	0	0	0	0	0	0	0	0	0	0	0	0	0	0	0	0	0
4930430F08Rik	0	0	0	0	0	0	0	0	0	90.9758	0	0	0	0	0	0	0	0	0	0	0	0	0	0	0	0	0	0	0	0	0	0	0	0	0	0	0	0	0	0	0	0	0	0	0	0	0	0	0
4930453N24Rik	0	0	0	0	0	0	0	0	0	0	51.1424	0	0	0	0	0	0	0	0	0	17.5422	42.8869	3.16412	0	0	0	0	0	0	0	17.554	0	0	0	0	0	0	0	0	0	0	0	0	0	0	0	0	18.9401	0
4930522L14Rik	0	0	0	0	0	0	0	0	0	0	0	0	0	0	0	0	0	0	0	0	0	0	0	0	0	298.295	0	0	0	0	0	0	0	0	0	0	0	0	0	0	0	0	0	0	0	0	0	0	0
4931406P16Rik	0	0	0	0	0	0	0	0	0	0	0	0	0	0	0	0	0	0	0	0	0	0	0	0	0	0	0	0	0	0	0	0	0	0	0	0	0	0	0	0	0	0	0	0	0	0	45.9508	0	0
4931414P19Rik	0	0	0	0	0	0	0	0	0	0	0	0	0	0	12.3095	45.7472	0	0	0	0	0	40.4235	0	0	0	0	0	0	0	0	0	0	0	0	0	0	0	0	0	0	0	0	0	0	0	0	0	0	0
5730455P16Rik	0	0	0	0	0	0	0	0	0	0	0	17.2311	0	0	98.7748	33.1385	29.2015	55.0722	0	0	105.262	43.5197	25.3477	23.6052	0	0	27.1214	0	0	0	25.6666	0	0	0	0	35.1378	0	0	0	0	0	0	0	0	0	0	0	15.605	0
5730508B09Rik	0	0	0	0	0	0	0	0	0	0	0	0	0	0	0	0	0	0	0	0	0	0	0	0	0	0	0	0	0	0	0	49.2718	0	25.0601	0	0	0	35.6103	0	0	14.1765	18.3967	0	0	0	0	0	9.09542	0
6030458C11Rik	0	0	0	0	0	0	0	0	0	0	0	0	0	0	0	0	0	0	0	0	0	46.298	0	0	0	0	0	0	0	0	31.4845	0	0	0	0	0	0	0	0	0	0	14.362	0	0	0	0	0	0	0
6330403A02Rik	0	0	0	0	0	0	0	0	0	0	0	0	0	0	0	0	0	0	0	0	0	0	0	0	0	0	22.2989	32.7983	20.36	43.7896	0	0	0	0	0	0	0	0	0	0	0	0	0	0	0	0	0	0	0
9130401M01Rik	0	0	0	0	0	0	0	0	0	0	0	0	0	0	0	0	0	0	0	0	0	0	0	0	0	0	0	0	11.9619	0	0	0	0	0	0	0	0	0	0	0	0	0	0	7.52624	27.1601	51.4077	18.7085	0	0
9230110C19Rik	0	0	0	0	0	0	0	0	0	0	0	0	0	7.62673	0	0	0	0	0	0	0	0	0	0	0	0	0	0	0	0	0	0	0	0	0	0	0	0	0	0	0	0	0	0	0	0	0	0	0
9430016H08Rik	191.75	0	0	0	40.466	16.0592	53.6287	0	23.2151	28.7306	74.5872	15.1297	14.3881	0	17.3225	19.7812	19.6283	48.7651	62.3664	19.4768	0	0	13.3209	23.3575	0	0	19.4028	81.1339	48.3701	37.5378	18.8891	32.5478	91.3733	9.35904	23.3602	15.8347	0	0	0	0	39.7017	24.2009	11.8556	9.03174	16.0338	19.3707	27.5348	11.8853	85.6346
9930111J21Rik1	0	0	0	0	0	0	0	0	0	0	0	0	0	0	0	0	0	0	0	0	28.2008	101.459	0	18.7819	0	0	0	0	0	71.9213	0	0	0	0	0	0	0	0	0	0	0	0	0	117.012	0	0	0	0	0
A230050P20Rik	0	0	57.7933	0	0	0	0	0	0	6.47318	18.1215	0	29.947	17.7454	87.5291	95.4125	0	23.6116	114.598	0	102.303	51.5034	16.7453	0	0	0	0	0	0	0	32.4447	17.6926	38.0914	30.5853	0	0	0	0	0	0	0	0	0	0	0	0	62.2714	0	72.0726
A2m	1176.83	380.261	408.337	475.442	606.794	612.209	244.431	200.829	239.394	300.73	171.776	131.599	114.513	156.029	122.987	107.142	96.497	78.128	96.5237	242.247	103.181	151.655	68.8338	87.0153	151.296	211.985	175.643	215.081	147.243	160.639	82.0096	88.5693	84.5732	65.7025	0	0	328.863	304.02	320.982	283.449	0	0	59.4378	345.744	36.4314	47.4511	138.773	0	92.5873
A630001G21Rik	0	0	0	0	0	0	0	0	0	0	0	0	0	0	0	0	0	0	0	0	0	0	0	0	0	0	0	0	0	20.9551	0	0	0	0	0	0	0	0	0	0	0	0	0	0	46.94	0	37.0567	56.2918	0
A830080D01Rik	0	0	0	0	0	0	0	0	0	0	0	0	0	0	123.705	133.995	82.5367	81.9099	245.363	130.387	0	131.349	0	50.3432	0	0	0	0	0	0	33.9044	123.49	28.6415	50.0065	0	0	0	0	0	0	0	1.59187	0	76.0017	0	0	120.913	0	0
Aaas	0	0	0	0	0	0	0	0	11.0173	0	9.78728	76.772	30.9408	115.362	40.9715	34.7558	63.4524	59.4043	0	2.2363	90.5074	0	63.1725	82.5272	0	0	35.5798	44.6626	81.1201	104.842	36.8946	32.5504	62.7051	0	76.2832	126.291	10.3542	0	0	11.9376	65.54	93.12	18.0265	112.104	132.133	54.8869	55.5393	145.54	88.6658
Aacs	0	0	0	0	40.3361	24.7292	148.097	0	69.5796	103.371	43.3644	32.1897	12.2536	0	17.7724	0	34.2897	4.77576	17.3258	52.9744	0	0	0	0	0	0	53.4015	58.339	47.8521	126.686	44.5412	0	18.8729	46.2987	0	0	0	0	0	0	0	0	16.2864	61.7695	88.4068	88.6631	87.0953	66.0474	0
Aadac	0	0	0	0	0	0	0	0	0	0	0	0	0	0	0	0	0	0	0	0	0	0	0	0	0	0	0	0	0	0	0	0	0	0	0	0	0	0	0	0	0	0	0	0	0	0	0	0	0
Aagab	0	152.199	0	0	0	0	0	0	60.6398	73.2907	29.5324	49.2453	11.1439	0	29.2136	82.3716	46.0309	15.3828	9.29523	41.5766	36.3205	44.7396	32.1178	57.1493	0	0	0	0	0	26.3877	32.6235	0	16.8252	5.92872	0	0	0	0	0	0	0	0	0	57.7473	100.273	83.2864	0	39.004	0
Aak1	179.499	0	0	0	94.6886	301.077	48.6145	65.1153	72.827	182.643	141.569	96.9691	134.363	137.117	94.1782	187.296	120.44	142.483	55.5118	116.605	148.497	111.75	164.812	113.825	115.821	218.072	133.227	131.193	203.357	136.204	171.065	228.219	212.625	75.7552	74.4343	70.6864	0	20.8311	63.8136	396.334	27.3958	72.1513	131.424	114.076	115.23	106.617	152.834	94.0928	284.466
Aamdc	56.7009	0	0	0	106.855	43.1261	0	0	11.2049	0	48.9301	56.5573	34.8041	42.1576	33.658	10.8051	81.0871	56.6228	13.9586	77.8312	67.6253	158.854	43.9329	45.9158	0	0	34.9374	55.2663	52.759	46.6224	22.7527	26.5886	115.243	0	19.7767	14.3421	0	0	0	0	34.5712	21.9818	0	21.3994	27.8516	43.4435	58.1401	8.35275	130.582
Aamp	97.0955	90.2014	0	115.942	26.8254	147.672	153.577	157.616	160.498	234.206	70.3917	140.582	73.6121	131.733	129.368	136.506	88.1991	149.229	133.226	97.6666	81.0509	147.137	112.091	120.325	53.1211	205.642	151.612	145.478	104.218	166.435	160.65	254.311	131.626	256.09	89.0034	73.9338	226.174	222.174	53.9257	199.631	153.904	173.921	162.194	180.525	185.406	158.17	133.499	160.137	113.215
Aar2	0	0	0	0	0	0	0	0	0	0	7.96281	14.3206	17.5662	0	0	12.921	31.2922	17.6665	0	0	24.3728	0	12.4447	18.9191	0	0	0	29.7958	0	0	8.99931	53.438	26.3054	14.2825	0	5.96913	0	0	0	0	23.7162	22.701	0	81.1125	95.2833	41.9601	0	77.3553	0
Aars	0	123.864	182.967	0	214.594	224.782	192.803	313.206	203.571	153.624	322.165	294.851	349.551	196.366	309.676	257.69	311.301	311.325	342.061	109.17	264.124	149.404	449.21	357.382	302.961	280.972	453.057	411.632	392.306	257.699	329.374	385.74	130.323	369.287	438.06	352.641	337.443	227.096	328.672	183.435	452.273	453.28	419.174	503.512	345.253	426.97	197.344	436.297	197.606
Aars2	0	0	0	0	0	0	0	0	0	0	0	8.56402	14.4268	0	55.3118	33.5891	0	31.8789	0	0	50.3573	66.3643	29.8135	36.8692	0	0	0	37.6143	0	0	34.6125	107.414	45.6392	0	48.8488	19.4622	9.70152	15.0834	0	0	55.623	77.5441	0	100.717	15.39	61.0836	79.6688	75.7488	0
Aarsd1	36.7921	0	0	0	0	0	120.014	52.1534	47.4612	106.561	194.587	205.125	129.446	84.7974	69.3274	72.8275	85.1611	73.5813	99.7377	22.0471	89.1978	87.502	141.472	166.504	54.7833	63.8106	167.339	119.508	157.804	170.751	111.396	207.177	104.408	128.385	220.522	146.918	220	207.511	101.867	104.441	148.78	170.892	192.885	240.114	164.006	181.235	268.525	153.745	0
Aasdhppt	0	0	0	0	0	0	0	0	0	0	0	0	0	0	33.1641	88.0354	0	53.0871	0	0	24.1704	0	0	0	0	0	0	0	0	0	0	108.186	0	62.7871	0	0	0	61.8935	0	0	40.0177	47.0058	36.3551	0	18.0753	13.0262	0	47.39	0
Aass	0	0	0	0	0	0	0	0	0	0	0	0	0	0	0	0	0	0	0	0	0	0	0	0	0	0	0	0	0	0	0	0	0	0	0	0	0	0	0	0	0	0	0	0	0	0	0	0	0
Aatf	410.011	0	0	0	103.509	35.3162	0	0	114.083	276.68	145.711	106.797	87.2119	83.4654	112.527	206	80.2515	117.372	295.923	45.869	190.107	111.197	58.2795	70.8909	129.462	225.507	90.3994	58.1273	249.508	144.886	95.6816	203.619	138.066	105.196	97.1521	87.7992	245.365	138.958	79.1689	95.4007	143.127	159.009	56.0757	82.4799	82.1699	128.714	102.386	71.6539	77.5796
Aatk	0	0	0	0	0	0	0	0	0	0	0	0	0	0	0	0	0	0	0	0	0	0	0	0	0	0	0	0	0	0	0	0	0	0	0	0	0	0	0	0	0	0	0	0	36.8001	17.8668	87.5864	0	0
Abca14	0	0	0	0	175.724	0	0	0	0	99.9403	0	0	0	42.2863	78.796	64.9269	0	61.7347	0	0	49.9771	0	43.9142	28.3497	0	0	0	0	0	136.48	0	52.9259	187.585	50.9538	37.0179	0	0	0	0	0	0	0	79.4885	57.862	0	0	0	0	0
Abca2	0	0	0	0	0	0	0	0	0	0	0	0	0	0	0	0	0	0	0	0	0	0	0	0	0	0	0	0	0	0	0	99.8332	0	0	14.0156	0	0	0	0	0	0	0	0	0	125.574	0	0	0	0
Abca3	0	0	0	4009.26	0	0	0	0	0	0	0	325.55	0	0	0	0	0	0	0	0	0	0	0	0	0	0	767.976	0	0	0	0	0	0	0	0	0	0	0	0	0	0	0	0	0	0	0	0	0	0
Abca6	0	0	0	0	0	0	0	0	0	0	0	0	0	0	0	0	0	0	0	0	0	0	0	0	0	0	0	0	0	0	0	0	0	0	0	0	0	0	0	0	0	0	0	0	0	0	0	0	0
Abca7	0	0	0	0	0	0	0	0	0	0	0	0	0	0	0	0	0	0	0	0	0	0	0	0	0	0	0	0	0	0	0	0	0	0	0	0	0	0	0	0	0	0	0	0	0	0	77.6366	0	0
Abcb10	0	0	0	0	0	0	166.001	0	0	0	0	0	34.7398	0	73.1854	148.029	85.5522	60.8734	0	115.174	78.7357	64.7465	0	0	0	0	0	0	0	0	141.606	161.351	0	55.0507	38.7701	106.067	167.357	116.808	0	0	90.9559	118.293	90.2366	34.667	78.5255	109.748	109.432	83.9897	0
Abcb11	0	0	0	0	0	0	0	0	54.6084	0	0	0	0	0	49.6705	41.6456	0	15.8748	0	0	90.4671	0	0	0	0	0	0	0	0	0	0	0	0	0	0	0	0	0	0	0	0	0	0	0	0	0	0	0	0
Abcb1b	0	0	0	0	0	0	0	0	0	33.6956	0	0	0	0	0	0	0	0	0	61.7351	0	131.494	0	0	0	0	0	0	0	0	0	0	0	0	41.1005	0	0	0	0	0	0	0	0	0	38.6212	0	0	0	0
Abcb4	0	0	0	0	0	0	0	0	0	0	26.9736	44.7302	0	0	30.9949	11.4338	0	0	0	0	126.095	0	0	0	0	0	0	0	0	0	0	14.4486	0	0	0	0	24.0879	0	36.2678	24.3973	34.2474	59.8823	0	0	0	0	0	0	0
Abcb7	0	0	0	0	0	0	42.9841	101.153	0	0	96.5979	73.6001	32.6801	8.82303	33.791	46.7598	45.982	41.7322	0	73.5448	76.2551	36.4096	85.6477	24.0663	30.0789	134.48	0	0	88.1261	58.5014	60.0748	65.2432	129.266	68.8875	103.914	63.1078	33.7949	59.5508	116.777	119.652	51.1936	110.582	40.7706	59.766	88.4007	127.766	132.522	64.826	0
Abcb8	0	0	238.086	0	0	0	0	0	0	0	0	0	0	0	19.7057	44.6643	55.1864	36.9197	0	0	69.0913	110.495	0	0	0	0	0	0	0	11.377	25.6705	32.9978	46.6491	0	36.2928	0	0	0	0	0	39.5553	37.168	0	0	69.0484	40.3702	94.387	32.9088	0
Abcc1	0	0	0	0	11.2032	0	0	0	0	0	0	28.0855	42.8469	59.4883	21.7805	58.0507	0	34.9901	53.1197	0	37.4394	173.194	6.74546	0	0	0	0	0	0	0	56.9047	43.8911	32.4149	43.1931	0	0	0	0	0	0	0	0	0	24.3594	18.2	8.57745	50.2505	16.9954	0
Abcc4	0	0	0	0	0	0	0	0	0	0	0	0	0	0	0	0	39.203	16.0042	0	0	0	0	0	0	0	0	0	0	0	0	0	0	0	0	0	11.2463	0	0	0	0	32.1772	0	60.8518	0	46.9434	33.4403	0	119.561	0
Abcd1	0	0	0	0	0	0	0	0	0	0	0	12.7048	9.73598	44.4112	0	0	0	0	21.1767	0	45.2337	106.72	23.4851	22.1423	0	0	76.3137	19.8703	64.6398	59.8232	13.4625	14.5295	46.6376	31.3483	47.7111	56.5858	0	0	0	0	33.1517	7.31951	62.5254	172.259	104.798	93.67	83.0734	68.5167	30.948
Abcd2	0	0	0	0	0	0	0	0	0	0	0	0	0	0	0	0	0	0	0	0	0	0	0	0	0	0	0	0	0	0	0	0	0	0	0	0	0	0	0	0	0	0	0	12.1832	0	0	0	60.3605	0
Abcd3	0	0	0	0	0	0	0	0	0	0	36.2651	23.8096	5.05048	0	38.4946	98.9593	19.8731	51.0058	0	0	148.186	51.5335	63.9606	36.9385	0	0	7.71997	115.301	0	73.4726	44.4409	0	0	0	13.8678	61.009	0	0	0	0	64.0777	89.2849	24.0655	75.5387	133.533	44.0228	87.7836	54.0839	0
Abce1	69.7664	313.029	113.817	118.548	254.395	389.891	240.045	262.143	331.298	388.235	260.341	303.914	331.825	253.457	382.762	392.385	260.406	199.056	257.56	269.406	444.33	675.12	175.086	238.231	190.796	254.041	530.792	495.28	547.323	591.72	444.699	294.389	513.686	358.767	180.258	162.459	420.966	399.331	520.259	530.033	482.69	521.138	347.896	313.001	312.837	327.339	493.117	336.076	224.959
Abcf1	0	308.744	431.386	0	428.332	275.869	432.243	369.801	340.526	225.495	402.349	379.857	179.316	200.959	185.203	228.371	323.578	302.552	281.864	338.822	161.945	273.236	185.08	239.84	342.814	221.444	447.827	343.832	901.49	462.279	367.577	356.164	332.273	190.846	381.881	267.348	393.736	557.204	456.375	493.328	437.081	404.977	287.534	334.782	244.978	294.487	309.931	394.508	292.301
Abcf2	0	0	0	0	185.783	322.138	113.426	183.85	133.883	203.115	94.973	201.281	196.655	246.799	150.792	148.296	141.523	92.5724	201.743	151.24	172.823	226.556	146.499	148.97	234.277	339.327	337.211	319.966	226.401	212.645	274.142	277.862	175.11	377.185	205.788	171.847	315.997	288.365	327.842	349.78	274.98	337.753	602.715	387.728	373.187	336.055	385.529	338.859	0
Abcf3	0	0	0	0	41.6977	0	0	32.4489	0	0	0	10.7201	67.0675	70.7547	18.4977	14.9119	42.0789	48.7418	99.4376	0	34.893	72.7103	13.5854	11.9078	0	0	52.5624	19.6443	17.7543	79.335	120.263	20.8104	81.7764	39.9847	0	0	127.325	58.707	206.336	82.1556	86.0012	57.0536	93.8483	110.111	103.074	43.2249	69.489	43.8255	113.938
Abcg2	437.185	0	181.79	0	179.19	114.707	24.41	0	36.1448	83.9099	68.6876	58.5166	30.2225	0	80.4844	24.6404	54.1389	37.8893	0	44.1332	20.5748	62.5334	0	0	0	0	0	0	0	0	0	0	0	0	0	0	6.83767	0	0	0	17.3016	63.0371	0	0	5.88262	21.6755	0	18.8022	26.4968
Abcg3	0	0	0	0	68.7372	25.7773	0	0	0	0	0	14.852	0	0	0	0	0	0	0	0	0	0	0	0	0	0	0	0	0	0	0	0	0	0	0	0	0	0	0	0	0	0	0	0	0	0	0	0	0
Abhd10	0	0	0	0	41.5834	62.5723	0	0	0	0	0	31.5896	0	0	0	0	0	16.2639	0	50.14	0	65.4619	7.40313	17.3978	0	0	0	0	0	0	0	0	0	0	0	0	0	0	0	0	0	0	0	0	0	0	0	0	0
Abhd11	36.2877	84.8083	140.458	0	41.5221	37.0042	96.9399	47.4457	57.2773	54.6146	101.781	22.7995	27.6367	15.3478	95.8454	130.546	69.0884	47.805	0	99.8558	30.2649	40.5948	85.3864	20.6239	12.9709	0	72.5615	63.4023	91.2504	27.0052	73.2046	22.8523	0	13.1761	38.9087	41.7552	44.6321	28.0257	0	0	59.6522	53.9435	20.8665	48.8119	26.2451	27.9545	44.5779	34.6164	0
Abhd12	0	0	0	0	12.3838	0	0	0	0	0	13.7221	14.6085	39.7589	0	23.9953	64.8745	44.7161	74.1636	44.3677	0	49.0753	90.0723	21.6357	18.6282	0	0	0	0	0	0	0	17.3702	0	25.0397	0	26.7378	0	0	0	0	0	0	22.6392	28.8439	71.9982	0	73.0032	71.6784	12.2496
Abhd14a	0	0	0	0	0	0	0	0	0	0	0	0	0	0	0	0	0	0	0	0	16.0315	0	0	0	0	0	0	0	0	0	0	0	0	0	0	0	0	0	0	0	0	0	0	0	0	17.2604	0	10.1706	0
Abhd14b	314.245	414.892	95.9025	442.538	359.516	315.332	214.227	265.984	198.723	298.275	364.265	286.241	197.741	136.53	148.364	152.814	382.082	338.073	208.945	180.534	104.86	120.881	281.208	302.991	91.6752	142.754	182.375	228.417	163.361	249.189	151.366	160.618	186.701	111.374	166.636	216.328	65.9703	105.876	0	0	209.5	184.134	154.826	75.2691	0	55.4088	0	123.852	444.142
Abhd16a	0	0	0	0	57.857	32.7626	0	0	0	0	30.1331	39.0778	0	0	33.3977	48.6067	45.1673	16.4525	0	19.5841	89.9225	137.621	0	33.1337	0	0	0	0	0	0	62.7802	19.4192	0	57.5831	0	64.1337	0	0	0	0	58.9066	67.577	57.6803	0	0	0	0	20.0136	0
Abhd16b	0	0	0	0	0	0	0	0	0	0	18.9173	0	0	0	0	0	0	0	0	0	0	0	0	0	0	0	0	0	0	0	0	0	0	0	0	0	0	0	0	0	0	0	0	0	0	0	0	0	0
Abhd17b	0	0	0	0	0	0	0	0	0	0	0	0	0	0	0	0	0	0	0	0	0	0	0	0	0	0	0	0	0	0	0	0	0	0	0	0	0	0	0	0	0	0	24.2158	0	0	0	0	57.6363	0
Abhd6	0	0	0	0	0	0	0	0	0	0	0	0	0	0	21.2392	0	0	0	0	0	27.7986	0	0	0	0	0	0	0	0	0	0	0	0	0	0	0	0	0	0	0	0	0	0	0	0	0	0	0	0
Abi1	150.113	185.801	186.315	50.2569	76.1674	96.1267	240.312	209.526	216.473	184.994	117.949	98.8318	195.152	89.5017	107.571	132.973	101.195	125.773	203.154	157.15	212.416	188.962	158.704	141.362	264.992	171.504	79.9575	102.479	73.7254	103.759	169.603	148.519	169.302	150.23	142.417	162.623	151.358	106.813	0	142.122	87.7272	104.609	110.086	127.731	100.713	157.471	109.549	111.823	139.191
Abi2	0	0	0	0	0	0	0	0	0	0	0	62.2107	11.9051	99.5264	64.3895	55.4387	25.2148	49.4247	36.3562	66.6009	45.541	120.921	55.8488	75.451	0	0	38.3253	30.815	0	0	69.1237	53.4385	0	69.4916	23.9171	2.76286	0	0	0	0	0	0	0	42.5171	18.8372	58.6439	0	0	22.559
Abi3	39.0976	32.1756	160.834	0	106.191	0	20.9586	16.8541	68.1484	17.8152	39.1586	23.3832	39.8808	22.4529	47.6605	77.3095	59.63	79.3016	164.07	188.339	89.0069	72.9041	96.0668	92.7808	66.3565	31.0609	63.8575	105.601	65.7547	118.878	17.8018	14.906	0	22.5964	0	0	0	0	0	0	0	0	0	0	0	0	0	0	39.8339
Abi3bp	0	0	0	569.042	0	0	0	0	0	0	0	0	0	0	0	0	0	0	0	0	0	0	0	0	0	0	0	0	0	0	0	0	0	0	0	0	0	0	0	0	0	0	0	0	0	0	0	0	0
Abl1	0	0	0	0	0	0	0	0	0	0	0	0	0	67.1696	59.6769	0	55.2658	58.763	0	0	0	0	0	0	0	0	0	0	0	0	0	0	0	0	0	0	0	0	0	0	0	0	57.6721	0	0	0	0	0	0
Abl2	0	0	0	0	0	0	0	0	0	0	0	0	0	0	0	0	0	71.6891	0	0	0	0	0	0	0	0	0	0	0	0	0	0	0	0	0	0	0	0	0	0	24.5597	0	0	0	0	0	0	0	0
Ablim1	0	0	0	0	0	0	0	0	0	0	0	0	0	0	74.5286	138.458	0	0	0	0	88.3789	0	6.14796	0	38.2318	84.3001	77.8655	35.9888	83.0186	0	0	0	0	0	0	0	0	0	0	0	0	0	0	0	0	0	0	0	0
Abr	0	0	0	0	129.75	0	0	0	0	86.4307	113.953	73.8568	91.4505	0	77.3676	66.6144	97.3305	95.9339	111.959	46.9151	85.9045	105.459	114.997	167.426	0	0	134	94.5343	89.6018	40.3456	82.8563	65.5795	67.6753	75.4162	19.3715	53.245	0	0	0	0	0	0	52.4506	96.1039	48.8547	42.0176	54.3511	106.591	57.0332
Abracl	432.099	368.667	253.975	463.447	125.17	177.948	149.352	321.633	231.3	246.549	490.711	535.531	81.5364	117.433	208.568	162.985	224.672	236.212	204.427	167.882	309.375	312.091	265.724	191.087	154.636	192.116	107.135	113.998	92.2315	122.514	138.129	199.126	153.313	192.221	65.8359	78.4644	49.254	53.7571	119.175	76.2328	108.14	63.8724	204.063	85.0886	68.4444	123.366	63.0144	232.722	277.672
Abraxas1	0	0	0	0	0	0	0	0	0	0	0	22.9913	33.6863	31.5524	63.4696	29.9466	48.4518	13.6649	0	0	44.8709	54.8011	56.928	22.1477	0	0	0	0	0	0	62.5615	0	0	0	0	0	0	0	0	0	40.3317	11.9713	0	123.936	107.182	0	71.7943	5.83397	0
Abraxas2	0	0	0	0	77.5554	76.6724	143.579	88.7099	93.669	59.7761	55.1749	107.482	97.2982	176.41	102.483	136.069	122.099	126.394	103.488	167.372	50.5323	0	91.1416	109.411	184.807	97.0477	155.168	163.394	134.25	92.9299	130.181	113.282	42.564	78.6867	70.1504	49.7866	141.09	84.1812	71.4761	103.563	97.1641	31.5657	71.701	96.9452	75.1667	92.6982	67.2169	74.8017	113.294
Abt1	0	0	0	0	0	0	0	0	0	0	0	0	0	0	0	0	0	0	0	0	0	0	0	0	0	0	0	0	0	47.9938	0	0	0	0	0	0	0	0	0	0	88.6279	110.899	0	0	0	53.5869	0	32.7298	0
Acaa1a	31.8321	129.031	234.933	0	22.1584	129.694	133.229	73.109	150.887	148.974	102.755	140.726	118.121	78.5853	172.766	118.78	158.712	141.426	194.676	132.901	169.022	137.674	174.956	144.005	317.962	69.2851	200.47	172.29	263.611	342.727	192.032	189.668	326.352	237.595	213.953	375.673	172.364	162.828	335.884	313.459	256.083	191.861	266.86	239.316	182.364	176.664	214.183	191.755	73.0494
Acaa2	732.677	616.946	908.012	689.417	517.343	519.242	273.077	291.915	311.388	418.847	685.95	563.711	725.458	988.618	519.987	598.103	631.664	629.985	284.251	297.759	473.139	159.923	640.152	641.16	349.969	243.12	416.258	439.083	507.161	512.972	416.01	541.34	259.642	450.586	581.406	747.093	512.842	612.246	402.538	490.047	763.669	813.879	622.111	653.484	493.148	507.498	333.091	674.759	666.889
Acaca	0	0	0	0	0	30.2317	0	0	115.292	0	75.8283	61.0274	60.169	0	198.073	173.501	47.9171	206.431	175.033	0	286.859	214.097	62.5568	94.8935	127.403	0	178.205	227.862	114.655	116.182	250.734	205.634	110.001	182.986	121.613	120.288	193.927	63.8885	0	0	29.4847	79.4283	313.723	334.369	260.859	431.896	285.75	323.184	0
Acad10	0	384.926	0	19.0713	368.833	360.467	0	103.16	0	0	152.102	178.54	38.9635	36.1014	116.92	99.5598	181.535	136.678	0	0	24.8225	105.912	97.8994	81.7769	0	0	0	0	0	0	0	16.5401	0	0	0	0	0	0	0	0	0	0	0	0	0	0	0	12.819	0
Acad11	0	0	0	0	0	0	0	0	0	0	10.3161	0	17.028	38.4905	0	0	0	0	0	0	0	0	0	0	0	0	0	0	0	0	18.5533	28.7244	0	0	0	0	0	0	0	0	7.08289	6.16478	6.34694	62.8995	49.3649	23.1234	0	13.187	0
Acad12	0	0	232.591	0	0	0	103.279	0	134.183	93.3004	0	0	0	0	11.4741	33.3729	0	0	102.971	90.5432	85.0563	0	0	0	0	0	0	0	0	0	33.1623	0	37.0235	57.0002	9.20868	0	0	0	0	0	0	0	0	0	0	0	0	0	172.717
Acad8	0	0	193.581	0	0	62.9635	0	109.799	86.6219	122.668	48.2097	82.0636	59.2195	38.4762	78.3242	81.3649	70.0033	45.9414	62.5951	101.189	61.4941	117.095	107.446	73.296	20.3901	13.0605	79.3942	45.3357	99.0828	108.783	49.1087	68.0795	71.1438	105.83	66.2737	112.276	0	55.7628	0	0	78.5328	85.8845	49.784	96.914	71.9386	56.0852	80.9226	70.2777	122.041
Acad9	65.7418	286.715	667.252	136.563	572.138	524.96	257.094	221.622	317.515	346.401	353.419	307.991	182.523	122.815	221.286	296.12	237.528	182.14	193.658	261.837	235.869	313.324	201.028	220.604	247.832	79.2711	179.815	150.419	140.442	185.993	229.98	110.866	353.634	188.275	159.892	203.551	247.446	247.051	270.053	128.487	144.366	203.116	193.016	228.586	240.766	224.311	155.39	257.732	410.18
Acadl	700.602	360.403	442.164	637.994	772.423	925.601	648.066	489.187	595.991	514.262	639.492	653.074	658.728	934.133	510.749	442.283	515.403	477.105	437.063	465.139	348.418	393.219	667.834	554.783	365.144	299.516	578.312	432.521	402.49	497.548	475.667	486.153	253.84	375.769	598.272	708.548	528.643	478.589	387.527	333.282	707.669	865.53	289.192	267.064	241.567	340.644	244.197	439.973	629.855
Acadm	385.529	626.282	555.75	658.187	567.309	425.932	455.714	400.35	524.895	514.443	316.744	216.51	111.804	173.103	152.928	179.165	233.484	177.572	142.887	517.683	218.938	337.687	242.264	202.62	255.812	373.176	178.482	163.288	159.204	187.803	201.991	179.458	472.037	180.302	172.517	176.417	254.209	281.744	556.583	449.327	165.807	213.962	139.841	107.878	85.5176	204.535	112.964	76.4968	253.819
Acads	463.782	457.381	459.402	393.005	421.108	554.855	325.648	464.327	512.568	507.501	633.729	532.903	505.159	455.522	426.464	494.024	523.605	505.875	532.033	480.975	530.226	521.976	652.138	575.351	189.666	246.468	412.253	513.2	331.042	473.396	318.522	435.005	310.897	322.227	643.684	564.949	300.944	314.488	101.175	104.994	499.746	523.441	354.634	272.909	272.245	333.749	230.292	427.544	450.479
Acadsb	33.7345	98.6734	44.6346	0	34.8258	29.857	117.811	78.8334	46.4909	127.878	44.528	28.3785	55.9564	31.6638	77.241	78.5822	44.557	19.1655	41.9122	91.965	38.9352	60.7899	27.3683	20.7352	0	0	53.3804	19.1915	39.788	48.863	60.9266	11.8115	77.9958	62.0242	22.5895	20.3834	0	0	66.9835	43.6691	14.379	15.5596	111.287	108.778	90.2774	81.7996	37.7574	61.4169	150.651
Acadvl	40.2005	380.748	641.329	259.755	480.892	597.484	418.742	441.444	456.822	476.627	455.692	414.423	193.438	163.901	336.196	336.711	380.562	422.905	200.253	184.09	256.326	259.52	349.332	305.541	0	115.536	151.879	93.8182	175.845	216.51	220.879	323.847	191.621	134.375	394.271	457.4	375.348	382.249	415.519	355.402	484.018	499.576	134.648	93.4669	179.957	194.144	301.415	275.987	772.209
Acap1	0	190.968	0	0	22.6176	72.5005	108.018	151.597	214.169	133.863	227.534	173.532	95.2452	88.7173	193.89	182.964	131.692	127.084	169.455	168.743	108.521	278.347	236.599	164.982	105.233	145.655	116.449	69.5677	125.87	102.979	375.99	194.689	287.053	144.242	101.499	37.046	67.7386	0	0	0	77.0518	92.3543	124.03	67.9225	116.481	474.913	84.7165	110.511	0
Acap2	0	0	0	0	0	0	0	0	0	0	0	0	96.8824	102.269	63.4919	112.826	131.39	0	119.739	182.444	88.8241	0	139.646	46.026	0	107.071	0	0	64.4511	44.1266	199.604	131.516	81.9319	72.4076	0	0	0	0	0	0	0	0	92.6421	93.1551	44.0797	73.1073	82.0735	81.617	23.7339
Acat1	1275.5	1524.96	1675.33	885.739	804.854	905.794	1030.36	1134.76	805.458	905.368	748.042	720.714	1127.07	1445.27	701.29	595.903	897.959	1048.14	672.75	928.178	830.222	359.922	783.275	934.661	914.154	824.95	650.662	589.125	813.185	1070.85	559.213	652.39	989.45	743.035	916.939	786.516	695.11	873.477	831.638	991.132	722.251	765.492	644.44	613.846	611.42	546.223	497.322	494.488	1067.36
Acat2	5.81611	0	26.6404	130.039	51.9056	117.025	85.4931	82.281	53.0714	84.6314	108.819	204.715	107.378	17.063	91.3394	88.1808	66.5498	87.2038	0	83.5815	46.0315	58.2244	122.561	159.114	0	10.8763	51.6822	98.0425	44.7813	47.4359	32.2148	0	83.2333	76.3413	94.9721	107.467	0	86.5181	0	0	64.0642	49.7304	109.609	26.3828	39.4677	78.8762	16.1286	53.1064	150.023
Acat3	19.4306	344.856	0	0	0	0	0	0	0	0	0	0	0	0	0	0	0	0	84.1055	0	0	0	0	0	0	0	0	0	0	0	0	0	0	0	0	0	0	0	0	0	0	0	0	0	0	0	0	0	0
Acbd3	13.2026	350.041	367.161	0	91.2005	77.9742	230.271	193.392	121.705	177.123	0	49.8741	39.9714	119.154	253.325	362.68	93.0036	49.7151	109.197	137.523	254.608	0	43.7327	61.6487	101.206	745.552	180.544	129.548	101.971	92.9246	141.639	132.878	51.2642	162.441	47.7551	80.6718	414.08	258.854	183.093	246.291	52.5512	54.1284	141.367	73.701	76.212	106.834	124.579	71.8157	212.981
Acbd5	0	0	0	0	0	0	0	0	0	0	0	0	0	0	0	0	0	0	0	0	0	49.3371	0	0	0	0	0	59.8691	0	8.69808	0	0	0	0	0	0	0	0	0	0	0	0	0	0	0	0	0	13.5011	0
Acbd6	0	0	0	0	0	0	0	0	0	0	0	0	0	0	0	0	0	0	0	0	0	0	0	0	0	0	0	0	0	0	47.7224	0	0	0	0	0	0	0	0	0	6.47511	0	0	0	0	0	0	8.54566	0
Accs	23.2856	0	0	0	43.9933	74.1511	0	0	37.6067	0	78.6436	61.8743	36.8139	19.3567	72.4626	78.243	55.4295	48.8163	16.865	0	75.8954	21.2268	116.452	46.4775	0	0	31.9235	48.2041	62.3452	149.013	0	22.3675	0	9.36695	21.6179	17.4795	0	0	0	0	0	0	43.1751	6.24188	14.826	0	0	40.9124	0
Acd	0	0	0	0	0	0	0	0	0	0	0	26.1392	0	0	34.3245	23.0513	5.01954	15.2913	0	0	38.6065	0	0	17.2902	0	0	0	0	163.544	0	33.6789	0	0	0	0	0	43.1069	0	0	0	17.7811	0	0	0	0	0	0	40.0995	0
Acin1	540.865	455.095	703.328	203.752	335.032	529.871	357.856	454.358	518.856	511.254	666.339	698.8	358.895	350.485	708.128	808.403	727.419	759.763	545.513	567.058	776.058	564.117	679.419	729	1050.59	1582.69	512.975	527.345	838.576	788.881	754.927	618.809	796.823	607.803	926.906	898.865	1061.23	831.746	1594.44	1336.81	730.71	795.313	539.861	671.168	712.925	628.274	701.276	459.896	643.136
Acly	118.465	291.537	295.944	0	361.934	376.867	639.031	720.868	599.453	628.985	445.97	374.827	876.092	671.007	381.387	366.601	473.603	447.671	683.458	604.311	342.739	276.557	391.051	430.192	264.824	246.717	534.933	605.006	508.484	432.154	464.412	736.236	325.154	733.892	455.983	346.078	560.309	557.886	664.913	489.177	507.009	568.893	724.779	370.983	404.709	473.988	342.24	389.768	307.699
Aco1	123.324	167.185	256.922	0	472.118	374.885	263.234	126.052	279.08	254.276	400.743	266.048	150.201	66.9628	189.92	172.173	341.886	446.05	319.256	250.303	210.575	244.849	281.196	281.484	0	0	140.986	242.737	258.109	129.262	249.505	206.751	179.492	135.364	151.982	126.552	366.512	259.022	134.329	210.753	216.739	185.15	74.0917	137.027	208.904	124.046	202.867	109.915	382.363
Aco2	1697.04	3183.83	2456.56	2337.74	3260.85	2658.25	2016.72	2101.15	1926.51	2018.25	2155.3	1904.81	1961.26	2056.52	1787.78	1816.87	1827.22	1959.42	1185.73	1546.37	1394.38	1255.92	1730.75	1653.11	1558.22	1374.67	1844.81	1899.19	1530	1636.15	1334.75	1611.03	1950.77	1035.79	2022.71	1974.9	1705.8	1629.48	1986.42	1849.01	2103.06	2099.91	979.582	1370.77	1403.14	1348.88	1377.63	1647.05	1800.22
Acot1	0	447.031	261.086	340.346	80.2021	95.3665	287.917	313.987	136.375	106.239	105.319	120.002	120.321	157.312	107.88	128.026	92.0755	79.0935	61.8443	383.895	195.603	230.965	88.3197	55.4884	0	217.918	160.762	0	0	0	7.1058	0	40.053	49.8397	0	0	0	0	0	0	0	0	0	93.0155	44.339	0	0	4.34975	557.98
Acot10	0	0	0	0	0	0	0	0	0	128.12	0	0	0	0	0	0	0	0	0	0	0	0	0	0	0	0	0	0	0	0	0	0	0	0	58.9362	0	0	0	0	0	0	0	0	59.8645	0	0	0	0	0
Acot11	0	0	0	0	107.187	86.5987	0	0	0	0	90.5821	102.501	25.1418	0	0	50.0146	97.794	96.475	83.9025	0	114.655	47.3795	99.0585	62.113	0	0	0	0	0	0	0	0	0	0	0	10.549	0	0	0	0	0	0	0	0	0	0	0	17.6197	0
Acot13	68.8435	174.502	52.5074	183.877	54.7617	85.1065	37.9675	47.9856	57.6566	46.9629	25.8289	29.5328	13.2726	0	18.1673	0	92.6998	85.6527	19.0602	160.808	0	0	37.3531	66.4583	0	50.3289	0	31.7843	14.3165	30.9892	0	16.6927	36.9352	51.3674	18.6161	24.3594	24.7625	30.8959	73.2988	111.63	71.0537	84.3515	0	31.2955	29.7388	24.3266	0	0	56.8576
Acot2	124.291	0	83.1772	0	571.049	610.984	15.3834	0	350.896	337.754	489.901	585.334	4.46965	10.0721	317.877	301.967	443.546	388.646	255.38	46.4314	378.369	362.063	437.433	423.321	161.092	0	0	169.792	299.775	218.408	169.823	153.464	129.416	221.89	289.844	268.932	96.8272	84.1493	175.336	133.948	116.963	161.388	99.4823	26.6855	75.4252	145.244	28.4536	121.065	40.6434
Acot7	139.084	316.074	273.968	154.403	196.58	174.121	212.587	251.157	191.471	101.258	147.794	94.5401	323.983	209.023	256.245	288.543	131.472	175.93	328.545	246.642	56.3287	145.856	127.241	140.934	241.2	195.158	154.016	128.953	180.681	128.816	298.528	194.41	141.158	221.833	129.652	110.061	107.644	75.7561	113.83	102.252	63.1398	102.948	279.548	245.933	168.329	273.707	186.396	97.2535	189.453
Acot8	0	0	0	0	0	0	0	0	0	0	0	0	0	0	0	0	0	0	0	0	42.5019	31.651	0	0	0	0	0	0	0	0	0	19.3478	0	0	0	0	0	0	0	0	0	0	0	0	27.4224	35.9213	0	19.2163	0
Acot9	0	0	136.57	0	259.501	178.606	235.12	107.698	0	0	142.027	248.918	76.633	39.3568	82.171	88.4759	125.229	122.996	113.227	0	104.519	124.483	134.405	84.2963	0	0	10.7354	0	29.7315	0	48.27	131.111	33.6251	91.3973	0	51.6228	0	0	0	0	73.121	40.8005	99.3291	0	29.8709	82.2431	0	85.0779	0
Acox1	0	0	0	0	230.188	0	0	0	96.1905	0	78.7176	51.4428	73.305	87.8592	29.5952	34.1836	70.5506	55.5482	71.9736	138.576	0	230.633	69.9244	87.4574	0	32.2307	117.289	99.6998	123.805	116.217	60.2077	53.0256	71.1236	69.8693	85.6966	80.0018	0	0	0	0	7.98586	29.6675	66.3868	37.8577	59.3024	81.408	65.2674	52.5159	0
Acox3	0	0	0	0	0	0	0	0	0	0	0	0	113.709	0	8.11248	0	0	0	28.1393	0	8.91177	0	11.0894	17.8144	0	0	77.0465	106.895	39.5544	19.4588	0	0	0	5.61559	47.2412	26.4363	0	0	0	0	0	0	72.8868	153.652	139.175	85.4832	176.722	92.5073	0
Acp1	200.623	99.1454	277.718	344.703	302.539	218.41	330.787	238.787	184.974	184.907	170.319	157.279	174.497	185.597	104.55	30.0464	123.396	119.373	85.4222	157.499	59.9568	44.4167	118.948	104.524	269.844	181.364	179.688	155.08	185.074	181.395	103.806	166.358	144.659	144.598	68.6385	111.871	209.861	237.567	302.202	301.063	124.602	129.8	150.738	148.051	66.9156	171.256	50.4218	91.8041	160.855
Acp5	0	0	0	0	0	0	0	0	0	0	25.2316	31.4868	0	0	0	0	0	20.7338	0	0	0	0	13.5061	26.3955	0	0	0	15.0034	99.4425	81.3359	0	0	0	0	0	0	0	0	0	0	0	0	0	0	0	0	0	21.2808	0
Acp6	36.8424	360.405	101.794	243.612	131.489	182.993	112.586	136.791	69.6096	82.0615	123.396	88.2756	172.544	268.144	81.8355	59.7226	63.9683	118.669	114.347	52.2879	22.7541	0	103.983	95.4013	100.559	80.025	93.0255	52.8563	106.554	43.198	63.9939	78.0491	118.56	106.932	175.997	108.936	107.728	62.4593	162.97	133.899	75.9904	116.384	135.363	87.0082	96.4592	51.9281	67.4147	64.7921	170.745
Acsbg2	0	0	0	0	0	0	0	0	0	0	0	0	0	0	0	0	0	0	0	0	0	0	0	0	0	0	0	0	0	0	0	48.3824	0	0	0	0	0	0	0	0	0	0	0	0	0	0	0	0	0
Acsf2	348.982	621.241	711.853	372.873	602.142	546.192	416.072	368.975	464.603	497.287	542.696	595.568	393.026	421.354	313.503	324.503	596.463	564.99	477.366	629.04	584.014	332.522	517.469	474.312	449.675	463.979	565.481	553.65	535.652	472.471	204.289	203.16	316.599	304.612	317.918	383.365	0	0	89.1824	80.5459	167.521	189.238	122.872	281.013	191.833	235.091	242.164	181.904	639.135
Acsf3	0	0	421.219	0	19.9312	31.553	0	0	0	5.34211	43.7161	38.7444	56.7494	0	86.6872	37.8548	31.7928	79.1041	26.6906	0	163.273	112.674	67.5972	41.9453	0	0	6.74765	12.9759	0	28.8376	35.9115	40.878	27.0964	84.9793	7.23734	38.0211	0	0	0	51.2572	40.4303	60.6112	82.2966	22.8363	53.6649	41.379	145.382	61.7581	62.1853
Acsl1	0	0	0	0	81.805	130.475	0	0	74.0253	121.542	118.916	91.4617	44.7419	36.6151	191.331	191.165	199.103	144.071	232.399	98.1271	38.091	31.8283	74.8194	64.7095	0	23.2353	102.876	66.9053	54.3673	107.949	194.376	219.385	193.004	237.982	194.847	236.526	418.261	395.74	389.377	563.299	547.923	474.051	341.605	335.351	342.231	246.371	196.455	394.581	175.962
Acsl3	0	0	0	0	0	0	0	75.4605	0	0	15.1196	45.6102	12.5907	0	104.634	28.4206	60.5212	61.3277	0	109.324	70.668	0	53.6971	36.1322	0	0	0	0	0	9.76896	100.505	174.56	79.768	165.426	16.4278	14.1389	0	0	0	0	41.3612	55.3863	145.233	56.1076	55.9819	33.3989	0	43.8274	0
Acsl4	0	0	0	0	0	8.48611	0	0	0	0	22.1126	71.9149	0	0	58.4762	0	33.98	45.6864	0	22.0795	0	178.871	41.2663	53.5932	0	0	37.928	44.93	53.8594	66.9713	77.1392	86.9985	42.7588	0	53.3606	36.5144	42.2138	25.4538	0	0	93.0799	46.3798	17.8734	92.1737	123.358	94.5681	115.196	94.424	0
Acsl5	0	0	0	0	180.105	41.1944	0	63.1647	0	20.183	160.69	111.44	78.875	0	24.814	83.2873	131.953	129.34	88.8892	0	0	93.7701	161.226	169.885	0	49.1493	142.935	81.598	80.8065	100.212	74.1984	121.055	81.3782	137.174	319.625	168.389	240.213	277.358	421.039	285.355	358.3	532.987	132.787	78.8044	112.178	107.595	54.3136	184.147	0
Acss1	0	0	0	0	144.12	139.014	13.2441	116.976	57.2697	43.6037	116.327	87.2229	66.1015	39.3123	21.907	84.6132	98.742	55.258	108.733	0	0	146.907	85.7506	110.231	0	0	241.972	281.412	114.597	325.885	164.427	150.981	59.2868	158.369	165.295	145.476	260.863	296.746	155.457	180.832	328.866	392.314	47.2989	0	23.7691	87.3223	0	58.2446	0
Acss2	221.519	50.9245	364.749	0	285.341	296.88	247.409	106.077	314.572	390.548	210.764	192.671	88.1498	95.9587	192.668	125.261	155.906	164.743	123.846	97.7167	134.17	64.6175	155.527	140.649	0	0	0	56.2887	0	0	173.421	81.5209	87.0386	96.7284	40.096	50.8775	146.905	150.361	45.5423	107.959	209.569	198.756	0	146.751	62.8516	24.0132	74.6136	0	255.458
Acta1	0	392.381	676.829	0	0	0	0	0	0	117.659	0	1194.42	406.376	986.998	871.968	744.282	0	0	127.163	0	360.414	151.964	0	0	168.186	0	0	0	0	0	0	324.396	65.0856	327.035	0	1512.61	0	0	299.111	108.946	0	0	419.387	421.367	681.091	0	0	0	0
Actb	31828.5	20868.5	18069.5	17819.1	12983	14811.1	56.2718	18053.8	12390.8	13164.3	185.643	15677.2	21855.7	34472.6	10864.1	11252	21124.3	15929.3	18589.9	15587.1	9285.96	10627.6	17036.9	19095.8	128.217	173.695	16657.7	15789.9	50.0026	11996	10217.7	15901.9	0	14618	16822.3	17502.7	10088.9	10884.5	8857.28	10738.2	12439.8	16290.3	14190.1	13812.5	12142.6	11510.8	0	14319.1	23291.8
Actbl2	0	0	0	0	0	0	0	0	180.67	0	27.3586	32.9187	86.0578	0	0	0	58.279	52.4263	71.1712	92.2491	0	0	51.0261	53.4899	0	0	0	0	0	0	0	72.2372	0	113.994	49.9221	34.8446	0	0	0	0	66.0607	89.1187	64.9151	0	0	0	0	66.514	130.455
Actc1	156.447	0	0	0	406.543	411.128	1668.32	1377.84	140.414	0	1529.36	0	58.7599	0	0	0	2509.62	2362.23	160.243	547.545	0	0	2089.52	2574.81	0	0	1727.26	1206.61	133.841	172.918	1012.73	0	0	0	2194.51	0	0	0	0	0	1216.68	1842.63	33.2443	0	0	745.362	0	2194.21	977.159
Actg1	7274.45	33.72	0	0	27.464	68.9027	16354.5	0	0	0	15016.7	116.765	6105.6	5548.34	43.8121	14.474	119.319	151.768	73.6262	30.0063	34.8367	19.8686	225.571	158.334	12709.8	11566.3	81.7427	102.653	13322.3	59.5695	16.6674	144.742	9639.74	262.63	134.404	116.473	27.2623	22.1885	0	0	113.842	110.946	16.8625	376.571	572.091	489.838	6253.46	271.254	68.1003
Actl6a	486.627	460.534	489.261	150.567	372.688	497.25	231.601	328.481	464.152	390.267	309.525	424.872	484.363	601.554	250.784	408.112	368.707	494.572	465.897	261.74	255.401	299.344	410.108	327.556	437.346	387.287	394.364	428.45	580.133	512.021	335.918	393.285	492.893	400.117	520.936	615.018	311.364	289.877	518.744	484.235	593.302	580.313	277.206	386.092	404.052	422.03	257.803	426.947	657.398
Actn1	643.706	209.112	275.137	227.632	311.153	418.932	376.112	366.511	222.226	444.813	553.329	581.828	427.984	450.632	631.602	520.771	415.419	530.134	510.681	477.63	535.687	464.417	455.264	555.173	0	0	78.9965	100.917	139.408	167.95	225.403	216.603	282.869	395.792	287.429	392.336	0	0	144.145	264.571	84.4658	65.6453	215.954	294.248	234.477	230.815	447.449	316.164	392.805
Actn2	0	0	0	0	0	0	0	0	0	0	47.0952	0	38.9343	6.52934	117.579	128.092	0	0	0	0	0	0	0	0	0	0	0	0	0	0	0	0	0	0	0	0	0	0	0	0	0	0	0	0	0	0	0	0	0
Actn3	0	0	0	0	0	0	565.605	286.746	0	0	0	0	0	42.1818	0	0	0	0	0	0	0	0	0	0	0	0	0	0	0	0	0	0	0	0	0	0	0	0	0	0	0	0	0	0	0	0	0	0	0
Actn4	2482.23	0	1520.25	2345.68	1845.86	1582.66	1773.47	1745.81	1857.81	2064.61	1892.9	1891.13	2176.47	1920.46	1803.97	1641.73	1567.45	1636.67	1344.14	1308.51	1412.29	1564.24	1705.12	1664.45	1950.74	1710.35	1606.23	1769.76	1217.73	1592.44	1799.8	1405.43	1190.04	1287.02	1825.63	1820.69	1717.43	1543.07	1322.41	1312.1	1738.83	1846.63	1231.63	1175.65	1270.94	1314.82	1753.03	1610.27	1805.19
Actr10	0	0	0	0	103.45	148.714	81.1898	71.6252	196.894	92.4932	43.5659	89.2463	40.0476	15.5304	69.0025	42.2269	99.4277	89.1743	39.8804	112.771	51.5328	0	58.9347	60.444	40.4881	158.997	70.4923	90.2369	62.2892	65.8336	42.0456	71.9274	43.6946	96.0597	65.4397	75.6791	67.9748	25.1009	118.066	283.586	79.8785	43.6092	96.3582	43.1904	38.9129	63.938	118.342	56.655	68.8939
Actr1a	280.341	486.772	310.669	104.474	161.593	175.228	183.011	229.958	163.427	166.808	207.38	178.144	265.389	216.835	280.366	180.984	179.434	186.739	110.33	120.324	61.3756	91.3378	210.891	228.746	261.822	201.918	278.412	187.896	190.422	139.296	217.746	140.487	330.315	202.698	201.543	197.728	200.763	133.403	207.81	222.51	198.184	157.122	281.699	261.501	213.992	226.564	179.758	223.437	269.893
Actr1b	0	69.7291	177.03	0	51.7568	95.6784	67.0936	49.4996	80.7882	90.3986	68.5023	34.2596	111.267	73.3242	105.793	83.2483	43.5247	55.2709	152.949	103.959	0	64.3162	60.4359	76.3626	68.7916	0	63.0298	24.6418	24.7143	26.2222	66.545	92.7517	125.078	108.386	86.5302	56.2203	58.9342	61.3292	50.2675	65.4409	46.7652	19.7986	48.4828	52.9326	57.4741	32.4931	126.051	42.269	94.9873
Actr2	363.325	302.61	359.736	213.22	315.028	522.915	381.632	470.835	231.46	172.724	351.315	355.821	1406.74	1127.1	182.482	245.7	384.523	400.774	469.226	296.011	225.031	163.805	521.008	488.031	449.759	620.238	318.241	422.268	372.529	315.021	446.649	352.168	390.828	549.692	416.455	335.372	255.814	488.711	344.726	444.802	310.94	241.676	606.179	321.525	384.426	456.053	223.944	538.917	356.533
Actr3	620.033	1045.43	1182.66	1480.59	853.608	1142.43	1157.3	842.22	1075.18	1065.59	1226.85	1149.17	679.52	966.174	1015.29	1114.79	1065.49	1241.52	1559.61	966.065	1371.99	1333.43	1460.75	1357.82	1129.47	858.78	989.984	952.289	996.866	992.829	1202.37	1257.75	1230.81	1517.63	1309.94	1129.07	787.398	657.231	649.878	1066.82	716.605	813.838	1630.11	1310.56	1631.08	982.797	864.705	1387.39	734.144
Actr5	0	0	0	0	0	0	0	0	0	0	32.3171	30.3532	19.5098	0	62.7374	48.9319	20.9235	8.77355	0	38.3061	89.6083	96.8149	91.6285	53.9197	0	0	0	0	0	0	35.0784	0	0	0	14.5626	17.6226	0	0	0	0	41.6695	51.914	12.3213	0	28.2536	25.2936	0	48.6961	0
Actr6	0	0	0	0	0	0	0	0	0	0	0	0	35.3925	0	16.6267	55.8622	0	0	0	0	0	0	0	0	0	0	0	0	0	0	102.116	10.4784	63.9962	31.4729	0	0	0	0	0	0	0	0	0	0	0	0	29.9257	0	0
Actr8	0	0	0	0	0	0	0	0	0	0	0	0	0	0	0	0	0	0	0	0	11.4166	76.9633	0	0	0	0	0	0	0	0	0	0	0	0	0	0	0	0	0	0	0	30.3592	0	0	50.5539	0	0	40.5312	0
Acy1	319.146	271.631	101.527	338.179	230.99	299.28	684.254	258.86	255.17	305.952	281.249	305.065	233.183	338.253	293.317	289.624	327.68	371.495	257.137	347.288	279.241	210.746	316.57	353.235	191.536	146.171	261.581	223.763	221.756	152.727	283.85	273.846	196.346	158.39	308.874	274.805	134.185	95.5057	0	0	74.6973	105.148	247.734	188.392	170.202	172.725	123.468	256.135	20.0399
Acy3	80.4526	61.2182	65.3316	0	113.379	104.036	25.9235	0	30.14	27.2533	76.0943	104.505	32.1108	26.3317	64.3282	51.9819	62.1017	63.2927	0	0	90.0027	58.5034	15.6529	17.5902	0	0	0	0	0	0	1.99957	25.4984	14.9527	0	0	15.8839	0	0	0	19.8186	0	11.8218	0	0	27.5952	12.1287	0	0	41.7081
Acyp1	269.291	406.753	394.365	351.388	247.295	219.186	249.745	150.825	200.025	206.574	166.462	126.541	143.575	107.478	146.462	135.206	168.868	157.797	24.1047	143.654	46.1724	57.0304	90.528	84.2166	112.011	105.242	87.4449	88.1551	113.115	162.568	153.65	31.4915	100.425	81.0486	59.2809	71.7746	168.514	206.811	120.878	164.475	82.1921	95.2182	18.2476	78.4243	71.6643	86.3065	81.2004	46.3896	136.677
Acyp2	19.7541	0	0	0	97.4365	56.3065	0	0	0	0	63.5158	31.2445	0	0	16.5043	0	40.6773	48.0294	0	0	0	0	0	0	0	0	0	0	0	0	0	0	0	0	0	0	0	0	0	0	0	0	0	0	0	0	0	0	127.862
Ada	651.417	553.581	554.315	959.226	531.731	374.513	480.56	489.187	395.809	295.596	332.607	279.154	616.35	501.901	390.42	351.911	404.672	501.869	491.461	507.402	528.002	564.691	529.18	545.73	505.417	456.686	526.143	455.289	287.73	310.451	307.302	410.175	300.151	448.486	342.999	334.152	197.017	246.214	100.482	94.1122	122.302	165.043	399.824	85.6099	155.333	166.691	144.239	115.693	262.577
Adal	0	0	0	0	0	0	0	0	0	0	0	0	0	0	33.3746	0	11.1302	13.5602	0	0	19.0952	47.4131	2.72883	12.2137	0	0	0	0	0	0	0	0	0	0	0	0	0	0	0	0	0	0	0	0	0	0	0	3.22809	0
Adam10	0	0	0	0	214.378	170.546	0	0	139.919	46.1023	115.041	121.417	51.3042	80.869	129.16	176.214	103.465	170.851	168.089	188.365	126.566	256.55	76.9291	81.1284	0	0	38.0927	20.8471	68.5288	27.148	106.961	185.309	43.5338	139.593	165.173	173.918	132.552	0	0	0	205.276	155.362	120.32	114.91	113.563	86.1451	88.9441	129.149	98.056
Adam11	0	0	0	0	0	0	0	0	0	0	0	0	0	0	0	0	0	0	0	0	0	0	0	0	0	0	0	0	0	0	0	0	0	0	0	0	0	0	337.661	0	0	0	0	0	0	0	0	0	0
Adam17	0	0	0	0	0	0	0	0	0	0	41.2155	38.8517	84.6186	178.182	22.7774	0	17.7885	65.3401	0	0	58.7888	94.7736	73.9697	33.0642	0	0	47.8308	87.5677	0	0	49.0126	0	0	0	33.0993	56.3977	0	0	0	0	29.3487	22.2506	85.977	0	135.967	190.475	108.57	139.41	0
Adam22	0	0	0	0	0	0	0	0	0	0	0	0	0	0	0	0	5.5405	5.50537	0	0	0	0	0	0	0	0	0	0	0	0	0	0	0	0	0	0	0	0	0	0	0	0	0	0	0	0	0	0	0
Adam3	0	0	0	0	0	0	59.8393	0	0	0	0	0	0	0	0	0	0	0	0	0	0	0	0	0	0	0	0	0	0	0	0	0	0	0	0	0	0	0	0	0	0	0	0	0	0	0	0	0	0
Adamts2	287.61	0	0	0	0	0	0	0	0	0	0	0	0	0	0	0	0	0	0	0	0	0	0	0	0	0	0	0	0	0	0	0	0	0	0	0	0	0	0	0	0	0	0	0	0	0	0	0	0
Adap1	0	0	0	0	0	0	0	0	0	0	0	0	7.90981	0	0	0	0	9.16138	0	0	14.8847	0	0	0	0	0	0	0	0	0	0	0	0	0	0	0	0	0	0	0	0	0	0	0	0	0	0	50.3597	0
Adar	0	0	109.37	0	0	0	0	0	115.423	148.81	101.812	37.2228	47.6448	0	95.9649	100.094	74.9146	135.177	93.5391	52.0982	96.4534	179.13	35.8608	91.6485	30.0735	98.0665	45.2493	66.0767	151.001	102.906	151.997	39.8546	128.599	0	27.6255	50.9973	171.147	53.1166	32.4489	148.902	58.3598	80.7946	111.608	41.2784	76.8748	75.6099	201.225	70.0245	0
Adat1	0	0	0	0	144.114	0	45.2132	0	40.9925	117.106	38.4587	20.8574	0	0	45.3661	53.3829	19.4344	45.4279	165.919	0	50.651	53.6666	100.177	40.102	0	0	0	0	0	0	17.8603	112.251	0	12.9381	0	0	0	69.0247	0	0	0	0	62.2066	18.375	53.776	0	0	0	0
Adat2	46.5701	0	27.6704	0	0	0	0	0	0	7.33444	23.0315	12.4746	35.9219	62.7989	28.7481	10.8239	0	31.5157	64.4546	0	73.163	75.9995	50.4316	32.3656	0	0	8.95496	22.5071	0	0	38.5654	23.6451	0	20.2838	0	42.185	27.0458	25.1523	0	0	8.79795	0	0	19.4507	6.60336	10.2195	32.7085	7.36795	0
Adat3	0	0	0	0	0	0	0	0	0	0	0	0	0	0	0	5.5295	0	0	0	0	0	0	0	0	0	0	0	0	0	0	0	0	0	0	0	0	0	0	0	0	0	0	0	0	0	0	0	0	0
Adck1	0	0	0	0	0	0	0	0	0	0	0	0	0	0	0	0	0	0	0	0	0	0	0	0	0	0	0	0	0	0	0	0	0	0	0	0	0	0	0	0	0	0	0	0	0	0	0	0	0
Adck3	120.116	107.753	203.296	77.4	78.7386	0	23.8951	0	106.633	32.847	39.5129	53.7642	13.535	0	19.7142	41.3469	74.1655	81.5264	32.106	33.022	68.0038	34.4064	60.3308	64.4038	0	0	0	0	0	0	20.4185	27.0827	53.6301	62.2568	0	0	0	0	0	0	0	0	0	0	0	0	28.5738	0	133.111
Adck4	0	0	0	0	0	0	0	0	0	0	0	0	0	0	9.21738	17.4344	21.6774	14.3558	0	0	47.9812	100.327	10.424	0	0	0	0	0	49.2573	0	0	0	0	0	11.193	0	0	0	0	0	3.70933	19.4757	0	0	0	10.1068	0	16.2989	0
Adcy7	0	0	0	0	0	0	0	0	0	0	0	0	0	0	0	0	0	0	0	0	92.5504	77.8089	19.0456	10.8389	0	0	0	0	0	0	38.4771	144.484	36.2034	74.6509	0	0	0	0	0	0	0	0	0	0	0	0	70.2695	0	0
Adcy9	0	0	0	0	0	0	0	0	0	0	0	0	23.8055	0	0	0	0	0	0	0	0	0	0	0	0	0	0	0	0	0	0	0	0	0	0	0	0	0	0	0	0	0	0	0	0	0	0	0	131.115
Add1	0	0	267.216	0	59.9366	51.0327	165.31	93.2423	179.359	235.261	126.218	58.4986	90.9003	232.36	42.1731	136.47	53.3993	73.2091	277.451	116.758	318.11	367.73	101.504	93.1258	181.564	128.218	100.891	154.419	113.74	177.428	269.108	219.638	309.508	260.131	47.3902	89.749	520.355	339.001	340.563	387.586	164.263	111.117	56.6473	105.074	148.673	90.2273	120.535	90.9845	265.161
Add2	0	0	0	0	0	0	0	0	0	0	0	0	0	0	0	0	0	0	0	0	0	0	0	0	0	0	0	0	0	0	0	0	0	0	0	0	130.43	75.988	0	66.6363	156.127	101.194	0	0	0	0	0	0	0
Add3	0	0	0	0	0	122.229	62.0896	0	160.15	173.83	57.084	54.0138	297.042	265.747	165.539	116.672	111.209	141.201	271.516	185.613	108.256	198.622	123.322	117.506	266.283	286.373	4.0953	59.9018	31.6658	77.3377	135.003	309.616	342.27	198.726	138.346	197.732	107.66	155.101	250.814	153.263	97.0199	112.603	152.299	94.5369	128.614	122.217	143.313	63.9032	20.9937
Adgre5	357.632	0	120.518	0	202.86	162.124	0	0	87.3771	79.3564	121.06	98.1627	289.409	84.0983	72.2987	42.0758	57.9284	39.024	0	0	0	0	0	0	0	0	0	0	0	0	19.3508	137.27	43.2741	28.28	16.3232	34.1853	371.226	65.8762	112.181	166.134	187.476	152.251	28.2434	0	0	0	32.441	67.8656	153.574
Adgrg1	322.287	324.509	359.011	978.103	464.857	485.547	487.19	451.932	332.324	316.819	146.397	199.56	195.332	291.839	210.949	161.007	133.246	110.469	109.884	211.496	95.0239	226.277	35.2617	84.4539	62.7191	0	35.4911	48.0923	132.898	105.224	219.261	171.178	194.824	123.043	95.7305	80.4798	0	0	0	0	26.0715	12.1693	21.9907	43.3641	47.4857	68.4308	0	22.7231	368.889
Adgrg3	0	0	0	0	0	0	0	0	0	0	0	0	0	0	0	0	0	0	0	0	0	0	0	0	0	0	0	0	0	0	0	0	0	0	0	0	0	0	0	0	0	0	44.5649	0	0	32.8794	53.3399	102.591	0
Adgrg7	0	0	0	0	0	0	0	0	0	0	0	0	0	0	17.8707	0	0	0	0	0	0	0	0	0	0	0	0	0	0	0	0	0	0	0	0	0	0	0	0	0	0	0	0	0	0	0	0	0	0
Adgrl2	0	0	0	0	0	0	0	0	225.506	0	0	0	0	0	86.2941	0	0	0	0	0	0	0	0	0	0	0	0	0	0	0	35.2368	0	0	0	0	0	0	0	0	0	30.8325	86.6046	0	0	0	0	0	0	0
Adgrl4	92.5168	0	78.8037	0	19.9853	23.128	0	0	35.1076	58.0056	33.952	22.6412	84.8382	0	41.5488	42.5107	89.7537	77.8373	0	95.4092	82.8937	56.3939	76.7927	68.4485	0	0	0	0	0	0	16.0053	0	49.1511	0	0	0	0	0	0	0	0	0	0	17.2665	0	0	0	0	61.2876
Adgrv1	0	0	0	0	0	0	0	0	0	0	0	0	0	0	0	0	0	0	0	0	0	0	0	0	0	0	0	0	0	0	0	0	0	0	0	0	0	0	0	0	0	0	0	0	0	0	0	81.113	0
Adh5	301.233	462.047	535.999	646.047	208.949	239.339	370.711	256.025	217.006	176.489	228.997	292.263	449.315	310.24	246.316	253.062	300.853	358.604	432.147	464.647	283.555	193.729	271.121	376.674	169.245	213.44	219.899	215.984	236.355	310.247	145.229	259.026	196.617	419.033	228.273	174.264	200.023	249.835	211.678	99.2968	156.619	160.182	203.367	320.296	524.822	251.367	202.993	141.671	355.414
Adi1	153.634	0	0	0	54.2245	66.6793	0	136.556	0	0	230.125	200.223	125.115	161.523	127.619	140.798	227.239	224.882	156.435	0	79.5248	181.318	221.017	182.749	0	0	149.909	136.793	37.765	22.5337	89.4769	187.164	22.6475	156.061	125.654	142.872	113.662	157.502	38.5586	48.5144	160.629	126.033	99.9481	18.4865	85.2861	77.1677	0	106.277	55.7561
Adk	294.171	246.846	203.253	574.146	334.71	286.453	261.667	156.974	297.324	266.724	295.313	396.155	123.714	230.952	250.921	263.505	280.992	281.322	157.612	232.151	180.118	221.899	273.968	268.582	230.227	116.663	321.119	392.339	362.068	269.07	259.413	183.622	260.904	282.633	322.659	238.598	372.669	470.2	369.204	486.35	331.125	417.121	178.882	71.3842	93.3642	121.04	209.133	152.254	288.678
Adnp	0	0	0	0	0	27.1914	319.389	305.993	249.384	303.205	178.691	226.187	131.584	93.5663	431.145	330.942	362.495	405.305	324.831	318.294	467.066	754.045	433.666	312.031	443.362	382.54	149.359	156.287	338.32	387.598	406.89	716.88	461.207	463.079	363.13	248.319	201.462	222.666	424.68	107.271	378.31	300.496	266.12	203.522	191.241	241.189	306.905	255.458	329.36
Adnp2	0	0	0	0	0	0	0	0	0	0	0	0	0	0	0	0	0	0	0	0	0	0	0	0	0	0	0	0	0	0	0	54.3012	0	90.5617	0	0	0	0	0	0	0	0	0	0	0	0	0	0	0
Ado	22.3774	0	131.982	0	0	17.9154	75.2333	45.1251	96.6211	69.5334	69.9387	49.8173	90.9298	110.146	31.3344	44.106	35.9352	14.947	77.5782	111.493	98.1121	0	10.7906	19.0531	0	41.8175	85.4901	93.8291	74.6316	159.923	77.8356	41.7373	32.1281	45.1514	13.2413	0	14.8555	71.8489	0	0	14.1603	14.1428	14.2173	40.111	32.2868	32.5737	64.7065	19.8393	0
Adpgk	21.2444	96.0205	79.659	0	35.3228	79.7029	56.7166	102.472	142.434	172.687	73.5868	53.5067	126.117	0	92.4745	116.35	96.8465	85.0923	127.737	123.27	240.208	112.555	61.636	45.3271	107.296	35.2517	86.9585	116.473	114.472	181.281	125.082	105.019	81.2124	58.7979	128.778	135.708	140.263	183.556	109.979	121.63	96.2266	121.575	107.749	297.133	102.856	79.4762	123.01	102.144	142.392
Adprh	32.7466	109.51	83.1073	0	168.208	162.422	70.0162	77.9857	60.2472	102.106	234.029	225.945	228.409	129.497	214.983	180.911	265.395	276.04	177.889	65.618	164.943	183.145	191.676	220.996	78.3242	123.847	156.782	191.882	218.951	140.261	128.184	120.942	141.671	254.972	215.799	204.616	115.62	29.399	107.643	196.658	161.328	230.755	198.584	83.2728	66.2764	101.157	68.5579	124.483	216.203
Adprhl2	347.407	345.653	213.7	333.528	159.114	187.667	113.411	170.779	108.929	156.969	150.767	105.26	213.782	176.349	141.112	174.791	100.647	111.011	202.736	115.942	121.537	124.68	112.545	73.5771	119.386	64.7079	123.284	108.64	91.2398	30.5045	95.4196	123.642	69.5061	89.0113	103.271	74.5523	105.339	110.801	168.569	29.1918	127.639	130.374	54.1082	128.042	74.7778	41.9661	122.421	84.5518	291.75
Adprm	0	0	0	0	0	0	0	0	0	0	24.3744	0	0	0	26.4364	30.7186	0	0	0	0	99.8197	86.2114	0	0	0	0	0	0	0	0	0	0	0	0	0	0	0	0	0	0	0	0	0	0	22.4638	16.5429	61.6799	0	0
Adrm1	0	0	0	0	33.4443	0	0	0	0	0	47.77	36.8032	3.32998	0	33.1522	25.0282	23.1064	12.4437	0	0	0	0	22.6064	18.4188	0	0	0	0	99.2984	0	9.77997	26.0587	0	60.5233	28.5593	15.6149	0	0	0	0	46.4933	26.4139	50.918	60.7397	63.5637	20.1341	0	9.40246	0
Adsl	197.968	500.1	389.236	200.055	305.591	246.034	386.956	433.158	284.544	308.4	384.6	365.29	196.265	245.945	265.144	265.452	214.871	330.483	203.125	384.568	294.122	359.412	372.821	303.512	208.751	320.483	263.34	262.498	242.106	194.9	332.938	228.042	212.982	272.477	347.159	239.949	575.846	469.517	264.27	228.256	191.223	272.959	345.851	172.993	110.102	239.102	92.913	214.471	221.083
Adss	188.571	306.17	365.568	591.452	287.019	373.965	203.499	422.736	326.316	310.488	377.232	257.914	241.822	237.954	359.859	372.936	298.66	461.261	348.942	274.644	399.681	367.684	377.844	378.926	311.753	262.596	673.838	464.247	497.767	474.216	463.695	401.708	461.581	278.978	371.147	256.396	378.188	350.378	598.459	490.791	433.372	425.262	400.353	530.9	588.891	439.806	676.854	522.629	357.985
Adssl1	2547.11	631.995	493.704	193.182	588.7	555.944	334.707	456.747	401.182	405.261	534.144	559.179	383.889	627.983	536.606	565.449	563.947	574.846	311.348	622.224	358.359	537.221	667.949	557.962	46.5039	59.1903	305.963	324.635	339.928	375.16	390.552	227.859	342.592	291.585	301.22	268.466	0	0	127.957	63.9695	45.2715	35.7851	534.92	497.786	572.868	569.321	999.748	765.342	639.273
Aebp2	0	0	0	0	0	0	0	0	0	0	0	0	0	0	0	0	0	0	0	0	0	0	0	0	0	0	0	0	0	0	0	0	0	0	0	0	0	0	0	0	13.3783	15.5679	0	19.1189	53.2732	47.7011	0	0	0
Aen	0	0	0	0	0	0	0	0	0	0	0	0	0	0	0	0	0	0	0	0	0	0	0	0	0	0	0	0	0	0	0	5.01318	0	0	0	0	0	0	0	29.5618	24.232	0	0	4.98007	34.0364	0	37.6099	0	0
Aes	0	0	0	0	0	0	0	0	0	0	0	7.14344	0	0	23.6581	65.0918	37.6208	42.0252	0	30.4565	39.3794	28.3765	34.8727	47.3285	0	0	30.5847	0	37.6402	21.9656	43.1948	0	0	0	29.6242	0	0	0	0	0	0	0	0	0	0	0	6.0723	32.7181	0
Afap1	0	0	0	0	0	0	0	0	0	0	0	0	0	0	0	0	0	0	0	0	0	0	0	0	0	0	0	0	0	0	0	0	0	0	0	0	0	0	0	0	0	0	31.7626	57.7568	66.2357	70.4244	23.6275	45.8669	0
Afap1l1	0	0	0	0	0	0	0	0	0	0	0	0	0	0	9.83963	38.9755	0	34.887	0	0	0	0	44.067	51.7818	0	0	0	0	0	0	0	0	0	0	0	0	0	0	0	0	0	0	0	0	0	0	0	0	0
Afdn	0	0	354.916	0	0	0	371.249	114.895	138.022	172.268	156.737	185.238	77.9853	53.8823	343.477	251.773	122.027	140.227	307.301	0	208.759	246.509	186.078	57.706	0	0	0	0	0	0	87.1937	151.142	292.337	0	0	0	0	0	0	0	0	0	0	0	0	0	0	0	234.258
Aff3	0	0	0	0	0	0	0	0	0	0	0	9.44181	67.1514	0	151.959	248.838	36.7429	18.2601	0	141.544	115.95	175.995	33.0462	33.9232	0	0	13.1016	110.784	0	97.2784	123.186	0	0	0	0	58.751	116.763	0	0	0	82.1839	0	0	0	0	0	0	0	0
Afg1l	0	0	0	0	0	0	0	0	0	0	0	0	0	0	0	0	0	469.781	0	0	46.0565	0	0	9.47482	0	0	0	0	0	0	0	0	0	0	0	0	0	0	0	0	0	0	0	0	22.0343	0	0	0	0
Afg3l1	0	0	0	0	0	0	0	0	0	0	0	0	23.7496	0	0	0	0	0	0	0	0	58.5852	0	0	0	0	0	0	0	0	0	0	0	0	0	0	0	15.9102	0	0	0	17.6416	0	0	71.8409	36.5003	150.936	87.0272	0
Afg3l2	0	173.393	0	0	131.155	86.2833	0	0	15.1185	132.713	134.374	167.691	54.8797	0	220.329	151.151	136.835	174.783	43.3167	85.6525	118.888	227.704	72.3744	123.379	0	0	107.611	0	54.6558	30.6104	39.1096	47.6406	64.4766	40.0555	143.868	58.2649	0	155.555	0	0	199.931	152.02	0	44.5079	55.2602	132.205	90.1539	104.838	106.861
Afp	0	0	0	0	0	0	0	0	0	0	0	0	0	0	0	0	0	0	0	0	0	0	0	0	0	0	0	0	0	0	0	0	0	0	0	0	0	0	0	0	0	0	0	0	24.7859	0	0	0	0
Aftph	22.1616	0	0	0	111.026	53.898	0	0	0	0	35.8341	28.2886	76.1674	32.0305	100.3	0	70.4684	67.8313	173.646	143.691	146.978	76.2288	22.992	69.5047	0	0	74.9151	83.1254	178.066	97.4158	78.4424	50.3131	101.693	115.369	46.9976	30.0871	88.5305	0	0	0	62.0908	41.6117	121.894	91.0673	100.773	38.4212	48.4393	55.765	209.375
Aga	107.547	0	0	0	30.6126	40.1851	0	0	0	18.4793	58.4509	53.2477	163.211	245.488	66.3971	60.2328	92.4251	51.8918	73.4399	0	45.1081	12.9026	61.3511	35.9101	0	9.70118	44.3904	59.8709	0	0	51.1763	97.8177	109.243	100.422	104.165	139.19	0	0	30.7315	0	110.59	69.404	73.1644	38.0463	43.6082	84.4952	103.625	113.102	57.954
Agap1	0	0	0	0	0	0	0	0	0	0	0	0	0	0	0	0	0	0	0	0	0	35.7632	0	0	0	0	0	0	0	0	0	0	0	0	0	0	0	0	0	0	0	0	0	0	0	0	0	0	0
Agap2	0	355.793	302.654	614.807	241.579	374.461	110.072	206.807	167.101	158.982	85.4294	78.4683	65.1728	78.7435	96.6161	263.736	215.376	153.615	128.856	104.477	162.994	122.233	115.426	85.8825	235.505	286.63	61.1263	54.8149	46.4718	101.303	81.4451	150.283	163.799	93.772	69.0426	66.2359	46.8059	102.24	0	0	29.4445	20.0178	200.404	94.2145	128.054	49.287	175.489	59.5137	213.899
Agap3	0	0	0	0	0	0	0	0	0	0	0	0	0	0	0	0	0	0	0	0	15.5835	0	0	0	0	0	0	0	0	0	0	0	0	0	0	0	0	0	0	0	0	24.363	0	0	0	0	0	0	0
Agfg1	63.9179	0	46.4696	200.163	63.8409	63.6017	53.5969	52.8918	140.476	127.254	135.724	131.564	54.2191	30.2079	165.903	140.388	128.738	71.1548	132.669	27.313	204.528	95.2772	107.97	126.015	86.3613	125.185	54.4906	34.0024	83.4378	60.3627	79.3327	158.197	203.914	92.3192	120.723	98.5561	64.0275	98.5239	38.4564	616.451	76.5927	61.1261	107.582	14.0372	44.372	17.6595	77.1239	45.4861	46.8541
Agfg2	0	0	0	0	0	0	0	0	0	0	0	2.84665	0	0	0	0	0	0	0	0	0	0	0	4.56182	0	0	0	0	0	0	0	0	0	0	0	0	0	0	0	0	0	18.0831	0	0	0	0	0	0	0
Agk	0	131.688	0	0	250.448	259.091	126.043	91.6034	37.9778	45.0628	166.568	125.315	107.198	59.2949	109.753	76.7652	165.485	231.695	73.5898	125.532	76.663	115.767	211.449	148.988	0	0	98.9489	136.334	188.514	158.458	126.959	65.3991	152.21	90.7484	208.728	195.084	101.214	119.923	0	17.0894	174.609	151.187	55.8851	177.079	141.78	113.619	96.8869	153.269	141.189
Agl	0	0	128.627	0	0	0	0	0	120.238	298.717	40.8267	76.4611	0	0	102.045	90.4046	2.74998	110.328	0	0	172.444	177.005	12.8371	4.25719	0	0	0	0	0	0	0	0	0	0	0	0	0	0	0	0	0	41.9105	83.6781	133.587	98.5078	79.04	165.666	110.628	0
Ago1	0	0	224.871	0	238.276	274.564	73.6502	0	86.3122	143.147	90.8161	276.782	56.99	5.83979	180.307	198.737	297.642	222.88	62.0247	125.45	192.801	197.167	139.379	38.3874	0	0	43.9524	59.384	0	18.2097	187.632	137.315	155.395	128.876	0	18.2581	0	0	0	0	0	21.8792	102.337	0	26.266	29.5527	89.7031	0	140.579
Ago2	0	0	0	0	0	0	0	0	0	0	75.9497	133.643	141.691	32.2698	35.3704	101.592	135.162	108.667	108.188	77.7803	79.0592	45.9702	112.231	169.784	0	0	102.341	117.113	66.0986	98.9891	90.5807	0	0	0	69.1947	117.912	0	0	0	0	93.0183	106.724	0	106.645	165.838	56.1842	18.9047	142.143	0
Agpat1	0	0	0	0	0	0	0	0	0	0	0	36.4517	6.86838	0	27.6721	38.7943	49.3945	63.3618	23.2136	0	0	0	30.4054	50.4456	0	0	0	0	0	0	0	68.221	0	20.9809	0	0	0	0	0	0	28.6114	0	23.5516	19.7358	47.0116	0	0	0	0
Agpat2	0	0	0	0	0	0	0	0	0	0	0	0	0	0	0	0	0	0	0	0	0	0	0	0	0	0	0	0	0	0	4.02504	0	0	0	0	0	0	0	0	0	0	0	0	13.7876	0	7.04568	0	0	0
Agpat4	0	0	0	0	0	0	0	0	0	0	0	0	0	0	0	0	0	2.17363	0	0	0	0	0	0	0	0	0	0	0	0	0	0	0	0	0	0	0	0	0	0	0	0	0	0	0	0	0	0	0
Agpat5	0	0	0	0	0	0	0	0	0	0	0	0	0	0	0	0	0	0	0	0	0	0	18.0317	0	0	0	0	0	0	0	81.1794	0	0	61.618	0	0	0	0	0	0	0	0	101.857	0	0	0	0	31.2885	0
Agps	0	0	0	0	0	0	0	0	0	0	0	0	22.2089	0	21.9502	83.1586	0	27.8219	43.47	0	98.2318	135.012	16.56	47.5001	0	0	67.1952	48.2646	93.099	64.3864	60.9363	29.7086	0	50.2563	82.2761	89.3767	0	0	0	0	129.982	122.586	209.118	180.999	344.303	241.853	226.809	374.422	0
Agrn	0	376.817	0	0	0	0	0	0	0	0	0	0	0	0	0	0	0	0	0	0	0	0	0	0	0	0	0	0	0	0	0	0	0	0	0	0	0	0	0	0	0	0	0	0	0	0	0	0	0
Agtrap	0	0	0	0	0	0	0	0	0	0	50.6482	38.6329	0	0	29.7811	21.3273	0	0	0	0	0	0	21.4217	41.7724	0	0	0	0	0	0	0	0	0	0	0	0	0	0	0	0	0	0	0	0	0	0	0	0	0
Ahctf1	55.4465	144.067	574.171	0	168.069	66.3048	205.512	276.627	182.121	250.349	196.633	245.198	265.732	203.353	347.004	280.843	316.557	4178.81	386.556	184.543	360.049	453.083	259.295	230.2	576.942	338.268	171.309	178.757	204.097	162.37	590.888	629.084	470.098	427.478	369.176	308.041	668.689	950.914	3136.92	979.5	506.655	575.807	263.309	407.953	372.779	5594.77	491.505	230.121	384.725
Ahcy	896.647	2227.56	1374.61	2137.53	1614.84	1034.69	1338.33	1291.49	1125.21	1098.25	1153.77	891.366	1139.66	1237.89	911.479	684.229	873.727	997.909	1068.11	1167.71	1082.61	563.2	837.107	828.01	479.856	375.302	1119	1104.87	845.573	834.202	691.086	862.437	967.687	869.932	399.215	435.893	693.364	1028.1	845.476	661.579	498.735	486.402	773.708	765.345	536.944	600.675	1256.97	746.513	1184.74
Ahcyl1	0	0	205.4	0	149.705	138.835	258.783	174.849	131.248	189.54	208.949	151.915	10.3694	147.59	210.349	305.975	231.399	173.414	0	0	56.4523	55.4171	266.235	183.163	236.456	0	182.481	216.874	142.003	124.171	317.93	178.883	222.211	151.887	89.3779	136.468	343.055	230.582	0	0	132.012	206.915	182.154	183.305	151.148	133.267	155.581	62.4264	229.404
Ahcyl2	0	0	0	0	0	0	0	0	0	0	0	0	140.709	0	0	0	0	0	130.227	94.7583	0	0	0	0	0	175.31	0	0	0	0	0	0	0	0	0	0	0	0	0	61.9658	0	0	0	0	24.489	0	0	0	0
Ahdc1	0	0	0	0	0	0	0	0	0	0	0	0	0	0	70.6764	40.0354	72.3955	95.3688	85.4064	0	136.512	109.14	0	43.2959	95.6644	0	29.4528	70.2109	43.8385	0	79.8466	0	0	0	67.7458	34.8457	0	0	0	0	0	0	0	0	0	0	0	0	75.1154
Ahnak	247.525	0	504.515	0	288.391	365.603	0	0	0	0	74.0818	246.069	113.915	174.747	0	0	0	105.874	240.378	278.574	217.485	388.146	103.588	137.955	690.892	411.603	157.518	118.135	0	192.043	129.428	126.08	209.53	154.295	0	120.368	313.224	0	0	0	0	0	0	0	152.99	199.634	0	0	257.682
Ahnak2	0	0	0	0	0	0	0	0	0	0	0	0	0	0	0	0	0	0	0	0	0	0	0	0	407.506	0	0	0	0	0	42.3009	0	0	0	0	0	51.5324	0	0	0	0	0	0	0	0	93.261	0	0	0
Ahsa1	282.49	211.395	130.129	174.242	239.297	289.234	165.8	114.405	272.922	202.852	480.166	452.925	386.304	191.492	360.454	465.849	237.94	355.844	407.039	156.348	305.426	491.931	401.453	352.551	516.084	406.927	399.976	444.054	230.089	227.75	477.688	546.824	429.228	392.061	453.003	313.114	374.008	387.492	466.747	735.505	474.894	472.409	386.497	537.639	403.481	473.289	280.085	502.917	475.366
Ahsa2	0	0	0	0	0	0	0	0	0	0	0	0	0	17.8418	3.43569	322.246	0	0	0	0	3.72525	0	0	4.29853	0	0	24.9763	4.05206	0	0	0	51.6631	0	0	0	3.72774	0	0	0	0	0	0	25.208	0	9.63722	0	0	2.04373	0
Ahsg	603.584	0	0	0	433.578	437.665	0	54.5084	72.9839	77.6495	157.914	105.66	0	307.828	33.7799	15.5999	76.2047	0	70.1787	0	0	52.2933	0	0	206.743	139.152	163.225	205.666	205.891	120.972	0	0	10.2967	24.5764	0	0	0	0	24.1553	69.298	0	6.57945	0	48.6284	0	35.1559	0	0	43.2188
AI314180	0	243.03	462.028	0	580.49	659.765	455.516	215.533	534.388	548.032	568.553	593.287	406.067	286	481.774	493.916	551.873	623.965	394.289	498.42	466.847	514.514	605.581	597.513	57.9031	124.638	619.693	523.563	682.574	761.016	456.27	432.443	513.717	496.209	679.56	528.588	301.73	274.374	84.696	287.019	583.644	560.793	660.089	634.4	557.254	490.775	688.181	716.923	772.581
AI467606	0	0	0	0	0	0	0	0	0	0	0	9.15608	0	0	0	0	0	22.8695	0	0	0	0	26.5383	0	0	0	0	0	0	0	0	0	0	0	0	0	0	0	0	0	23.365	34.1996	0	0	0	0	0	19.7082	0
AI837181	43.4933	109.645	0	151.715	161.163	102.226	94.9713	59.5805	86.4182	91.8927	68.208	95.6911	52.8603	31.7552	31.3912	60.1903	65.8197	50.3708	0	67.45	0	0	34.303	88.403	92.2927	48.3965	80.7332	106.009	71.457	252.39	89.2038	60.817	87.4219	103.312	24.2232	50.8141	47.22	45.208	83.2962	54.2819	20.5907	76.4298	34.2453	57.9218	61.4694	36.2175	28.4553	39.5828	182.163
AI846148	0	0	0	0	0	0	0	0	0	0	0	0	0	0	0	0	0	0	0	0	0	41.0611	0	0	0	0	0	0	0	0	0	0	0	0	0	0	0	0	0	0	0	0	0	0	0	0	0	0	0
Aida	0	0	83.1922	0	0	0	0	0	0	0	0	16.8165	20.7156	29.6959	43.3953	28.5999	0	0	81.7922	0	0	16.6338	15.2979	7.82636	0	0	0	0	0	0	0	0	0	0	0	0	8.9915	0	0	0	0	0	0	18.9778	40.2187	28.0755	0	0	53.8549
Aif1	0	0	0	0	0	0	0	0	0	0	13.0803	0	0	0	32.4923	51.8644	26.731	7.53371	0	0	12.2587	0	8.48989	6.98069	0	0	0	0	0	0	0	0	17.499	0	0	0	0	0	0	0	0	0	0	0	0	0	0	0	0
Aifm1	582.73	289.103	236.612	352.387	321.011	317.397	266.861	300.465	306.759	211.805	341.122	339.275	190.27	162.752	186.848	171.913	323.21	232.994	324.853	296.241	66.6937	130.778	337.637	312.905	116.468	70.926	279.024	333.642	135.221	144.723	257.867	188.603	280.746	370.255	271.662	431.51	212.047	290.775	283.467	207.022	412.113	322.925	398.343	292.721	238.588	286.27	236.351	299.1	644.84
Aim2	0	0	0	0	0	0	0	0	0	0	117.722	27.4165	3.11119	0	30.2174	63.3655	0	16.1073	21.7681	0	30.648	0	2.40852	26.7969	0	0	251.459	312.787	0	0	40.1074	0	0	0	0	0	0	0	0	0	0	0	0	0	0	27.4694	0	127.594	0
Aimp1	222.632	256.526	356.154	877.291	375.245	646.674	324.633	293.561	479.21	549.392	454.093	564.109	324.895	374.102	407.556	429.147	446.767	444.959	425.725	303.156	383.924	576.638	489.337	453.822	261.223	379.204	371.762	356.366	462.209	433.656	363.175	538.887	361.098	338.233	552.205	496.55	503.143	403.827	481.768	368.205	417.74	616.719	333.273	410.869	370.228	318.826	347.459	434.217	333.141
Aimp2	0	78.2295	228.033	58.1666	206.404	133.046	73.4525	41.9522	188.045	218.233	293.68	388.768	109.74	178.348	274.125	316.452	372.279	217.084	147.83	149.264	302.997	174.867	248.977	215.205	101.373	84.2663	181.588	167.811	203.71	209.023	205.787	164.09	107.318	171.305	273.437	254.479	135.456	131.575	123.911	141.687	203.961	255.724	167.323	141.968	171.234	156.587	123.004	212.603	281.669
Aip	131.42	354.228	224.298	294.475	234.144	365.263	208.882	292.808	318.054	311.726	291.342	265.522	248.052	162.447	274.587	266.941	309.497	280.403	337.112	337.364	272.139	253.663	325.366	331.821	393.678	334.907	381.931	390.391	272.684	227.746	202.706	160.059	274.93	225.028	386.767	287.633	154.801	132.931	169.657	114.956	259.249	160.45	248.035	242.866	193.733	181.151	166.647	265.532	280.787
Ak1	1070.22	408.275	433.752	616.408	413.146	500.115	274.218	265.898	457.539	229.487	357.697	215.763	87.4067	183.399	116.986	115.616	155.914	166.193	66.219	137.963	59.4241	112.623	107.715	123.715	0	0	0	0	0	0	32.03	33.077	39.6427	41.9084	69.7608	14.0377	0	0	0	0	1.6391	0	0	0	0	0	0	30.1722	600.536
Ak2	1419.6	557.271	696.581	970.784	914.003	880.899	571.141	506.29	537.06	618.013	624.54	518.767	761.569	954.112	384.798	321.02	412.892	416.288	835.102	416.551	384.464	409.821	379.806	402.046	575.26	852.417	963.481	894.203	760.042	864.548	378.555	502.27	367.435	562.179	468.898	498.724	509.91	797.739	500.831	509.679	616.686	716.007	761.433	446.275	382.335	480.742	346.666	574.608	843.542
Ak3	477.359	308.849	436.61	604.931	280.697	248.772	334.827	426.781	368.655	306.18	239	498.837	402.594	341.631	321.979	364.411	252.177	340.642	268.835	562.773	271.103	98.5401	288.675	412.737	101.678	103.564	227.003	163.856	212.435	295.955	203.549	196.22	169.413	151.94	269.036	392.015	220.035	236.503	226.442	347.97	256.831	356.532	68.7305	121.186	122.357	163.641	81.6932	63.5035	440.965
Ak4	0	0	0	0	0	28.0209	30.4982	118.945	70.8886	41.3998	74.8096	94.816	16.4894	0	46.1444	53.6191	45.8944	84.0702	40.4231	52.5529	38.3984	22.9617	101.043	74.0405	0	0	0	0	4.78067	0	23.346	5.60707	0	0	63.7099	24.5201	0	0	0	0	0	0	0	22.2445	41.9088	37.1382	25.0676	66.764	0
Ak6	0	0	0	0	0	0	0	0	0	0	0	0	0	0	0	0	0	0	0	0	0	0	0	0	0	0	0	24.4694	0	0	0	0	0	0	0	0	0	0	0	0	21.7412	23.1066	0	0	0	0	0	0	0
Akap1	0	0	0	0	0	0	0	0	0	0	0	0	0	0	31.6565	59.8773	0	0	0	0	41.0311	77.6872	0	6.50814	0	0	0	0	0	0	0	53.7908	0	99.6275	35.2201	0	0	0	0	0	31.6696	38.2327	96.3639	0	0	50.4902	51.0091	0	0
Akap10	0	0	0	0	0	78.8841	0	0	0	40.7133	0	0	10.4972	33.873	44.5082	68.1112	12.6102	27.2045	47.7954	0	49.7109	171.797	52.2746	17.36	0	0	5.21023	0	36.0431	0	45.9828	22.2997	23.6392	23.4634	19.4984	54.9269	0	0	0	0	50.7731	18.5664	70.334	120.703	59.101	72.1841	130.014	53.7897	0
Akap11	0	0	0	0	0	0	0	0	0	0	0	0	0	0	0	0	0	25.3482	0	0	24.6638	0	0	0	0	0	0	0	0	0	0	0	0	0	0	0	0	0	0	0	0	0	0	0	0	0	0	0	0
Akap12	0	0	0	0	0	0	0	0	0	0	0	0	0	0	0	0	0	0	0	0	0	0	0	0	1440.68	1289.85	433.673	557.957	279.855	335.884	0	0	0	0	0	0	0	0	0	0	0	0	0	0	0	0	0	0	0
Akap13	160.666	360.982	1042.66	0	176.417	201.425	508.108	347.433	357.729	402.648	602.791	501.431	778.9	878.414	653.818	696.791	636.74	582.964	902.028	425.241	438.904	608.865	471.384	438.325	845.953	546.378	248.473	272.607	351.385	283.58	797.61	701.165	832.83	637.024	474.366	402.252	202.637	246.21	262.497	103.993	222.495	181.338	342.859	370.386	393.568	400.734	384.004	225.307	823.062
Akap8	185.258	453.717	487.258	345.477	279.22	312.077	314.938	287.848	369.597	321.42	299.056	203.401	174.862	189.933	357.237	387.304	253.277	230.53	269.046	225.317	411.837	358.302	184.099	251.784	234.45	318.31	193.876	284.491	223.542	191.361	289.683	377.135	134.063	322.958	247.199	237.259	453.167	313.362	338.555	154.127	366.618	198.702	174.762	151.082	131.414	202.838	149.088	106.373	120.722
Akap8l	0	0	0	0	164.418	115.592	122.221	0	0	0	35.2701	37.6363	35.2543	0	0	76.3277	52.8993	19.1864	0	0	0	0	19.0726	23.0121	0	0	0	0	0	0	95.2362	67.1932	0	46.3292	0	0	89.0675	0	0	0	60.4144	84.3288	0	0	0	0	0	0	38.7483
Akap9	0	0	0	0	259.175	0	0	0	0	0	363.645	202.096	127.204	26.2649	299.188	327.641	253.36	132.705	0	175.69	567.95	549.479	108.007	93.3118	0	0	156.968	175.78	243.429	40.18	403.97	381.172	284.588	288.955	115.709	95.7478	0	0	0	0	256.328	185.604	317.744	373.225	402.876	304.821	226.12	240.208	0
Akirin2	0	0	0	0	0	0	0	0	0	0	0	0	0	0	0	0	0	0	0	0	0	23.1424	0	0	0	0	0	0	0	0	0	0	0	0	0	0	0	0	0	0	0	0	0	0	0	0	0	0	0
Akna	0	0	0	0	0	0	0	0	0	0	0	0	0	0	0	0	0	0	0	0	78.0249	292.855	0	23.4631	0	0	0	0	0	0	0	0	0	0	0	0	0	0	0	0	0	0	0	0	39.7775	0	0	0	0
Akr1a1	584.061	456.643	643.579	952.889	581.655	533.792	486.42	643.491	493.891	597.155	458.978	530.824	428.512	389.404	391.815	323.665	448.685	454.58	501.173	453.11	442.147	410.081	350.867	408.569	348.459	366.457	377.567	387.226	231.984	331.364	428.859	211.674	466.845	355.959	429.298	322.783	340.844	343.998	297.707	331.294	230.397	272.256	324.544	234.455	222.654	254.525	328.705	318.915	546.689
Akr1b10	0	0	0	0	113.55	194.431	80.5342	0	106.333	80.0734	101.601	133.156	71.7677	179.952	169.36	137.678	107.637	158.519	55.3358	69.7941	136.569	115.079	112.893	116.779	0	0	30.3993	19.7878	0	0	103.978	41.3293	0	70.92	71.1455	58.5321	0	0	0	0	33.4844	42.7402	53.4989	112.432	65.8409	49.3265	48.3805	82.3788	0
Akr1b3	611.844	1487.58	1399.06	1662.65	1201.46	1249.84	904.664	952.402	931.6	1120.17	800.095	750.691	622.407	1448.25	662.003	798.712	980.189	779.821	838.279	798.425	750	527.2	827.238	763.478	757.384	732.126	933.28	825.094	665.55	1124.21	786.764	581.897	811.862	782.291	474.124	452.311	520.616	450.286	1116.68	621.167	468.701	417.164	630.306	510.638	497.079	495.393	841.997	536.11	1344.89
Akr1b7	0	0	0	0	0	0	0	99.6282	0	0	0	0	0	0	0	0	0	0	0	0	0	0	0	0	0	0	0	0	0	0	0	0	0	0	0	0	0	0	0	0	0	0	0	0	0	0	0	0	0
Akr1b8	0	0	0	0	0	0	0	0	0	0	0	0	0	0	0	0	0	0	0	0	0	0	0	0	0	0	0	0	0	0	0	0	0	0	0	0	0	0	0	0	0	0	0	0	0	0	0	0	0
Akr1c12	0	0	0	0	0	0	0	0	0	0	51.3028	16.5786	20.3191	0	17.3424	22.2687	44.4876	19.7343	0	0	21.88	0	48.1808	27.5512	0	0	0	0	0	0	0	0	20.0007	3.40161	0	0	0	0	0	0	0	0	0	0	0	0	0	0	0
Akr1c13	235.622	103.528	176.067	0	137.705	121.169	90.0153	125.827	196.56	300.428	236.99	169.294	175.324	103.911	230.644	163.656	113.904	254.113	104.765	101.651	233.806	99.3449	231.341	231.7	0	0	35.2849	80.1911	152.174	157.994	47.7331	128.474	179.902	202.015	72.239	73.2761	77.0657	31.0886	39.102	166.66	76.2256	85.6664	34.7655	189.78	79.7054	40.478	42.5365	66.7644	136.277
Akr1c19	0	0	223.117	0	0	0	0	0	0	0	0	0	0	0	0	0	0	0	0	0	0	0	0	0	0	0	0	0	0	0	0	0	0	0	0	0	0	0	0	0	0	0	0	0	0	0	0	0	0
Akr1e2	0	85.4589	174.214	57.9519	169.414	181.608	35.8285	103.925	64.5611	73.967	116.621	167.933	79.778	39.5821	89.5934	153.622	169.331	201.052	29.2802	133.992	77.8367	146.765	106.569	127.731	0	85.9241	70.6909	112.623	93.6368	125.29	96.8548	65.2162	105.35	62.51	137.242	62.8681	35.2097	27.6112	173.536	68.8364	132.889	90.5457	92.8527	22.7891	28.0832	34.2316	90.4989	54.9466	79.5917
Akr7a2	99.5379	259.129	465.22	455.192	320.114	311.97	196.406	137.451	258.249	282.222	219.099	190.641	142.733	104.727	204.333	223.616	258.586	294.791	206.633	254.644	86.8743	121.099	150.281	171.18	43.0497	43.6935	165.099	171.276	238.595	228.601	127.774	142.342	201.415	144.588	181.738	202.923	161.952	44.9595	133.071	149.748	183.686	229.961	133.84	200.022	135.886	175.744	226.261	240.009	310.015
Akt1	0	0	0	0	0	0	0	33.9906	0	0	53.6591	55.7404	70.6031	91.4202	128.213	86.2771	103.321	86.7013	25.1886	0	77.8245	226.378	123.69	43.3354	0	0	49.7133	58.1914	0	0	58.2612	56.2089	0	6.99754	0	19.5696	0	0	0	0	31.0021	84.9728	0	0	41.7049	92.7567	0	80.1674	0
Akt1s1	0	0	0	0	29.7583	118.13	0	0	0	0	27.2147	20.4731	0	0	0	0	22.3484	18.2878	0	0	0	0	31.824	36.5573	0	0	63.1908	24.038	39.9261	0	16.9306	0	0	0	20.8229	14.2246	0	0	0	0	15.7614	16.6466	0	15.5213	18.0487	14.8973	0	18.361	41.565
Akt2	0	0	0	0	0	75.2834	0	0	0	0	36.7236	0	17.5361	0	0	0	11.3336	40.0528	20.876	0	0	30.796	10.3274	54.5869	0	0	0	0	35.8701	0	0	0	0	51.3289	0	0	0	0	0	0	0	0	57.2657	0	0	0	0	0	0
Akt3	0	0	0	0	0	0	0	0	0	0	0	0	0	0	0	0	0	0	0	0	0	0	0	0	0	0	0	0	0	0	0	0	0	0	0	0	0	0	0	0	0	0	0	0	0	0	0	0	149.037
Alad	217.965	373.969	120.812	58.7145	292.629	224.958	193.496	96.1569	178.582	209.784	297.185	348.407	144.359	341.574	116.449	158.887	296.646	262.161	321.455	117.965	156.601	138.551	294.021	221.66	0	71.4055	135.591	104.179	213.151	118.734	140.935	206.994	245.256	229.013	167.554	177.016	274.957	270.961	894.572	1041.87	604.43	614.159	66.592	61.5	51.7429	32.4494	89.3532	75.3439	221.17
Alas1	0	0	0	0	0	0	0	0	0	0	0	0	0	0	0	0	0	0	0	0	0	59.1875	0	0	0	0	0	0	0	0	0	0	0	0	0	0	0	0	0	0	0	30.2924	125.476	108.248	113.838	89.3027	75.6663	95.7054	0
Alb	12031.7	659.885	1021.45	1307.28	1466.73	1091.25	685.901	642.178	460	570.22	355.015	388.675	2729.2	7056.26	314.92	318.665	300.493	458.222	231.205	422.306	112.291	234.515	150.888	159.463	232.712	153.431	249.422	327.201	346.492	335.344	171.895	133.393	254.355	95.149	159.454	232.041	155.644	107.7	158.111	282.816	213.229	91.9938	82.1351	183.983	162.381	135.349	180.447	172.159	724.911
Alcam	129.252	170.25	210.12	179.458	120.766	85.2481	0	0	0	80.7401	54.6327	23.3863	41.4061	31.1128	66.7879	68.0883	65.6464	35.7667	43.4503	24.1829	57.2935	0	37.4171	45.3551	0	37.6036	0	0	0	0	0	9.86841	120.495	0	0	0	0	0	0	0	0	0	0	51.0431	46.3716	26.586	77.0513	33.5307	166.849
Aldh16a1	0	0	0	0	118.85	121.04	226.283	213.768	92.8355	154.807	282.482	249.83	34.8807	106.348	75.9539	109.218	185.233	150.478	146.714	173.632	83.9262	20.491	246.224	186.142	0	92.883	165.201	145.307	184.127	121.684	96.1428	0	47.705	181.238	170.535	236.288	112.229	55.7014	79.2471	0	154.453	222.575	139.449	46.4743	56.9483	184.321	91.9148	117.286	48.4993
Aldh18a1	0	0	176.217	0	239.836	211.884	244.269	225.563	178.513	180.78	224.196	189.995	130.716	135.342	304.314	308.734	254.273	330.102	302.551	480.351	420.008	443.378	192.44	291.367	42.356	0	341.825	318.57	213.312	263.421	383.695	349.071	416.491	346.948	391.218	361.407	617.821	681.356	652.918	674.279	647.415	742.145	496.003	367.992	359.658	415.309	418.811	364.577	216.506
Aldh1a1	405.205	851.789	674.223	1409.39	906.953	1123.59	789.384	762.991	828.883	936.623	570.492	481.1	0	0	193.566	142.696	170.964	165.123	0	0	0	0	0	0	0	0	0	0	0	0	81.1608	217.535	52.5554	52.1121	33.3408	0	394.303	309.093	455.028	406.632	520.363	528.751	0	0	0	0	0	0	1799.47
Aldh1a7	0	0	0	0	0	0	0	0	0	0	0	0	0	0	0	0	0	0	0	0	0	0	0	0	0	0	0	0	0	0	0	0	0	0	0	11.133	45.3262	0	0	0	45.7206	32.3334	0	0	0	0	0	0	0
Aldh1b1	69.7105	274.89	255.089	103.623	231.484	500.961	102.775	64.6678	219.78	99.9114	194.616	94.3655	105.92	124.565	227.772	144.754	199.522	232.841	101.963	214.693	197.084	129.34	267.143	150.343	234.763	255.901	375.263	302.533	218.338	335.576	70.5084	103.432	218.052	110.958	139.719	177.337	0	49.7029	0	0	7.96793	0	201.193	196.088	175.688	190.51	300.452	200.395	234.308
Aldh1l1	136.092	329.802	496.901	0	373.89	460.102	98.9708	222.945	280.852	141.103	310.267	254.144	144.027	186.346	166.277	169.021	254.825	210.192	102.771	92.2783	179.821	125.25	157.695	144.924	0	0	0	0	0	0	68.8006	144.438	262.24	41.9188	30.0859	12.2881	0	0	0	0	0	0	0	36.0055	92.1704	20.2895	0	11.4693	460.586
Aldh2	3929.74	4778.58	6901.85	4517.91	3321.34	3848.66	3553.05	3813.41	3844.61	3554.44	3414.5	3351.01	4604.75	3143.65	3853.37	3789.62	3069.42	2914.37	2854.31	2977.89	2185.56	3254.1	3204.7	3282.68	1790.37	1871.73	1762.89	1910.96	2381.59	1966.3	2205.18	2429.71	4049.08	2178.44	3321.29	3781.25	1392.68	1677.53	2499.55	2720.03	1823.96	2021.75	1765.27	2464.66	2457.38	1845	2527.68	2056.16	3067.25
Aldh3a1	0	0	0	0	0	0	0	0	0	0	0	0	0	0	0	0	0	0	0	88.9361	0	0	0	0	0	0	0	0	0	0	0	0	0	0	0	0	0	0	0	0	0	0	0	0	0	0	0	0	0
Aldh3a2	0	0	54.0464	0	119.428	144.464	0	89.1576	136.629	126.614	102.636	119.767	82.9438	64.1684	104.905	73.4316	181.987	125.732	22.8604	0	0	0	266.982	178.114	0	0	68.4225	154.351	96.2149	92.8312	68.6323	129.461	58.8179	56.4809	134.764	137.694	0	0	106.037	154.814	134.537	118.643	25.8211	49.3495	30.9825	46.3444	0	96.6448	84.4396
Aldh3b1	0	0	0	0	0	0	0	0	0	0	0	11.7861	0	0	29.5051	0	0	0	0	0	0	0	18.2267	0	0	0	0	0	0	0	0	0	0	0	0	0	0	0	0	0	0	0	0	0	0	0	0	0	0
Aldh3b2	0	0	0	0	0	0	0	0	0	0	0	0	0	0	0	0	0	0	0	0	0	0	0	0	0	0	0	0	0	0	0	0	0	0	0	0	0	0	0	0	0	0	11.0358	0	0	0	0	0	0
Aldh3b3	0	0	0	0	0	0	0	0	0	0	0	0	0	0	0	0	0	13.9271	0	0	0	0	0	0	0	0	0	0	0	0	0	0	0	0	0	0	0	0	0	0	0	0	0	0	0	0	0	0	0
Aldh4a1	53.6353	88.8012	297.649	206.984	199.116	167.306	34.144	200.799	43.2405	65.1431	84.1599	112.382	31.7495	45.4508	112.743	121.981	126.897	108.734	109.871	23.3062	111.869	68.8557	139.126	102.915	0	0	15.0354	25.629	81.3052	0	35.1201	39.2013	53.4187	63.2376	152.292	134.127	59.19	158.729	153.448	197.054	177.735	146.577	58.0519	114.162	213.092	66.2571	122.252	142.129	0
Aldh5a1	19.3402	0	89.9497	0	173.187	176.534	46.4865	24.9066	33.1924	60.2261	29.5095	73.2906	29.1346	16.7856	49.5973	75.363	72.5766	90.6699	39.0862	36.3437	24.0323	17.9776	32.8164	22.4318	0	0	4.36317	0	0	9.06749	40.3957	19.2047	41.5143	48.7205	4.63609	47.5862	0	0	0	0	0	0	0	0	47.5424	3.05396	47.3128	20.6377	178.48
Aldh6a1	568.585	498.136	562.693	555.931	661.955	658.319	214.465	371.307	258.455	170.253	400.841	387.151	315.432	223.649	275.69	396.918	268.219	448.727	173.549	236.152	215.101	194.688	346.311	185.624	160.944	51.9167	126.875	112.045	208.751	189.027	123.036	142.473	175.658	116.382	245.741	363.399	112.129	73.4836	0	0	52.3469	157.172	134.429	68.3881	109.872	99.3682	209.038	115.306	488.057
Aldh7a1	168.353	591.757	487.974	97.2879	605.539	571.37	123.923	162.246	169.274	114.07	380.918	320.161	207.06	177.307	117.731	121.134	224.598	226.236	121.338	77.3159	45.3668	28.4327	211.418	201.318	31.7944	51.3673	225.668	270.037	312.997	387.65	76.3324	81.5053	131.599	123.328	145.169	104.668	82.3757	27.1469	28.4614	0	85.3883	70.5797	69.7858	29.0911	42.0842	63.3373	0	129.44	401.549
Aldh9a1	504.555	914.982	633.19	421.672	641.58	660.545	550.243	697.792	696.167	541.379	316.185	304.784	447.863	377.288	407.425	440.814	260.631	268.594	261.151	469.701	196.168	351.917	242.82	203.417	289.954	466.725	284.048	245.533	329.427	274.874	361.707	425.392	469.876	532.943	342.854	383.424	493.497	518.504	675.845	510.345	205.118	266.019	481.744	239.37	283.492	346.441	399.801	198.728	414.517
Aldoa	6152.3	3167.2	2242.74	3630.83	2367.78	2736.03	2228.21	2204.3	2536.95	1979.14	1811.83	1632.41	2375.8	2856	1924.61	2088.27	1405.03	1533.04	1597.86	1786	1993.16	1800.24	1594.09	1488.57	1847.14	1560.07	887.327	1007.08	1142.19	1221.38	1797.47	1316.03	1482.44	1973.87	973.622	1261.96	2308.07	2272.24	1651.47	1523.97	1177.53	1207.46	2359.15	1561.47	1999.97	1684.68	2406.28	1518.84	1598.74
Aldoart1	0	0	0	0	0	0	0	0	0	0	44.3536	0	0	0	0	0	0	0	0	0	0	0	0	0	0	0	0	0	0	0	0	0	27.356	0	0	0	0	0	0	0	0	0	15.8341	0	0	0	0	16.5191	0
Aldoc	186.874	192.929	227.994	0	219.242	274.845	90.6982	82.6618	163.963	133.178	143.774	138.25	135.724	221.093	85.7184	93.629	154.573	114.638	109.36	25.602	66.2781	80.6737	109.76	95.291	0	0	14.7006	65.6755	0	0	0	77.6042	11.4017	50.7917	0	0	0	0	0	0	0	0	0	0	0	0	0	0	291.686
Alg1	0	0	0	0	0	0	0	0	0	0	0	0	0	0	0	0	0	0	0	0	0	0	0	0	0	0	0	0	0	0	0	0	0	0	0	0	0	0	0	0	0	0	60.6736	0	35.8193	0	0	6.77027	0
Alg12	0	0	0	0	0	0	0	0	0	0	0	0	0	0	0	0	0	0	0	0	0	0	0	0	0	0	0	0	0	0	0	0	0	0	0	0	0	0	0	0	0	0	0	0	0	0	0	7.03351	0
Alg13	0	0	0	0	0	0	0	0	37.8702	0	0	8.31183	0	0	26.232	17.219	11.7704	25.0219	0	0	0	0	0	6.43509	0	0	0	0	0	0	0	0	15.4361	0	0	0	0	0	0	0	0	0	0	0	0	0	0	0	0
Alg14	0	0	0	0	0	0	0	0	0	0	0	0	0	0	0	0	3.53718	0	0	0	0	0	16.8625	0	0	0	0	0	0	0	0	0	0	0	0	0	0	0	0	0	0	0	0	0	0	0	0	0	0
Alg3	0	0	0	0	0	0	0	0	0	0	0	0	0	0	0	0	0	0	0	0	0	0	0	0	0	0	0	0	0	0	0	9.48585	0	0	0	0	0	0	0	249.758	0	0	0	0	0	0	0	0	0
Alg5	0	0	0	0	0	0	0	0	0	0	9.89269	13.2467	0	0	0	0	74.4248	82.2899	0	0	0	0	28.5144	44.5038	0	0	3.90283	9.25941	120.896	38.402	0	0	0	0	58.7134	54.0781	0	0	0	0	51.9	70.2202	0	18.7156	46.6124	47.6157	0	76.0721	5.65081
Alg9	0	0	0	0	0	0	0	0	0	0	0	0	0	0	0	0	0	0	0	0	0	0	0	0	0	0	0	0	0	0	0	0	0	0	0	0	0	0	0	0	0	0	0	0	0	0	0	13.1636	0
Alkbh1	0	0	0	0	0	0	0	0	0	0	0	0	0	0	0	0	0	0	0	0	0	44.0041	0	0	0	0	0	0	0	0	0	0	0	0	0	0	0	0	0	0	0	0	0	0	0	0	0	0	0
Alkbh2	0	0	0	0	0	0	0	0	0	0	0	0	0	0	0	0	0	0	0	0	0	0	0	0	0	0	0	0	0	0	0	0	0	0	0	0	0	0	0	0	0	0	0	0	0	0	12.322	0	0
Alkbh3	0	0	0	0	0	43.548	0	0	19.0356	17.6331	15.1791	36.9028	37.3563	10.8947	34.2716	19.9348	33.9097	48.2716	60.1807	51.3987	0	81.0448	42.1985	27.0929	0	0	42.2814	36.0392	0	4.11787	41.2355	97.6441	0	37.6468	39.5143	33.1599	29.5666	0	0	0	37.4398	63.0692	18.077	36.2923	65.344	33.2185	29.492	39.7226	62.7458
Alkbh4	0	0	0	0	0	0	0	0	0	0	0	0	0	0	0	0	0	0	0	0	0	0	0	0	0	0	0	0	0	0	0	0	0	0	0	0	0	0	0	0	0	0	0	0	0	7.11173	0	0	0
Alkbh5	0	0	0	0	62.3518	123.935	0	0	0	0	36.7429	78.2831	59.9356	22.5159	68.1316	55.1119	85.6267	107.91	71.2076	0	105.85	58.8022	62.3007	68.6894	36.7097	66.2423	123.462	156.945	179.283	206.131	64.2659	134.455	81.8291	91.7284	32.9193	88.1792	0	0	121.504	145.813	74.0017	89.8175	46.034	47.8229	61.9888	50.3666	77.0298	73.2262	15.551
Alkbh6	0	0	0	0	0	0	0	0	0	0	0	0	0	0	0	0	0	0	0	0	28.3418	57.7981	0	0	0	0	0	0	0	0	0	0	0	0	0	0	0	0	0	0	0	0	0	0	0	0	0	0	0
Alkbh7	0	0	0	0	0	0	0	0	0	0	0	0	4.02078	0	82.4624	45.4795	0	0	0	0	0	43.8079	0	0	0	0	9.247	0	0	0	0	0	0	0	0	6.63832	0	0	0	0	22.2866	32.254	0	0	0	0	92.8209	15.6157	0
Alkbh8	0	0	0	0	0	0	0	0	0	0	0	0	0	0	0	0	0	0	0	0	0	0	0	0	0	0	0	0	0	0	0	0	0	0	0	0	0	0	0	0	81.7759	0	0	22.5726	22.2926	0	0	0	0
Alox12b	0	0	0	0	0	0	0	0	0	0	0	0	0	0	0	0	0	0	0	0	0	0	0	0	0	0	0	48.6415	0	0	0	0	0	0	0	0	0	0	0	0	0	0	0	0	0	0	0	0	0
Alox5	0	0	0	0	0	0	0	0	0	0	0	0	0	0	0	0	0	0	0	0	0	0	0	0	0	0	0	0	0	0	38.9463	0	0	0	0	0	0	0	0	0	0	0	0	0	0	0	0	0	0
Alox5ap	0	0	0	0	91.2959	87.2281	30.7458	48.8296	28.8871	42.002	29.9703	53.0176	0	0	0	0	34.6763	40.2128	22.2123	81.6416	0	0	33.7597	31.7114	0	0	0	0	30.9297	0	0	0	0	40.3742	35.8957	61.1668	0	0	0	0	0	0	53.2067	43.6745	18.158	42.9871	0	32.8656	0
Alpk3	0	0	0	0	0	0	0	0	0	0	0	0	0	0	0	0	0	0	0	0	0	0	0	0	0	0	0	0	0	0	0	0	0	0	0	0	0	0	0	0	0	0	0	0	0	0	0	0	0
Alpl	0	0	0	0	0	0	0	0	0	0	0	0	13.8354	0	0	0	39.7185	0	0	0	0	0	0	0	0	0	58.6324	0	0	0	0	0	0	0	0	0	0	0	0	0	0	0	0	0	0	0	0	0	0
Als2	0	0	0	0	0	0	0	0	0	0	0	0	85.9846	41.1868	78.508	66.8129	24.7229	24.8497	0	0	0	0	0	46.6929	0	0	0	0	0	0	32.4765	0	13.5987	82.2138	0	51.2962	0	0	0	0	0	0	0	35.3734	72.947	40.7518	16.7091	5.05212	0
Alyref	689.447	535.445	251.778	490.939	346.382	595.209	271.426	276.417	224.702	245.216	438.87	412.856	757.72	473.691	211.406	237.318	466.637	417.91	256.99	282.826	170.832	112.49	434.072	518	699.351	422.307	394.941	445.243	395.135	497.941	374.978	280.123	470.63	249.176	627.466	572.024	472.849	346.224	592.284	453.814	479.557	533.872	228.771	321.618	247.593	324.737	227.862	308.059	235.74
Alyref2	0	0	0	0	0	0	0	0	0	0	0	0	8.68214	0	0	0	0	0	0	0	0	0	0	0	0	0	0	0	0	0	0	0	0	0	0	0	0	0	0	0	0	0	0	0	1.38007	8.22948	0	0	0
Amacr	0	0	0	0	17.3555	0	0	0	0	0	14.4678	0	19.6059	0	0	0	0	0	0	0	0	0	14.7866	0	0	0	0	0	0	0	0	0	0	0	0	0	0	0	0	0	0	0	0	0	0	0	0	0	0
Ambra1	0	0	0	0	0	0	0	0	0	0	0	0	0	0	0	0	0	0	0	0	0	0	0	0	0	0	90.6855	0	8.13821	0	14.1649	0	0	0	0	0	0	0	0	0	0	5.5116	0	0	0	0	0	0	0
Amd2	0	0	0	0	0	0	0	0	0	0	0	0	0	0	0	0	0	0	0	0	0	0	0	0	0	0	0	0	0	0	34.2039	71.8781	0	0	0	0	0	0	0	0	39.17	0	60.0438	133.434	0	23.1231	0	48.7554	0
Amdhd2	0	0	0	0	0	0	0	88.2381	66.5191	30.3022	14.2396	16.2873	40.0223	77.9503	167.959	161.728	22.5091	55.9769	0	56.7333	39.8493	23.5841	25.6742	64.186	0	0	46.3323	24.3868	38.0545	55.7312	62.9181	100.744	147.069	50.2706	15.8972	0	0	60.8201	0	26.4385	0	14.768	121.623	26.5278	54.2678	62.0063	112.247	64.0509	34.7968
Amer1	0	0	0	0	0	0	0	0	0	0	0	0	0	0	0	0	0	0	0	0	0	0	0	0	0	0	0	0	0	0	0	0	0	0	31.8133	0	0	0	0	0	0	0	0	0	0	0	0	0	0
Amfr	0	0	0	0	0	0	0	0	0	0	0	0	0	0	0	0	0	0	0	0	0	37.1803	0	49.2679	0	0	0	44.7649	0	0	0	117.484	0	0	0	13.9595	49.625	143.519	61.9414	130.584	86.2085	87.9696	83.2069	79.8598	14.9406	49.2662	54.1406	60.1862	0
Ammecr1	0	0	0	0	0	0	0	0	0	0	0	0	0	0	0	0	0	0	0	0	0	0	0	0	0	0	0	0	0	0	0	0	0	0	0	0	0	27.5888	0	0	99.6099	67.804	0	0	0	0	0	15.4941	0
Ammecr1l	0	0	0	0	0	0	0	0	0	0	0	0	20.1863	0	0	5.7383	0	0	0	0	0	0	0	0	0	6.2443	0	8.0337	96.6921	13.8061	23.1667	18.7571	32.1748	0	0	0	32.1967	30.5571	21.8805	0	7.1774	23.7117	0	0	64.7392	27.2763	29.4697	37.0597	0
Amot	0	0	0	0	373.528	477.247	0	0	0	74.9376	0	0	0	0	145.698	0	0	0	0	0	154.327	0	36.8633	0	0	0	0	0	173.284	0	0	0	0	0	0	0	0	0	0	0	0	0	0	108.614	0	26.0222	0	27.544	0
Ampd2	0	105.069	0	0	282.638	243.34	282.058	279.988	210.553	155.083	288.314	247.75	68.9664	104.459	116.833	139.701	260.016	237.218	210.141	250.548	77.2083	117.363	225.575	212.24	0	0	194.104	143.893	192.137	124.404	157.153	153.297	175.606	126.539	176.935	184.561	93.52	73.1306	144.409	42.8045	94.9247	112.869	295.128	239.664	236.725	300.53	161.387	245.219	465.889
Ampd3	0	0	0	0	157.884	0	0	0	0	0	95.2826	25.3556	0	0	0	0	6.56609	0	0	0	7.57377	0	35.1873	23.3525	0	0	0	0	0	0	0	0	0	0	0	0	0	49.4133	0	0	48.3661	83.0957	0	0	0	0	0	0	212.77
Amy2a5	0	0	0	0	0	20.809	0	0	0	0	0	0	0	0	0	0	0	0	0	0	0	0	0	0	0	0	0	0	0	0	0	0	0	0	0	0	0	0	0	0	0	0	0	0	0	0	0	0	0
Anapc1	0	0	0	0	60.8434	0	0	110.174	134.461	84.8178	126.306	81.7808	65.8692	81.3694	113.319	211.403	214.584	76.3454	137.631	188.456	163.377	217.866	63.9324	94.7547	0	0	167.453	88.3808	195.352	170.437	127.114	294.477	65.1814	155.566	83.9942	170.432	93.0828	0	0	0	89.3098	180.465	182.097	171.405	128.624	157.522	203.026	97.718	59.5321
Anapc10	0	0	0	0	0	0	0	0	0	0	0	0	0	0	0	0	0	0	0	0	0	0	0	0	0	0	0	0	0	0	0	0	0	0	0	0	0	0	0	0	0	0	38.204	0	43.8689	0	0	0	0
Anapc11	0	0	0	0	0	0	0	0	0	0	0	0	0	0	0	0	0	0	0	0	0	0	0	0	0	0	0	0	0	0	0	0	0	59.9737	0	0	0	0	0	0	0	0	0	0	0	0	0	0	0
Anapc13	0	0	0	0	0	0	0	0	0	0	0	0	18.2677	0	0	0	0	0	0	0	0	0	7.62776	0	0	85.0062	0	0	0	0	9.94247	0	11.7333	27.9495	0	0	0	0	0	0	0	11.163	0	0	17.6911	0	46.6314	0	0
Anapc16	0	0	0	0	0	0	0	0	0	0	0	0	0	0	0	0	0	0	0	0	0	0	0	6.67678	0	0	0	0	0	0	0	0	0	0	0	0	0	0	0	0	0	0	0	0	0	0	0	0	0
Anapc2	0	0	0	0	0	0	72.1825	49.8699	21.2719	31.3126	47.3447	117.649	22.254	11.8566	79.5882	56.9083	98.1259	87.0669	61.2694	18.4328	128.419	161.546	81.5183	132.21	0	0	80.1476	96.4288	0	0	115.945	80.6824	17.9579	179.606	50.3239	46.5868	50.4686	56.6339	0	0	62.5044	73.1221	117.928	56.0797	202.768	26.1553	58.2135	56.3519	0
Anapc4	0	0	0	0	0	5.45121	0	0	0	0	28.1697	26.7352	7.83456	0	0	0	65.9223	87.937	20.806	0	0	36.7141	31.2011	55.0151	0	0	9.03985	0	90.8137	0	49.6491	66.2867	85.1721	31.6292	27.8674	42.0985	0	0	0	47.0904	32.3789	63.1379	22.3456	57.0487	48.0713	17.9208	0	71.3715	0
Anapc5	0	0	237.459	0	70.0461	0	0	0	75.154	65.1509	53.8208	35.9851	34.1892	0	103.449	102.017	96.8419	183.318	35.3236	0	178.938	106.911	68.0369	52.5503	0	4.1961	85.9582	56.6739	84.4918	186.045	67.7468	50.3605	87.4894	74.9301	61.3775	63.087	63.127	0	89.965	0	95.8916	135.526	29.2111	198.717	115.511	42.7598	214.954	92.233	0
Anapc7	0	0	0	0	0	0	0	0	0	0	0	18.2781	24.923	0	0	0	23.2846	47.6987	25.6729	0	53.3032	0	28.8448	31.4904	0	0	0	0	0	0	69.1255	82.653	38.7833	69.2644	17.828	0	0	0	0	0	34.1878	70.3194	23.5564	41.3747	72.3463	72.8597	24.2014	106.493	0
Angel2	0	0	0	0	0	0	0	0	0	0	0	8.08132	0	0	0	0	17.0963	13.3252	46.7013	21.6853	41.7949	105.456	22.2671	14.6087	0	0	12.7658	14.1496	49.7229	0	0	0	0	46.5911	0	0	0	0	0	0	21.7121	18.293	61.3212	0	0	0	0	9.60452	0
Angpt1	0	0	0	0	0	0	90.1521	56.7661	18.2485	0	69.7731	49.5748	0	0	0	0	25.9752	71.8524	0	0	73.6675	0	0	0	0	0	0	0	0	0	0	0	0	0	0	0	0	0	0	0	0	0	0	0	0	0	0	0	0
Ank1	0	0	0	0	0	0	0	0	0	0	0	0	0	0	0	0	0	0	0	0	0	0	0	0	0	0	0	0	0	0	0	0	0	0	0	0	165.582	36.1286	259.73	156.328	100.388	87.973	0	0	0	0	0	0	0
Ank2	0	0	0	1701.18	0	0	0	0	0	359.786	0	0	0	0	257.743	0	0	121.112	0	0	0	0	0	0	0	0	0	0	0	0	0	0	0	0	0	184.583	0	0	0	0	0	0	0	0	0	0	0	0	0
Ank3	0	0	0	350.509	0	0	0	0	0	184.949	0	0	0	0	0	0	0	0	300.231	0	0	0	0	0	0	0	0	0	0	0	0	0	179.574	167.856	0	0	0	0	0	0	110.785	0	206.829	237.396	0	0	0	0	0
Ankfy1	0	0	183.711	0	23.895	101.097	108.49	37.7061	149.118	113.972	169.109	133.976	180.785	252.905	281.479	145.664	129.73	160.64	256.995	131.097	137.788	128.295	153.344	138.269	0	0	115.18	140.225	65.5886	108.016	180.255	44.9843	189.082	308.842	159.103	132.417	62.4898	69.4118	9.04935	0	99.5411	150.762	172.823	159.564	171.852	167.015	144.181	122.294	82.1038
Ankhd1	0	0	0	0	225.197	255.657	113.821	256.091	0	179.041	157.26	156.212	81.4369	96.04	133.92	199.221	144.734	223.515	73.4546	254.721	164.888	115.968	126.203	123.035	84.9175	145.809	254.56	148.493	110.199	155.542	133.811	323.184	110.9	142.839	211.41	86.5247	110.439	103.551	88.3058	315.683	191.777	81.3088	388.08	163.512	188.298	215.117	200.181	67.0316	116.586
Ankle2	0	0	0	0	92.0232	110.801	0	0	0	55.4193	67.6378	57.1376	99.0378	82.9436	81.9021	251.155	86.9601	71.7767	116.84	26.6953	138.819	205.701	46.8415	151.142	32.602	133.924	140.04	96.8051	140.753	136.612	206.656	296.629	230.642	155.878	93.1087	107.678	116.87	149.256	85.6664	101.147	197.209	183.09	256.188	182.839	182.209	148.74	365.454	314.472	0
Ankmy2	0	0	0	0	0	0	72.5731	43.2118	28.3737	21.5058	36.4696	13.5978	67.6347	10.0974	44.8975	58.5242	30.642	39.042	25.8933	30.2448	100.43	60.2013	19.9173	15.2046	0	0	53.0292	19.3096	0	14.0309	47.1453	31.2321	0	24.0093	0	7.99977	29.3435	49.1041	0	0	24.0321	44.5902	54.7046	33.7983	48.4993	45.3431	0	26.9517	0
Ankrd10	49.3648	0	0	0	0	0	66.7568	0	112.311	80.1999	88.776	83.4831	86.887	92.5627	135.754	103.821	93.9406	106.912	70.1879	130.196	126.922	168.318	119.974	99.7484	134.867	209.587	76.2471	84.4781	0	10.2008	131.355	105.369	85.5067	109.542	101.467	103.685	61.7557	62.1612	0	0	94.3332	104.368	111.773	108.067	75.4276	75.0492	82.0052	82.4381	0
Ankrd11	0	0	0	0	0	0	0	0	0	0	0	0	0	0	0	0	0	0	0	0	0	0	0	0	0	0	0	40.0648	0	0	0	0	0	0	0	0	0	0	0	0	0	3.02634	0	0	64.1743	0	176.904	1.21031	0
Ankrd13a	129.538	285.586	236.758	0	46.9789	0	175.658	181.533	213.798	207.472	371.477	281.6	237.243	375.624	244.375	230.831	304.843	290.767	285.495	345.879	222.477	171.949	377.882	347.629	92.3971	93.1186	97.1729	150.536	34.1774	81.3933	275.548	462.718	338.272	347.223	218.377	288.588	153.692	139.132	222.219	207.014	183.361	192.067	272.315	258.097	151.945	119.44	111.11	163.387	159.733
Ankrd13d	0	0	0	0	0	0	0	0	0	0	0	0	0	0	0	0	0	0	0	0	0	0	0	0	0	0	0	0	34.5064	0	0	0	0	0	0	0	0	0	0	180.916	0	0	0	0	0	0	0	0	0
Ankrd17	0	0	0	0	0	0	0	0	0	0	46.4223	145.888	246.753	158.9	75.3063	82.6119	48.3194	29.5296	207.832	64.3878	208.945	230.814	200.3	148.761	420.732	410.692	63.2105	169.904	130.107	217.192	263.42	142.044	377.484	239.382	262.746	236.903	247.631	299.336	485.004	482.192	330.614	310.051	210.105	367.903	345.465	190.37	337.52	233.83	93.6451
Ankrd27	0	0	0	0	0	0	0	0	0	0	0	0	0	0	0	0	11.5365	0	0	0	0	0	0	0	0	0	0	0	0	0	0	0	18.0081	55.1877	0	0	0	0	0	0	0	0	0	134.387	0	0	0	86.4409	0
Ankrd28	0	0	0	0	0	0	0	0	0	0	32.0388	36.7373	43.0018	23.1531	196.721	84.2059	62.5897	141.311	76.9951	92.285	207.795	246.29	48.5571	92.4768	0	0	45.6493	39.4681	0	0	71.2347	55.5653	211.043	134.214	42.8033	3.09008	63.0824	0	0	0	33.6287	54.7254	139.309	184.535	128.439	124.784	53.4665	140.114	0
Ankrd34a	0	0	0	0	0	0	0	0	0	0	0	0	0	0	0	0	0	0	0	58.209	0	0	0	0	0	0	0	0	0	0	0	0	0	0	0	0	0	0	0	0	0	0	0	0	0	0	0	0	0
Ankrd36	0	0	0	0	0	0	0	0	0	0	0	0	0	0	0	0	181.477	0	0	0	0	0	0	0	0	0	0	0	0	0	0	0	0	0	0	0	0	0	0	0	0	0	0	0	0	0	0	0	0
Ankrd39	0	0	0	0	0	0	0	0	0	0	0	0	0	0	0	0	0	16.3694	0	0	30.7006	0	0	4.89827	0	0	0	0	0	0	0	0	0	0	0	0	0	0	0	0	0	0	0	0	0	0	0	0	0
Ankrd40	0	0	0	0	0	0	0	0	0	0	0	0	0	0	0	0	0	0	0	0	0	0	0	0	0	0	0	0	0	0	0	0	0	0	0	0	0	0	0	0	0	0	0	69.9593	0	0	0	0	0
Ankrd44	0	0	0	0	0	0	0	0	53.3361	0	0	0	55.1733	0	84.7456	73.6733	36.4906	44.8501	49.6636	139.254	147.167	120.763	76.3095	62.2814	0	55.9177	159.515	190.705	287.494	146.28	112.986	61.8111	95.4613	161.344	10.6446	33.2005	0	0	0	0	0	0	304.77	278.242	329.66	225.935	192.92	157.107	0
Ankrd46	0	0	0	0	0	0	0	0	0	0	0	0	26.2447	0	0	16.4953	0	0	37.4766	0	0	13.628	0	6.02806	0	0	0	0	0	0	0	0	23.2488	0	0	0	0	0	0	0	0	0	0	0	0	0	103.453	35.7856	0
Ankrd49	0	0	0	0	0	0	0	0	0	6.70355	0	4.76516	0	0	9.69218	14.8188	0	0	0	0	17.5107	0	0	0	0	0	0	0	0	0	6.1127	0	0	0	0	0	0	0	0	0	0	0	0	0	32.2461	34.3368	0	7.70907	0
Ankrd52	0	0	0	0	0	0	0	0	0	0	0	0	0	0	0	0	0	0	0	0	0	49.2732	0	0	0	0	14.4829	0	0	0	0	36.2379	0	10.228	0	0	0	17.3706	0	0	34.9322	56.1873	37.7481	41.0649	90.5565	33.4314	0	50.1471	0
Ankrd54	0	0	0	0	0	0	0	0	0	0	0	0	160.466	0	15.7878	21.0281	0	0	0	0	28.0505	9.15038	0	0	0	0	0	0	0	0	0	0	0	0	0	0	0	0	0	0	0	20.1638	0	0	0	0	0	0	0
Ankrd9	0	0	0	0	0	0	0	0	0	0	0	0	0	0	0	0	0	0	0	0	0	0	0	0	0	0	0	0	0	0	0	0	0	0	0	0	0	0	0	0	0	0	0	0	0	0	0	2.88806	0
Anks1	0	0	0	0	52.0715	174.04	75.4452	75.7967	144.556	130.695	125.769	101.851	125.04	195.116	138.189	141.9	156.072	125.207	269.86	146.819	208.282	121.446	140.759	122.118	256.897	174.1	255.258	193.548	160.128	175.872	155.553	240.529	76.3982	224.248	55.2947	95.8337	61.0243	0	0	23.3811	107.882	127.402	373.246	76.2309	96.99	65.2946	63.1719	66.4763	184.049
Anks6	0	0	0	0	0	0	0	0	0	0	0	0	0	0	0	0	0	0	0	0	0	0	0	0	0	0	0	0	103.71	0	0	0	0	0	0	0	0	0	0	0	0	0	0	0	0	0	0	0	102.494
Ankzf1	0	0	0	0	0	0	0	0	0	0	0	0	0	0	0	0	3.69143	0	0	0	0	0	0	0	0	0	0	0	0	0	0	0	0	0	0	0	0	0	0	0	0	0	0	0	0	0	0	27.2657	0
Anln	0	0	0	0	0	0	0	0	0	0	0	0	0	0	0	0	0	0	0	0	148.295	260.637	16.3371	0	95.4293	152.931	94.2334	60.3526	39.1433	0	211.577	260.05	177.077	48.547	30.6374	0	181.627	244.576	79.519	10.6346	103.54	91.3086	15.3387	54.6063	89.0001	25.4074	111.234	53.3251	0
Ano10	0	0	0	0	0	228.47	0	0	0	0	0	0	21.7203	0	0	0	32.4879	8.91897	0	0	29.2786	15.1084	58.3246	34.0832	0	0	0	0	0	0	0	0	0	0	0	0	0	0	0	0	0	0	0	20.0644	82.5373	0	0	0	0
Ano6	0	0	236.056	0	0	0	0	0	166.361	58.2006	86.4729	111.488	3.58218	0	134.033	102.289	0	0	0	0	58.0669	164.052	34.861	34.1677	0	0	0	0	0	0	57.6318	0	0	21.6787	55.4875	27.7511	0	0	0	0	0	0	0	0	0	0	0	0	0
Anp32a	1543.9	902.307	782.612	1269.8	837.373	857.271	714.943	1183.14	554.67	634.053	899.906	710.916	1002.11	565.371	680.097	734.803	445.795	563.537	622.547	722.445	950.767	732.002	727.797	676.544	523.796	579.916	395.696	431.855	503.459	461.535	367.375	479.38	510.945	573.585	324.77	249.596	334.406	370.519	222.647	218.58	326.328	276.092	481.705	473.401	480.83	355.54	153.824	356.316	452.713
Anp32b	1170.23	1906.84	1069.42	2207.04	1384.04	1311.75	1366.85	1296.42	1511.17	1383.26	813.43	1036.89	1402.96	1546.81	1198.13	925.151	1178.5	1209.22	989.061	1235.95	462.112	1296.04	1189.1	1113.3	1024.46	1061.94	1344.72	1141.09	1332.91	1154.88	788.253	590.436	770.049	961.421	904.837	946.155	926.77	764.017	739.226	670.205	834.897	912.559	971.404	1187.94	1065.59	950.054	748.33	1155.52	1004.83
Anp32e	1205.33	936.967	875.29	1441.86	616.121	602.282	1044.33	582.383	552.638	748.056	573.646	519.429	1069.03	642.298	613.161	713.702	567.4	526.915	492.467	492.466	826.856	451.016	555.295	381.158	804.431	563.789	568.568	602.336	575.312	514.56	395.496	531.822	952.646	421.269	397.24	451.749	526.932	507.232	908.291	1048.98	652.117	587.885	582.387	257.156	382.612	479.895	488.766	626.487	398.239
Anpep	289.768	0	0	68.3978	154.798	232.815	0	0	47.9831	47.7442	76.7589	81.5808	36.3556	0	131.908	116.809	40.053	95.0992	0	0	0	91.6471	0	0	0	0	0	0	0	0	0	0	0	0	0	0	0	0	0	0	0	0	0	0	0	0	0	0	44.8813
Antkmt	0	0	0	0	0	0	0	0	0	0	0	0	0	0	0	0	0	0	0	0	0	0	5.6836	0	0	0	7.00194	0	0	0	0	0	0	0	16.3293	14.079	0	0	0	0	5.8807	19.1012	0	0	0	9.43723	0	27.9726	0
Anxa1	3836.33	1396.47	1434.86	2341.04	943.828	952.795	1431.48	1275.31	1445.65	1316.21	1244.56	1264.21	1348.31	3059.76	1745.83	1865.32	1191.29	1141.25	951.416	1402.1	1872.67	1370.5	1122.68	1235.57	1049.46	943.881	557.978	575.37	588.223	653.5	768.16	580.604	1202.53	759.905	899.88	812.856	383.538	295.814	415.126	418.211	197.596	224.671	1253.42	1098.77	1183.95	992.467	1807.96	1282.94	1311.27
Anxa11	362.43	551.906	552.997	1000.08	444.636	584.334	636.907	551.695	694.811	642.531	373.664	372.77	401.584	454.302	529.405	462.384	453.361	416.78	470.152	506.459	536.244	552.466	365.205	400.753	548.202	439.179	301.141	334.031	244.387	270.031	285.644	471.403	470.003	483.269	349.757	327.441	461.898	449.102	407.009	161.38	221.074	264.509	284.169	162.869	290.338	135.694	217.895	235.801	549.202
Anxa2	81.0256	542.799	570.956	782.353	247.88	204.361	528.782	346.098	441.069	288.859	235.258	179.7	306.66	329.234	400.619	411.802	248.321	276.4	501.567	813.843	654.435	607.176	341.451	367.875	161.693	195.158	30.3243	47.844	23.0779	89.6861	468.85	426.565	467.96	585.911	305.15	277.306	146.224	155.624	119.311	154.35	71.6693	94.9034	647.689	408.513	482.308	548.789	613.418	227.043	56.1631
Anxa3	34.4219	83.0932	0	0	82.8203	0	0	0	36.2054	16.8551	0	0	150.048	164.722	67.9095	49.9423	47.6052	30.1142	173.688	116.694	158.011	131.816	47.5425	78.3535	126.856	0	39.965	0	12.3434	0	189.851	162.711	216.015	218.113	374.713	410.74	0	0	0	0	0	0	876.919	738.465	587.231	738.606	718.957	813.661	0
Anxa4	588.53	1292.85	1090.2	1384.54	619.564	546.244	412.746	452.758	530.475	714.772	590.119	337.929	332.839	524.434	397.131	549.061	499.763	492.419	205.421	335.417	540.695	442.468	401.612	389.407	239.818	90.5329	189.636	144.155	162.761	246.803	264.121	289.988	435.338	245.184	238.888	194.015	124.224	465.835	310.942	228.734	160.044	150.728	86.2816	129.903	140.997	116.905	100.225	142.42	477.817
Anxa5	3502.76	2179.14	2282.79	2759.46	2321.06	2414.27	1522.11	1626.78	1267.97	1693.8	1661.27	1580.57	841.959	1109.57	1268.92	1502.71	1230.63	1540.33	579.516	1081.3	1011.06	581.245	1238.14	1440.53	275.863	228.043	267.968	273.674	355.89	336.882	521.308	369.706	698.828	679.662	679.334	713.228	239.874	280.647	600.117	674.543	288.682	316.753	532.98	380.432	324.841	501.08	423.241	419.115	2076
Anxa6	1388.92	1258.18	1035.22	2471.17	1268.33	1355.88	809.32	844.133	1067.86	1063.76	815.344	915.963	1346.33	1279.29	1320.4	1160.97	989.052	1057.23	1032.05	1408.86	965.79	1066.01	1138.18	1028.53	679.233	887.212	801.37	988.896	718.168	739.576	678.944	507.909	582.6	736.745	809.31	642.942	289.109	410.038	141.253	187.139	191.428	276.649	718.263	566.411	360.501	502.318	372.697	536.459	167.718
Anxa7	493.123	307.874	250.094	434.695	279.68	274.752	215.386	301.902	300.56	274.285	219.654	397.17	404.223	195.365	272.772	330.988	334.338	372.644	154.569	329.584	348.112	184.234	195.881	287.53	243.889	137.379	166.683	139.579	169.985	197.033	223.51	220.775	289.997	171.224	201.23	322.831	349.718	284.64	506.996	316.642	345.924	545.652	133.826	213.576	209.061	100.485	163.265	184.015	323.363
Ap1b1	182.14	307.841	366.956	32.5269	264.101	485.789	512.125	444.161	610.888	617.149	380.854	424.591	301.893	275.278	512.099	470.127	434.364	429.023	388.936	707.138	790.016	477.294	356.739	379.755	286.695	637.099	93.3921	151.82	347.444	235.408	586.279	459.213	568.608	480.728	396.609	329.33	536.587	214.971	838.154	622.854	366.84	437.27	501.837	461.512	456.101	501.695	783.481	397.889	294.094
Ap1g1	0	0	0	0	0	31.3863	53.6094	154.371	0	0	35.5429	49.2015	7.97357	27.6037	50.3128	8.21837	58.9214	55.1901	54.4892	153.044	86.2542	0	29.7465	32.1521	59.325	26.8885	36.5001	21.1763	0	0	41.9416	127.547	0	75.9901	15.417	40.1031	28.4114	92.5748	0	0	43.9908	53.3305	123.311	48.4368	34.186	118.039	0	81.3771	29.8895
Ap1g2	0	0	0	0	0	0	0	0	41.1565	0	18.1162	19.4592	37.796	14.083	0	0	7.595	0	80.9173	0	67.9468	45.9295	33.0796	20.8717	0	0	21.5448	13.7853	77.4025	40.4707	108.014	94.0748	37.3669	52.9818	24.0524	14.3672	112.847	81.0872	0	0	59.4099	125.534	105.555	89.1494	63.5977	52.6801	37.9503	59.0236	64.2963
Ap1m1	15.0126	101.464	65.2973	175.502	225.007	197.951	106.852	210.903	393.12	246.257	155.267	98.4865	69.3585	105.117	255.646	356.225	118.714	226.911	68.813	237.218	181.714	184.204	180.474	123.753	24.003	37.1425	152.668	169.86	127.337	208.647	163.963	96.1457	164.11	120.845	208.052	185.527	121.219	143.075	202.728	86.0125	193.799	334.942	166.578	186.437	249.999	147.049	302.669	128.935	116.136
Ap1s1	0	53.6343	133.198	42.1197	36.0862	48.1432	110.852	73.4428	23.5088	38.8702	10.2803	15.4305	14.8519	39.7885	27.8652	30.8294	40.0097	3.69507	55.5216	36.5254	107.698	0	29.9409	19.9508	69.1668	89.171	23.7982	32.0656	40.7007	40.1075	35.4245	21.0832	34.438	19.2087	36.0494	22.6318	74.0106	61.6876	57.3416	44.4049	49.3684	49.0439	42.1794	24.4669	10.86	22.622	15.5858	21.184	42.3129
Ap1s2	0	0	0	0	0	0	0	0	0	0	0	0	8.18021	5.16889	13.0843	12.0308	0	0	0	0	16.346	0	9.85519	15.0034	0	0	0	0	0	0	17.3513	0	11.7957	0	0	4.38031	0	0	0	0	0	0	13.8993	19.953	12.7462	12.8926	19.7488	29.0716	0
Ap2a1	0	78.6393	113.098	0	218.921	159.384	168.596	157.843	134.227	90.2896	168.334	122.55	186.358	106.684	87.8454	98.7404	241.426	256.376	211.157	109.13	53.3564	75.1853	207.405	179.965	0	35.5068	190.828	146.562	185.286	165.889	205.117	263.309	126.844	247.725	153.992	215.905	196.037	178.834	129.692	103.714	258.21	327.127	307.783	309.203	313.161	305.225	179.28	308.097	130.689
Ap2a2	0	62.7502	90.9625	0	297.349	211.392	20.1732	96.2714	224.402	199.566	278.849	238.709	142.223	63.3944	189.408	215.287	422.922	352.729	352.779	244.084	245.033	266.612	288.1	267.771	26.6613	28.7985	230.057	195.749	240.666	329.633	245.56	266.839	206.43	178.528	211.576	125.369	54.7309	93.6495	25.1653	36.1527	156.977	170.624	150.448	134.791	175.7	131.741	172.804	109.354	305.464
Ap2b1	41.3882	216.844	201.028	100.348	471.5	266.236	155.635	223.288	174.126	171.317	184.686	219.178	49.0233	126.58	234.022	244.998	207.303	213.309	241.472	324.189	221.731	168.669	211.976	251.66	105.682	107.188	284.438	350.017	267.186	519.99	267.928	162.93	149.873	259.654	179.235	179.877	216.822	629.321	185.484	152.523	188.931	138.735	179.74	272.187	516.349	255.803	243.352	259.674	658.063
Ap2m1	0	120.315	0	0	111.379	163.596	80.89	73.5251	94.1828	114.487	61.2748	65.4342	27.6927	43.9271	78.0265	117.298	142.383	127.599	106.75	111.986	113.386	177.638	116.079	108.886	122.475	51.3905	74.5041	78.1809	98.3128	115.543	106.499	121.746	0	160.954	115.743	96.4503	63.0968	55.8061	84.6482	41.6494	49.6918	84.2465	133.64	360.217	415.478	111.314	41.5494	129.596	119.128
Ap2s1	0	0	0	0	0	0	0	0	0	0	0	0	0	0	0	0	0	0	0	22.9441	0	0	0	0	0	0	0	0	0	0	0	0	0	0	0	0	0	0	0	0	0	0	0	0	0	21.0727	0	0	0
Ap3b1	0	0	0	0	97.2896	84.5583	65.1015	59.3356	75.4848	21.83	123.51	93.8228	0	33.9062	123.312	50.0436	125.045	134.078	114.351	105.678	97.5627	0	95.2609	129.803	0	0	67.768	46.3484	111.889	63.3414	61.5173	71.9626	236.789	159.487	90.9943	110.866	137.974	118.74	0	0	115.467	111.975	252.756	115.372	86.1901	158.956	138.939	123.267	17.5005
Ap3d1	0	0	0	0	0	56.791	117.905	254.202	0	60.6236	209.063	155.754	17.4257	0	168.946	161.604	60.2468	125.916	141.166	85.2685	183.171	132.885	98.4653	99.1453	0	0	31.6667	56.6602	62.6939	0	165.448	82.5782	147.828	141.799	58.8701	66.831	161.05	89.2711	0	0	92.7736	140.182	272.256	159.956	256.369	210.311	228.07	107.18	0
Ap3m1	0	0	0	0	0	0	0	0	0	0	0	48.1268	13.7745	0	12.9151	19.4667	31.6817	6.97274	0	0	0	0	15.5586	1.86239	0	0	0	0	0	0	14.5813	0	0	0	47.5338	0	0	0	0	0	0	29.4769	58.4412	127.324	60.7118	25.3294	24.1646	74.9983	0
Ap3s1	0	0	0	0	38.3717	31.8435	0	0	0	0	15.6086	16.0756	24.0303	31.4387	40.4513	28.0985	12.0647	15.963	0	0	17.5094	0	12.582	11.736	0	43.5465	25.5227	18.4204	48.8783	75.2712	38.4752	0	26.9764	22.8573	19.5466	30.3783	32.2288	17.0486	45.5775	24.0134	68.1904	16.574	141.487	45.3139	29.0561	61.3078	92.1518	93.7299	54.085
Ap3s2	0	0	0	0	0	0	0	0	0	0	0	0	0	0	0	0	13.8821	0	0	0	0	0	0	0	0	0	0	0	0	0	0	0	0	0	0	0	0	0	0	0	0	0	0	0	0	0	0	0	0
Ap4b1	0	0	0	0	0	0	0	0	0	0	0	0	0	0	0	0	0	0	0	0	35.9278	38.3093	0	0	0	0	0	0	0	0	0	0	0	0	0	0	0	0	0	0	0	0	0	0	0	0	0	0	0
Ap4s1	0	0	0	0	0	0	0	0	0	0	0	0	0	0	0	0	0	0	0	0	0	0	0	0	0	0	0	0	0	0	0	0	0	0	0	0	0	0	0	0	0	0	16.5472	0	0	0	0	0	0
Ap5b1	0	0	0	0	0	0	0	0	0	0	0	0	0	0	0	0	0	0	0	0	0	0	0	0	0	0	0	0	0	0	0	0	0	0	0	0	0	0	0	0	0	0	0	0	0	0	0	1.85689	0
Ap5m1	0	0	0	0	0	0	0	0	0	0	0	0	0	0	0	0	0	0	0	0	0	0	0	0	0	0	0	0	0	0	0	0	0	0	0	0	0	0	0	0	0	0	0	0	0	0	0	5.57679	0
Ap5z1	0	0	0	0	0	0	0	0	0	0	0	0	0	0	0	0	0	0	0	0	0	0	15.7116	0	0	0	0	0	0	0	0	0	0	0	0	0	0	0	0	0	0	0	0	0	0	0	0	0	0
Apaf1	0	0	0	0	0	0	0	0	80.2681	86.9662	47.8355	20.3728	95.2171	24.7256	89.3168	96.3234	80.6142	57.975	140.896	99.5594	189.208	112.265	199.374	32.9889	0	0	302.804	293.984	29.11	0	102.415	49.4594	111.579	107.595	0	0	0	0	0	0	342.252	62.3071	64.2989	884.083	340.521	151.994	185.906	199.314	0
Apbb1ip	0	0	0	0	0	0	0	10.2941	16.9872	0	114.461	93.0658	30.4421	44.9747	212.794	27.8667	106.382	83.2757	56.4917	46.2475	0	0	73.7031	138.414	72.7051	87.3618	94.278	132.812	186.844	71.0243	54.5885	82.9571	0	65.9443	122.108	78.1797	268.373	173.116	272.015	57.2359	142.855	146.001	87.7026	104.346	138.487	116.235	133.018	108.088	0
Apc	0	0	0	0	0	0	0	0	0	0	0	0	0	0	0	0	0	0	0	0	0	0	0	0	0	0	0	0	0	0	0	0	0	0	0	0	0	0	0	0	0	0	0	0	0	0	0	0	0
Apeh	317.487	408.273	278.384	175.741	194.93	221.495	253.214	145.331	177.128	191.798	371.857	255.43	198.778	177.232	167.914	290.304	222.963	166.87	292.543	160.975	202.167	169.761	182.206	224.639	94.8149	0	138.551	172.163	138.33	220.382	592.971	212.404	122.88	185.891	103.657	122.489	341.257	273.982	391.087	407.908	168.357	186.076	195.846	199.61	169.444	222.139	314.543	180.769	75.9941
Apex1	754.55	1288.33	1216.03	1154.21	1436.35	1715.29	736.814	772.345	871.174	701.617	1647.98	1368.72	874.014	567.467	782.505	711.332	905.556	1086.63	808.227	690.78	1130.55	721.771	949.836	970.124	429.393	643.786	806.697	799.102	726.33	820.903	782.554	607.016	455.618	629.425	730.889	674.375	352.583	499.293	478.414	505.475	494.183	659.488	520.935	528.353	452.139	549.959	453	464.582	1081.82
Api5	215.037	641.739	423.773	704.165	511.88	454.19	611.992	468.08	520.486	454.578	620.082	559.399	542.751	550.75	402.245	527.472	575.574	567.724	338.74	618.649	388.051	403.638	518.772	536.017	756.88	540.965	492.964	553.998	657.079	616.109	379.658	437.461	513.65	583.942	583.204	487.105	422.664	672.297	798.402	653.488	503.905	553.5	393.855	507.103	375.335	568.411	511.785	477.569	812.015
Apip	286.091	0	72.4663	35.1073	91.9739	140.891	82.4568	117.924	59.186	59.2211	133.905	34.5256	142.214	119.052	114.629	82.8877	68.4811	100.882	80.6958	68.0182	30.5505	76.5527	59.6806	89.6924	0	141.493	77.4554	75.5656	56.3579	82.8808	72.6151	138.527	78.0062	161.726	73.2708	51.9085	0	0	0	94.0193	96.6129	101.728	101.24	49.1003	64.3327	88.7692	50.142	58.3642	249.016
Apitd1	0	0	0	0	0	0	0	0	0	0	0	0	0	0	0	0	0	0	0	0	0	0	0	0	0	0	0	5.09858	0	0	0	10.8275	0	0	0	0	0	0	0	0	0	0	0	0	0	14.911	0	0	0
Aplf	0	0	0	0	141.924	115.116	0	0	0	50.8881	0	51.3151	37.5499	0	58.767	46.2558	43.713	37.614	81.9334	0	21.2926	0	51.3556	55.0731	0	0	0	0	0	0	114.469	63.1049	110.205	76.547	0	55.8524	130.067	83.553	270.295	158.253	117.059	123.539	80.1375	109.447	39.5025	8.15506	0	49.5331	9.95838
Aplp2	0	0	0	0	0	0	0	0	0	0	0	0	0	0	0	0	0	0	0	0	0	0	0	0	0	0	0	0	0	0	0	0	0	0	0	0	0	0	0	0	14.3897	49.1092	0	0	0	0	0	0	0
Apmap	158.089	77.0199	162.233	365.729	150.648	80.7574	164.945	198.189	225.823	254.799	83.3998	120.016	38.5077	111.946	90.129	77.9853	101.29	90.171	78.4039	128.57	78.3439	13.1042	101.684	75.1399	140.533	150.928	113.727	99.283	96.4174	90.1981	71.3208	130.083	91.2449	74.2772	111.051	129.884	33.9007	107.571	145.85	109.489	99.2811	148.823	161.957	162.517	197.56	82.718	146.247	128.466	140.693
Apoa1	3354.81	2191.5	1617.42	2547.55	1422.43	2430.42	1792.08	1414.1	1298.43	1023.02	369.876	529.177	686.437	940.428	84.424	216.462	420.631	323.028	110.937	239.297	30.3179	61.4964	205.859	325.813	396.417	220.412	402.732	433.232	1128.38	1978.35	0	107.824	138.299	120.325	0	0	757.282	485.069	542.005	341.862	46.1893	0	0	25.7311	0	57.8754	167.274	40.8358	1093.09
Apoa1bp	301.349	516.89	564.352	689.71	459.876	268.84	135.093	122.563	244.621	257.186	194.237	241.169	371.055	273.028	397.957	301.509	191.204	226.069	276.738	158.139	217.723	114.661	192.996	241.646	307.873	180.978	99.427	99.8569	315.701	190.273	189.416	147.128	194.499	180.595	147.177	146.775	172.372	147.831	128.557	147.761	88.4656	128.19	52.4234	121.394	131.667	115.283	206.754	76.5592	171.885
Apoa2	305.674	0	0	0	0	0	0	0	0	0	0	0	0	0	0	0	123.513	0	0	0	0	0	0	0	0	0	0	0	0	0	0	0	0	0	0	0	0	0	0	0	0	0	0	0	0	0	0	0	0
Apoa4	0	0	0	0	19.8634	0	0	0	0	0	0	0	0	0	11.4825	0	0	0	0	0	0	0	0	0	0	0	0	0	0	0	0	0	0	0	0	0	0	0	0	0	0	0	0	0	0	0	0	0	0
Apob	214.863	0	0	0	253.662	335.733	0	0	0	0	224.412	158.675	0	0	0	0	81.9076	62.7601	0	0	0	0	41.9033	68.3268	0	0	146.557	189.664	242.453	230.032	0	0	0	0	0	0	0	0	0	0	0	0	0	0	0	0	0	0	0
Apobec3	0	0	0	0	0	0	0	0	0	0	46.2461	87.834	116.226	89.0451	112.382	84.6884	82.2356	75.219	151.94	43.1324	87.9495	138.571	63.3654	103.747	0	99.2085	150.138	127.457	123.6	168.82	137.101	59.7483	76.2704	49.8522	159.842	171.887	110.49	121.625	0	0	92.5491	161.188	137.763	118.949	177.392	84.4416	116.305	132.672	175.022
Apobr	0	0	0	0	0	0	0	31.972	86.6089	42.0176	35.05	40.847	36.6228	0	108.621	104.1	0	49.7208	0	129.934	85.4017	0	35.1125	81.3211	0	51.4578	0	0	0	0	66.5518	0	0	0	0	0	0	0	0	0	0	0	0	0	0	0	0	0	0
Apoe	316.216	0	46.703	168.849	209.951	163.041	234.591	189.151	128.184	107.873	100.445	120.41	87.0021	66.708	28.5197	77.8524	56.4486	29.8913	0	0	0	0	0	12.7191	0	0	0	0	0	0	117.529	111.482	46.0474	59.2158	112.847	65.8607	191.761	256.958	135.309	201.539	186.024	154.662	0	30.4826	31.5239	0	0	53.3152	266.246
Apoh	240.56	0	0	0	306.773	260.668	0	0	0	0	80.8045	94.6382	49.7442	13.8525	0	0	85.4959	95.473	0	0	0	0	59.8747	19.9782	0	0	71.8617	66.9631	138.562	155.568	0	0	0	0	0	0	0	0	0	0	0	0	0	0	0	24.4684	0	0	100.154
Apoo	44.5886	105.209	55.9128	0	148.779	80.2725	52.5082	99.0056	51.4896	92.3718	271.698	29.3214	46.912	109.564	29.1386	26.1241	66.4916	51.5728	77.0356	149.952	0	0	50.4004	207.019	124.764	453.47	328.241	65.8707	60.6226	156.974	34.4969	47.1191	50.3008	31.3558	51.2022	44.4037	65.4899	161.402	114.295	42.844	63.4319	57.1853	0	82.5328	45.8541	56.8716	40.3556	26.629	68.3329
Apool	0	136.556	22.1017	0	118.193	212.172	123.973	204.155	100.044	108.684	101.141	136.537	88.3492	86.4592	145.724	123.888	106.359	100.701	171.798	92.5688	67.2514	82.7212	112.026	82.869	128.064	61.6487	157.895	124.326	155.338	191.897	96.0813	118.904	104.558	81.6596	161.698	97.7224	144.196	142.87	159.294	127.037	96.9678	107.76	59.8018	144.989	144.585	83.1643	66.787	56.9071	314.231
App	235.11	0	0	0	0	0	0	0	0	0	0	0	0	0	0	0	0	0	0	0	0	0	0	0	0	0	0	0	0	0	0	0	0	0	0	0	0	0	0	0	0	0	0	0	0	0	0	37.8476	0
Appl1	0	0	241.55	0	74.9075	67.6342	146.181	75.905	173.985	145.274	93.3811	133.464	120.63	144.471	171.699	190.827	195.89	146.302	98.8009	184.468	221.565	200.329	201.087	201.548	154.163	94.1507	147.341	96.015	242.656	162.785	220.904	207.865	343.624	152.555	138.009	155.709	0	0	0	0	53.3972	0	216.003	187.77	206.333	93.8182	158.597	164.106	171.129
Appl2	0	0	0	0	0	0	0	0	44.5785	59.7453	29.7766	36.5984	96.3533	13.946	119.161	134.003	123.41	89.4432	38.2978	31.4744	84.5796	73.0806	41.0501	57.0379	0	0	0	0	0	0	62.5814	39.1465	0	22.0283	4.02309	10.9979	0	0	0	0	0	0	26.9939	0	56.3677	0	0	44.378	0
Aprt	124.079	596.683	506.191	232.574	266.509	243.442	237.669	218.97	145.799	235.002	162.019	213.661	50.9451	86.7574	135.288	163.717	134.214	128.191	188.964	127.236	118.085	313.535	194.551	262.342	172.239	32.0158	126.474	146.93	206.937	132.342	70.5563	161.069	214.599	177.766	72.4814	111.702	0	72.3386	209.303	335.75	69.2627	89.6306	216.485	186.721	155.383	144.462	221.643	200.071	175.664
Aqp1	0	0	0	0	29.0699	42.6657	0	0	0	0	13.7984	23.5868	0	0	0	0	0	0	0	0	0	0	0	0	0	0	0	0	0	0	21.8136	0	0	0	25.2611	44.1592	31.0826	52.9598	0	0	143.1	244.43	0	0	0	0	0	0	24.1389
Aqr	0	132.576	0	0	77.8623	0	294.716	217.551	179.021	107.546	255.332	202.512	89.105	58.761	155.197	142.135	114.064	110.334	54.1176	156.705	183.699	183.209	176.515	114.037	25.1744	0	122.657	66.8659	186.511	244.177	204.574	157.029	118.176	144.993	138.545	184.006	153.506	169.248	120.802	202.817	256.005	187.418	255.295	97.6411	153.621	148.404	125.62	260.726	108.426
Araf	0	0	0	0	0	0	0	0	91.2247	0	0	11.0488	42.8839	0	65.6748	29.4404	22.0017	18.5558	26.143	0	117.809	217.11	2.21929	0	0	0	0	0	0	0	43.9465	85.8338	101.398	0	0	0	0	0	0	0	0	0	94.8567	36.0676	64.1406	0	118.07	0	0
Arap1	86.6844	0	0	0	132.949	129.917	160.934	241.572	162.368	178.745	246.288	187.635	90.1749	40.3303	221.897	325.89	232.403	290.377	287.774	231.662	275.792	195.61	207.667	213.615	58.4236	132.379	290.338	218.824	233.591	220.907	138.777	169.192	263.669	278.69	203.812	265.187	0	0	344.03	92.1623	95.7597	214.562	175.17	119.739	161.142	124.981	273.581	110.371	103.684
Arap3	0	0	0	0	0	0	0	0	0	0	0	0	0	0	0	0	0	0	0	0	0	0	0	0	0	0	0	0	0	0	0	59.3327	0	0	0	0	0	0	0	0	25.9691	57.1763	0	0	0	0	0	0	0
Arcn1	38.0681	173.432	0	66.6081	406.556	318.167	345.875	271.591	236.348	233.953	152.985	181.074	106.96	152.564	191.874	173.758	176.57	189.225	182.403	369.914	104.377	91.6482	137.65	188.137	161.2	156.07	183.365	197.95	200.678	208.052	233.978	185.988	191.267	176.362	136.597	130.187	249.354	128.675	178.894	216.969	228.32	150.51	306.398	235.237	304.031	418.806	324.303	289.97	180.186
Arf1	0	398.036	89.2442	103.545	247.2	265.82	249.712	496.129	98.2632	65.9839	247.637	357.272	0	432.933	0	0	296.912	266.329	189.415	514.167	0	92.2313	273.266	326.138	396.788	336.035	92.8162	166.305	177.344	265.544	308.818	273.298	0	325.461	156.152	193.408	194.927	323.029	140.364	150.982	218.491	136.354	225.292	403.613	549.559	414.352	211.369	214.843	383.352
Arf2	317.561	0	0	0	0	0	0	0	0	0	0	0	0	0	0	0	0	0	0	0	0	0	0	0	0	0	0	0	0	0	0	0	266.737	0	0	0	0	0	0	0	0	0	0	0	0	0	0	0	0
Arf3	0	0	0	0	0	0	0	0	0	0	0	0	212.334	0	217.787	195.685	0	0	0	0	142.633	0	0	0	0	0	0	0	0	0	0	0	0	0	0	0	0	0	0	0	0	0	0	0	0	0	0	0	0
Arf4	0	0	0	0	91.4771	48.1872	87.5765	85.1546	0	0	56.0437	43.5885	34.4459	14.0766	0	0	78.2773	70.0424	102.908	60.3404	0	0	63.3532	29.9001	103.478	398.13	96.0798	78.5743	28.6942	54.6621	57.6377	57.1179	96.8392	86.4161	63.119	42.1917	63.597	162.738	0	137.898	55.2088	73.9235	203.513	132.976	195.912	66.2973	0	75.9698	372.105
Arf5	0	0	0	0	25.1242	0	0	0	0	0	25.9686	35.2338	32.0016	104.756	44.3403	33.2997	4.83053	17.8517	0	0	51.3099	0	64.4768	31.3348	0	0	0	0	34.3393	18.984	58.2597	108.139	0	86.4414	0	0	37.4205	63.5598	0	0	86.0627	9.94226	0	0	0	63.2629	110.256	6.74353	0
Arf6	0	0	40.9762	0	26.1486	78.4593	65.304	0	0	0	60.1273	48.7607	12.6606	0	81.8469	25.219	64.793	108.676	73.9498	0	89.0413	0	113.977	109.229	0	0	83.5196	51.7711	133.763	109.182	20.0842	109.119	33.1622	63.0981	17.7737	0	0	0	0	5.61369	32.0358	10.4332	51.9251	65.9462	55.9183	67.1234	13.161	71.3203	159.893
Arfgap1	30.7689	0	0	640.31	40.4217	95.0776	155.924	597.381	219.39	361.108	197.371	187.082	34.1256	86.5366	226.449	125.431	256.413	154.45	82.6994	81.9199	127.615	160.284	181.999	159.768	181.984	878.439	103.791	130.823	110.501	93.8638	118.252	71.1408	237.083	42.5775	395.047	191.499	239.912	280.78	473.548	98.1648	231.541	174.156	121.476	126.234	223.14	158.979	114.377	94.7413	93.3681
Arfgap2	0	88.5519	108.437	0	237.849	100.971	195.537	147.81	198.824	293.593	221.218	129.074	99.6485	147.443	122.393	111.59	108.39	97.9177	146.958	164.57	104.2	0	138.528	94.6754	346.744	234.501	128.142	207.271	278.382	559.842	167.713	105.085	190.594	166.785	186.877	97.7875	262.127	462.992	196.254	176.311	116.034	133.661	87.3233	90.9921	69.5209	118.805	192.317	128.133	111.628
Arfgap3	0	0	0	0	0	0	0	0	0	0	0	0	11.8991	0	29.7727	90.5722	0	0	0	0	53.4442	98.7014	0	22.1368	0	0	0	0	0	0	79.533	39.9663	70.3396	21.9347	0	0	44.8843	0	0	44.8574	30.8158	42.7137	0	0	149.618	29.294	164.239	47.0014	0
Arfgef1	0	0	0	0	0	0	347.805	112.389	123.74	44.049	22.6396	110.668	71.4993	43.3214	165.653	222.92	89.6082	28.7574	237.965	153.47	329.823	163.372	108.955	26.8501	0	0	0	0	94.0008	0	262.663	138.279	214.143	205.133	76.7383	44.6306	151.304	140	0	0	35.6313	121.414	123.807	253.816	276.473	250.086	251.48	144.606	141.535
Arfgef2	0	0	0	0	207.057	373.947	0	0	0	103.202	151.525	63.1834	73.9514	0	254.072	269.329	81.4473	220.811	0	56.0595	141.583	230.247	107.865	160.269	0	0	213.889	179.89	110.324	124.959	157.36	146.238	0	104.369	102.683	106.123	131.001	214.562	0	174.866	154.177	59.655	173.717	129.251	141.762	121.588	170.294	116.219	0
Arfgef3	0	0	0	0	0	0	0	0	0	0	0	86.069	0	0	0	0	0	0	0	0	0	0	0	0	0	0	0	0	0	0	0	0	0	0	0	14.0528	0	0	0	0	0	0	0	0	0	54.4055	0	0	0
Arfip1	273.826	0	61.8955	0	42.8892	26.9959	134.937	0	83.2481	107.093	45.2186	67.9485	62.5532	533.316	85.3998	99.0102	115.678	91.9617	121.469	162.59	101.386	115.045	106.092	107.532	141.961	202.722	35.5928	143.955	123.701	38.7626	116.416	69.7438	177.881	93.7126	113.906	58.0713	0	0	0	0	82.9251	73.8729	36.5547	73.5888	47.4741	107.58	80.0226	58.9745	256.608
Arfip2	0	0	0	0	0	0	0	0	0	0	0	0	0	0	7.58154	0	0	0	0	0	0	0	10.7224	0	0	0	0	4.05514	0	0	14.8868	0	22.458	0	0	0	11.1812	0	0	0	21.5588	0	0	33.888	36.3126	44.9954	8.48474	21.5227	0
Arfrp1	0	36.2281	0	0	0	0	5.26559	0	0	0	0	0	16.8581	0	59.6374	54.5202	23.3063	14.6737	77.359	77.1802	23.5604	0	0	12.3293	85.724	0	0	0	0	0	36.1184	49.2879	93.5118	38.7993	0	2.62246	50.6046	0	51.0915	197.045	0	7.36664	87.6011	65.4584	89.9064	58.9729	33.3699	18.7026	0
Arg1	78.3092	59.4581	111.729	0	0	0	0	0	0	0	0	0	6.67616	0	0	0	0	0	0	0	0	0	0	0	0	0	0	0	0	0	0	0	0	0	0	0	0	0	117.65	161.746	0	0	0	0	0	0	0	0	0
Arglu1	0	0	0	0	18.1441	137.676	0	0	15.1239	0	36.0735	50.0842	0	0	58.6466	18.1486	30.6175	15.8462	0	0	196.011	0	36.0325	45.9043	129.464	75.7971	39.5241	51.9952	0	54.5836	53.1622	0	0	0	18.137	15.826	51.3309	40.8117	0	0	69.836	29.5035	0	0	0	32.1084	0	15.3498	0
Arhgap1	101.972	139.658	0	249.507	391.143	238.845	179.626	254.884	264.454	252.421	226.902	183.326	107.789	73.0934	208.843	165.655	199.288	143.155	0	233.311	182.937	72.2731	139.474	129.727	135.36	92.5209	126.648	108.3	175.859	208.062	71.3489	47.9237	166.565	26.2194	61.9733	152.589	133.875	146.663	73.2795	64.5798	102.902	79.2054	188.871	150.468	105.513	110.392	149.792	145.561	77.1842
Arhgap11a	0	0	0	0	0	0	0	0	0	0	0	0	0	0	0	0	0	0	0	0	0	47.3298	0	0	0	0	0	38.3741	0	0	0	0	0	0	0	0	0	0	0	0	41.7385	26.5039	0	0	0	0	0	27.6206	0
Arhgap12	0	0	0	0	0	0	0	0	0	0	0	10.711	0	0	0	0	49.2768	0	0	0	0	0	0	0	0	0	0	0	0	0	0	0	0	0	0	0	0	0	0	0	0	0	0	0	0	0	0	0	0
Arhgap15	0	0	0	0	0	0	0	0	0	0	95.744	129.883	75.6146	0	86.6329	148.876	110.829	127.701	200.91	136.991	189.045	162.159	112.436	143.122	0	0	84.7675	86.0956	89.2016	118.303	67.5254	113.647	55.9436	52.5456	176.602	136.875	0	0	0	0	0	16.5186	95.7749	86.3471	119.662	114.628	207.182	148.338	0
Arhgap17	0	0	0	0	79.7527	50.2416	113.038	0	156.334	69.2153	184.311	323.626	99.6181	0	247.033	194.136	288.393	250.589	227.469	70.0694	312.337	646.459	212.895	240.479	101.625	87.6228	254.869	262.279	143.657	149.089	228.359	133.074	142.772	108.782	218.448	246.364	0	0	0	0	103.921	127.958	191.487	255.243	172.685	174.484	170.805	308.382	100.474
Arhgap18	0	0	66.7853	0	88.1296	53.5969	138.62	201.916	92.0627	161.315	130.218	125.564	55.2015	115.433	119.194	123.046	221.181	169.461	197.227	191.339	82.8619	198.983	218.898	206.563	232.351	211.71	123.784	125.024	137.001	194.495	278.689	179.184	164.177	179.228	41.5621	88.3014	0	120.242	282.887	133.905	79.334	69.4262	117.75	75.6329	137.727	146.666	89.4973	110.115	109.316
Arhgap19	0	0	0	0	0	0	0	0	0	0	0	0	0	0	0	0	0	0	0	0	0	0	0	0	0	0	0	0	0	0	0	0	0	0	0	0	0	0	0	0	0	28.5948	0	0	36.747	0	89.7183	30.6755	0
Arhgap21	0	0	0	0	0	0	0	0	0	0	0	0	0	0	0	0	0	0	0	0	0	0	0	0	0	0	0	0	0	0	0	0	0	0	0	0	0	0	0	0	29.6984	0	0	0	0	0	0	0	0
Arhgap25	59.4832	138.193	187.568	220.659	290.17	294.117	345.098	252.57	259.646	250.155	290.497	325.11	129.159	128.231	240.202	289.217	420.534	411.762	162.068	297.603	330.486	286.33	374.294	308.768	355.659	531.438	268.707	217.744	180.487	234.314	125.279	172.834	253.992	130.064	128.567	174.525	15.2298	0	0	0	40.278	24.1581	72.1485	143.103	68.6615	55.9406	0	52.3573	212.156
Arhgap26	0	0	0	0	0	0	0	0	0	0	0	0	0	0	0	0	0	0	0	0	0	105.752	0	0	0	0	0	0	0	0	0	0	0	0	0	0	0	0	0	0	0	0	73.65	0	0	0	28.4458	88.5696	0
Arhgap27	0	0	0	0	0	0	0	0	0	0	0	30.5971	0	12.2347	63.042	43.4114	36.8452	71.1541	58.0804	0	70.3902	116.372	83.3918	103.627	17.8455	19.283	0	18.52	25.7597	0	43.3158	76.9327	67.9201	44.2216	10.9457	15.461	0	0	0	0	0	0	0	0	95.46	0	0	13.6323	0
Arhgap30	0	0	0	0	0	0	68.4873	0	64.7308	59.3987	152.232	95.4675	79.6901	0	139.778	102.939	197.386	140.94	233.962	76.153	453.996	359.196	160.582	232.028	97.4	243.835	241.206	110.785	130.915	135.347	151.265	0	127.404	0	63.6954	93.8326	0	0	0	0	0	0	0	83.7279	43.7248	41.4009	45.6221	64.6471	0
Arhgap32	0	0	0	0	0	0	0	0	0	0	0	0	44.3035	0	133.836	171.392	83.0565	0	0	0	87.0048	250.146	0	50.7704	0	0	0	0	0	0	0	0	0	0	0	0	0	0	0	0	0	0	0	0	0	0	0	0	0
Arhgap4	0	0	84.3849	0	0	12.5	0	102.057	98.7379	177.661	121.15	149.833	104.814	43.7633	332.269	325.071	155.764	240.84	98.588	94.3878	295.427	90.5892	243.249	254.982	86.0407	105.616	169.344	190.632	397.942	275.067	224.745	110.46	147.915	128.963	59.6919	74.275	0	0	0	0	0	13.2928	37.0745	57.5831	90.7659	118.541	115.098	66.5481	0
Arhgap6	0	0	0	0	88.1364	105.254	0	0	0	22.6331	0	6.39476	91.1211	0	110.621	135.838	25.6603	72.3701	21.5872	0	43.6771	96.4576	36.3699	0	0	0	0	0	0	0	12.2818	0	390.396	0	0	0	0	0	0	0	0	0	0	0	0	0	0	0	107.744
Arhgap9	0	0	0	0	0	0	0	0	0	0	0	0	0	0	28.7886	52.2285	28.99	0	107.948	0	134.221	54.0692	36.5564	26.3923	0	0	34.4249	0	0	0	48.9285	22.7006	43.5052	62.2625	0	0	0	0	0	0	0	0	21.0119	0	0	0	17.9791	0	0
Arhgdib	1825.96	1100.73	1274.84	895.112	777.492	729.869	627.347	671.8	674.953	537.361	1181.66	1160.09	2187.48	990.262	1633.14	1165.26	1163.82	1433.74	1359.56	580.971	1455.28	460.98	1483.79	1429.56	744.708	1237.11	989.533	865.969	1246.57	1287.55	613.629	1170.72	1135.34	1295.82	1073.9	968.176	226.753	214.435	450.069	884.662	457.264	490.422	1443.72	1664.32	1864.83	1193.5	1496.23	1048.15	891.329
Arhgef1	0	153.544	179.478	350.356	183.906	286.604	174.822	194.208	347.434	360.227	226.917	270.378	131.213	147.637	485.547	384.323	264.975	234.492	557.986	320.247	577.133	420.488	322.089	317.957	917.56	770.96	345.556	325.866	364.729	303.526	458.769	512.541	460.403	394.948	293.128	241.098	475.664	520.478	159.379	265.302	167.334	244.658	390.546	288.838	285.377	327.657	339.674	236.2	208.469
Arhgef12	0	0	0	0	0	0	0	0	0	0	0	0	0	0	0	0	0	0	0	0	0	0	0	0	0	0	0	0	0	0	0	0	0	0	0	0	0	0	0	0	0	14.4439	0	0	0	0	0	0	0
Arhgef17	0	0	0	0	0	0	0	0	0	0	0	0	0	0	0	0	0	0	0	0	0	0	0	0	0	0	0	0	0	0	0	0	0	0	0	0	0	0	0	0	0	0	0	0	0	0	0	0	0
Arhgef18	0	0	0	0	0	384.72	0	252.008	162.507	270.332	78.8479	101.141	22.5248	27.4998	82.1179	176.325	168.927	231.405	82.341	180.84	140.105	220.999	109.114	88.0223	0	52.6	115.317	310.6	0	0	129.699	0	94.1351	49.5705	63.1801	82.7036	0	0	0	0	0	0	57.558	0	32.1927	83.6324	46.4055	47.2891	0
Arhgef2	34.6688	305.202	739.518	0	536.297	605.316	288.869	189.05	451.233	366.099	627.076	650.458	346.738	290.802	370.14	398.842	545.256	582.855	479.82	398.47	615.561	522.152	406.326	465.651	244.94	204.445	527.406	579.619	366.152	654.408	671.463	517.286	483.151	426.273	847.871	781.86	339.988	286.262	382.293	349.174	483.5	604.075	428.683	333.256	398.191	417.121	167.859	388.864	644.545
Arhgef28	0	0	0	0	0	0	0	0	0	0	0	0	0	0	0	0	0	0	0	0	0	0	0	0	0	0	0	0	0	0	0	0	0	0	0	0	0	0	0	0	0	0	0	0	0	0	0	0	0
Arhgef40	0	0	0	0	0	0	0	0	87.144	0	19.0366	0	0	0	0	46.787	57.516	50.3277	0	0	0	125.626	0	18.4142	0	0	0	0	0	0	0	0	0	0	0	0	0	0	0	0	0	0	0	0	0	0	0	0	0
Arhgef5	0	0	0	0	0	0	0	0	0	0	0	0	0	0	0	0	0	0	0	0	0	247.291	0	0	0	0	0	0	0	0	0	0	0	0	0	0	0	0	0	0	0	0	0	0	0	0	0	0	0
Arhgef6	726.898	327.378	286.167	233.418	216.486	178.304	799.738	339.946	259.456	332.324	272.67	336.984	359.776	275.749	297.69	236.787	337.171	378.366	303.617	322.803	426.958	170.237	389.252	393.403	284.083	368.681	255.061	316.894	221.72	414.359	287.677	142.459	267.213	284.459	319.272	273.88	0	0	0	0	0	0	433.492	161.739	255.367	360.822	183.304	303.37	300.512
Arhgef7	0	0	0	0	256.846	332.758	0	0	83.5053	318.997	189.617	73.457	81.6635	74.1976	293.491	140.615	163.822	150.587	164.842	204.324	251.548	208.9	112.115	169.785	157.303	215.273	61.0364	58.2269	0	0	176.322	433.444	174.68	190.236	92.7921	117.928	404.077	232.958	282.097	301.588	135.406	178.788	68.7445	159.394	93.6698	60.5376	242.116	85.9066	187.755
Arid1a	250.552	284.825	339.082	0	275.411	136.529	326.27	173.018	354.463	472.548	213.339	254.354	411.411	358.271	510.619	471.76	481.515	311.274	930.12	267.065	388.397	455.716	521.079	467.158	453.951	459.221	277.847	390.27	534.364	545.216	614.284	732.971	409.309	545.816	617.843	582.654	566.711	570.936	421.049	434.917	569.961	472.402	295.509	550.236	533.336	654.224	408.733	421.679	398.42
Arid1b	87.0552	0	0	0	197.466	253.447	0	0	204.465	168.92	194.363	157.392	170.976	206.267	188.34	171.048	257.912	301.702	138.258	0	264.227	480.567	206.38	176.546	304.08	229.026	263.112	216.987	119.398	178.72	283.743	266.162	114.304	348.553	285.853	328.633	0	0	0	220.203	229.553	195.961	92.0506	67.4618	126.033	133.643	208.732	145.507	346.212
Arid2	0	0	0	0	0	0	0	0	0	0	35.9998	0	70.1396	44.5316	30.9618	53.2264	10.693	14.2647	0	82.4376	22.2308	155.878	0	0	0	0	0	0	0	0	61.6934	26.8471	51.4227	59.7486	41.0938	0	70.4658	125.713	0	0	53.2274	45.863	31.8781	0	71.2628	80.2692	75.0488	68.0555	0
Arid3a	0	0	0	0	0	0	0	0	0	0	0	0	0	0	0	0	0	0	0	0	0	0	0	0	0	0	0	0	0	0	40.6248	0	0	0	0	0	0	0	0	0	0	0	14.4094	0	0	0	39.9723	38.386	0
Arid4a	987.374	409.551	208.46	835.778	437.075	489.891	333.325	614.922	383.987	377.487	471.302	450.535	336.242	325.175	373.39	420.713	406.584	442.613	163.241	293.114	207.292	201.357	306.747	264.656	302.855	0	0	0	0	0	187.344	67.7214	32.9647	78.965	206.546	158.595	36.7696	0	0	0	38.1859	18.4323	90.6358	177.156	81.3931	111.567	120.589	51.3157	430.383
Arid4b	0	0	0	0	0	0	0	0	0	0	0	0	0	0	168.191	144.342	0	0	0	0	259.027	165.89	71.1853	0	0	0	0	0	0	0	106.451	98.3276	94.3545	36.0368	0	0	0	0	0	0	90.7378	87.0571	0	0	0	0	226.713	37.0961	0
Arid5a	0	0	0	0	0	0	0	0	0	0	0	0	0	0	0	0	0	0	0	0	0	0	10.6617	12.2124	0	0	0	0	0	0	0	0	0	0	0	3.49082	0	0	0	0	0	0	0	0	164.921	0	0	3.48221	0
Arid5b	0	0	0	0	0	0	0	0	0	0	0	0	0	0	0	0	0	0	0	0	0	0	0	0	0	0	0	0	0	0	0	0	0	0	0	0	0	0	0	0	0	0	0	0	47.6308	0	50.7984	0	0
Arih1	62.7912	0	222.11	0	180.761	121.617	154.042	125.98	213.653	185.291	133.787	125.042	80.3004	89.4778	88.4709	152.959	192.618	126.715	115.805	231.428	94.4618	162.298	190.394	139.32	60.5905	149.432	168.72	217.02	225.502	188.629	163.627	89.5957	84.8403	140.903	67.3738	89.1166	213.542	163.064	76.6535	141.834	125.821	91.6731	80.451	97.476	102.682	109.908	187.454	65.678	128.878
Arih2	0	0	0	0	44.8764	21.602	0	0	0	0	150.842	46.7099	106.899	30.4303	133.077	130.387	65.6604	71.8603	76.4255	30.274	91.639	103.566	82.3155	41.7638	0	0	10.3584	49.7089	0	0	281.516	91.127	36.5841	73.2191	121.738	9.73478	40.4326	3.42806	0	0	36.1959	34.4458	116.299	86.9877	15.4179	37.5318	44.4366	54.3719	0
Arl1	0	0	0	0	0	0	0	0	0	0	30.5804	60.4722	0	0	15.1421	12.2686	0	0	0	8.85557	29.6179	19.4118	37.4666	10.3164	0	0	0	0	0	0	17.2503	81.9836	0	12.417	0	2.68346	0	0	0	0	0	0	18.0383	0	0	32.4114	0	27.398	0
Arl11	0	0	0	0	0	0	0	0	0	0	0	0	49.4422	0	0	0	0	0	0	0	0	0	5.07418	7.97191	0	0	0	0	7.17893	0	0	59.518	0	24.4691	0	0	0	0	0	0	0	0	38.7015	7.20548	10.3255	4.28505	0	40.2001	0
Arl13b	0	0	0	0	0	0	0	0	0	0	0	0	0	0	0	0	0	0	0	0	53.6992	0	0	0	0	0	0	0	0	0	0	0	0	0	0	0	0	0	0	0	0	0	0	0	0	0	0	0	0
Arl14ep	0	0	0	0	0	11.7474	0	0	0	0	44.4349	25.2948	0	0	49.4728	58.5301	41.7658	31.3668	0	0	66.1771	125.883	19.4226	9.67144	0	0	23.5278	26.7735	0	0	0	0	24.8784	0	14.8701	73.9608	0	0	0	0	27.819	43.74	0	34.7868	46.0043	35.097	22.9149	10.6938	0
Arl15	0	0	0	0	0	0	0	0	0	0	12.1652	0	0	0	0	0	0	3.91824	0	0	0	0	12.1703	25.5212	0	0	0	0	0	0	0	0	0	7.0904	0	0	0	0	0	0	0	0	0	0	0	13.9798	0	20.5967	0
Arl2	0	0	0	0	0	0	0	0	0	0	19.9322	8.83175	0	0	0	16.7158	10.6197	23.392	18.6518	0	17.9918	0	11.4065	6.37034	25.1772	26.4507	19.7292	14.8962	0	0	23.944	34.3816	33.0305	25.7157	28.0004	18.1424	28.1988	0	51.7654	53.1196	18.2293	12.8802	37.6133	63.9809	38.8196	66.3976	38.1227	31.383	0
Arl2bp	109.641	0	0	0	0	50.7275	0	0	63.7804	71.1167	29.4913	37.2725	19.7827	0	60.7503	55.8611	21.4774	11.4911	31.1188	23.9291	59.1107	14.5473	23.3081	14.3518	0	0	26.7011	20.8323	32.6358	34.3789	64.4201	0	84.0836	8.74006	0	0	0	0	0	0	7.28156	0	0	0	19.5758	3.89166	39.2552	0	0
Arl3	177.064	243.929	92.9232	203.21	340.404	443.807	130.418	163.482	128.729	264.247	221.194	169.732	166.484	145.469	195.257	199.961	189.819	162.768	151.546	139.75	264.295	330.444	164.025	193.732	131.141	120.037	225.04	247.911	231.855	319.961	194.64	89.64	261.859	90.4385	101.448	155.76	78.0729	74.0454	80.8306	61.8623	150.739	100.832	61.3271	47.2028	29.2547	85.9038	74.519	55.3439	293.842
Arl4a	0	0	0	0	0	0	0	0	0	0	0	0	0	0	0	0	0	0	0	0	0	0	0	0	0	0	0	0	0	0	0	0	0	0	0	0	0	0	0	0	0	0	0	0	0	0	0	0	0
Arl6ip1	0	0	0	0	24.2393	32.6992	21.5847	76.4566	30.5214	28.9136	16.1188	29.7975	22.8978	19.4577	26.1955	43.4017	61.582	32.8452	38.372	106.66	16.0904	17.6386	39.0271	22.7801	40.2251	45.9024	36.6424	39.0591	38.0873	34.2155	66.9169	22.8267	46.4386	44.1988	29.2165	56.8474	61.6491	28.5371	0	0	56.171	32.9885	87.0216	70.4358	67.8712	74.1775	29.3933	68.6269	26.2089
Arl6ip4	0	0	0	0	0	0	0	0	0	0	0	17.4722	0	0	36.7869	43.3235	0	63.8828	0	0	20.5049	0	76.8064	60.2283	426.225	94.4696	15.4868	0	0	37.1359	53.1857	29.3001	80.432	151.089	12.5558	57.669	0	0	0	0	0	15.7517	0	0	27.5286	14.4876	89.4491	12.1113	0
Arl6ip5	0	0	0	0	35.2496	56.8139	0	0	0	0	59.5358	48.3612	0	0	17.4791	58.5689	16.8523	37.7956	0	0	43.2962	0	50.0947	34.0519	0	0	42.1025	49.8644	0	0	16.5625	0	0	0	62.9538	43.6642	0	0	0	0	34.5972	27.8578	0	0	0	0	0	24.0875	0
Arl6ip6	0	0	0	0	0	0	0	0	0	0	0	0	0	0	0	0	0	0	0	0	26.6544	0	0	0	0	0	0	0	0	0	0	0	0	0	0	0	0	0	0	0	0	0	0	0	0	0	0	0	0
Arl8a	0	0	0	0	0	0	0	0	0	0	0	0	0	0	0	0	0	0	0	0	0	0	0	0	0	0	0	0	0	0	0	47.8138	0	0	0	0	0	0	0	0	0	0	0	0	0	0	0	0	0
Arl8b	0	0	0	0	0	0	0	0	0	0	265.576	0	5.00894	0	83.1847	78.959	180.929	29.9198	0	73.4391	27.0179	59.847	46.9762	43.9612	0	76.0046	0	0	0	0	107.338	0	122.714	79.5824	0	27.9036	358.617	876.468	622.121	853.694	14.5836	47.3546	117.223	0	0	107.904	52.9656	34.6283	20.1485
Armc1	0	0	0	0	0	0	0	0	0	0	0	0	0	0	0	0	0	0	0	0	0	0	0	0	0	0	0	0	0	0	0	0	0	0	0	0	0	0	0	0	0	0	0	0	0	28.7103	0	0	0
Armc10	132.656	174.291	199.035	154.109	256.539	325.915	259.51	216.277	285.728	243.096	136.56	176.282	120.959	136.857	111.109	81.1818	277.326	205.479	168.554	231.054	242.144	90.0366	193.393	138.304	66.637	68.8068	186.104	212.57	411.296	463.73	84.5578	57.4156	136.019	74.6092	174.78	227.501	47.5321	42.6079	149.125	117.499	203.221	144.362	46.4001	81.6299	81.7959	110.246	117.933	85.353	170.722
Armc5	0	0	0	0	0	0	0	0	0	0	0	0	0	0	12.9225	0	0	0	0	0	0	0	0	0	0	0	0	0	0	0	0	0	40.2094	0	0	0	0	0	0	0	0	0	0	0	0	0	0	0	0
Armc6	0	0	0	0	0	0	40.6965	0	30.4399	23.2929	7.72583	53.7594	54.4587	0	51.2073	37.1575	30.7062	41.0413	0	31.8132	78.3773	41.5954	7.76933	42.0489	0	0	39.9476	14.0081	18.6532	0	24.9376	0	72.0198	0	0	48.1852	85.7592	51.4713	0	0	80.2173	96.7621	0	0	0	33.6534	171.198	16.2628	0
Armc7	0	0	0	0	0	0	0	0	0	0	0	0	0	0	23.2745	20.0702	0	0	0	0	67.4338	8.67042	0	0	0	0	0	0	0	0	0	0	0	0	0	0	0	0	0	0	0	0	0	0	0	0	0	0	0
Armc8	0	0	0	0	0	0	0	0	0	27.6651	21.3589	0	47.2355	16.5514	46.9272	43.4709	63.4646	47.3247	0	0	191.802	56.5951	79.8272	40.1086	0	0	45.4154	57.5177	0	0	29.6403	21.0233	38.5786	64.5644	4.59315	40.1641	12.7446	0	81.974	81.0167	31.9614	92.9556	152.485	80.8448	90.8586	80.4691	75.526	98.4005	0
Armc9	0	0	0	0	0	0	0	0	0	0	0	0	0	0	0	0	0	0	0	0	0	63.1792	0	0	0	0	0	0	0	0	0	0	0	0	0	0	0	0	0	0	0	0	0	0	0	0	0	0	0
Armcx2	0	0	0	0	0	0	0	0	0	0	47.4999	31.3729	0	0	0	0	0	21.4169	0	0	0	0	22.6446	0	0	0	0	0	0	0	0	0	0	0	0	0	0	0	0	0	0	0	0	0	0	0	0	0	48.8077
Armcx3	0	0	0	0	0	0	0	0	0	0	0	0	0	0	0	0	0	0	0	0	0	0	0	0	0	0	0	0	0	0	0	13.2802	0	0	0	0	0	0	0	0	0	0	13.8351	28.6682	14.4812	2.12003	17.7277	0	0
Armh3	0	0	0	0	0	0	0	0	0	0	0	0	0	0	0	0	12.3725	0	0	0	0	0	6.13469	0	0	0	0	0	0	0	0	0	0	0	0	0	0	0	0	0	0	0	0	42.8078	72.5032	19.6184	19.769	10.6637	0
Armt1	0	0	0	0	58.624	50.1148	0	0	0	27.7743	35.9153	24.0714	8.77823	39.466	101.533	105.036	65.4873	96.0396	29.3626	0	60.2323	0	47.9725	65.099	0	0	97.9003	41.4813	38.1551	73.7051	33.2605	21.6532	0	25.5364	0	0	29.7452	28.7734	0	0	82.7068	98.6852	25.2984	0	74.6439	44.211	0	52.1023	0
Arnt	0	0	0	0	0	0	0	0	14.2929	0	27.4859	0	0	0	0	97.4323	0	0	0	0	0	90.0898	0	0	17.4311	0	0	0	82.5396	0	46.7518	0	84.4373	0	0	0	0	0	0	0	1.03704	0	0	0	0	0	0	0	0
Arpc1a	0	0	0	0	0	0	0	0	0	0	45.804	30.6416	0	0	0	0	18.3721	0	0	0	17.7583	8.69624	7.91563	23.2799	0	0	47.536	0	0	0	19.1489	0	0	0	0	0	0	0	0	0	113.887	106.247	0	0	0	8.97453	0	0	0
Arpc1b	224.908	521.618	262.551	520.544	467.998	502.875	367.236	701.567	484.769	414.62	721.209	625.319	427.183	305.003	532.218	579.049	701.812	682.879	582.415	488.705	732.126	731.71	536.07	792.704	579.485	439.893	606.984	644.045	616.799	560.925	698.941	271.828	179.269	285.762	569.137	695.778	412.347	302.241	151.67	234.759	396.165	420.027	425.203	551.079	590.53	786.869	469.045	770.143	397.752
Arpc2	214.713	551.123	318.402	484.399	337.4	395.171	299.344	303.598	492.936	278.814	375.206	296.118	429.205	410.158	215.456	174.23	325.936	328.169	243.906	320.492	106.441	204.93	302.478	286.648	450.445	428.381	361.453	363.849	254.434	283.731	287.872	233.419	356.969	398.65	264.802	274.969	194.515	306.894	305.663	252.991	218.622	238.107	536.068	303.794	295.219	448.067	498.966	467.086	435.558
Arpc3	124.961	60.7332	175.28	0	203.894	179.301	71.0591	186.335	124.612	133.44	189.918	140.23	105.971	80.4165	136.095	148.387	256.578	148.042	254.398	267.886	139.02	38.208	244.471	193.146	192.347	115.617	286.753	212.536	169.573	130.853	188.195	255.55	216.997	396.347	268.385	230.09	84.3586	141.775	259.197	239.485	221.198	403.941	406.099	208.544	180.883	224.335	125.207	275.708	103.326
Arpc4	491.59	310.355	72.1693	20.6008	165.435	263.238	136.02	123.569	185.628	105.601	150.885	157.977	80.7758	202.906	70.389	133.966	164.644	198.098	62.5164	472.175	68.3619	25.6085	242.782	170.925	92.6873	65.9369	153.352	184.969	235.084	200.997	214.329	86.6177	291.827	211.144	139.458	215.187	56.5266	0	0	49.682	114.944	103.01	142.621	281.603	155.108	149.142	34.0685	135.762	45.7031
Arpc5	213.743	103.042	227.434	159.894	295.143	282.522	163.532	233.483	289.985	233.906	254.514	289.193	184.964	297.43	119.818	168.938	198.072	191.825	414.27	125.729	127.588	28.9962	260.748	319.137	277.09	105.692	173.113	159.306	156.354	94.6145	251.553	303.973	147.39	319.227	213.905	277.934	158.702	132.122	57.4007	248.079	139.375	174.584	308.271	205.856	181.785	167.511	152.347	165.785	385.868
Arpc5l	26.7945	19.6537	121.032	145.833	117.789	213.567	122.592	51.0677	123.038	190.692	95.0231	144.991	55.4137	42.4701	119.825	91.1575	87.3749	104.116	217.91	17.5525	110.161	102.576	163.712	129.69	94.1373	250.986	295.467	160.3	83.2589	108.122	192.161	110.032	243.65	69.9169	66.714	70.2147	45.402	8.79283	48.4942	0	15.1041	11.3863	123.141	65.2841	106.403	41.8064	53.6689	103.7	0
Arpin	0	0	0	0	0	0	0	0	0	0	0	0	0	0	0	0	0	0	0	0	0	0	0	0	0	0	0	0	0	0	0	0	0	0	0	0	0	0	0	0	0	0	0	0	0	0	0	0	0
Arpp19	228.57	0	0	0	61.3438	49.6387	0	0	66.4525	94.0077	40.1628	65.0926	139.372	170.442	24.2222	88.5447	0	0	5.12056	0	0	141.44	0	0	288.536	265.303	163.929	123.893	0	0	131.602	0	92.9153	191.063	0	9.84033	169.855	167.119	182.425	412.677	0	16.1812	141.448	44.2287	58.0341	85.5443	114.786	0	0
Arr3	0	0	265.454	0	0	0	0	0	0	0	0	0	0	0	0	0	0	0	0	0	0	0	0	0	0	0	0	0	0	0	0	0	0	0	0	0	0	0	0	0	0	0	0	0	0	0	0	0	0
Arrb1	44.1562	0	0	0	181.214	201.295	203.714	119.896	213.944	215.018	133.115	201.298	80.7108	66.6067	172.601	234.583	154.052	118.772	138.143	165.82	133.336	78.7228	158.364	207.665	0	0	0	0	0	0	132.252	107.213	141.736	166.746	124.077	42.802	141.317	147.357	0	189.697	106.481	153.07	102.29	52.1196	81.9231	62.0778	46.1479	54.6415	209.784
Arrb2	0	0	0	0	0	30.2809	77.9221	0	58.4428	34.396	24.9445	12.0949	22.8195	25.8002	51.4855	10.7378	35.816	34.3588	38.6476	45.9615	53.4075	41.4039	38.2665	54.0654	41.6238	0	18.9924	38.6757	72.2065	52.644	91.652	93.7031	107.228	115.521	41.0596	78.9019	26.1318	0	0	0	30.2203	22.8846	62.6751	64.8141	84.4887	51.5858	0	55.8869	0
Arsa	156.271	0	29.0469	0	162.377	226.428	243.2	221.55	102.692	197.491	166.105	190.189	117.872	91.1198	126.658	128.701	152.537	144.057	107.257	125.791	149.436	153.377	141.713	80.5164	43.0518	119.412	194.88	154.009	154.985	189.554	139.541	72.9532	255.421	143.473	81.5903	66.7973	160.573	180.093	361.329	236.927	89.1923	140.277	124.725	153.815	138.197	224.971	300.854	230.761	197.866
Arsb	127.682	0	0	0	0	0	0	32.369	43.429	35.9409	64.5734	38.7425	33.4957	67.0578	17.3743	33.8473	53.9414	53.2694	103.591	48.1344	17.7812	0	68.6031	65.809	0	41.3074	88.2352	71.5056	122.952	103.614	36.8811	47.619	35.8502	34.8242	75.0209	59.1215	0	0	0	0	0	0	94.1977	117.911	52.954	146.203	153.939	241.062	39.9694
Arsi	0	180.57	166.939	0	0	0	0	0	86.5888	64.9424	0	0	0	0	0	24.8314	0	0	0	0	0	0	0	0	0	0	0	0	0	0	0	0	0	0	0	0	0	0	0	0	0	0	0	0	0	0	0	0	0
Art4	94.1543	223.091	209.294	112.366	159.079	167.638	0	0	24.9848	73.8476	61.0076	87.3202	0	0	41.0683	70.4915	25.9753	12.214	0	0	0	0	14.8106	12.5547	0	0	0	0	0	0	18.1221	23.877	34.4824	0	20.0117	11.6702	0	0	10.5929	118.761	18.9838	31.8851	0	0	0	0	0	0	275.711
As3mt	597.826	748.187	416.703	822.126	584.904	795.788	549.075	631.371	474.191	378.152	511.793	538.05	615.953	539.373	402.438	352.713	553.709	761.96	402.313	554.703	191.801	251.386	569.295	473.622	331.712	429.409	405.403	437.196	421.694	457.895	241.315	294.948	336.621	222.115	363.897	382.028	0	106.631	42.3354	0	102.507	113.379	280.335	379.939	344.44	237.645	384.734	557.841	371.078
Asah1	200.961	0	84.7471	0	135.79	137.293	0	42.7761	0	0	132.934	188.518	121.101	26.2489	44.3533	68.9536	79.0035	137.182	57.5	30.1322	35.9608	0	63.6697	103.712	0	0	0	31.882	0	0	12.8336	35.3115	81.4101	57.2847	80.0914	40.2941	0	0	0	0	15.6185	11.9015	71.6295	34.5427	40.1392	15.4069	0	58.7229	219.021
Asap1	0	0	0	0	0	0	25.4364	58.9598	0	133.174	55.6756	84.6978	64.3216	39.2884	142.549	141.294	0	39.0448	0	0	71.3066	0	0	0	0	0	0	0	0	0	155.157	128.315	322.91	122.872	23.7592	32.4907	132.019	67.5125	0	193.169	117.973	100.783	216.943	227.533	135.117	171.449	306.652	154.64	0
Asap2	0	0	0	0	35.8069	29.1175	0	0	0	0	22.2882	61.0892	0	0	24.884	23.8805	41.5994	65.932	0	0	112.07	86.4684	23.5027	38.7338	0	0	19.589	40.6203	0	0	33.1424	0	25.272	19.5738	0	85.6226	0	0	0	17.8176	39.8872	29.0018	0	34.0021	34.3047	29.67	49.687	34.1207	25.557
Asb18	0	0	0	0	0	0	0	0	0	0	0	0	0	0	0	0	0	0	0	0	0	0	0	0	0	0	0	0	0	0	0	0	0	0	0	0	0	0	0	0	0	0	0	0	0	0	0	9.2771	0
Asb3	0	0	0	0	0	0	0	0	0	0	0	0	22.8103	0	0	26.7669	0	0	0	0	38.9226	0	0	0	0	0	0	0	0	0	14.3475	3.59379	0	0	0	0	0	0	0	0	0	0	0	0	0	0	0	0	0
Asb6	0	0	0	0	0	0	0	0	0	0	0	0	0	0	0	0	0	0	0	0	0	0	0	0	0	0	0	0	0	0	0	0	0	0	0	0	0	0	0	0	11.5205	11.0539	0	0	0	0	0	11.9958	0
Ascc1	0	0	0	0	0	0	0	0	0	0	0	215.9	0	0	0	0	0	0	0	0	0	0	0	0	0	0	0	0	0	0	0	0	0	0	0	0	0	0	0	0	0	0	0	0	0	0	0	0	0
Ascc2	0	0	0	0	0	0	0	0	0	0	0	0	0	0	0	0	2.94444	0	0	0	26.042	38.379	0	0	0	0	0	0	0	0	83.5445	0	0	0	8.52549	0	0	0	0	0	10.6844	12.6338	24.1151	20.3457	24.9836	49.7326	32.4887	22.6606	0
Ascc3	0	0	0	0	0	0	0	0	0	0	0	0	0	0	0	144.363	0	48.4178	0	0	123.786	381.965	60.4603	39.8234	0	0	0	0	0	0	44.9603	41.2949	150.22	59.6309	0	0	43.8397	0	0	0	39.1998	0	0	162.773	108.127	32.5653	0	113.377	0
Asf1a	139.026	30.1435	31.7489	0	21.9387	30.0034	28.4903	27.3127	27.1794	22.1928	21.1699	19.5889	92.8778	113.223	54.8948	51.889	16.8584	29.5248	35.3683	17.4807	66.3556	44.8	34.8823	49.4603	68.0978	37.7583	35.255	38.8084	0	0	60.8086	0	65.2893	27.5294	20.9195	5.24168	81.6281	59.5351	30.0061	136.757	22.6147	24.2001	13.7171	25.8257	61.2166	42.793	65.8455	25.6607	0
Asf1b	0	0	0	0	0	0	0	0	0	0	0	0	27.8083	44.2228	23.1563	16.6994	0	0	0	0	0	0	0	0	0	61.5802	63.8209	73.3232	49.9152	20.9712	22.8704	19.5615	0	25.6104	0	0	15.0947	0	41.3053	10.8929	0	0	15.1994	34.3271	69.8579	14.9405	14.7013	20.3573	0
Asgr1	0	0	0	0	0	0	0	0	0	0	0	0	0	0	0	0	0	0	68.4422	96.9518	0	0	0	0	0	0	0	0	0	0	0	0	0	0	0	0	0	0	0	0	0	0	0	0	0	0	0	0	0
Ash2l	0	0	0	0	133.155	88.396	0	108.87	113.264	171.51	107.62	118.17	109.548	119.962	123.137	91.518	113.206	141.404	77.7782	127.865	200.895	83.9305	145.247	121.965	63.6888	101.339	174.889	178.18	112.444	138.256	139.729	224.515	248.209	130.393	118.231	113.748	29.9057	101.352	65.4413	142.029	164.692	140.914	162.673	111.442	154.885	82.947	262.638	233.09	66.9281
Asl	395.827	21.1153	191.748	0	263.878	244.907	72.0976	141.973	52.89	86.3181	152.977	122.768	505.982	296.153	72.0017	87.8787	97.2855	124.539	92.7537	104.341	55.0978	31.931	121.049	113.018	113.815	0	70.8307	76.8123	104.654	121.728	195.223	84.58	47.3614	151.67	82.184	100.551	48.3944	55.6212	0	16.3377	51.7174	48.5178	148.795	106.744	110.687	84.1644	179.236	157.992	200.443
Asns	0	0	59.1234	0	88.2736	132.374	0	0	0	0	55.9765	41.4066	7.94839	0	13.0416	61.8426	35.4332	0	20.0459	0	140.547	80.2648	0	0	0	0	0	0	61.5341	0	7.01207	222.149	0	13.7534	0	0	244.08	228.45	462.368	330.479	379.432	299.74	20.1885	50.2162	49.9225	96.3348	67.2694	94.3026	29.065
Aspa	0	0	0	0	0	0	0	0	0	0	0	0	0	0	0	0	0	0	0	0	0	0	0	0	0	0	0	0	0	0	0	0	0	0	0	0	0	0	0	0	0	0	0	0	0	0	0	0	56.9717
Aspg	0	0	0	0	0	0	0	0	0	0	0	0	0	0	108.609	0	0	0	0	0	0	0	0	0	0	0	0	0	0	0	0	0	0	0	0	0	0	0	0	0	0	0	0	0	0	0	46.7468	0	0
Asph	249.74	304.462	382.344	140.412	553.768	639.913	290.927	448.45	312.025	292.256	317.412	206.881	109.694	116.483	82.2539	161.715	230.061	179.231	185.003	272.084	88.6218	136.521	137.167	207.196	669.963	90.3611	71.6433	156.124	93.5468	87.0321	209.832	187.325	171.108	171.92	235.935	342.465	668.211	480.936	700.546	300.632	381.582	409.861	84.3112	137.804	101.054	109.338	63.4405	111.376	322.631
Aspscr1	0	0	0	0	51.7611	38.7928	0	0	156.003	180.296	150.676	104.591	0	40.9173	94.5981	72.6947	82.1082	70.0317	52.8177	0	100.668	122.219	126.292	134.226	0	0	96.9411	83.5598	99.9189	82.2143	101.541	64.4603	230.823	40.274	40.5884	67.3973	0	0	0	0	61.1889	40.001	0	52.2025	58.4839	56.6294	0	58.5204	31.5215
Asrgl1	475.805	147.937	214.438	290.257	187.974	199.431	136.146	195.347	251.807	229.011	250.192	262.223	324.671	256.735	279.802	267.887	405.758	343.232	353.568	286.973	234.917	111.546	334.064	385.279	119.357	123.393	244.461	242.908	155.38	169.095	169.032	190.239	160.119	290.156	448.356	374.715	118.642	199.627	54.5231	47.0865	252.473	240.325	266.085	168.704	191.775	200.152	133.355	165.257	451.818
Ass1	17.9359	0	129.419	0	0	0	208.381	231.707	335.142	211.946	97.2858	89.0769	147.291	92.4977	188.738	143.799	78.7217	53.7882	185.864	155.676	65.841	118.907	171.305	102.924	228.787	330.818	390.706	434.809	202.117	314.548	228.749	211.3	313.613	356.543	335.908	464.39	489.794	529.59	500.015	755.464	495.049	429.823	350.78	416.742	419.021	464.39	545.129	259.501	0
Asxl1	0	0	0	0	0	0	0	0	0	0	0	0	0	0	0	0	0	0	0	0	0	0	63.1902	0	0	0	0	0	0	0	0	0	0	0	0	0	0	0	0	0	0	0	0	0	0	0	0	0	0
Atad1	110.74	0	0	0	132.361	85.7588	76.1866	0	154.534	156.607	188.071	156.629	91.5256	42.8665	131.887	125.373	91.7889	99.8716	39.303	260.556	198.001	162.365	224.921	161.097	0	109.11	78.3606	87.5882	172.612	134.541	126.606	125.379	135.164	96.2872	258.596	213.873	133.028	171.139	0	28.3188	140.051	171.91	142.918	187.892	189.716	144.783	96.3898	152.37	78.9718
Atad2	0	0	0	0	0	0	283.99	125.059	197.72	92.7771	238.248	272.485	82.1426	38.2908	130.811	123.609	191.406	150.469	220.358	118.075	104.685	239.159	167.897	176.19	92.8561	22.4934	319.036	466.453	431.403	247.894	261.48	404.767	304.473	234.799	325.751	300.399	133.917	233.989	0	0	267.811	291.175	208.021	267.003	234.457	217.408	205.287	241.186	0
Atad2b	0	0	0	0	0	0	0	0	0	0	57.0321	0	0	0	98.5707	98.492	56.4982	42.5509	92.2542	0	106.902	170.264	33.2186	36.7947	0	0	14.8965	0	0	0	148.823	628.328	0	140.226	81.1075	0	0	0	0	113.313	40.5364	134.896	160.956	129.001	165.553	68.2432	82.9038	113.145	0
Atad3a	339.784	0	162.812	0	104.567	238.877	81.786	134.386	114.626	111.914	126.363	133.096	173.311	77.8209	150.48	201.34	246.391	183.583	160.642	176.225	204.718	184.742	100.244	106.788	69.7662	52.0612	249.781	125.531	307.521	143.498	155.944	127.145	43.6745	89.2095	181.335	265.748	268.516	298.874	76.4053	36.8117	243.294	189.422	112.918	241.936	104.737	191.649	92.9233	155.077	116.621
Atad5	0	0	0	0	0	0	0	0	0	0	0	0	32.6856	0	0	0	0	0	0	0	0	0	0	0	0	0	91.3212	44.177	232.824	59.6099	114.037	0	135.205	103.831	85.0012	74.6038	0	0	0	0	126.05	44.9407	0	205.216	408.541	119.328	168.512	104.024	0
Ate1	0	12.7589	0	0	96.5997	102.864	0	0	20.4318	1.99208	122.143	122.767	39.6119	0	72.8496	102.762	42.472	45.8564	0	17.8834	105.113	122.132	83.1332	86.2414	0	0	0	79.3814	0	0	58.4804	97.3705	79.3206	0	65.4145	51.4358	43.476	25.2199	0	0	72.047	40.6971	30.948	0	98.1217	72.1744	80.0383	53.246	0
Atf1	0	0	0	0	0	0	0	0	0	0	0	0	7.36769	0	0	0	0	0	0	0	0	0	0	0	0	0	12.655	0	0	0	0	42.3939	0	0	0	0	0	0	0	0	0	18.5725	0	0	0	0	0	0	0
Atf2	0	0	0	0	29.5103	0	0	0	0	0	0	20.8042	6.89309	0	15.2576	0	0	18.2079	0	0	48.059	51.1901	5.13689	0	48.286	0	0	0	35.9297	0	24.7762	0	0	0	0	4.26172	0	0	0	0	19.6303	20.2229	0	22.0746	29.6262	46.8086	20.0671	0	0
Atf7	0	0	0	0	0	0	0	0	0	0	17.5235	37.7285	0	0	33.4185	26.3728	20.4845	0	0	0	30.4498	15.7496	0	8.34761	0	0	0	0	0	0	0	61.6879	0	0	0	22.0755	0	0	0	0	0	1.28916	0	0	0	0	0	22.7025	0
Atf7ip	0	0	0	0	0	0	296.03	270.397	125.461	187.849	0	0	58.3463	36.0235	161.314	165.785	0	64.5774	153.326	187.279	230.452	287.091	75.9231	58.9407	172.566	208.328	0	0	0	0	298.176	131.285	167.53	125.565	19.5152	47.7332	191.661	255.571	74.5281	129.758	128.773	209.976	84.3292	156.284	168.464	101.259	196.693	121.455	124.294
Atg101	0	0	0	0	0	0	0	0	0	0	0	0	0	0	0	0	0	0	0	0	0	0	0	0	0	0	0	0	0	0	0	0	0	0	0	0	0	0	0	0	0	0	0	0	0	0	0	9.79548	0
Atg12	0	0	0	0	0	0	0	0	0	0	0	0	0	0	0	17.3751	0	0	0	0	0	0	0	0	0	0	0	0	0	0	0	0	0	0	0	0	0	0	0	0	0	0	0	0	0	0	0	0	0
Atg16l1	0	0	0	0	0	0	0	0	0	0	0	0	0	0	23.2211	11.4453	0	0	0	0	89.4659	75.0123	0	0	0	0	0	0	0	0	81.9061	0	0	0	0	0	0	0	0	0	16.9445	0	0	0	51.7503	31.5924	0	16.8784	0
Atg2a	0	0	0	0	0	0	0	0	0	0	0	0	0	0	77.171	0	0	45.5712	0	0	70.9563	46.6511	5.84045	0	0	0	0	0	0	0	0	0	0	0	0	0	0	0	0	0	9.99789	0	28.6364	0	0	46.0685	0	21.9929	0
Atg2b	0	0	0	0	0	0	0	0	0	0	0	0	0	0	0	0	0	0	0	0	0	0	0	0	0	0	0	0	0	13.3222	0	141.696	0	0	0	0	0	91.661	0	281.357	48.1891	51.7698	0	0	0	118.144	301.444	44.9951	0
Atg3	113.829	75.2177	166.57	123.739	211.595	122.972	201.694	90.9562	108.784	133.056	12.6831	96.5903	80.3886	114.076	302.475	159.815	59.8702	101.338	70.3437	226.421	31.5633	29.0259	71.6314	66.6689	107.211	102.381	60.6112	48.5938	65.7971	109.008	107.66	50.4691	120.873	58.3356	23.6538	65.3359	155.443	179.355	193.424	156.246	46.4866	62.0909	70.799	71.2655	104.802	106.503	146.919	36.5514	84.0818
Atg4a	0	0	0	0	0	0	0	0	0	0	0	0	0	0	0	0	0	0	0	0	0	0	0	0	0	0	0	0	0	0	0	0	0	0	0	0	0	0	0	0	0	0	0	0	0	0	0	4.25014	0
Atg4b	37.3503	0	81.667	0	0	0	83.3087	72.2947	21.619	64.3239	38.3744	44.0663	103.729	44.3689	69.8744	53.6619	29.6004	26.723	52.3379	118.585	45.3745	18.8429	50.7134	38.3075	63.4366	185.145	44.4847	24.9909	0	0	123.891	61.4229	50.9229	39.9129	0	0	83.998	67.95	44.6588	62.435	51.0237	3.68535	42.3359	102.96	133.419	65.647	48.1597	86.9942	37.9871
Atg5	0	0	0	0	32.2706	0	0	89.9212	79.4799	20.4267	27.0689	18.9826	15.7921	20.2495	43.6718	43.4306	40.3686	42.6741	99.3014	25.2908	31.034	0	30.3094	61.0056	0	0	0	0	0	56.6279	100.697	154.425	77.9032	84.4155	0	0	0	0	0	0	0	0	107.196	0	0	18.0711	105.409	0	0
Atg7	157.614	158.653	0	0	229.123	136.609	250.06	157.012	201.503	191.945	249.557	168.058	85.6049	47.6789	148.645	193.058	164.678	183.579	218.058	168.635	296.572	223.04	119.93	175.3	5.28936	0	115.992	100.735	44.7035	10.9458	86.083	83.332	86.2486	138.448	106.28	37.4047	166.455	50.2677	0	0	58.8907	42.0427	192.517	132.767	162.933	133.231	154.489	88.7286	84.5348
Atic	1100.33	2084.01	1518.58	1425.3	1391.48	1530.81	1725.53	1588.04	1260.24	1554.25	1532.22	1350.97	1396.65	1883.15	1556.78	1382.19	1333.32	1353.07	1979.77	1581.12	1228.77	1157.09	1399.59	1302.44	1693.19	1205.11	1352.66	1367.79	1246.94	1157.93	1480.75	1770.01	1348.28	2163.11	1002.3	859.159	1573.16	1514.85	1902.82	1546.65	1269.88	1271.77	1648.46	1338.99	1403.45	1190.02	1096.18	940.421	1351.85
Atl2	0	0	0	0	0	0	25.236	0	0	0	19.8543	25.6093	0	0	0	0	0	0	0	19.3227	0	0	0	0	0	77.1988	0	50.3601	88.3828	93.7326	54.1939	18.4881	0	0	51.1773	77.5141	150.413	83.8899	400.121	122.645	74.4516	96.6794	40.6174	39.2168	107.652	58.7759	67.8908	59.3703	0
Atl3	156.713	289.868	259.346	64.3515	183.158	188.112	332.584	295.828	279.506	260.132	253.367	319.373	192.564	229.43	206.833	282.197	176.945	194.834	170.618	341.884	143.881	122.667	198.319	215.016	171.801	120.36	100.673	135.018	124.357	123.084	260.244	280.111	251.251	202.936	226.33	254.911	396.769	273.829	331.846	317.096	247.101	232.818	211.408	300.659	282.57	257.73	245.152	186.101	296.75
Atm	0	0	0	0	82.8548	0	0	0	186.629	0	106.346	150.072	45.1919	0	196.509	94.52	195.173	148.931	130.739	0	144.148	251.624	126.553	168.615	0	0	361.066	376.681	155.041	582.433	126.839	152.768	100.852	68.2579	61.8615	47.8609	0	0	0	0	104.528	162.81	0	111.356	183.918	113.952	99.4532	254.863	0
Atn1	0	0	0	0	0	0	0	0	0	0	0	0	0	0	0	0	0	0	0	0	0	0	0	0	0	0	0	0	0	0	0	0	0	0	0	0	0	0	0	0	0	0	0	0	0	0	0	0	0
Atox1	715.483	676.948	234.68	732.283	507.172	422.114	352.466	496.915	550.705	628.489	368.671	377.346	369.022	319.405	245.29	341.328	478.733	290.802	215.371	388.611	399.093	432.434	295.585	415.252	504.832	411.951	351.87	342.217	180.444	229.344	289.937	169.864	331.658	164.25	352.739	376.059	203.986	296.993	434.726	448.676	383.956	308.305	234.53	163.137	155.342	219.172	424.148	351.662	355.788
Atp11b	0	0	0	0	0	0	0	0	0	0	4.81599	0	10.14	0	41.602	48.8894	74.581	117.92	0	0	68.0715	172.807	0	21.5782	0	0	0	0	0	42.1606	0	23.0022	0	0	82.94	0	0	0	0	0	0	0	0	92.3079	55.5552	43.1803	0	68.9906	0
Atp11c	0	0	0	0	0	0	0	0	0	0	0	0	0	0	0	0	0	0	0	0	0	77.7146	0	0	0	0	0	0	0	0	0	0	65.4057	0	0	0	0	0	0	0	0	0	62.585	0	0	18.6036	252.307	71.259	0
Atp13a1	0	0	63.0771	0	195.982	0	0	0	0	42.4383	108.087	93.3544	111.951	0	133.843	156.182	179.123	164.875	224.08	68.0284	114.846	102.707	145.272	120.64	0	0	33.6866	35.677	49.0697	224.151	130.265	101.184	89.2582	118.283	267.28	233.053	91.7	43.6271	0	0	183.786	175.623	208.322	294.855	222.637	204.369	265.229	226.768	46.9804
Atp1a1	1175.92	1028.14	841.703	1096.17	953.579	835.986	1293.4	1444.41	972.973	1208.19	744.461	905.13	1058.29	1157.58	950.223	832.937	945.821	933.556	775.936	1396.95	623.703	244.055	860.344	621.622	1114.28	1483.08	1106.29	890.556	1089.39	1041.28	1049.27	887.455	1057.72	807.965	1268.59	968.476	1187.27	1090.05	847.901	1130.39	858.612	964.744	820.663	898.914	712.707	905.693	884.153	866.539	1539.91
Atp1a2	0	0	0	0	0	0	0	0	0	0	0	0	0	0	0	0	0	0	0	0	0	0	0	0	0	0	0	0	3.5071	0	0	0	0	0	0	0	0	0	0	0	0	0	0	0	0	0	0	0	0
Atp1a3	0	0	0	0	0	0	0	0	0	0	0	0	0	0	0	0	0	0	0	0	0	0	0	0	0	0	0	0	0	0	0	0	0	0	0	98.0137	0	0	0	0	0	0	289.312	153.405	165.423	166.771	116.299	226.83	0
Atp1a4	0	0	0	0	0	0	0	0	272.456	0	31.2498	0	0	0	210.467	153.95	36.3446	0	0	0	140.967	90.1884	0	0	0	369.999	0	63.5567	89.3378	0	0	0	130.232	0	0	44.4857	0	0	156.446	182.371	0	0	0	0	0	0	195.504	0	0
Atp1b1	0	0	0	0	0	0	0	0	0	0	0	0	0	0	0	0	0	0	0	0	0	0	16.061	17.4282	0	0	0	0	0	0	0	0	0	0	0	0	0	0	0	0	0	0	0	0	0	0	0	0	0
Atp1b2	0	0	0	0	0	0	0	0	0	0	0	0	0	0	0	0	0	0	0	0	0	0	0	0	0	0	0	0	0	0	6.84389	0	0	0	0	0	108.183	94.5513	0	31.1631	18.6993	59.447	0	0	0	0	0	0	0
Atp1b3	155.016	220.437	308.286	112.111	135.858	168.591	186.366	287.112	183.023	222.843	238.507	181.14	242.08	308.405	269.456	218.806	106.086	166.42	267.556	180.403	253.011	104.281	148.262	159.422	114.727	318.127	168.653	135.257	117.091	217.869	151.113	131.58	164.343	204.279	174.854	160.122	115.426	96.736	84.0682	38.6356	135.045	101.204	173.88	172.826	212.279	172.031	180.157	168.048	189.598
Atp2a1	0	455.014	814.486	0	0	0	1813.74	1592.79	181.663	159.244	24.6701	45.9049	78.3237	179.602	82.2002	105.305	26.9395	36.7174	0	213.873	33.9174	0	33.2974	18.5407	0	0	0	0	0	0	0	0	0	0	0	0	0	10.1829	0	0	0	0	0	0	0	0	0	0	0
Atp2a2	97.683	91.623	529.383	97.8804	221.959	136.595	118.105	124.992	172.617	184.947	257.15	181.946	181.189	361.692	224.587	277.506	143.874	189.916	102.67	186.319	78.1152	256.343	397.447	248.981	574.908	352.079	166.652	175.066	319.589	204.634	246.501	428.065	326.942	331.155	427.051	252.399	323.125	313.022	594.884	476.101	524.861	446.457	818.803	714.573	664.795	665.8	591.393	588.219	72.8002
Atp2a3	340.831	351.362	277.623	0	625.528	537.624	474.778	517.682	573.687	468.227	521.822	456.403	508.18	290.96	585.3	512.35	564.68	545.537	283.826	506.309	539.142	174.051	288.729	455.849	184.399	201.362	345.106	361.571	291.26	257.446	217.945	233.398	365.232	434.772	276.289	500.616	0	0	0	0	45.939	45.5852	347.898	415.363	388.025	299.118	239.738	281.851	489.402
Atp2b1	0	0	111.802	0	118.011	0	61.7137	18.3334	0	0	17.4042	49.154	58.473	16.3398	104.868	73.6756	51.5362	88.8801	35.9041	0	58.9958	68.192	81.1961	84.8749	0	0	0	0	0	0	29.261	0	0	12.7182	55.1129	52.0389	59.9924	0	0	0	46.8354	86.6071	36.3357	284.886	180.248	58.8684	46.9797	63.7706	84.5509
Atp2b4	580.557	0	532.161	168.453	529.679	581.515	340.074	384.931	358.22	224.696	337.153	344.012	309.339	281.706	363.046	295.095	367.862	223.604	291.281	438.097	233.198	373.608	254.631	258.705	140.129	248.236	245.071	272.872	258.907	289.984	164.895	249.591	301.988	235.257	193.368	267.05	0	17.4994	20.1514	76.3413	0	0	187.312	91.7604	99.7991	197.358	203.378	121.1	470.482
Atp2c1	0	0	0	0	0	0	0	0	0	0	0	0	0	0	0	0	0	0	0	0	0	0	0	0	0	0	0	0	0	0	0	0	0	0	0	0	0	0	0	0	0	0	0	0	0	15.6457	0	0	0
Atp5a1	2223.11	2767.6	2030.47	2846.74	2795.14	2577.31	2226.06	2511.05	1868.85	2414.56	2438.93	2001.41	2139.78	2578.67	1795.84	1859.88	2625.56	2781.84	2288.72	2553.11	1699.68	1542.81	2690	2248.9	2424.08	2684.17	2375.47	2502.74	2573.95	3333.87	1432.74	2190.64	2177.74	1970.51	3048.71	2807.45	2256.2	2653.66	2888.88	2838.24	2988.59	2798.05	2453.28	2451.06	2827.57	3127.25	2990.92	2611.34	2158.02
Atp5b	9586.46	4255.28	3174.85	4569.97	2476.91	2531.25	2765.72	3108.99	2329.7	2800.84	3581.65	3423.59	4959.11	4710.31	3343.66	3746.88	3409.6	3801.94	2568.43	3541.52	2428.48	1913.52	3914.81	3471.56	3193.24	3233.22	3408.71	3188.76	2847.4	2850.77	2204.92	2884.48	2312.57	2955.71	4050.43	3745.64	2610.32	2751.35	3175.9	3128.62	4400.78	3917.61	3115.53	2355.52	2295.41	2874.19	1792.34	3697.03	3510.53
Atp5c1	56.6303	314.898	90.0673	93.2719	266.05	232.681	224.506	307.136	183.063	130.554	139.607	120.852	78.6856	110.441	82.7759	97.0496	202.252	140.246	145.989	236.532	73.3247	74.2714	131.809	104.079	247.955	164.523	127.646	144.127	199.225	213.53	157.852	167.395	235.488	150.778	138.999	130.362	367.854	326.506	207.704	207.415	200.797	134.539	257.671	167.335	89.4436	238.49	157.301	121.163	171.6
Atp5d	178.287	422.639	283.853	464.641	284.846	220.988	282.227	331.125	203.703	220.569	65.0512	97.0762	194.796	376.614	161.659	98.161	80.699	115.679	265.444	196.498	62.258	0	120.745	57.3546	283.167	278.366	170.101	198.068	162.584	150.228	222.792	159.97	238.321	153.282	110.817	54.8851	285.897	315.19	774.527	371.045	133.87	148.372	182.596	134.669	112.161	145.279	173.171	57.5161	292.414
Atp5e	0	0	0	0	0	0	0	0	0	0	18.5843	0	0	0	0	0	9.46428	39.0219	0	0	0	0	16.5169	10.7513	0	0	58.1222	24.1915	0	41.2278	0	0	0	0	52.4465	35.9268	0	0	0	0	16.2834	23.6366	0	0	0	0	0	0	0
Atp5f1	52.2107	120.016	95.2695	0	143.37	79.0114	135.496	198.488	19.3614	123.782	103.176	90.9841	105.579	77.1297	18.2571	29.0786	113.65	167.296	83.3999	201.225	51.93	189.305	160.12	118.245	76.301	92.6225	140.731	138.411	144.348	87.3137	73.7677	63.2032	110.412	197.691	194.569	163.277	25.8864	151.625	208.769	133.68	107.872	115.455	255.241	126.597	90.4025	105.888	90.6161	143.491	160.994
Atp5g2	0	0	0	0	0	0	0	0	0	0	0	0	0	0	0	15.9642	0	0	0	0	23.106	0	0	0	0	0	0	0	0	0	0	0	0	0	0	0	0	0	0	0	0	0	0	0	0	36.1217	0	0	0
Atp5j	411.011	0	314.142	0	170.14	248.347	278.33	141.02	211.637	242.095	217.368	310.301	152.503	226.526	165.082	141.246	150.466	140.413	267.571	50.6818	135.688	155.782	318.205	244.507	534.396	457.23	254.92	251.115	135.646	93.9121	163.579	170.98	186.524	115.865	285.055	361.052	276.799	260.385	420.277	301.144	249.843	254.837	132.772	205.727	126.406	137.085	96.96	201.133	249.19
Atp5j2	20.6393	0	0	83.5768	49.6249	57.8763	109.081	53.1375	0	62.6399	88.7579	62.4135	0	18.46	0	0	52.1122	72.6753	44.6854	23.1232	0	0	59.3915	45.4999	35.3678	53.1538	68.9161	67.2978	84.1061	59.9781	49.7145	131.118	0	42.1721	101.024	49.7153	57.4326	32.1627	86.9749	16.0272	47.2153	46.5436	52.8693	61.4597	0	9.2477	0	47.2984	46.322
Atp5k	262.162	437.649	316.959	538.697	134.857	178.357	283.686	260.384	176.015	138.913	167.826	156.018	290.641	235.746	167.058	237.921	224.067	191.592	154.397	274.853	65.4437	176.139	184.983	172.057	359.237	423.715	182.987	153.078	155.538	249.38	242.113	247.793	182.074	183.894	241.605	196.392	358.281	428.1	459.612	304.096	225.116	310.114	168.473	161.098	150.666	144.637	178.073	243.46	200.496
Atp5l	0	37.8393	141.391	0	131.826	65.3419	67.3802	0	0	0	38.8522	20.3117	57.2934	40.5823	54.6975	36.638	37.0348	40.9322	64.7178	74.5434	30.8361	20.5352	58.3204	60.1899	193.15	197.107	87.3258	89.7386	131.428	74.7067	104.172	108.102	54.6422	100.023	114.506	67.1384	140.435	94.7507	31.2202	36.118	28.1655	32.7799	35.1448	94.4221	117.065	153.259	107.651	31.1245	225.123
Atp5md	85.3047	130.575	175.004	186.528	72.1079	146.589	189.589	213.747	181.462	85.8499	54.1309	67.6725	34.6319	183.502	45.7336	38.7798	44.9946	30.4782	44.4916	48.31	50.7798	57.8611	41.6513	44.7851	190.072	71	88.4465	63.9277	101.211	97.4867	46.3751	69.633	182.859	123.428	119.279	82.0898	185.534	178.929	267.815	208.12	83.9027	83.1633	77.8919	106.201	102.515	56.4472	169.632	78.63	115.981
Atp5mpl	0	0	0	0	0	0	0	0	0	0	15.3893	14.8169	0	10.5064	0	0	30.5947	35.9569	17.0421	30.6735	0	0	12.7383	11.2295	0	0	27.1056	35.0796	0	0	33.8785	0	0	0	14.2592	28.5622	0	22.951	0	0	12.7169	38.7796	44.7685	0	0	13.4729	0	27.1108	26.0828
Atp5o	77.7889	413.922	377.775	416.165	210.009	189.763	385.699	354.075	276.819	392.021	194.537	213.181	191.424	307.888	182.785	158.624	233.409	296.238	329.175	353.575	63.3295	8.76767	284.768	277.825	369.175	367.397	207.391	237.177	228.328	234.55	216.917	517.996	201.033	392.728	329.17	267.487	276.518	309.711	416.423	474.462	288.272	267.148	503.232	277.869	322.672	270.308	148.925	286.038	421.241
Atp5pd	468.749	572.856	448.741	862.022	636.973	657.085	468.036	639.377	397.158	392.692	635.014	669.713	443.202	347.06	310.445	475.868	790.712	725.533	361.507	422.015	231.8	111.14	652.66	581.174	486.598	326.727	683.156	633.396	468.208	574.998	481.298	382.354	333.305	278.566	939.934	757.351	430.338	381.131	366.902	549.067	917.834	740.342	342.456	295.7	553.45	483.014	331.036	515.921	480.718
Atp5s	0	0	0	0	0	0	0	0	0	0	0	0	0	0	0	0	7.71821	0	0	0	0	0	0	0	0	0	0	0	0	0	0	0	0	0	0	8.47641	0	0	0	0	0	0	0	0	0	0	0	7.55983	0
Atp5sl	0	0	0	0	0	0	0	0	0	0	0	0	0	0	0	0	0	0	0	0	0	0	0	0	0	0	0	0	0	0	0	0	0	0	0	0	0	0	0	0	0	0	0	0	30.8268	4.27487	0	0	0
Atp6ap1	187.568	0	0	0	86.2727	19.6065	0	0	0	0	0	7.74025	13.3512	0	41.6798	32.3479	33.2547	44.1836	0	0	0	0	5.94693	2.26948	0	0	0	0	12.4032	0	0	25.1521	87.1878	9.89548	24.9619	14.8649	0	0	0	0	59.7549	62.6582	90.3771	95.1925	73.777	54.8364	162.482	72.4962	0
Atp6ap2	30.1549	0	0	0	17.5576	0	0	0	0	0	0	0	6.78434	0	0	0	0	0	0	0	31.2861	0	0	0	0	0	0	0	0	0	0	0	0	0	6.31403	0	0	0	0	0	0	5.53527	14.2077	28.0959	30.6596	25.5512	83.1264	78.3814	0
Atp6v0a1	0	0	0	0	0	0	0	0	0	0	27.4977	11.0447	0	0	0	0	0	20.5711	0	0	0	0	0	0	0	0	0	0	0	0	0	0	0	0	0	0	0	78.5371	0	0	0	12.4169	107.473	0	0	0	0	66.1892	0
Atp6v0a2	0	0	0	0	0	0	0	0	0	0	0	0	0	0	0	0	0	0	0	0	0	0	0	0	0	0	0	0	0	0	0	0	0	0	0	0	0	0	0	0	0	0	0	0	0	0	0	45.3972	0
Atp6v0d1	0	65.7602	69.1703	94.4246	44.34	65.775	51.5306	104.053	89.939	79.1797	63.0815	46.3212	0	17.0837	55.5756	65.0181	42.3027	61.1223	0	75.4961	26.8693	47.8438	99.8481	67.1712	0	99.6854	0	0	0	0	0	61.5141	105.981	0	48.454	133.135	61.8843	25.4053	72.1026	227.951	20.1459	138.001	237.333	154.349	74.2749	169.034	180.759	192.79	24.1996
Atp6v1a	207.513	469.232	302.045	0	297.152	250.353	168.815	299.809	322.38	153.979	268.422	260.338	366.366	265.89	303.51	267.426	273.585	273.591	200.501	247.67	342.084	267.522	298.8	246.67	309.646	101.501	240.635	178.766	102.694	94.1714	242.34	211.84	356.422	246.272	108.489	103.299	156.321	107.166	311.918	263.957	126.095	127.232	396.347	293.347	367.176	400.05	297.324	431.728	238.258
Atp6v1b2	89.5411	221.41	641.629	222.352	397.616	386.345	165.012	177.938	191.191	376.14	435.685	354.016	301.962	103.858	392.886	477.396	366.073	477.936	456.259	370.022	276.447	348.546	439.683	342.32	153.082	131.156	334.817	298.456	287.089	253.078	384.696	370.568	319.966	383.083	410.73	437.392	200.793	161.873	118.288	51.5392	394.339	419.158	552.992	463.056	390.096	448.449	443.206	425.393	476.98
Atp6v1c1	304.471	92.5558	260.403	0	74.7544	151.879	38.9765	106.068	199.065	174.061	74.116	103.267	287.592	29.2936	146.291	113.539	95.512	135.993	73.5027	190.31	146.201	91.6215	101.222	80.0047	0	0	109.367	103.692	246.635	254.709	62.4373	94.1357	125.57	68.3976	78.4457	61.35	22.5583	109.285	254.593	245.248	118.711	126.974	87.3535	142.476	175.936	213.533	181.277	242.457	137.179
Atp6v1d	49.6733	0	0	0	0	0	0	0	0	0	0	0	12.5949	70.9641	0	0	24.0211	0	36.5247	0	0	0	11.4424	17.4649	49.4655	68.5287	0	0	0	0	56.4036	39.0818	51.957	20.2835	0	0	54.7762	0	0	0	0	0	82.1129	36.9302	20.2337	10.6743	94.2336	22.093	0
Atp6v1e1	147.912	0	278.671	0	0	0	0	0	61.1056	0	139.172	136.239	101.518	43.815	143.197	219.416	134.709	97.6442	233.137	160.57	122.483	176.039	104.213	120.887	102.046	0	103.85	32.0777	0	0	79.2497	146.081	151.989	135.033	142.208	94.7065	56.8156	0	0	0	43.9503	54.1177	118.919	82.8404	107.603	25.7522	131.222	111.871	48.533
Atp6v1e2	0	0	0	0	0	3.98017	0	0	0	108.581	0	0	0	0	0	0	0	0	0	0	0	0	0	0	0	0	0	0	0	0	0	0	0	0	0	0	0	0	0	0	0	0	0	0	0	0	0	0	0
Atp6v1f	36.6287	184.991	141.908	107.854	42.9269	60.0538	173.019	232.736	101.813	70.5614	56.6206	42.1611	0	55.9188	60.2048	53.2287	63.4409	54.5587	39.3358	93.5683	34.63	24.6979	67.435	47.2957	64.4397	56.5167	34.8769	38.9553	148.554	60.1626	20.6434	61.2598	102.139	24.715	28.2453	21.7283	77.6349	106.68	143.109	162.755	12.9021	17.7418	41.6517	24.9835	64.7744	68.4826	54.0816	46.0807	84.2175
Atp6v1g1	161.627	70.986	62.3786	272.238	183.633	134.876	215.923	275.52	175.142	142.166	108.413	39.1608	70.7499	147.499	83.5583	112.29	74.447	59.6474	237.478	233.832	61.2584	155.088	56.1672	36.4501	154.523	221.215	84.8781	104.131	72.2236	60.3166	140.428	140.461	78.8658	138.963	82.1959	67.39	127.648	145.069	0	53.6551	90.1582	44.9032	103.898	87.9069	121.216	157.749	77.7167	40.3566	106.773
Atp6v1h	90.2587	86.902	168.114	0	155.926	96.8087	107.128	107.056	131.92	113.209	65.0339	113.226	45.3692	86.3912	67.7957	43.9374	134.842	117.239	113.93	100.562	178.036	164.417	49.0915	80.4654	91.8072	74.2028	49.3898	49.2765	83.8651	84.5095	169.827	164.77	64.9104	135.205	30.8921	40.4164	68.1429	54.1466	0	0	81.308	67.2736	159.53	144.566	199.759	233.246	250.666	129.276	173.485
Atp7a	0	0	0	0	0	0	0	0	0	0	0	0	0	0	0	0	0	0	0	0	0	0	0	0	0	0	0	0	0	0	0	0	0	0	0	0	0	0	0	0	0	0	0	0	0	0	0	0	0
Atp7b	0	0	0	0	0	0	0	0	0	0	0	0	0	0	0	0	0	0	0	0	0	0	0	0	0	0	0	0	0	0	0	0	0	0	0	0	0	0	0	0	0	9.46553	0	0	0	0	0	0	0
Atp8a1	0	0	0	0	0	0	0	0	0	618.532	23.0337	0	0	179.376	32.0977	53.0765	0	31.9325	0	0	0	0	0	0	0	0	0	0	0	0	14.6367	0	0	0	0	27.1315	0	0	0	0	69.2169	64.7575	0	0	0	0	0	45.0117	68.9671
Atp8a2	0	0	0	0	0	0	0	0	0	0	0	0	0	0	0	0	0	0	0	0	0	0	0	0	0	0	0	0	0	0	0	0	0	0	0	0	0	0	0	0	43.3397	0	0	0	0	0	0	0	0
Atp8b4	0	0	0	0	0	0	0	0	0	0	0	0	0	0	0	0	0	0	0	32.1383	0	0	0	0	0	0	0	0	0	0	0	0	0	0	0	0	0	0	0	0	0	0	0	64.577	115.687	42.5783	31.2492	30.2921	0
Atpaf1	0	0	0	0	0	0	0	0	0	0	0	0	0	0	0	0	0	0	0	0	0	0	0	0	0	0	0	0	0	0	5.59288	0	27.208	0	0	0	0	0	0	0	0	23.7824	0	0	0	0	0	0	0
Atpaf2	0	0	0	0	0	12.0564	0	0	0	39.4186	5.06008	31.8443	7.61323	0	0	0	0	21.5034	0	0	0	48.3976	0	19.675	0	0	58.9564	0	0	0	21.8038	63.2039	28.6576	41.4426	8.40327	15.6534	0	46.2951	0	0	0	51.6549	0	0	0	10.9721	0	11.6569	0
Atpif1	0	0	0	0	0	0	0	0	0	0	0	86.367	0	0	0	66.6751	0	0	0	0	0	0	0	0	0	0	0	0	0	0	0	0	0	0	0	0	0	0	0	0	181.991	61.4982	0	59.0873	10.9235	0	0	0	0
Atr	0	0	0	0	0	0	0	0	0	0	43.7454	62.2783	47.0717	0	0	74.1382	0	0	0	0	92.5974	0	0	0	0	0	0	0	0	53.6424	47.9221	44.5496	103.452	0	0	0	0	0	0	0	61.5841	115.629	55.043	0	0	50.0556	115.934	116.5	0
Atrip	0	0	0	0	0	0	0	0	0	0	9.41532	0	29.6362	0	26.7636	31.7034	89.1288	92.3384	0	0	29.6209	0	23.7381	37.2032	0	0	0	0	67.7813	0	42.7454	20.201	0	76.0736	11.083	27.5336	0	3.36217	0	0	35.7903	35.1328	0	38.4977	0	45.8927	0	32.6528	0
Atrx	0	0	0	0	768.002	0	747.836	881.846	403.011	384.464	433.598	359.587	307.867	541.491	556.653	579.747	430.952	494.116	649.198	349.425	800.673	1210.68	468.346	413.803	1261.24	822.691	406.238	484.689	271.239	396.881	733.683	644.188	767.974	465.632	574.381	476.057	604.725	671.853	487.742	911.555	240.259	341.286	329.318	603.279	598.636	912.724	355.634	344.665	617.884
Atxn10	119.161	250.189	225.045	158.22	264.503	270.308	396.107	232.572	233.924	140.503	266.825	286.605	224.35	198.821	154.185	207.51	301.239	301.457	229.709	272.018	179.443	100.916	324.311	281.964	234.48	217.828	305.746	377.755	326.045	236.172	201.409	284.123	247.966	270.31	228.618	304.859	196.601	317.387	111.499	322.216	226.281	196.582	273.785	114.611	132.817	329.071	145.945	266.903	214.467
Atxn2	0	0	0	0	0	0	0	0	0	0	155.6	200.97	38.327	155.742	163.731	320.227	95.47	115.624	279.804	76.0506	145.847	0	113.418	101.059	874.142	951.918	241.291	69.6194	0	375.259	87.2844	368.737	50.1723	124.86	170.051	127.863	434.533	355.068	1735.82	1091.32	292.123	247.35	138.025	177.876	172.641	96.775	101.714	100.184	0
Atxn2l	51.4937	62.5525	0	0	284.961	278.012	267.751	390.738	343.692	305.681	215.685	224.06	256.593	274.768	207.349	209.973	169.952	184.758	215.81	263.352	195.532	183.78	218.423	167.81	623.818	472.29	292.432	319.671	413.862	447.871	246.514	284.211	326.469	273.768	239.487	263.317	596.756	528.048	272.412	447.671	434.07	352.432	225.413	359.614	382.355	276.926	336.844	254.607	189.923
Atxn3	0	0	0	0	834.063	0	483.748	59.2305	438.334	316.048	176.267	118.768	48.6015	29.6154	235.014	169.585	51.0989	37.5698	272.193	29.4289	188.599	84.65	40.0083	41.1256	0	0	42.1268	372.033	290.317	22.1144	88.3294	220.508	35.7212	202.089	24.2176	29.0009	292.472	8.1233	70.3433	1554.66	49.149	21.6297	68.5421	55.1975	59.8307	23.8369	48.9855	41.1449	33.1806
Atxn7l1	258.91	0	189.872	0	0	0	0	0	0	0	0	0	0	0	0	0	0	0	0	0	0	0	0	0	121.92	89.6402	0	0	0	0	0	0	0	0	0	0	124.404	0	0	0	0	0	0	0	0	0	0	0	0
Atxn7l3	0	0	0	0	0	0	0	0	0	0	3.34819	0	14.3249	0	0	0	2.58503	0	57.7607	0	11.7666	0	4.78867	13.5598	0	0	0	0	0	0	0	48.6181	11.8121	32.8378	0	0	0	0	0	0	0	0	0	0	27.8659	0	57.5115	0	0
Atxn7l3b	28.3648	0	0	0	0	0	31.9963	0	11.0365	0	30.3179	32.283	24.8661	74.9778	57.4474	24.2491	24.9606	26.7672	28.3885	0	28.4144	0	20.5012	22.3594	24.6611	7.80967	45.5503	39.2882	0	0	27.7933	0	0	0	117.093	44.2421	85.7347	0	0	0	75.9916	83.7585	0	62.4213	54.5807	40.5117	0	45.4967	0
AU015228	0	0	0	0	92.7579	0	0	0	0	0	43.8428	0	0	0	0	0	0	0	0	0	0	0	0	0	0	0	0	0	43.1968	0	0	0	0	0	0	0	0	0	0	0	0	0	0	0	0	0	142.145	0	0
AU019823	0	0	0	0	0	0	0	0	0	0	0	0	7.63675	0	43.6773	0	43.1029	39.5425	0	0	0	0	0	0	113.97	0	0	0	0	0	0	44.7192	21.7209	34.2789	0	41.1874	0	0	0	0	0	0	0	76.8692	50.9875	20.3029	88.7124	22.6481	0
AU040320	0	0	0	0	18.7275	0	0	0	0	0	0	0	0	0	0	0	0	0	0	0	42.6463	0	0	0	0	0	0	0	0	0	0	0	0	0	32.303	0	0	0	0	0	0	0	0	0	71.1668	0	0	0	0
Auh	0	0	141.306	0	0	0	0	0	0	0	0	31.5754	15.8738	0	41.2016	35.3082	58.981	38.5186	35.8252	0	0	0	18.8912	64.8338	0	0	21.4057	35.6867	111.418	0	21.6382	11.8729	0	19.6313	31.436	25.9065	0	0	0	0	16.9355	26.3647	19.4301	27.365	0	0	0	11.5917	0
Aup1	0	0	0	0	0	0	0	0	0	0	57.09	127.472	8.28371	0	59.0642	32.3532	107.236	66.341	0	0	171.354	86.782	136.578	75.8884	0	0	0	37.4294	0	0	61.1326	18.6	0	36.3055	299.445	66.8949	23.2444	0	0	0	293.259	123.96	121.138	0	0	30.742	82.2831	60.4279	0
Aurka	0	0	0	0	0	0	0	0	0	0	0	0	0	0	0	0	0	0	0	0	0	0	0	0	0	0	10.2696	0	0	0	18.3175	0	0	0	0	0	0	0	0	0	0	15.5577	20.3654	0	0	0	0	61.9016	0
Aurkb	0	0	0	0	0	0	60.5085	0	39.0462	36.7579	0	23.9033	17.0617	0	0	0	0	0	36.8793	0	63.3435	121.148	36.8979	17.8716	0	0	134.416	86.7609	181.077	166.784	34.5015	38.1214	0	43.7728	59.3624	41.1993	52.8763	114.822	69.1802	84.2414	81.3274	97.0093	76.2698	16.0665	70.7416	26.0173	49.7025	128.298	0
Aven	0	0	0	0	39.5917	49.3596	0	0	0	0	41.4676	26.5176	15.6276	0	101.587	35.296	67.8952	49.6477	0	0	172.941	0	79.3399	46.2472	47.8332	45.4469	0	0	55.1722	24.3386	49.039	102.959	130.891	0	36.236	36.8687	124.298	0	186.394	408.11	103.28	116.28	0	0	0	21.3985	54.9454	38.7743	121.898
Avl9	0	0	0	0	0	0	0	0	0	0	0	0	0	0	0	0	0	0	0	0	0	0	0	0	0	0	0	0	0	0	0	0	0	0	0	0	0	0	0	0	0	0	0	0	0	0	0	3.19217	0
AW146154	0	0	0	0	0	0	0	0	0	0	0	0	0	0	0	0	0	0	0	0	0	0	0	0	0	0	0	114.067	0	0	0	0	0	0	0	0	0	0	0	0	0	0	0	0	0	0	0	0	0
AW209491	0	0	0	0	0	0	0	0	0	0	0	0	0	0	35.3938	0	0	0	0	0	0	0	0	0	0	0	0	0	0	0	0	0	0	0	0	0	0	0	0	0	0	0	0	0	0	0	0	0	0
B230118H07Rik	0	0	0	0	0	0	0	0	0	0	0	0	0	0	33.8194	67.1644	0	0	0	0	91.7481	44.3403	7.39517	0	0	0	0	0	0	0	0	0	0	0	0	0	0	0	0	0	0	0	0	0	24.223	0	0	0	0
B230219D22Rik	0	0	424.846	0	0	0	92.1208	74.1152	101.902	82.5817	104.791	112.401	36.1178	46.0185	43.265	46.4056	113.637	122.09	0	18.7229	62.6338	79.5354	74.3611	99.5015	101.428	106.037	88.0158	69.8902	61.4725	54.8085	46.0103	0	45.3855	49.2955	100.442	201.053	144.595	68.7673	92.0037	129.491	96.1888	163.983	7.01735	46.7503	68.4436	20.1137	78.7692	43.1005	33.6474
B2m	215.38	71.4956	316.209	1445.89	631.502	165.523	536.111	227.124	264.059	135.74	289.915	175.924	142.848	319.248	170.996	121.347	384.684	257.632	343.006	173.336	232.693	74.2236	267.835	380.534	101.04	143.539	224.613	141.179	350.709	140.208	84.8947	70.8135	101.421	203.272	247.302	264.545	86.4734	134.058	193.6	81.1562	219.633	199.415	218.797	193.785	125.665	57.5891	48.9384	231.159	724.427
B3gat1	0	0	0	0	0	0	0	0	0	0	0	0	0	0	0	0	0	0	0	0	0	181.731	0	0	0	0	0	0	0	0	0	0	0	0	0	0	0	0	0	0	0	0	0	0	0	0	0	0	0
B3glct	0	0	0	0	73.5462	35.3851	0	0	45.1642	33.1472	43.969	40.1353	3.81756	0	65.9476	51.5184	14.9351	15.0395	23.0329	34.8605	22.7117	112.65	21.2814	21.1023	0	0	7.65185	10.4541	0	0	26.7934	16.7521	25.964	0	26.4636	32.0173	96.0089	32.5436	14.2704	19.4737	77.5285	78.6651	0	0	38.6187	25.7475	44.5075	30.084	0
B3gnt8	0	0	0	0	0	0	0	0	0	0	0	0	0	0	0	0	0	0	0	0	0	0	0	0	0	0	0	0	0	0	0	0	0	0	0	0	0	0	0	0	0	0	0	0	0	0	0	5.01411	0
B4galnt1	0	0	0	0	0	0	0	0	0	0	0	0	17.2864	11.0256	0	0	0	0	25.7395	0	0	0	0	0	0	0	0	0	0	0	0	0	0	0	38.8861	0	0	0	0	0	0	0	216.701	216.636	164.024	165.478	131.21	234.359	0
B4galt1	29.8498	0	0	0	0	0	0	0	0	0	0	0	0	0	0	0	0	0	0	0	0	0	0	0	0	0	0	0	0	0	0	0	0	0	0	0	0	0	0	0	0	0	0	25.0753	15.8085	28.8896	0	52.1897	0
B4galt6	0	0	0	0	0	0	0	0	11.8467	0	0	0	0	13.2982	0	0	0	0	0	0	0	0	0	0	0	0	0	0	0	0	0	0	0	0	0	0	0	0	0	0	0	0	0	0	0	0	0	0	0
B4gat1	41.9687	0	98.4031	0	25.8537	59.4828	0	0	0	0	0	0	0	0	0	0	0	0	0	0	0	0	0	0	0	0	0	0	0	0	0	0	0	0	0	0	0	0	0	0	0	0	0	0	0	0	105.097	0	0
Babam1	147.117	0	206.323	0	122.724	114.705	77.0156	87.24	118.467	106.429	101.816	93.2814	112.266	216.236	49.7971	65.0014	111.033	120.045	133.179	65.6968	89.3337	141.266	109.918	136.373	93.8382	53.596	80.1349	116.327	0	8.53789	36.8468	110.361	101.043	88.0803	73.5746	54.9723	51.2683	47.3251	0	61.8991	62.3767	101.062	114.363	36.7416	39.1662	70.4837	136.768	80.1378	205.755
Bach2	0	0	0	0	0	0	0	0	0	0	0	0	0	0	0	0	0	0	0	0	0	0	0	0	0	0	25.8798	61.4169	75.8465	0	0	0	0	0	0	0	0	0	0	0	0	0	0	0	0	0	0	0	0
Bag1	140.285	43.234	0	193.056	82.4715	48.9741	152.467	0	149.263	250.316	71.1779	97.8198	105.758	156.801	114.988	123.325	114.672	76.3025	173.97	176.089	113.621	88.7385	81.9512	89.0473	177.604	208.86	136.021	97.9803	83.3321	50.4677	120.982	81.7784	26.0733	130.874	76.2997	88.7247	248.686	231.594	111.82	97.3411	160.002	116.404	71.456	64.3995	60.4776	102.802	94.4247	100.057	50.9007
Bag2	39.5367	0	0	213.103	48.0916	55.0972	81.6896	71.7344	117.514	97.3527	66.4859	54.8463	34.8473	39.4578	92.6534	91.9727	40.4385	62.012	15.1337	115.128	95.2732	0	59.4675	65.2444	0	0	92.9737	79.0998	86.0743	65.9748	39.7517	56.8228	66.2057	77.7455	134.326	92.4017	168.869	129.26	191.53	218.206	100.311	108.234	86.4753	107.283	84.1973	45.4787	24.3103	52.3557	50.5965
Bag3	0	0	0	0	49.2641	28.7372	0	0	0	0	33.7685	19.1396	0	0	55.9082	18.7237	0	0	0	0	0	0	0	0	0	0	0	0	0	0	0	0	0	0	0	5.94894	0	60.0779	77.1502	91.2725	26.4641	27.7607	0	0	59.7462	32.6962	0	36.8321	0
Bag4	112.333	0	0	0	0	26.541	0	0	60.2301	87.0031	37.9984	36.1113	46.6495	29.9249	44.8003	65.2556	64.298	46.4889	12.2419	35.3886	73.3935	0	45.804	29.0559	57.3303	35.9185	36.5786	68.0994	0	10.3447	57.5827	9.18552	117.729	12.3054	82.2953	50.6492	60.3543	87.7572	77.9953	75.9199	83.5305	69.1475	0	144.355	73.3238	35.5048	224.673	53.8237	32.7997
Bag5	151.979	117.034	216.645	0	59.6761	78.9064	40.7826	108.247	144.392	139.023	263.357	134.264	163.64	97.8442	236.75	222.264	110.503	224.172	174.393	208.586	187.379	142.953	252.157	248.998	23.3343	41.215	179.476	159.712	245.347	46.7978	184.383	107.562	278.786	98.5211	303.499	111.1	85.3927	148.44	160.444	206.718	180.858	156.213	110.211	223.867	203.963	137.479	227.786	144.907	117.042
Bag6	0	0	0	0	136.604	0	198.171	111.003	181.79	234.653	154.175	142.674	138.271	47.4216	142.359	95.3803	193.137	143.175	205.787	155.986	159.111	183.952	174.813	163.812	67.7553	72.7315	234.631	259.268	157.26	281.27	235.834	236.996	161.416	173.004	196.944	256.253	326.463	260.321	266.264	250.04	230.435	265.925	232.68	90.1988	90.9406	95.7728	312.733	194.701	0
Bahd1	0	0	0	0	0	0	0	0	0	0	0	0	0	0	0	0	0	0	0	131.497	0	0	0	0	0	0	0	0	0	0	0	0	0	0	0	0	0	0	48.122	59.4459	0	19.6091	0	0	0	0	61.3197	0	0
Baiap2	0	0	0	0	0	0	0	0	0	0	0	0	0	0	0	0	0	0	0	0	0	119.562	46.4827	54.1218	0	45.0892	21.0514	14.7553	0	0	19.6672	0	0	0	0	0	0	0	0	0	0	0	0	0	0	0	0	29.2965	0
Bak1	0	0	0	0	28.836	44.1821	0	0	0	0	26.3114	29.3796	38.5343	0	31.7349	32.4786	24.5756	22.3593	0	0	28.14	45.048	22.0644	64.1463	0	0	49.5429	29.2155	37.9001	67.9503	23.0184	21.7527	0	0	23.7404	47.9396	0	0	0	0	18.9743	21.5338	0	27.4774	38.2799	47.8312	0	36.8573	24.6787
Banf1	469.45	520.498	608.002	1066.71	649.585	590.915	833.474	802.457	641.092	856.58	373.813	408.534	500.834	484.494	484.294	469.653	333.507	367.947	488.075	982.043	208.72	350.47	314.172	359.419	561.727	701.614	340.291	321.321	228.179	257.119	711.422	503.619	409.589	698.857	298.242	270.802	412.261	1031.73	457.493	485.842	279.854	371.987	513.255	247.285	205.212	398.813	406.906	355.693	359.741
Banp	0	0	0	0	0	0	0	0	0	0	15.0085	0	0	0	0	0	8.98245	49.1661	0	0	0	0	0	16.0384	0	0	33.8622	25.2585	0	0	0	0	0	0	0	0	0	0	0	0	0	0	0	0	0	0	0	7.95127	0
Bap1	0	0	0	0	0	0	0	0	0	0	0	0	0	0	0	0	0	0	0	0	0	0	0	0	0	0	0	0	0	0	0	0	0	0	0	0	0	0	0	0	0	0	0	0	0	0	49.0789	4.70553	0
Basp1	561.393	272.603	292.012	246.855	211.793	160.153	163.672	218.323	157.011	191.942	88.1188	205.944	221.079	271.125	120.723	155.031	109.928	47.6214	305.109	160.152	98.1394	109.365	201.713	145.219	260.784	177.539	89.4217	51.5758	174.977	120.88	165.53	202.1	182.35	292.621	24.351	99.0504	26.7903	24.893	0	0	0	0	0	74.0224	56.1188	28.8651	163.999	2.31939	706.767
Bax	0	0	0	0	39.8803	18.9832	39.8525	17.3894	0	0	96.0473	62.4261	51.2271	311.68	43.8879	14.4822	53.6701	95.4342	112.463	39.7936	35.8766	78.4462	58.2465	112.405	191.509	161.788	124.736	136.881	104.113	47.0588	111.268	123.629	52.4983	137.441	128.086	76.0444	183.971	129.871	0	0	76.0299	100.786	77.6409	31.5326	60.3138	66.4264	36.3935	73.7038	84.8782
Baz1a	0	302.342	0	0	0	0	0	0	0	0	0	0	147.219	0	231.444	257.333	61.273	70.2548	100.024	261.349	233.83	281.635	50.351	91.9884	111.386	0	170.697	87.2317	74.4725	109.832	313.25	192.164	185.889	148.642	118.928	196.579	352.146	431.003	145.993	196.642	272.953	328.658	490.065	365.224	368.626	294.912	330.861	472.312	0
Baz1b	0	608.163	554.83	0	524.136	415.006	554.87	646.251	377.349	470.339	575.742	574.854	359.067	211.388	561.957	571.138	679.476	698.059	784.492	716.721	498.392	539.582	668.768	670.003	778.524	640.634	778.931	743.131	727.15	669.251	781.074	652.503	598.314	863.71	947.958	918.293	728.844	670.267	635.371	841.147	863.046	800.129	655.3	770.745	657.455	794.817	590.677	750.971	599.438
Baz2a	0	0	0	0	0	0	0	0	0	0	0	0	0	0	0	0	0	0	0	0	0	0	0	0	0	0	0	0	0	0	0	126.179	0	0	0	0	0	0	0	0	0	0	0	62.6153	144.956	0	0	53.3764	0
Baz2b	0	0	0	0	0	0	0	0	0	0	0	100.34	0	38.1195	72.7827	139.714	0	148.298	277.894	0	65.9727	0	195.152	45.3334	75.04	0	0	0	0	87.9777	64.8637	0	0	171.814	0	0	239.851	0	0	0	0	0	134.457	0	50.5539	0	96.1875	124.571	0
Bbs7	0	0	0	0	0	0	0	0	0	0	0	0	0	0	0	0	0	0	0	0	0	0	0	0	0	0	0	0	0	0	0	0	0	0	0	0	0	0	0	0	0	0	0	0	0	0	208.75	0	0
Bbx	0	0	0	0	0	0	0	0	0	0	0	0	0	0	24.5109	58.8621	0	27.955	0	0	225.238	215.702	37.2623	62.9868	0	0	0	0	0	0	72.2521	0	0	0	0	0	0	0	0	0	0	0	0	0	0	0	0	0	0
BC003965	0	0	0	0	0	0	0	0	0	0	0	0	0	0	0	0	0	0	0	0	15.5226	11.5223	0	0	0	0	0	0	0	0	0	0	0	0	0	0	0	0	0	0	0	0	0	0	0	0	0	0	0
BC004004	0	0	0	0	0	0	0	0	0	0	0	0	0	0	0	0	0	0	0	0	0	0	0	0	0	0	0	0	0	0	0	0	0	0	0	0	0	0	0	0	0	11.0889	0	0	0	0	0	11.3791	0
BC021614	0	0	0	0	0	0	0	0	0	0	0	112.185	0	0	0	0	0	0	0	0	0	0	0	0	0	0	0	0	0	0	0	0	0	0	0	0	0	0	0	0	0	0	0	0	0	0	0	0	0
BC024063	0	0	0	0	0	0	0	0	0	0	0	0	0	0	0	0	0	0	0	0	0	0	0	0	0	0	0	0	0	0	38.8957	0	0	0	0	0	0	0	0	0	0	0	0	0	0	0	0	0	0
BC024139	51.2051	0	0	0	0	0	142.692	157.557	77.7991	43.8985	0	0	15.2363	0	47.32	63.4132	0	0	0	53.1333	34.9753	0	0	0	0	36.3712	0	0	0	0	70.4208	0	55.5146	0	0	16.4536	0	120.229	0	0	0	0	0	0	34.4307	52.6095	53.3777	15.0674	0
BC029214	24.5738	0	83.0349	21.2795	45.2686	178.846	0	0	18.8247	43.9775	19.6167	10.3779	38.8816	33.394	19.6808	42.6555	19.916	49.4891	27.1109	37.0038	84.3858	132.58	38.7674	42.3389	0	0	0	0	66.8909	0	22.5255	13.2938	76.5337	0	1.99792	0	0	0	0	47.0606	10.6746	34.0645	54.6396	32.1928	28.1385	8.91764	60.1332	8.63697	46.7728
BC037034	0	0	0	0	0	0	0	0	0	0	0	0	0	0	0	0	21.432	23.5828	0	0	0	0	0	26.7792	0	0	0	0	0	0	0	0	0	0	0	0	0	0	0	0	24.8133	48.4189	0	0	47.3965	31.7219	0	8.58962	0
BC052040	0	0	0	0	0	0	0	0	0	0	0	0	0	0	0	0	0	0	0	0	0	0	0	0	0	0	0	0	0	0	0	0	0	0	0	0	0	0	0	0	0	0	0	33.0642	31.0326	0	0	17.6434	0
BC055324	0	0	0	0	0	0	0	0	0	0	0	0	0	0	0	0	0	0	125.985	0	0	0	0	0	0	0	0	0	0	0	0	32.1061	0	44.7479	0	0	0	0	0	0	0	0	0	0	32.846	0	28.5536	0	0
Bcam	0	0	0	0	0	0	0	0	0	0	0	0	0	0	0	0	0	8.84565	84.7184	37.948	0	0	11.2424	31.9251	0	0	0	0	0	0	0	0	0	0	0	0	0	0	0	0	0	0	0	0	0	0	0	0	0
Bcan	0	0	0	0	30.5009	141.92	0	0	0	0	30.1901	92.1472	0	0	0	0	15.4782	42.6097	0	0	0	0	53.1311	18.3836	0	0	41.4418	90.9204	43.0342	0	0	0	0	0	22.1889	34.9349	0	0	0	0	79.7461	17.6002	0	0	0	0	0	15.8126	0
Bcap29	0	0	0	0	0	0	0	78.0366	50.4112	77.8976	289.133	751.674	0	485.795	91.1891	218.595	21.709	202.391	0	107.343	128.121	41.1355	121.59	68.167	85.7292	242.977	911.891	333.582	0	0	66.2844	0	0	0	91.8404	41.2052	96.3126	565.744	0	0	60.1475	79.9243	0	140.556	101.496	69.8365	63.7167	37.3099	0
Bcap31	41.3085	0	0	0	78.3282	0	0	0	4.27356	44.2844	57.4809	119.099	49.1095	72.0055	57.8506	51.6738	130.872	163.094	72.1436	135.867	119.47	142.361	203.425	152.984	301.118	240.852	55.2167	16.4193	0	0	125.668	103.889	44.4566	167.744	319.395	255.357	150.836	40.3408	0	0	208.112	168.482	131.98	0	59.7502	119.142	0	157.203	118.297
Bcas1	0	0	0	0	0	0	0	0	0	0	0	0	0	0	0	0	0	0	0	0	0	0	0	0	0	0	0	0	0	0	0	0	0	0	0	0	0	0	0	282.098	0	0	0	0	0	0	0	0	0
Bcas2	287.576	240.259	165.158	396.989	51.5813	156.041	176.097	132.048	225.097	242.879	261.925	218.494	168.953	156.564	276.594	224.551	338.711	270.258	81.0938	177.745	262.708	256.505	236.596	269.775	318.957	308.501	211.938	221.433	112.554	90.829	203.931	120.67	177.02	99.6493	342.22	308.344	291.738	128.753	426.709	446.981	317.807	352.973	126.852	187.786	217.72	191.561	147.247	288.848	191.001
Bcas3	0	0	0	0	0	0	0	0	0	0	16.9199	0	0	0	92.4135	72.6197	24.323	59.2917	95.808	16.6564	48.5776	37.6915	47.9637	134.198	0	87.5125	0	0	0	0	73.3319	127.335	64.7201	115.355	43.4176	78.2016	45.625	65.7969	0	0	77.7492	131.926	105.263	93.8633	107.045	73.4704	23.2628	98.5837	0
Bcat1	0	0	0	0	0	0	0	0	0	0	0	0	0	0	0	0	0	0	0	0	0	0	0	0	0	0	18.4068	24.4552	0	0	0	0	0	0	0	0	0	0	0	0	0	0	0	0	0	0	0	0	0
Bcat2	0	0	0	0	230.982	210.161	81.4406	0	46.8712	77.2165	177.292	219.63	75.3274	81.7413	69.15	78.1356	176.615	103.279	110.604	64.1375	54.3879	97.1206	123.625	146.728	0	0	57.5285	97.3164	52.8443	34.8336	109.309	52.7054	0	99.5065	189.202	202.139	132.774	42.0137	0	0	175.963	187.727	176.422	126.261	66.4865	108.181	53.0587	235.214	38.1854
Bccip	69.3525	73.9433	0	0	42.3513	33.0747	91.8417	72.2175	84.1706	91.4155	88.4054	98.1974	65.1062	50.2363	130.694	109.57	104.771	75.8608	66.7733	69.0883	95.47	84.5161	111.747	116.563	122.541	173.273	144.232	220.362	73.4458	97.3751	108.523	131.802	50.544	93.5676	114.657	161.843	230.448	124.52	77.4319	21.0389	125.097	130.174	83.777	76.3989	87.5189	49.4279	0	93.233	235.931
Bckdha	167.379	266.98	288.203	196.737	159.547	230.871	86.9577	143.376	135.231	270.09	188.266	138.779	105.324	138.698	230.902	226.415	205.623	113.847	165.11	181.422	164.088	50.3087	163.646	144.291	46.5945	0	212.932	71.5445	144.125	215.632	151.278	111.78	136.748	163.697	184.617	189.994	129.568	81.0449	111.482	98.7124	158.65	171.14	117.683	144.287	161.049	119.525	154.275	122.633	83.983
Bckdhb	0	0	0	0	0	0	0	0	0	0	39.1264	70.6621	44.1911	25.4162	66.9395	99.8976	72.2354	24.5519	109.635	16.7416	61.4469	62.2511	35.1495	56.3224	0	0	71.9068	22.0296	0	38.5597	93.711	41.6129	0	62.0566	71.6715	29.7413	0	0	0	0	71.3863	53.9221	110.108	66.0949	46.0828	53.7288	23.6443	82.761	0
Bckdk	0	0	0	0	0	0	0	0	0	0	0	0	11.2037	6.36613	0	0	0	0	0	0	0	0	0	0	0	0	0	0	0	0	0	0	0	0	0	0	0	12.6539	0	0	0	0	0	0	0	0	0	0	0
Bcl10	0	0	0	0	0	0	0	0	0	0	0	0	19.7719	77.5939	114.619	63.8929	38.6686	58.5276	0	0	34.6439	65.3214	35.6337	45.1558	0	0	0	18.2728	0	0	65.3962	92.3469	38.596	0	74.1081	7.6101	0	0	0	0	0	0	0	0	0	0	0	11.7522	0
Bcl11a	0	0	0	0	0	0	0	0	0	39.5121	134.958	108.656	20.7893	0	194.097	210.194	110.869	86.4575	757.807	76.6796	240.911	365.627	196.76	226.474	219.561	210.201	467.027	596.118	40.6214	79.237	225.441	406.359	82.5928	454.699	112.966	107.883	370.974	347.74	158.352	124.748	378.381	415.365	0	0	0	0	0	45.0935	50.2406
Bcl2	0	0	0	0	0	0	0	0	0	0	0	0	0	0	0	0	0	0	0	0	0	0	3.85547	0	0	0	0	0	0	0	0	0	0	0	0	14.2928	0	0	0	0	0	0	0	0	0	0	0	14.7501	0
Bcl2l1	0	0	0	0	22.7511	57.1889	0	0	0	0	33.686	39.7306	0	0	0	0	16.0123	13.3742	0	0	25.24	9.38232	0	0	0	0	0	6.45788	0	0	0	0	0	0	0	0	0	0	0	0	0	0	0	0	15.8193	0	0	5.76805	0
Bcl2l11	0	0	0	0	0	0	0	0	0	0	0	0	0	0	0	0	0	0	0	0	0	0	0	0	0	0	0	0	0	0	0	0	0	0	0	0	0	0	0	0	24.5395	0	0	0	0	0	0	21.6198	0
Bcl2l13	88.4678	195.336	106.689	161.429	178.633	204.545	204.091	110.771	190.836	180.397	115.641	258.695	131.885	58.9227	121.843	81.256	111.352	115.306	71.906	191.264	142.077	89.4601	92.0864	115.867	108.136	169.481	126.665	138.048	115.362	204.379	157.906	124.83	179.393	75.2904	63.8539	156.57	319.78	295.454	95.0076	134.836	254.032	133.499	86.7058	121.294	155.04	119.851	227.145	110.365	152.728
Bcl7a	0	0	0	0	0	0	0	0	0	0	8.79838	0	10.0662	18.361	0	0	0	0	0	0	0	0	14.9786	13.7956	0	0	0	0	0	0	0	0	0	0	0	0	0	0	0	0	0	4.47865	0	0	6.30671	0	0	0	0
Bcl7b	0	0	0	0	0	0	0	0	4.49086	0	23.8634	15.4155	19.0112	4.70748	0	15.0273	0	0	26.7908	0	29.9936	16.9755	17.5627	13.9937	15.5248	0	0	0	0	0	50.8461	15.9243	0	0	21.9838	13.9801	0	0	0	0	0	0	0	37.382	16.8848	0	15.51	0	0
Bcl7c	0	0	0	0	98.0983	98.1117	0	0	0	0	93.8123	80.7556	0	0	57.7737	18.8015	52.8385	38.2629	0	0	0	0	72.1642	77.0398	0	0	48.4329	42.5631	140.217	183.642	0	45.1402	0	0	76.3055	69.1366	0	0	0	0	86.8765	44.7231	0	0	0	51.8896	0	113.405	0
Bcl9	0	0	0	0	0	0	0	0	0	0	0	0	0	0	0	0	0	0	0	0	103.43	0	0	0	0	0	0	0	0	0	0	0	0	0	0	0	0	0	0	0	0	0	0	0	0	0	0	0	0
Bcl9l	0	0	0	0	0	0	0	0	0	0	0	0	22.7255	0	0	0	29.0506	0	0	0	73.1274	151.202	16.9755	0	0	0	0	0	20.3819	15.3317	0	0	0	0	0	0	0	0	0	0	0	0	0	0	0	0	0	0	0
Bclaf1	0	69.3207	382.395	587.162	246.059	198.578	151.686	202.03	531.107	341.796	444.99	415.829	67.1145	119.632	270.973	325.722	432.796	346.22	388.822	158.288	465.898	442.121	435.634	333.644	427.633	498.634	339.768	212.081	336.646	199.438	435.684	356.901	325.557	325.831	561.883	466.16	357.469	357.584	316.708	409.12	405.682	458.932	205.348	130.571	186.305	126.304	105.238	209.297	302.832
Bco2	0	0	0	0	0	0	0	0	0	0	0	0	0	0	0	0	0	0	0	0	0	15.2296	0	0	0	0	0	0	0	0	0	0	0	0	0	0	0	0	0	0	0	0	0	0	0	0	0	0	0
Bcor	0	0	0	0	0	0	0	0	0	0	0	0	61.792	21.7416	294.645	182.314	429.897	0	0	0	201.107	365.983	222.674	0	0	0	0	0	0	0	199.39	399.048	146.12	306.612	181.604	354.395	81.6478	0	0	82.0031	211.245	187.065	386.236	371.891	504.039	111.191	246.768	463.199	0
Bcr	0	0	0	0	0	217.46	224.836	114.944	121.591	0	0	0	65.5881	163.781	61.0657	105.84	0	0	114.164	0	207.482	206.473	38.5686	78.3838	260.447	184.883	71.6907	78.3498	0	157.134	37.4231	0	0	66.1925	0	0	0	0	0	0	0	0	0	0	0	0	84.2517	28.7545	0
Bcs1l	0	0	0	0	0	0	0	0	15.7647	0	28.1809	0	4.90724	0	56.3813	50.736	26.3233	28.0993	45.8808	19.8774	37.5923	76.76	5.03277	13.2513	0	0	0	0	0	0	95.7161	106.904	0	33.7319	25.3624	0	0	0	0	0	0	0	55.0866	63.3355	64.613	47.8881	90.5147	49.0176	42.9931
Bdh1	0	0	0	0	12.7917	182.535	0	0	0	0	51.4436	44.7926	11.1052	0	31.5347	104.869	42.3093	42.5089	0	143.762	24.4706	15.2443	47.1225	0	63.2926	31.4361	144.993	203.166	161.785	145.472	0	0	0	0	0	0	0	18.8315	0	0	28.4737	74.6043	0	0	0	0	0	0	0
Bdh2	0	0	0	0	27.2965	30.472	0	0	0	0	0	0	0	0	0	0	11.6698	21.5055	0	0	0	0	0	16.496	0	0	0	0	0	0	0	0	0	0	0	0	0	0	0	0	0	0	0	0	0	0	0	0	0
Bdkrb1	0	0	0	0	0	0	0	0	0	0	0	0	46.5754	0	0	0	0	0	0	0	0	0	0	0	0	0	0	0	0	0	0	0	0	0	0	0	0	0	0	0	0	0	0	0	0	0	0	0	0
Becn1	0	0	0	0	0	0	30.8505	36.1955	98.2148	116.687	0	0	27.9165	0	21.5337	0	0	0	131.314	0	111.296	118.99	0	0	0	0	0	0	0	0	96.0476	65.7349	56.0599	28.2074	0	0	0	0	0	0	37.4068	0	35.3041	67.0234	62.3136	50.5041	89.8475	56.532	0
Begain	0	0	0	1276.88	0	0	0	0	0	0	0	0	0	0	0	0	0	0	0	0	0	0	0	0	0	0	0	0	0	0	0	0	0	0	0	0	0	0	0	0	0	0	0	0	0	0	0	0	0
Bend3	0	0	0	0	0	0	0	0	0	0	0	0	0	0	0	0	0	0	0	0	0	0	0	0	0	0	0	0	0	0	0	0	0	0	0	0	0	0	0	0	0	0	0	0	157.309	0	0	0	0
Bet1	0	0	0	0	0	0	0	0	0	0	0	0	17.9674	0	16.5623	15.107	12.7852	11.5245	0	19.1842	0	0	14.8073	7.55026	0	0	19.097	18.8387	44.0155	14.2811	0	0	0	0	20.7389	21.2243	0	0	0	0	10.2784	21.2119	28.1513	14.5571	11.457	37.6535	30.2307	28.1051	0
Bet1l	0	0	0	0	0	0	0	0	0	0	0	0	0	0	0	0	0	0	0	0	10.5979	20.3179	0	0	0	0	0	0	0	0	0	0	0	0	0	0	0	0	0	0	0	0	0	0	0	0	0	0	0
Bfar	0	0	0	0	0	0	0	0	0	0	0	0	0	0	0	0	0	0	0	0	0	0	0	0	0	0	0	0	0	0	0	0	0	0	0	0	0	0	0	0	0	0	0	0	8.38596	0	0	0	0
Bfsp2	0	0	0	0	0	0	0	0	0	0	0	0	0	0	0	0	0	0	0	0	0	0	0	0	0	0	40.1081	0	0	0	0	0	0	0	0	0	0	0	0	0	0	0	0	0	0	0	0	0	0
Bgn	0	0	0	0	0	0	0	0	0	0	0	0	0	0	0	0	0	0	0	0	0	0	0	0	0	0	0	0	0	0	0	0	0	0	0	0	0	0	0	0	0	0	0	0	0	0	0	0	0
Bicd2	0	0	0	0	0	0	0	0	0	68.6221	18.1968	13.1729	28.0824	30.1014	87.8813	115.754	0	0	0	0	84.5999	81.4692	0	25.6206	0	0	0	0	0	0	41.5795	67.2621	74.6018	0	11.8112	0	0	0	0	0	0	31.2327	59.9187	112.864	72.9847	91.5583	34.9561	96.5502	49.3381
Bicra	0	0	0	0	0	0	0	0	0	0	0	0	13.8813	0	58.6078	24.8944	40.1766	41.208	0	0	29.099	28.2245	0	24.8746	0	0	0	0	0	0	0	0	45.257	0	23.7795	0	0	0	0	0	0	22.0396	0	0	0	0	21.093	31.8146	0
Bicral	0	0	0	0	0	0	0	0	0	0	0	0	0	0	0	0	0	0	0	0	0	0	0	1.91912	0	0	0	0	0	0	0	0	0	0	0	0	0	0	0	0	0	0	0	0	0	0	0	0	0
Bid	98.7694	80.7559	29.3139	93.8549	99.7792	49.8174	52.8777	64.7932	62.726	87.3602	98.825	115.417	76.8918	68.704	98.0031	83.8043	96.8028	116.9	79.964	63.669	30.2386	95.0438	129.293	114.16	160.765	163.453	167.929	106.657	29.3828	78.8191	96.8619	102.22	79.8674	123.712	161.344	124.569	48.7452	75.9926	61.7579	41.3362	134.174	114.206	63.7078	49.8093	81.5362	47.034	77.6415	66.0373	0
Bin1	0	58.9943	0	0	0	0	0	90.0428	106.29	101.438	99.6417	90.6375	191.379	242.6	224.695	249.04	133.236	193.213	359.091	351.419	200.946	210.386	261.069	238.014	816.221	761.825	854.765	840.216	526.852	562.664	356.515	295.325	354.111	347.158	314.288	323.965	38.9834	0	0	0	43.2371	29.6848	66.551	135.086	160.112	140.809	63.3523	98.1654	0
Bin2	696.122	0	1151.4	850.839	538.662	648.07	564.432	555.798	554.582	500.072	694.762	855.841	588.911	496.039	555.732	533.046	607.777	750.837	619.43	607.436	530.948	567.98	615.997	633.361	447.605	328.462	175.311	88.6853	155.39	250.383	522.364	458.971	679.3	518.69	599.776	649.851	181.403	204.527	147.943	176.716	153.294	97.6637	156.333	337.649	387.287	376.89	342.637	246.713	1769.89
Bin3	0	0	0	0	28.8017	41.3813	0	0	0	0	53.0274	4.36978	11.9839	0	65.2243	33.1394	36.558	22.6351	0	0	0	0	17.3869	40.1295	0	0	0	0	0	0	0	0	0	0	0	19.5459	0	0	0	0	0	7.0414	0	20.536	88.172	0	59.6345	33.932	0
Birc5	0	0	0	0	0	0	0	0	0	0	0	19.5224	0	0	0	0	0	0	0	0	0	0	11.1016	3.41119	0	0	0	0	0	0	37.1966	38.9741	0	0	29.7301	27.7386	0	0	0	0	39.2445	49.1058	26.0634	30.9482	25.7941	55.5602	0	51.1532	0
Birc6	0	783.644	768.102	0	0	0	496.687	281.639	479.907	477.264	119.236	160.646	246.003	144.303	343.963	381.243	171.284	181.215	198.367	306.736	469.489	312.412	183.433	87.0677	549.782	252.857	347.698	291.689	518.426	472.254	391.372	213.602	685.816	158.035	220.064	171.148	559.22	296.982	920.115	877.418	309.437	363.197	296.744	453.141	514.133	500.724	848.098	387.027	260.543
Blk	0	0	0	0	0	0	0	32.3005	117.376	0	0	0	0	0	0	0	0	0	0	0	0	0	0	0	0	0	16.8347	0	0	0	0	0	0	0	0	0	0	0	0	0	0	0	0	0	0	0	0	0	0
Blm	0	0	0	0	0	0	0	0	0	0	0	0	27.6491	0	0	0	0	0	0	0	0	0	0	0	0	0	0	0	0	0	25.4429	143.033	0	62.8666	42.5249	16.609	0	0	0	8.38587	88.1776	36.7404	0	0	0	0	160.206	81.6596	0
Blmh	217.589	621.067	460.489	320.773	297.174	207.439	328.08	302.838	322.57	285.408	332.308	349.462	453.363	346.981	238.555	334.111	341.276	227.049	413.49	494.404	174.38	252.668	288.42	326.175	87.9448	237.658	341.022	322.065	348.758	260.145	311.162	278.445	237.244	332.761	178.547	148.793	369.712	437.593	221.238	497.196	280.45	243.195	406.329	227.199	330.493	319.863	266.52	256.077	224.196
Blnk	0	0	0	0	0	0	0	0	0	0	0	0	0	0	0	0	0	0	0	0	0	0	0	0	316.272	293.642	158.856	144.618	111.17	182.196	0	0	0	0	0	0	0	0	0	0	0	0	0	0	0	0	0	0	0
Bloc1s1	0	0	0	0	35.621	0	46.5041	0	0	111.169	18.4815	35.232	0	0	0	21.37	29.2145	26.5708	42.7101	31.9829	0	0	49.4231	28.2407	0	0	31.3361	17.0787	107.898	45.1918	10.6134	27.2277	49.9875	28.3055	25.0693	16.7294	0	0	94.1328	32.2639	47.1058	32.9457	25.6757	32.1968	17.7865	50.2701	0	44.799	0
Bloc1s2	67.4559	0	0	0	0	0	0	0	0	0	0	0	8.60145	24.3976	9.13888	13.6852	0	0	108.752	43.5197	0	0	24.5875	11.7077	123.467	159.218	0	22.5523	0	0	0	55.4137	0	39.0743	6.81265	34.3534	43.6098	0	0	0	0	0	62.3219	50.9439	171.061	18.6142	42.942	19.9972	0
Bloc1s3	0	0	0	0	0	0	0	0	0	0	0	5.9724	12.103	0	28.3687	7.71405	0	0	0	0	50.6905	9.04012	0	0	0	0	0	0	0	0	0	0	0	0	0	0	0	0	0	0	0	0	0	0	0	0	0	0	0
Bloc1s4	0	0	0	0	0	0	0	0	0	0	26.0116	16.8026	0	0	0	29.4671	26.7178	39.6406	31.8832	0	31.3001	42.6991	28.5524	10.4171	0	0	0	0	0	0	0	0	0	35.9752	24.4795	0	0	38.2653	0	0	24.3664	23.7352	0	0	0	6.12039	0	0	0
Bloc1s5	28.9753	0	0	0	103.399	51.8748	32.6499	0	0	0	17.0043	12.0932	14.4051	0	19.4967	0	43.1149	50.2521	0	57.5398	0	0	12.6865	18.1566	0	0	13.7443	52.0272	0	0	9.74171	0	0	9.25234	0	0	49.7352	36.2665	0	0	0	10.1646	16.3432	35.9029	33.484	51.6045	0	31.4758	0
Bloc1s6	0	0	0	0	0	0	0	0	0	0	0	0	0	0	0	0	0	0	0	0	0	67.9655	0	0	0	0	0	0	0	0	0	0	0	0	0	0	0	0	0	0	0	0	0	0	0	0	0	0	0
Blvra	155.473	413.868	433.015	485.098	352.175	480.924	325.717	211.199	392.64	270.87	358.838	251.801	201.286	206.947	162.144	242.399	325.31	330.268	127.914	313.847	65.6298	19.4823	241.939	282.037	145.447	111.704	351.721	398.47	300.182	275.348	155.272	105.656	278.778	175.058	214.767	227.422	219.294	207.32	305.15	351.428	228.055	279.862	112.071	167.845	108.502	200.25	157.18	229.685	328.214
Blvrb	1111.64	518.565	431.334	589.472	461.87	600.464	218.359	221.34	360.032	290.59	449.467	434.353	224.267	176.651	273.761	264.025	279.529	270.815	67.9066	246.942	155.507	222.889	263.71	237.727	127.571	63.7281	219.433	156.708	96.1914	47.6096	307.156	435.459	124.678	296.525	158.241	200.132	1399.5	1179.72	875.636	777.691	1396.98	1428.18	23.2558	34.3191	49.0349	46.647	21.4608	61.9597	428.37
Bmi1	0	0	0	0	0	0	0	0	0	0	0	0	0	0	0	0	24.6959	0	0	0	0	142.685	11.7494	0	0	0	0	0	0	0	0	0	0	36.9581	0	0	0	0	0	0	0	0	0	39.5614	0	7.60098	0	14.1269	0
Bmp1	86.379	0	0	0	0	0	0	0	0	0	0	0	0	0	0	0	0	0	0	0	0	0	0	0	0	0	0	0	0	0	0	0	0	0	0	0	0	0	0	0	0	0	0	0	0	0	0	0	0
Bmp2k	0	0	0	0	0	0	0	19.4351	0	0	0	0	60.997	9.23708	51.8352	8.96366	0	0	128.732	27.2337	0	0	0	0	0	19.5676	0	16.2855	70.1061	11.7677	30.5313	223.541	29.9087	63.8425	7.09428	24.6723	0	15.9295	0	0	0	0	85.5259	22.8349	80.7664	43.6545	56.4773	41.4857	0
Bmper	0	0	0	0	0	0	0	0	0	0	0	0	0	0	0	29.7987	0	0	0	0	0	0	0	0	0	0	0	0	0	0	0	0	0	0	0	0	0	0	0	0	0	0	0	0	0	0	0	0	0
Bms1	0	195.206	0	0	25.2791	90.1205	265.805	129.925	23.7537	41.6073	76.2121	62.0056	28.4851	35.6904	175.157	112.446	11.6569	40.8715	45.2996	77.3662	177.255	119.258	39.3092	30.3496	89.8809	80.5874	77.4675	55.7391	22.7384	68.6437	122	134.283	193.784	93.9939	56.8864	15.2474	166.266	155.342	86.2529	78.7749	96.1079	90.4167	90.9467	163.89	185.568	175.913	238.63	101.121	75.7969
Bnc2	0	0	0	0	0	0	0	0	0	0	0	0	0	0	0	0	0	0	0	0	0	0	0	0	83.8341	0	0	0	158.738	0	0	0	0	0	0	0	0	0	0	0	0	0	0	0	0	0	0	0	0
Bnip1	0	0	0	0	31.0466	0	0	0	0	50.9128	0	54.1819	27.631	0	72.1522	99.7686	19.1562	57.2738	65.9937	0	68.9069	13.4703	39.9366	41.3788	0	0	28.497	0	0	0	65.7779	0	34.5672	44.6233	54.7715	26.9998	139.137	147.213	59.3734	0	46.5619	31.7759	110.067	20.6754	71.6156	69.8531	28.8538	61.7556	0
Bnip3	0	0	0	0	0	0	0	0	0	0	0	0	0	0	34.3246	0	0	0	0	0	0	0	0	0	0	0	0	0	0	0	0	0	0	0	0	0	0	0	0	0	0	0	0	0	0	0	0	0	0
Bnip3l	0	0	0	0	0	0	0	0	57.4486	85.258	33.1	39.5226	10.7659	0	57.6058	89.0984	6.55699	0	0	0	48.0273	104.865	10.2465	7.85472	0	0	0	0	0	0	66.3717	0	0	0	0	23.1781	21.6226	0	0	0	18.8618	13.1197	0	0	0	0	0	21.104	0
Bod1	0	0	0	0	0	0	0	0	0	0	0	0	6.28727	0	11.9885	7.7595	0	0	0	0	0	0	0	0	0	0	0	0	0	0	0	0	0	0	0	0	0	0	0	0	0	0	0	0	0	0	0	0	0
Bod1l	0	0	0	0	132.741	572.94	570.164	884.687	387.089	684.543	216.689	259.018	263.693	210.261	344.573	252.754	300.279	183.212	342.359	269.698	498.674	653.953	133.293	238.523	1389.96	1460.3	249.517	234.717	464.825	251.271	625.114	590.437	426.513	440.699	104.437	278.135	717.563	497.313	374.088	593	278.809	256.89	204.579	499.513	381.588	389.315	440.755	148.469	303.083
Bola1	40.9811	88.0376	229.365	0	114.182	122.137	297.27	93.152	146.801	137.574	105.069	206.128	170.331	89.731	172.986	151.114	75.4595	82.4504	147.388	93.1949	125.669	139.332	105.638	85.3995	166.471	217.976	163.981	192.161	196.176	143.227	127.438	99.7495	203.179	115.811	129.601	141.837	142.49	199.402	86.7349	198.715	127.784	84.7522	122.105	142.988	81.196	95.0855	231.295	151.427	124.374
Bola2	0	0	113.018	159.332	288.44	128.246	38.2998	81.1503	276.118	311.392	126.198	138.957	31.2364	0	93.8032	91.3915	60.3184	97.9396	90.4445	50.65	159.166	201.51	93.9362	108.662	78.2348	121.191	129.005	146.032	51.1062	100.989	159.646	121.419	90.7298	116.487	193.214	322.102	97.3814	86.0421	0	45.0952	89.3236	123.668	79.9898	128.774	86.4859	132.932	105.358	185.985	0
Bola3	0	0	0	0	0	0	0	0	0	0	0	0	0	0	0	0	0	0	0	0	0	0	0	0	0	0	0	0	0	0	0	0	0	0	0	0	0	0	0	0	0	0	0	0	13.0593	0	0	0	0
Bop1	0	0	80.1252	0	64.0482	62.6545	54.4262	162.641	87.5355	33.2111	158.859	99.3914	100.008	72.0588	162.469	162.334	133.312	161.99	89.7245	83.2741	368.903	99.3266	150.591	120.239	109.966	140.811	115.747	66.0668	115.327	141.58	113.816	116.342	82.8529	173.519	261.539	230.877	180.569	146.843	0	108.457	298.737	312.619	147.693	242.104	241.03	276.928	190.368	229.316	0
Bora	0	0	0	0	0	0	0	0	0	0	0	0	0	0	0	0	0	0	0	0	0	0	0	0	0	0	0	0	0	0	0	0	0	0	0	0	0	0	0	0	10.3931	10.0801	0	0	0	0	34.2947	7.71559	0
Borcs5	0	0	0	0	0	0	0	0	0	0	0	0	16.0915	18.5201	38.3498	0	30.9864	42.3585	0	0	0	0	0	0	0	0	0	0	0	47.8231	0	0	77.9785	0	18.2221	34.6322	0	0	0	0	6.4765	77.6416	0	31.2368	44.1401	57.1526	30.6728	61.4724	50.6527
Borcs6	0	0	0	0	0	0	0	0	0	0	0	0	0	0	0	0	0	0	0	0	0	0	0	0	0	0	0	0	0	0	0	148.879	0	0	0	0	0	0	0	0	0	0	21.1926	25.6386	44.7388	0	22.6215	5.39903	0
Borcs7	0	46.1811	133.054	0	0	0	46.1811	40.2106	15.7795	0	0	45.6115	21.6536	35.9361	16.8281	19.4113	43.0504	52.0999	23.1908	62.9231	27.5735	0	30.9604	43.6109	67.314	30.0874	7.11261	0	12.48	22.7788	11.8806	44.0361	26.2441	18.378	22.3635	12.5108	80.695	34.7387	0	0	30.4886	37.9947	23.7502	32.5232	33.7905	24.4054	108.242	31.9344	63.4815
Borcs8	0	0	0	0	0	0	0	0	0	0	0	0	0	0	0	0	0	21.6567	0	0	0	0	0	0	0	0	0	0	0	0	0	0	8.61316	0	0	0	0	0	0	0	0	4.45654	0	0	0	0	0	0	0
Bpgm	0	146.575	193.572	0	0	146.123	39.9213	0	0	0	84.5657	50.015	11.962	0	0	0	72.8372	39.5763	0	0	0	0	20.2701	34.3828	0	0	0	0	0	0	30.1383	0	0	0	0	0	0	0	0	0	0	0	0	0	0	0	0	0	0
Bphl	182.171	207.798	85.2694	211.636	376.203	669.777	226.142	196.765	188.288	182.385	318.343	261.634	99.2479	146.245	202.621	81.8765	215.362	347.954	158.594	339.335	137.039	109.097	236.518	202.067	27.7145	139.101	276.826	309.535	345.961	465.207	94.9304	72.144	189.386	90.6276	252.603	241.257	0	0	50.8039	83.3587	175.333	187.68	108.14	171.36	176.967	195.598	181.1	238.497	394.81
Bpifb9b	0	0	0	0	0	0	0	0	0	0	0	0	0	0	0	0	0	0	0	0	0	0	0	0	0	0	0	0	0	0	0	0	55.025	0	0	0	0	0	0	0	0	0	0	0	0	0	0	0	0
Bpnt1	61.0005	0	0	0	81.3956	58.9604	65.8672	0	80.4734	50.1139	41.932	34.3753	34.7198	74.3793	34.7848	68.7573	43.4073	40.8421	0	145.886	25.2307	29.999	52.0099	42.2977	0	0	119.999	73.7387	54.9199	104.636	37.4703	9.28095	17.1899	0	39.0732	38.4562	0	0	0	0	38.0618	39.243	0	83.1685	115.185	112.885	25.4993	62.3788	110.18
Bptf	0	0	0	0	0	0	0	82.1577	0	67.9108	0	52.8563	29.6361	60.9952	240.486	192.342	49.4416	82.328	116.825	150.772	112.75	344.433	52.7429	104.126	126.225	146.616	138.589	173.645	396.659	203.376	291.84	312.989	168.478	313.849	64.781	91.4715	98.494	212.508	176.219	123.088	148.461	83.2874	200.393	199.803	157.933	183.607	307.182	130.794	0
Braf	0	0	0	0	0	0	0	0	0	0	0	0	0	0	43.7079	72.3382	0	11.4995	0	0	68.7175	52.5544	0	0	0	0	0	0	0	0	0	0	0	0	0	0	0	0	0	0	0	0	0	0	0	22.4074	30.1162	34.469	0
Brap	0	0	0	0	0	0	111.728	0	75.15	100.753	0	0	58.812	20.9155	160.613	89.6173	57.5105	45.7924	99.6375	150.402	154.426	314.297	93.9936	72.1003	69.53	0	65.4812	92.8527	0	0	109.441	52.6354	76.1333	224.635	87.5539	115.403	98.9713	69.2004	0	99.2662	90.119	147.454	0	204.356	188.644	111.78	128.566	69.1751	0
Brat1	0	0	0	0	0	0	0	0	45.1412	0	13.9533	55.1614	39.0818	164.736	47.3331	93.664	113.221	92.3743	91.4972	28.4957	99.8589	48.583	58.7272	61.7149	0	52.9835	87.5219	55.4066	53.8319	56.178	130.715	106.138	139.537	78.1534	70.8296	34.6704	83.1423	175.646	29.8206	0	163.843	77.657	76.7543	0	66.0691	62.9721	91.7322	70.6338	0
Brca1	0	0	0	0	0	0	0	0	0	0	0	0	0	0	0	0	0	0	55.3845	0	120.811	205.605	0	0	68.1817	0	69.9329	37.831	103.072	0	0	0	0	62.6647	0	0	0	0	0	0	5.8535	34.1703	122.252	0	88.8476	0	119.158	28.651	0
Brcc3	96.9172	0	159.194	0	77.953	163.236	89.064	0	129.897	135.28	80.0449	92.3923	117.782	89.6123	92.0138	113.23	118.542	123.5	200.839	180.503	151.898	94.3067	87.5116	133.151	73.9916	22.2101	87.1984	131.242	59.1653	46.5296	133.541	60.1114	74.2097	181.518	14.5521	86.6258	129.508	145.807	0	89.7898	111.997	95.8458	107.138	84.7202	88.3228	85.1333	104.363	75.8817	0
Brd1	0	0	0	0	0	0	0	0	0	0	0	0	0	0	0	0	0	0	44.5363	0	0	0	0	0	0	0	0	0	0	0	45.214	248.427	0	96.3608	0	42.6916	0	0	0	0	43.3243	0	76.4616	183.062	113.784	113.146	66.3583	31.6336	0
Brd2	0	0	0	0	0	0	0	0	0	0	22.8278	0	19.5619	31.0837	66.1894	104.397	36.6555	55.5732	41.9146	87.8369	196.554	131.858	38.6452	71.2949	74.0172	0	85.132	40.6405	166.404	92.3736	158.272	0	79.6157	50.2088	54.5685	93.2609	0	0	0	0	20.3867	43.2578	70.2054	0	24.0242	47.4132	93.6439	77.0052	0
Brd3	0	0	0	0	38.3414	0	113.631	0	114.052	77.4194	111.247	91.8911	186.374	205.03	147.356	118.972	92.1082	93.494	251.677	39.9339	210.92	167.218	101.264	142.373	187.951	89.7319	227.112	210.666	117.986	115.419	269.948	114.263	187.053	136.197	84.7703	265.069	178.125	222.192	0	41.9864	103.588	272.618	98.8742	127.925	43.5827	99.7613	46.0442	277.282	132.898
Brd4	46.7399	0	0	0	146.364	39.404	0	111.07	91.7349	156.262	176.672	270.782	68.7522	86.7087	133.209	228.883	160.197	231.066	157.314	126.958	176.989	401.579	199.12	308.034	236.981	251.83	88.4418	104.753	188.664	146.656	191.598	303.668	255.504	327.84	214.325	185.929	108.143	0	227.048	69.1887	162.273	121.324	207.647	75.609	144.097	77.1952	127.434	97.9721	88.2216
Brd7	0	0	0	0	0	0	0	0	108.48	151.634	0	0	171.243	94.9901	97.6519	173.684	44.0844	75.8629	137.123	0	195.827	152.434	78.8609	114.556	272.931	356.175	24.0072	114.926	0	124.574	280.328	50.021	130.264	110.118	80.1093	86.6422	315.399	318.945	129.809	76.7872	232.916	197.619	117.433	15.0163	110.581	39.4906	110.564	96.8914	0
Brd8	0	0	0	0	85.7594	41.8887	0	0	0	0	58.5395	45.8026	84.887	0	115.19	88.0055	73.4609	63.9295	33.7655	0	149.935	136.661	52.5586	85.9167	0	20.1858	34.9975	81.4576	93.2427	48.0196	10.6041	30.9736	27.0419	55.8444	87.7462	84.6037	0	0	0	0	99.689	59.4783	30.5915	65.8511	117.251	0	40.1847	41.181	0
Brd9	0	0	0	0	0	0	40.1052	0	0	158.358	31.1446	28.5479	0	0	117.627	16.1774	0	21.7188	0	0	54.0166	158.218	47.7036	31.2783	0	0	0	0	0	54.899	0	53.0595	0	53.7378	26.1442	30.6255	0	0	0	0	40.2865	29.6117	0	0	0	0	0	49.2718	0
Brdt	0	0	0	0	0	0	0	0	0	0	0	0	0	0	0	0	0	0	0	0	0	0	60.9794	83.4573	0	0	0	0	0	0	0	0	0	0	0	0	0	0	0	0	0	0	0	0	0	0	0	0	0
Bre	31.7047	236.255	166.63	0	225.778	120.516	176.104	75.0015	109.167	111.89	93.8042	86.6322	95.7392	122.692	110.384	115.191	126.397	149.78	157.36	162.951	171.325	131.782	109.13	151.312	475.992	46.6119	98.0616	113.089	143.948	152.098	99.0405	76.8803	99.2392	102.23	176.228	143.494	94.5443	488.163	85.3436	84.7904	135.593	156.282	136.491	106.313	174.062	101.021	152.931	207.78	87.5376
Brf1	0	0	0	0	0	0	0	0	57.0641	24.4442	0	0	43.0339	0	71.7765	51.7654	0	0	9.11654	51.1298	82.4715	92.6969	0	0	0	0	0	0	0	0	11.965	68.6653	45.9199	40.4079	0	0	155.358	0	0	43.9138	0	5.19212	17.9493	24.1673	69.106	16.4824	49.9399	0	10.8674
Bri3bp	0	51.9857	25.0024	0	188.767	146.046	94.0463	0	97.0338	119.816	58.0041	66.3157	51.9905	41.2509	104.632	84.5468	111.037	36.4311	52.7489	61.1665	126.797	12.3026	33.2046	69.0919	79.2237	0	69.5144	91.289	85.2508	111.595	56.6262	42.9024	80.2224	63.0614	59.0165	99.9828	163.117	99.3002	0	0	87.9596	45.1786	95.741	18.2692	59.4245	74.373	126.29	31.7751	46.0303
Brip1	0	0	0	0	0	0	0	0	0	0	0	0	17.6063	0	77.3684	43.3635	9.10022	28.65	0	0	35.8043	46.2779	0	0	0	0	0	0	0	0	0	18.8488	0	0	0	28.0626	0	0	0	0	0	0	0	75.4386	66.3814	0	0	0	0
Brix1	0	0	0	0	0	0	67.9555	42.1234	116.291	43.9472	42.3409	19.5986	0	17.2263	68.5155	55.2223	0	0	124.132	32.6845	113.779	189.556	58.7809	54.066	47.4877	55.2523	0	0	0	0	68.6624	70.0504	62.4726	61.2896	40.4522	79.6999	60.7142	68.0522	136.78	156.851	70.25	64.6958	42.8113	119.679	31.7728	55.1315	75.2102	17.5228	0
Brk1	252.495	86.939	0	110.38	145.717	81.5794	37.9685	49.0862	77.6911	24.3719	110.499	115.988	83.6262	135.338	72.3545	96.4646	37.7677	51.9632	118.333	132.857	106.107	39.4758	75.3911	127.369	98.7069	63.8087	163.879	90.5564	118.645	76.3989	48.4562	21.502	37.7062	21.5503	61.9572	29.8639	46.3121	103.333	119.092	37.027	44.69	21.904	52.8352	38.6421	45.9351	31.983	42.065	41.2046	33.9035
Brms1	0	0	0	0	0	0	0	0	0	0	0	0	16.2006	5.98153	0	66.4543	22.2667	0	57.8069	0	56.6731	0	29.3752	0	0	0	0	0	0	0	0	65.4852	0	103.78	17.0272	0	0	0	0	0	0	6.3853	162.425	0	0	0	0	16.0304	0
Brms1l	0	0	0	0	25.1606	35.6319	0	0	22.8442	26.0787	10.3445	14.7212	20.461	0	68.3632	47.4117	37.9189	27.2551	0	30.8552	19.1732	0	49.8189	18.5082	0	0	0	0	0	0	0	0	21.2601	0	17.8993	29.7671	0	0	0	0	7.63131	10.7316	0	0	0	0	35.2396	16.7762	0
Brox	0	77.1182	90.2684	0	33.5125	154.982	77.6434	77.4493	64.4414	110.855	61.2086	89.5091	94.1739	181.718	62.2201	24.4754	83.1558	94.6141	142.5	88.0545	0	39.6361	108.379	94.2229	35.1887	50.5221	135.769	112.326	85.9306	108.494	66.4211	72.7223	32.8787	61.376	24.826	21.3312	43.4819	83.6776	142.644	24.3465	10.9276	32.2144	19.1697	60.9019	42.7977	54.1606	40.4841	52.0915	101.01
Brpf1	0	0	0	0	0	0	0	0	0	0	0	0	0	0	0	0	30.3695	0	0	0	76.3455	0	0	0	0	0	0	0	0	0	0	0	0	0	0	0	0	0	0	0	0	0	134.132	0	0	0	0	53.2354	0
Brpf3	0	0	0	0	0	0	0	0	0	0	0	0	0	0	0	0	0	39.9291	0	0	0	0	0	0	0	0	0	0	0	0	0	0	0	0	0	0	0	0	0	0	0	10.882	0	0	0	0	0	0	0
Brwd1	0	0	0	0	0	0	0	0	0	0	0	0	0	0	0	0	0	0	0	0	0	0	0	0	0	0	0	0	0	0	0	0	0	0	0	0	0	0	0	0	0	81.2864	0	0	0	0	0	0	0
Bsdc1	0	0	0	0	0	0	0	0	0	0	8.82935	9.14319	0	0	54.2049	25.953	0	0	0	0	76.3801	22.8782	16.5742	0	0	0	0	0	0	0	52.5283	11.1101	0	0	0	0	0	0	0	0	0	0	0	62.3348	11.2855	12.3379	35.192	0	0
Bsg	75.817	53.9784	35.1479	245.162	69.5137	51.1521	108.499	133.193	124.582	168.97	11.542	62.9874	37.3403	37.1904	52.052	35.5943	16.8993	29.1093	54.1884	42.6474	16.2185	34.4954	17.1205	19.0309	91.8435	125.691	37.8	59.3378	52.8184	42.9031	40.7979	86.3727	123.505	15.1856	62.9003	53.2756	336.946	319.932	126.927	342.369	227.412	181.155	39.8233	55.5209	55.849	55.679	22.0955	65.5861	72.0126
Bsn	0	0	0	0	0	0	0	0	0	0	0	0	0	0	0	0	0	0	0	0	0	0	0	0	0	0	0	0	0	0	96.4166	0	0	0	0	0	0	0	0	0	0	0	0	0	0	0	0	0	0
Bst2	0	0	0	0	29.3839	23.5578	0	0	0	0	8.63058	0	9.68988	8.23873	18.2049	13.3494	6.31627	0	0	0	14.4742	0	0	0	0	0	21.101	45.4657	0	9.69699	33.1759	0	0	0	0	0	0	0	0	0	18.1749	19.0793	0	0	0	0	0	15.9957	0
Btaf1	0	0	0	0	74.1007	0	55.7851	142.185	45.7473	61.7315	138.048	89.5262	105.986	14.1291	137.749	87.5505	88.9935	112.814	0	164.356	158.13	93.9123	111.65	119.146	0	0	132.001	170.491	152.633	148.322	308.72	197.023	99.2471	126.595	117.601	88.3519	312.811	336.894	98.5722	232.796	218.221	221.454	183.128	118.643	157.296	248.547	329.705	251.762	0
Btbd7	0	0	0	0	0	0	0	0	0	0	0	0	0	0	0	0	0	0	0	0	0	0	0	0	0	0	0	0	0	0	0	0	0	0	0	0	0	0	0	0	0	0	74.7532	0	0	0	0	0	0
Btbd9	0	0	0	0	0	0	0	0	0	0	0	0	0	0	0	0	0	0	0	0	0	29.8702	0	0	0	0	0	0	0	0	0	0	0	0	0	0	0	0	0	0	0	0	0	0	0	0	0	0	0
Btd	0	0	0	0	0	0	0	0	0	0	0	0	27.5205	0	0	0	61.7886	20.1751	0	0	0	0	27.5578	20.6232	0	0	0	0	0	0	0	0	0	0	14.459	18.5077	0	0	0	0	0	0	0	0	0	0	0	57.8827	0
Btf3	239.512	264.033	86.5033	270.684	130.447	168.388	192.376	216.674	319.834	319.877	293.866	305.411	189.025	329.357	338.945	431.206	248.221	252.923	260.825	164.808	320.169	340.022	234.757	278.11	589.713	596.909	332.13	305.189	492.142	382.303	153.772	161.035	435.275	242.234	462.118	539.311	330.121	480.807	570.243	568.903	499.212	474.019	226.771	314.093	315.484	383.528	361.937	276.988	226.661
Btf3l4	232.36	0	0	286.929	144.431	131.518	161.39	162.209	221.445	317.36	226.962	164.401	331.679	159.698	283.905	173.155	99.4934	190.125	213.204	188.931	188.86	347.093	254.874	292.833	172.766	351.344	89.0289	153.994	110.843	40.7946	213.472	160.161	122.677	151.561	239.935	204.469	314.038	223.387	201.767	184.932	151.142	158.088	113.515	139.638	70.6282	71.4778	89.2001	232.372	180.481
Btk	29.1843	20.4906	194.753	0	285.22	216.196	213.578	273.205	88.4513	167.872	203.083	176.722	330.792	178.982	141.766	269.348	144.147	201.677	182.453	287.912	220.239	297.018	196.543	207.049	195.07	204.641	259.732	196.769	372.933	399.019	275.608	301.633	195.946	234.428	234.382	182.72	222.039	331.994	221.1	104.053	170.274	204.121	181.544	310.321	284.536	190.115	235.382	173.578	58.9693
Btrc	0	0	0	0	0	0	0	0	0	0	0	0	0	0	0	0	0	0	0	0	0	0	0	0	0	0	0	0	0	0	0	0	0	41.8603	0	0	0	0	0	0	0	0	39.7459	132.139	0	0	0	0	0
Bub1	0	0	0	0	0	0	0	0	0	0	0	0	0	0	0	0	0	0	0	0	31.5073	146.529	0	0	85.0286	0	60.7301	69.0572	0	0	0	0	0	0	0	0	0	0	180.053	0	14.6714	0	0	0	22.052	0	42.2473	53.8927	0
Bub1b	0	0	0	0	0	0	0	0	0	0	0	54.3889	17.8936	0	0	0	0	0	97.5054	0	96.1024	0	51.4233	65.3441	266.11	138.215	258.936	291.029	233.204	249.79	134.122	142.498	83.6702	88.0539	31.9863	15.2406	54.4297	102.612	0	0	133.313	83.5967	102.207	421.644	244.985	100.359	89.0993	89.7977	0
Bub3	305.133	212.806	152.725	226.148	324.856	240.88	359.827	237.532	217.239	224.57	316.045	298.872	431.853	319.352	155.583	139.344	326.092	296.1	198.276	213.803	191.712	143.918	305.119	294.303	332.808	406.412	352.423	291.157	380.451	368.265	373.387	271.698	228.583	345.415	388.401	317.938	301.444	395.109	423.677	280.231	456.059	420.611	180.502	294.05	270.954	370.644	221.892	389.117	373.473
Bud13	0	0	0	0	0	0	0	0	0	0	0	34.6618	0	0	0	78.2266	0	0	55.698	0	52.9382	151.026	0	0	0	260.84	0	0	0	0	26.9484	101.193	0	0	0	0	0	0	0	0	0	0	46.1648	0	139.205	25.0439	71.8797	0	0
Bud23	0	0	0	0	0	0	0	0	0	0	25.3428	17.6918	7.02552	0	0	36.3083	2.40932	8.80434	0	0	0	0	17.6248	9.77142	10.5428	40.1056	38.9	12.8272	0	0	19.6774	21.5486	12.7889	19.4919	25.3425	23.6854	0	0	48.9355	47.9559	25.7634	23.8414	36.2065	119.425	131.467	79.3335	134.65	132.444	25.6022
Bud31	0	0	0	0	38.2941	29.3986	37.0884	0	60.387	63.5441	87.3984	67.2712	0	0	57.8189	56.2517	112.594	115.581	171.818	136.189	24.9072	48.1496	96.349	125.236	147.92	66.0421	71.7918	70.4455	70.9068	118.446	79.8361	28.777	27.5579	130.134	105.623	90.3893	174.037	178.985	36.5681	23.2445	76.8566	84.5532	112.304	85.5438	65.4709	159.593	11.307	68.0681	0
Bysl	0	0	0	0	0	0	18.785	33.48	36.7344	56.193	16.0194	42.7099	6.31977	20.3253	39.0451	57.0172	14.6637	54.0278	119.1	61.8334	13.4138	93.4413	18.0518	52.8443	142.848	48.735	14.9336	47.9935	0	0	120.721	37.446	27.0123	85.4099	52.902	50.9392	117.695	115.454	30.6544	0	126.595	177.18	150.401	91.7894	41.1293	70.6124	87.1601	78.8283	0
Bzw1	0	331.344	174.984	93.5947	79.9817	73.6374	134.047	151.957	73.1855	127.45	86.6508	77.425	36.0995	83.6938	90.0332	54.5206	95.7474	145.043	206.633	235.466	222.841	242.599	77.5597	80.9046	183.178	201.387	185.318	268.161	178.531	203.334	112.157	90.7741	101.983	215.111	109.648	109.42	166.627	215.565	140.132	552.679	174.824	250.3	211.185	198.797	153.361	226.032	143.665	59.9554	0
Bzw2	0	0	0	0	53.5646	87.6989	79.897	150.975	258.933	178.364	211.842	142.142	143.363	175.487	121.687	127.118	119.76	74.6666	0	276.828	82.8348	195.957	150.509	161.498	254.298	256.073	223.401	254.657	235.248	270.341	196.943	77.5442	167.918	171.729	154.94	137.332	543.122	381.003	221.8	142.703	170.747	201.395	136.11	112.023	160.16	100.603	194.616	167.119	31.2677
C130026I21Rik	606.054	0	0	0	0	0	0	0	0	0	0	0	0	0	0	0	0	0	0	0	0	0	0	0	0	0	0	0	0	0	0	0	0	0	0	0	0	0	0	0	0	0	0	0	0	0	0	0	0
C1d	0	0	0	0	0	0	0	0	0	0	0	0	0	0	0	0	0	0	0	0	0	0	0	0	0	0	0	0	0	0	0	0	0	0	0	0	0	0	0	0	0	0	0	0	0	0	0	0	0
C1galt1	0	0	0	0	0	0	0	0	0	0	0	0	0	0	0	0	0	0	0	0	0	0	0	0	0	0	0	0	0	0	22.9105	0	0	0	0	0	0	0	0	0	0	0	0	0	0	0	0	0	0
C1qbp	759.106	300.548	320.057	366.587	437.323	412.139	183.454	281.161	221.838	331.105	497.233	474.509	408.17	480.816	289.94	240.659	295.795	364.73	315.92	323.118	330.814	514.612	431.132	417.764	576.39	2190.21	398.842	404.994	247.749	269.36	295.778	422.382	607.548	424.138	472.242	681.629	362.94	552.511	692.969	715.459	479.257	629.8	490.015	579.264	513.699	618.733	442.499	524.967	548.822
C1qtnf3	29.6151	0	0	0	0	0	0	0	0	0	0	0	0	0	22.1397	6.56633	0	0	0	0	0	0	0	0	0	0	0	0	0	0	0	0	0	0	0	0	0	0	0	0	0	0	0	0	0	0	0	0	0
C1rl	0	0	0	0	0	0	0	0	0	0	0	0	0	0	0	0	0	0	0	0	0	0	0	0	0	0	0	0	0	0	0	0	0	0	0	0	0	0	0	0	0	0	0	0	0	0	49.9061	0	0
C2cd5	0	0	0	0	0	0	0	0	0	0	14.7216	28.7241	64.0602	0	67.7324	40.4462	42.6145	50.6207	86.7403	0	74.7852	87.4526	31.9829	20.0779	0	0	0	0	0	0	45.8698	76.0748	29.1573	35.0837	31.0741	16.3309	0	0	0	0	0	0	0	76.2711	62.8326	60.9803	0	49.6713	0
C3	131.396	589.656	174.689	135.928	291.864	177.195	73.7495	158.031	116.877	112.312	62.7473	93.5142	28.9074	12.3602	0	0	73.916	63.5978	0	0	0	0	24.7589	66.9919	109.915	79.1139	164.949	51.706	357.056	262.009	0	0	0	0	0	0	128.942	298.629	288.865	290.685	0	0	91.5564	159.925	216.284	95.8473	220.384	135.113	70.4276
C330027C09Rik	0	0	0	0	0	0	0	0	0	0	0	0	0	0	0	0	0	0	0	0	49.9182	81.9773	0	0	0	31.5004	0	0	0	0	80.6437	65.4474	54.3522	85.8519	0	0	0	0	0	0	0	0	52.2015	49.5547	60.0349	32.2168	81.5483	37.5046	0
C4a	0	465.103	0	0	0	0	0	0	0	0	0	0	0	0	0	0	0	0	0	0	0	0	0	0	0	0	0	0	0	0	0	0	0	0	0	0	0	0	0	0	0	0	0	0	0	0	0	0	0
C4b	115.66	0	240.94	87.8957	247.867	267.818	151.577	123.069	83.7749	0	30.6975	51.3716	14.4311	42.2891	0	0	33.8225	43.0637	0	86.4895	0	0	42.4763	30.0982	0	0	99.0688	59.7557	99.433	89.1183	0	0	0	0	0	0	32.219	78.4991	0	0	0	0	0	0	0	0	0	0	140.702
C5ar2	0	0	0	0	0	0	0	0	0	0	0	0	0	0	0	0	0	0	0	0	0	0	0	0	0	0	0	0	0	0	13.0808	0	0	0	0	0	0	0	0	0	0	0	0	0	0	0	0	0	0
C9	0	0	0	0	0	0	0	0	0	0	0	0	0	0	0	0	0	0	0	0	0	0	0	0	0	0	0	0	0	0	0	0	0	0	0	0	0	0	0	0	0	0	0	0	0	0	0	0	0
Ca3	188.623	0	0	0	0	56.1379	28.1373	56.5781	93.6737	69.9827	85.5824	77.8699	16.4194	91.7331	36.9771	35.2633	112.978	165.344	0	0	70.6038	0	0	0	0	0	0	0	0	0	0	0	0	0	9.79241	6.475	0	0	0	0	0	0	0	0	0	0	0	73.7612	0
Caap1	305.018	0	0	0	0	0	0	0	0	0	0	0	36.5867	42.9022	54.9893	50.2443	0	0	0	0	24.2765	0	0	9.78621	0	0	0	0	0	0	48.6709	0	15.6324	30.3255	11.3076	8.65131	0	34.1162	0	0	0	30.9885	32.2201	0	21.4468	26.4795	0	11.3258	19.1669
Cab39	4.76132	222.595	27.1011	0	167.327	183.428	57.7921	210.718	144.285	173.738	75.782	94.6712	81.1389	63.0544	120.793	131.261	107.357	58.1767	69.762	189.198	144.496	131.738	60.9227	51.9354	60.5611	98.109	161.534	123.406	146.85	76.5782	175.056	77.979	178.543	92.9707	22.8617	29.811	167.585	128.878	155.22	141.151	88.3918	42.5667	109.169	112.743	77.3509	86.5136	170.846	34.856	0
Cab39l	0	0	0	0	38.8174	0	0	0	0	0	0	0	11.9752	0	0	0	0	0	52.3944	0	0	0	0	0	0	0	0	0	0	0	6.33363	0	0	0	0	0	0	0	0	0	0	0	0	0	0	0	0	0	18.4193
Cabin1	0	0	0	0	0	0	0	0	0	0	0	0	0	0	0	105.754	28.5856	0	0	0	69.582	101.34	0	0	0	0	0	0	0	0	60.1231	0	0	0	101.124	115.198	0	0	0	0	113.311	80.0836	0	0	0	0	60.5743	78.8928	0
Cables1	0	0	0	0	0	0	0	0	0	0	0	0	0	0	0	0	0	0	0	0	0	0	0	0	0	0	0	0	0	0	0	0	0	0	0	0	0	0	0	0	0	0	0	0	0	0	0	0	0
Cacna1b	0	0	0	0	0	0	0	0	0	0	0	0	0	0	0	0	0	0	0	0	0	0	0	0	0	0	422.751	0	222.089	0	0	0	0	0	0	0	0	0	0	0	0	0	0	0	0	0	0	0	0
Cacna1d	0	0	0	0	0	0	0	0	0	0	0	0	0	0	0	0	0	0	0	0	0	0	0	0	0	0	0	0	0	0	0	0	0	0	0	0	0	0	0	0	0	0	0	0	0	41.3237	0	0	0
Cacna2d2	0	0	0	0	0	0	0	0	0	0	0	0	0	0	0	0	0	0	0	0	0	0	0	91.6528	0	0	0	0	0	0	0	0	0	0	141.99	204.11	0	0	0	0	0	0	0	0	0	0	0	0	0
Cacnb2	0	0	0	0	0	0	0	0	0	0	0	0	0	0	0	0	0	0	0	0	0	0	0	0	0	0	0	0	0	0	0	0	0	0	0	0	0	0	0	0	0	0	0	0	0	0	0	0	0
Cactin	0	0	0	0	35.9355	44.4751	0	0	0	86.3494	49.4139	60.1978	26.4083	0	80.817	116.844	45.4962	35.4126	32.5522	65.2773	85.3526	222.962	53.6428	75.1321	0	717.816	13.9429	22.4771	61.3363	45.8793	111.713	44.5601	141.732	48.3688	112.503	11.9845	0	0	0	0	42.953	47.3994	0	54.0251	144.252	80.0056	182.744	57.8104	69.9639
Cacul1	0	0	0	0	0	0	0	0	0	0	18.1789	0	32.6367	0	16.5323	0	0	5.85825	1.14108	0	0	0	0	43.3533	0	0	0	47.6684	0	0	54.3628	63.6775	0	65.2089	0	35.0058	0	0	0	0	31.8083	19.9736	43.0478	0	40.8298	37.9195	60.1411	57.1564	0
Cacybp	58.6388	189.278	127.779	391.288	318.446	259.379	109.478	233.305	228.421	123.861	208.219	230.975	242.909	321.649	191.055	227.913	208.89	265.401	233.453	172.074	127.853	113.991	237.94	288.169	486.453	518.523	245.884	195.877	295.437	305.477	220.571	308.892	255.095	249.998	320.013	241.012	436.328	464.544	542.835	371.076	352.788	438.096	409.189	250.842	223.524	273.203	166.016	275.966	90.1095
Cad	103.039	969.426	767.634	215.942	631.28	748.276	990.819	1127.28	751.014	770.354	832.379	802.804	869.559	809.409	626.818	711.504	643.615	814.545	1516.53	774.948	503.179	457.79	827.224	817.986	1070.14	1246.92	1310.05	1254.42	1202.44	1363.68	1059.29	1402.67	1112.11	1326.01	929.519	951.844	1895.11	1864.16	1891.26	1905.37	1273.04	1225.86	1073.89	1202.48	892.166	1240.15	994.434	889.675	451.238
Cadps2	0	0	0	0	0	0	0	0	0	0	0	0	0	0	0	0	0	0	0	0	0	0	0	0	0	0	0	0	0	0	0	0	0	0	0	0	0	0	0	0	0	0	0	0	0	0	0	0	0
Calcoco1	0	0	0	0	74.4914	66.9107	0	0	46.5663	26.6291	0	0	0	0	82.3419	126.815	49.4825	46.0023	0	71.377	171.266	180.264	0	22.8219	0	0	0	0	0	27.1566	35.5046	0	0	0	0	0	0	0	0	0	0	0	0	0	0	0	0	0	24.748
Calcrl	22.0342	85.8962	53.4432	0	39.3032	31.9212	81.2494	98.1006	37.1427	50.5693	12.6599	43.6354	60.0695	76.9717	124.182	68.5029	92.5887	98.3987	61.3616	98.6454	53.7689	51.3956	134.14	101.642	108.333	63.5576	23.2674	24.6969	27.0869	27.2942	79.96	21.3456	60.1143	25.4723	25.3067	71.1073	0	0	0	0	0	0	0	0	20.5756	28.163	0	28.4366	27.1867
Calhm2	0	0	0	0	0	0	0	0	0	0	0	0	0	0	0	0	0	0	0	0	0	0	15.1613	0	0	0	0	0	0	0	0	0	0	0	0	21.5022	0	0	0	0	0	0	0	0	0	0	0	0	0
Calm1	5538.5	1575.56	905.071	2101.69	1267.95	1291.39	1446.44	1387.37	1399.88	1606.44	841.006	895.101	2762.43	2420.12	1062.73	1136.2	547.487	341.144	1356.2	1401.72	1012.65	1687.46	649.958	762.721	1800.88	1473.79	527.041	580.958	307.521	469.805	687.254	1565.37	868.818	1229.58	585.208	508.047	1260.97	1433.45	1039.66	960.324	388.03	449.221	1017.67	838.709	995.188	929.43	617.954	404.613	1362.56
Calr	1086.14	902.723	759.029	1200	1163.27	1270.18	1188.1	932.411	1026.3	840.745	1790.42	1714.8	1178.99	900.976	1176.74	1067.17	1223.59	1369.11	682.683	914.573	1398.12	943.121	1417.9	1541.19	792.152	689.284	1448.46	1587.07	728.602	940.688	1520.38	551.273	1884.98	921.556	3878.31	3566.81	738.662	469.025	1158.67	1772.04	1650.75	1486.19	2380.85	2937.47	2972.13	5178.76	3607.27	5850.09	1338.44
Calu	734.065	404.232	309.78	424.237	615.34	511.675	411.46	477.215	407.223	514.651	456.648	610.627	364.857	434.637	474.954	409.201	300.97	482.466	337.066	432.003	536.759	490.916	561.19	475.295	622.288	551.477	355.39	289.21	155.173	82.6204	360.708	385.653	365.641	367.894	625.447	473.507	534.081	405.393	550.783	425.28	538.637	472.581	316.209	314.18	290.483	353.819	463.25	393.924	496.024
Camk1	0	0	0	0	40.4017	43.6	0	0	0	68.3416	80.2689	36.7388	72.4786	0	84.6185	74.0849	53.1326	73.1581	7.15536	38.6992	99.3292	61.5182	12.1121	0	0	0	0	0	0	0	0	0	14.6633	47.7233	27.7582	0	0	0	0	0	0	0	0	0	0	0	7.80669	0	0
Camk1d	0	0	0	0	0	0	0	56.535	0	0	0	0	0	0	103.756	42.3164	0	46.8323	140.903	60.6922	181.144	108.715	106.876	101.573	285.543	239.669	220.145	200.951	187.388	302.071	45.2589	27.0272	32.9261	82.09	0	38.9859	0	0	0	0	0	50.0272	0	0	0	0	0	0	0
Camk2a	0	0	0	0	0	0	0	0	0	0	0	0	11.5207	0	42.7356	33.1895	0	17.9784	0	6.02382	38.49	0	7.55821	36.2593	0	0	0	0	0	0	24.3563	0	9.25869	0	0	0	0	0	0	0	0	0	0	0	84.0748	0	28.8752	0	0
Camk2d	205.296	561.203	479.906	254.42	369.33	312.014	263.525	307.68	204.303	247.101	171.312	177.276	140.546	143.215	123.571	134.644	180.717	148.842	126.53	233.191	291.662	149.24	141.385	219.524	172.729	202.438	257.226	165.523	141.453	214.421	65.1207	98.6073	172.481	101.534	107.191	103.014	0	0	0	0	0	0	0	0	78.0683	46.9167	83.8518	36.6393	384.297
Camk2g	144.655	153.299	92.6502	0	51.9877	74.8453	87.0652	88.8319	112.354	79.0992	73.378	97.5367	235.198	88.5528	184.905	159.366	117.456	115.211	114.684	141.27	225.993	135.8	239.645	127.787	113.972	129.39	60.2109	53.5998	21.2905	40.4932	117.084	111.806	148.416	78.3745	76.0119	40.2397	23.342	42.7746	0	0	61.8186	75.1163	125.076	87.3762	93.2829	120.356	127.583	130.869	140.332
Camkk1	0	0	0	0	0	0	0	0	0	0	0	0	0	0	0	0	0	0	0	0	0	18.0811	0	0	0	0	0	0	0	0	0	0	0	0	0	0	0	0	0	0	0	0	0	0	0	0	0	0	0
Camkk2	0	0	0	0	0	0	0	0	0	0	0	0	17.5211	0	0	89.5736	0	11.2993	79.935	0	0	0	0	12.3506	0	0	0	0	0	0	24.2631	55.4435	48.7858	27.7269	0	0	0	0	0	0	0	0	0	19.5023	66.2936	47.0263	97.4981	32.3578	0
Camkmt	0	0	0	0	0	0	0	0	0	0	0	5.67806	0	0	0	0	0	0	0	0	0	0	11.3668	11.1729	0	0	0	0	0	0	0	0	0	0	0	0	0	0	0	0	0	0	0	0	0	0	0	18.6768	0
Camkv	0	0	0	0	0	0	0	0	0	0	0	0	0	0	0	0	0	0	0	0	0	0	0	0	0	0	2.74664	5.80155	7.1322	0	0	0	0	0	0	0	0	0	0	0	0	0	0	0	0	0	0	0	0
Camlg	0	0	0	0	0	0	0	0	0	0	0	0	43.9819	23.4118	18.3937	0	102.229	0	49.1586	0	0	0	0	85.1631	0	0	0	0	0	0	0	22.8357	60.8423	19.946	0	0	7.84848	0	0	0	9.94194	10.7521	28.8882	45.5023	46.0382	47.714	67.5576	8.78239	110.321
Camsap1	0	0	0	0	0	0	0	0	0	0	0	0	0	0	0	0	0	0	0	0	0	0	0	0	0	0	0	0	0	0	0	0	0	0	0	0	0	0	0	0	0	0	0	0	0	0	82.1415	0	0
Camsap3	0	0	0	0	0	0	0	0	30.2195	48.8747	47.257	7.3657	1.84697	0	38.1557	53.7274	49.003	3.64754	0	47.3152	10.0389	0	3.24157	0	0	0	0	0	0	0	0	0	0	0	0	0	0	0	0	0	0	0	0	0	0	0	0	0	0
Cand1	631.77	1369.15	1163.18	856.824	1241.11	1115.18	1338.47	1298.01	1022.45	951.337	994.823	860.755	809.363	1027.94	1026.07	879.982	879.666	906.342	1317.36	1375.82	752.669	859.724	841.078	883.129	811.493	857.04	1026.5	839.183	1045.12	1010.88	930.514	1024.19	784.992	1074.08	749.674	583.445	839.866	955.255	733.956	846.42	801.756	578.473	1027.84	675.433	719.053	809.374	705.169	711.252	917.378
Cand2	0	523.786	407.265	0	170.862	63.4757	117.039	213.573	190.872	215.214	182.291	174.271	173.657	61.3969	175.524	107.777	135.58	228.804	210.887	213.013	150.242	291.671	247.781	136.059	691.297	1506.81	122.457	135.22	317.69	269.543	136.634	117.488	221.969	205.1	139.294	167.361	0	0	0	0	0	0	0	101.446	119.332	85.8398	168.531	50.2508	24.5749
Cant1	0	0	0	0	0	0	0	0	0	0	0	0	0	0	0	0	0	0	0	0	0	0	0	0	0	0	0	0	0	0	0	0	11.7685	0	0	0	0	0	0	0	0	0	0	0	0	0	0	9.15262	0
Canx	1276.17	600.81	892.241	1071.54	621.009	825.042	538.122	553.712	663.263	478.24	752.008	856.1	1021.36	594.804	642.693	658.657	567.721	552.876	552.953	513.649	668.341	764.748	677.368	584.136	770.941	986.367	706.981	722.331	395.812	367.453	677.009	719.367	527.413	662.272	827.299	761.095	908.393	925.411	545.049	655.52	1075.63	828.999	1045.33	824.222	763.379	1009.76	948.676	1110.48	494.015
Cap1	514.135	966.825	707.84	317.373	558.574	504.185	742.666	814.563	646.728	469.259	693.995	729.367	766.257	1055.52	783.415	725.486	885.848	938.137	774.128	817.381	1596.18	2070.64	972.869	987.177	972.042	697.375	787.504	808.169	770.831	729.334	797.797	784.713	590.349	954.713	774.808	741.049	544.847	368.286	508.19	444.723	422.322	493.842	750.523	604.242	592.601	578.032	498.745	646.536	1118.77
Capg	1521.71	1055.25	978.379	1057.67	647.81	843.251	995.147	661.5	439.505	391.653	914.017	797.642	1194.26	948.732	606.702	551.25	723.1	705.907	498.731	368.411	718.656	550.69	489.489	740.762	471.279	573.005	350.885	349.247	236.801	242.642	525.032	334.058	219.014	435.363	294.684	293.231	369.117	632.89	311.287	274.907	262.308	269.427	149.404	259.808	177.491	154.886	202.604	146.765	1230.62
Capn1	17.0734	102.481	245.683	0	64.68	176.452	192.854	244.091	171.439	170.487	176.563	232.444	187.689	225.801	225.424	217.214	479.004	418.076	322.399	115.164	108.36	354.555	333.708	434.34	109.346	98.6283	189.057	106.623	249.244	191.798	236.208	252.844	210.836	327.183	220.464	321.747	178.009	295.17	314.082	305.86	189.368	319.676	317.386	268.938	398.3	255.679	396.283	244.598	402.934
Capn2	0	0	0	0	74.5114	161.753	0	0	0	0	26.8362	144.917	32.68	12.6615	99.9121	207.575	33.7267	84.3129	95.3906	0	130.146	144.458	103.352	92.2011	0	0	53.0114	0	0	0	24.6599	66.4729	48.2	72.8695	0	0	0	0	0	0	0	0	0	0	0	0	0	12.8333	17.0382
Capn5	0	0	0	0	0	10.3695	0	0	0	0	0	0	10.7263	0	93.6983	29.499	9.9352	22.623	0	0	64.7129	0	10.0505	0	0	0	0	0	0	0	0	0	0	0	0	0	0	0	0	0	0	0	0	0	0	0	0	0	0
Capn7	0	0	0	0	0	0	0	0	0	0	0	0	0	0	0	0	6.5405	0	0	0	77.9536	0	0	0	0	0	38.7124	19.4325	0	0	0	0	0	0	0	0	0	0	0	0	0	21.2817	0	0	35.524	0	84.5501	21.1259	0
Capns1	44.852	175.581	86.2671	376.629	75.2106	98.0453	179.845	112.396	114.096	131.542	117.757	139.278	66.4202	18.3123	84.4647	112.1	133.745	148.507	101.369	192.489	132.387	192.489	126.434	190.576	124.334	102.553	114.868	92.3878	75.5941	73.5707	88.0349	69.7332	48.2644	101.719	122.608	70.8527	151.065	77.5086	0	0	122.596	110.039	108.077	29.4582	49.0929	89.261	76.566	92.7581	71.2684
Caprin1	215.794	294.806	351.187	348.527	276.727	232.023	522.12	414.288	746.848	723.055	545.289	507.272	318.799	424.375	445.342	471.053	375.599	453.429	452.381	326.238	678.884	306.452	512.702	607.019	807.465	928.863	480.986	560.361	574.669	462.911	565.873	571.684	747.787	544.691	715.729	754.269	1003.92	856.116	967.808	796.486	993.938	783.738	698.997	464.593	578.598	743.513	580.061	652.835	397.522
Capza1	1495.48	1346.24	1042.44	1777.63	939.618	675.352	805.389	989.167	1125.63	1004.04	883.491	982.672	1369.24	938.709	965.749	1032.36	863.091	1116.15	904.052	805.752	768.25	1015.65	944.38	1025.75	1173.67	851.575	1032.77	1015.91	839.077	889.856	994.4	833.512	799.617	831.425	1021.42	1159.83	924.668	858.942	1702.84	1035.48	885.772	891.983	889.125	907.499	1095.02	1040.65	1200.11	1121	987.913
Capza2	980.953	752.825	1046.65	922.213	819.488	1181.21	975.816	467.36	814.084	606.154	692.999	693.89	1038.66	1298.66	507.537	612.65	543.441	695.346	395.107	694.313	466.253	666.599	613.713	632.502	803.861	1500.15	627.337	700.322	475.05	738.975	703.781	465.756	1450.62	435.207	597.411	636.334	515.215	353.748	591.697	505.483	370.661	486.491	417.703	525.331	441.917	590.439	725.425	575.579	592.933
Capzb	621.393	986.834	594.036	1022.16	618.336	673.366	581.663	891.322	781.887	846.657	616.9	598.1	799.578	948.506	647.761	557.903	750.27	714.381	658.997	656.992	610.975	926.909	737.71	835.302	627.422	501.389	1062.58	879.943	420.047	459.042	990.436	665.272	215.129	736.32	866.59	827.931	726.232	504.251	461.809	190.29	540.78	554.569	805.656	482.741	419.055	545.63	1070.48	632.313	553.987
Car13	0	0	0	0	0	0	0	0	27.0979	21.3648	0	0	0	0	55.4256	40.3026	11.2683	3.26112	0	0	0	0	0	0	0	0	0	0	0	0	36.0676	31.1437	0	34.3408	0	0	0	0	0	0	0	0	0	0	0	0	0	0	0
Car2	8439.2	5720.13	5320.21	7517.61	7631.02	8084.64	2927.37	2883.65	4050.4	3431.65	5476.08	5692.82	3266.1	3073.86	3065.88	3365.9	4983.96	6103.62	1825.7	2692.3	1368.48	1584.99	5173.25	4746.64	464.619	994.939	607.783	563.329	935.654	834.084	1873.52	1863.38	2512.47	1590.69	1580.48	2016.7	6891.8	6247.49	7113.36	7372.37	8710.85	8192.86	230.013	349.87	313.829	328.962	284.479	252.81	5242.51
Car8	0	0	0	0	0	0	0	0	0	0	0	0	0	0	0	0	0	0	0	0	0	0	0	0	0	0	0	0	22.0293	0	0	0	0	0	0	0	0	0	0	0	0	0	0	0	0	0	0	0	0
Card19	0	0	0	0	15.1723	0	0	0	0	0	1.64271	11.4997	0	0	76.5434	33.6009	4.06725	26.6149	28.1741	0	0	0	0	8.28143	0	0	0	0	0	0	0	0	0	0	0	0	0	0	0	0	0	0	0	0	0	0	0	0	0
Card9	0	0	0	0	0	0	0	0	0	0	0	0	0	0	0	0	0	0	0	0	0	0	0	0	0	0	0	0	0	0	93.1155	0	236.663	0	88.3043	8.1146	0	0	0	0	0	0	538.073	209.761	211.115	335.3	368.077	267.991	0
Carhsp1	19.5039	68.6403	64.9704	54.7104	99.1121	197.017	55.8391	38.6691	82.8976	59.8913	59.3048	72.9034	6.96548	0	41.8964	17.3188	57.9115	49.5901	0	52.3249	9.0107	40.2444	29.6453	40.7457	26.5925	0	93.3558	103.961	95.8723	120.692	18.4816	0	30.8271	0	0	5.41573	0	0	0	0	36.0427	68.5663	0	0	0	0	0	5.3013	0
Carm1	0	0	0	0	30.7422	53.7709	44.6522	37.8204	31.1328	50.772	62.6385	63.1975	121.732	16.719	11.9466	22.3319	53.367	40.9817	17.3494	73.9254	84.6306	28.0459	54.8738	53.4004	0	0	67.4446	55.6625	56.9395	96.0303	54.3723	33.3853	32.4677	43.1924	42.6144	54.466	37.9452	12.1682	114.538	83.5946	126.701	74.8968	30.8179	52.6701	57.7045	80.1311	64.1562	53.7039	0
Carmil2	0	0	0	0	0	0	0	0	0	0	10.8863	27.9174	17.5777	0	0	0	45.9367	8.36968	48.3625	83.8933	49.0144	146.925	32.7711	44.2522	95.1848	123.848	73.3809	88.3567	86.3646	70.715	47.9591	60.7857	70.7079	81.4426	0	0	0	0	0	0	0	0	0	0	0	0	0	0	0
Carnmt1	0	0	0	0	4.68931	6.10867	0	0	0	0	20.3239	46.0764	16.0201	0	46.667	38.2268	31.5852	17.8644	0	15.1875	0	0	12.5788	30.0775	0	0	58.4067	14.5695	119.506	76.1394	88.2272	24.119	0	65.1628	0	3.16002	25.4943	25.6433	0	0	84.7137	31.4761	0	0	36.5315	11.6847	0	14.0675	0
Cars	197.921	134.012	253.654	0	289.735	254.445	70.2095	114.942	247.524	141.078	175.48	188.546	222.756	233.491	217.507	360.901	239.086	269.744	398.771	206.619	257.134	303.516	177.011	204.723	237.585	214.083	236.815	239.385	263.231	222.271	198.357	314.878	278.817	314.55	207.882	145.834	384.639	328.313	245.736	341.051	289.896	297.34	312.455	271.149	216.534	308.658	415.565	267.802	54.2802
Cars2	0	0	0	0	0	0	0	0	0	0	0	3.0385	51.7937	0	0	0	0	0	0	0	97.3839	40.0677	0	0	0	0	0	47.9854	0	0	47.9329	0	0	0	0	0	0	0	0	0	48.967	0	0	0	0	0	0	14.0902	0
Casc1	0	0	0	0	0	0	0	0	0	0	0	0	0	0	0	0	0	0	0	0	0	0	0	0	0	0	0	0	0	0	0	0	43.4931	0	0	0	0	0	0	0	0	0	0	0	0	0	0	0	0
Casc3	0	0	0	0	0	0	0	0	0	0	0	12.9982	35.8027	0	0	20.2423	1.3515	0	0	0	0	0	0	0	0	0	0	0	0	0	32.067	8.98826	0	0	0	0	0	0	0	0	0	0	0	0	44.3704	0	0	0	0
Casc4	29.7588	0	0	0	0	0	0	0	0	0	0	0	0	0	0	0	0	0	0	0	0	0	0	0	0	0	0	0	0	0	0	0	0	0	0	0	0	0	0	0	0	0	0	0	0	0	0	0	0
Casc5	0	0	0	0	0	0	0	0	0	0	0	0	0	0	0	0	0	0	0	0	0	0	0	0	0	0	0	0	0	0	92.2456	0	0	0	0	0	302.19	379.877	0	0	92.6159	146.572	59.9974	0	72.7258	0	125.02	38.6945	0
Caskin2	0	0	0	0	0	0	0	0	12.5099	0	0	0	0	0	0	0	38.5735	0	0	0	62.7132	77.8384	13.3982	40.9754	0	0	0	0	0	0	0	0	0	0	0	0	0	0	0	0	0	0	0	0	0	0	0	0	0
Casp1	274.644	78.1456	267.079	164.229	182.048	110.873	52.8929	204.691	120.328	207.45	119.823	129.273	179.073	151.361	125.421	201.681	192.444	144.904	193.107	174.622	0	46.3107	150.526	158.816	110.252	164.233	123.821	98.55	164.947	99.0201	126.172	132.495	93.6323	180.29	39.0551	51.3528	0	0	0	0	0	17.6675	250.375	153.966	167.232	220.83	135.514	159.188	127.988
Casp12	0	0	0	0	0	0	0	0	0	0	74.0166	0	0	0	0	0	0	0	0	0	0	0	0	0	0	0	0	0	0	0	0	0	0	0	0	0	0	0	0	0	0	0	0	0	0	0	0	0	0
Casp2	29.1605	0	0	0	124.865	97.332	125.649	110.733	244.815	314.826	190.158	160.79	125.127	21.1976	250.124	280.873	164.13	162.451	171.295	256.641	421.273	361.861	226.29	201.472	0	0	72.0494	97.4636	142.511	181.961	176.432	111.794	265.149	177.007	86.9765	75.3281	0	0	0	0	76.7226	60.6659	114.216	66.688	54.296	107.494	160.982	113.556	45.6536
Casp3	121.646	233.254	247.085	311.788	218.552	189.953	302.876	192.532	94.201	261.982	176.224	216.432	162.345	124.332	128.8	132.574	156.073	139.574	149.491	211.13	68.4447	75.4833	88.312	111.776	222.715	226.836	267.496	230.735	234.92	246.334	300.709	400.331	294.002	334.55	96.2169	122.858	608.808	749.741	776.654	798.843	547.521	543.423	152.912	122.426	122.242	162.541	171.945	103.735	108.592
Casp6	26.6829	137.151	89.2721	0	66.565	60.7837	62.6994	45.3553	94.6439	29.286	44.8397	37.2475	106.857	89.9775	151.147	124.937	78.1141	68.962	197.721	50.6867	110.701	194.493	77.4705	38.9201	0	0	59.5642	74.398	25.0316	91.8185	74.0301	74.7025	56.7189	112.766	37.3047	0	0	0	45.1058	32.4975	51.0437	63.3835	0	0	42.3222	0	18.0738	21.1032	107.314
Casp7	105.345	0	0	214.675	96.5458	46.5642	169.7	0	347.278	79.8235	70.2571	84.284	105.977	92.3122	75.3506	81.3632	63.6817	66.0789	99.4435	59.8167	61.4766	75.3721	62.1869	59.3303	103.243	0	94.614	144.758	66.4797	86.1622	70.0137	42.0268	28.6077	96.1158	77.7278	43.4683	0	0	0	0	77.8662	80.3117	98.7715	145.274	112.28	64.1701	84.3631	54.3203	63.5963
Casp8	365.209	457.207	284.183	0	189.736	364.03	280.788	608.505	384.312	437.78	359.045	331.694	472.239	366.127	355.146	321.712	379.88	336.128	520.655	432.463	371.399	402.206	364.039	324.676	401.047	391.271	390.764	449.672	391.256	368.462	309.563	400.442	310.361	336.012	267.368	237.9	74.5123	109.025	99.2864	80.0713	226.165	293.42	364.516	430.482	521.494	303.698	219.677	250.078	226.18
Casp8ap2	0	0	0	0	0	0	0	0	0	0	0	0	0	0	0	0	0	0	0	0	0	223.121	0	0	0	0	0	0	0	0	0	0	0	0	0	0	0	0	0	0	0	0	0	205.617	207.885	0	214.012	0	0
Casp9	0	0	0	0	0	0	0	0	0	0	0	0	0	0	0	0	0	0	0	0	0	0	0	0	0	0	0	0	0	0	0	0	0	0	0	0	0	0	0	0	0	0	0	0	0	0	36.4836	0	0
Casq1	0	0	0	0	0	0	161.181	101.634	0	0	39.048	21.1574	12.0876	19.5572	0	57.7787	0	29.4977	0	80.2258	0	0	32.5246	0	0	0	44.8731	35.3648	0	0	0	0	0	0	0	0	0	0	0	0	0	0	0	0	0	0	0	0	0
Cass4	0	0	0	0	0	0	0	0	0	0	0	0	0	0	0	0	0	0	0	0	0	0	0	0	30.6486	0	0	0	0	0	0	0	0	0	0	0	0	0	0	0	0	0	0	0	0	0	0	0	0
Cast	506.055	287.771	888.202	416.283	468.352	355.681	274.074	261.018	464.123	367.147	187.762	145.81	306.61	329.002	270.032	394.126	131.728	111.029	667.753	374.904	287.56	313.69	167.563	121.53	492.368	552.633	241.424	143.159	229.107	259.081	378.998	505.781	799.933	382.611	126.45	145.821	369.814	304.558	298.953	830.113	112.066	130.258	163.579	268.412	330.867	148.582	624.829	78.1762	694.268
Casz1	0	0	0	0	0	0	0	0	0	0	0	0	0	0	0	0	0	0	0	0	0	0	0	0	0	0	0	0	0	0	0	0	0	0	0	0	0	0	0	0	0	0	0	0	0	143.36	94.1763	31.3615	0
Cat	274.068	323.971	468.987	317.765	441.639	379.951	382.484	367.161	347.248	268.66	320.768	363.026	430.456	348.716	357.961	266.94	315.123	279.106	212.332	455.857	299.474	285.962	270.504	345.201	267.075	338.495	542.775	532.136	422.472	513.265	369.682	370.929	224.741	282.88	469.617	522.65	594.366	604.03	688.822	773.362	589.467	564.575	304.023	348.717	353.987	278.902	396.063	402.35	244.254
Catsperg1	0	0	0	0	0	0	0	0	0	0	0	0	0	0	0	0	0	0	0	0	0	0	0	0	0	0	0	0	0	0	0	0	0	0	0	0	0	0	0	0	0	0	0	129.329	0	0	0	0	0
Cavin2	0	0	53.2634	0	21.206	30.1141	0	0	0	0	0	0	0	0	0	0	0	0	0	0	0	0	0	0	0	0	0	0	0	0	0	48.207	25.6892	0	0	0	0	0	90.7578	0	0	0	0	0	0	0	0	0	135.216
Cbfa2t2	0	0	0	0	0	0	0	0	0	0	0	0	0	0	0	0	0	0	0	0	0	0	0	0	0	0	0	0	313.265	0	0	0	0	0	0	0	0	0	0	0	0	0	0	0	0	0	0	21.6028	0
Cbfa2t3	0	0	0	0	0	0	100.983	0	168.696	112.189	91.0011	125.553	65.7341	27.5165	127.626	145.887	67.0287	76.4943	55.4255	65.0979	144.842	114.511	62.3128	55.1024	0	0	0	35.8148	0	32.7993	169.22	85.1568	6.62071	91.6142	16.5701	34.7778	290.056	393.683	0	0	196.492	168.584	70.5613	38.8758	34.0031	24.9383	0	0	0
Cbfb	303.223	91.7356	142.073	290.896	199.088	134.501	141.31	163.498	215.545	154.262	144.741	189.818	192.421	392.133	199.115	162.079	91.5265	97.9963	224.081	196.853	399.513	290.084	157.633	125.67	214.519	316.119	129.213	204.167	77.6063	180.387	238.621	198.69	173.838	201.294	173.388	114.237	83.6325	120.296	60.0372	81.7602	122.499	119.258	83.9863	102.594	103.562	118.06	127.752	96.5832	125.966
Cbl	0	0	0	0	363.324	496.72	57.5384	48.7554	0	0	72.7235	171.605	91.3054	77.3126	240.383	120.626	388.471	320.884	30.6045	83.0503	0	0	247.762	311.296	49.2812	112.806	346.649	302.009	456.56	427.502	105.964	146.87	144.239	99.261	173.19	237.96	27.8205	0	0	0	124.655	131.346	200.706	194.047	148.383	183.545	522.037	249.629	0
Cblb	0	0	0	0	0	0	0	0	0	0	0	0	0	0	0	0	0	0	0	0	0	0	0	0	0	0	0	0	0	0	0	0	0	0	0	0	0	0	0	0	0	0	0	0	0	0	0	0	0
Cbll1	0	0	0	0	0	0	0	0	0	0	9.29873	0	24.9726	0	0	0	0	0	0	0	68.1402	0	0	0	0	0	21.2115	0	0	0	57.9675	56.8414	0	93.5168	0	0	0	54.9673	0	0	0	0	94.1593	0	0	0	0	20.0515	0
Cbr1	1033.1	1040.19	694.051	919.974	1038.5	978.495	375.736	420.74	660.4	579.699	609.728	634.503	449.99	550.034	403.553	341.456	616.086	562.299	237.59	504.228	386.825	319.584	502.434	491.941	418.304	292.171	523.352	504.737	440.538	475.681	202.195	149.714	286.884	265.951	396.868	292.279	271.582	248.589	356.654	337.265	428.104	420.953	67.509	153.578	118.645	187.114	147.158	198.884	852.239
Cbr3	111.445	236.67	352.084	420.702	285.019	247.27	0	127.462	194.218	89.3169	86.6026	84.5686	7.86936	0	174.974	167.565	109.344	126.886	0	14.5711	37.2141	36.5128	0	8.14643	0	0	0	0	0	0	0	0	0	0	0	0	0	0	0	0	0	0	0	0	0	0	0	0	374.642
Cbr4	0	0	0	0	0	0	51.0267	0	0	0	28.2306	12.6442	0	0	46.2368	15.2019	5.40114	0	0	0	23.9862	14.3885	7.42183	8.5932	0	0	0	0	0	0	15.6904	0	0	0	0	0	0	0	0	0	0	13.4087	0	0	0	0	0	0	0
Cbwd1	0	0	0	0	0	0	0	0	17.1032	0	0	0	0	0	20.6523	0	0	0	0	0	27.2573	14.519	0	0	0	10.8264	0	33.6508	0	8.402	39.1056	0	34.9078	10.7475	0	0	185.691	0	0	0	27.6429	58.3076	58.413	31.2055	56.8668	34.988	100.371	21.9609	0
Cbx1	783.437	439.298	405.39	517.754	412.58	367.247	439.359	397.169	547.713	525.464	417.761	363.307	208.999	95.1564	533.559	269.762	286.829	298.419	134.411	304.671	448.833	437.344	266.088	296.875	337.761	456.189	193.001	176.886	223.926	214.177	209.247	331.595	323.858	243.113	301.016	279.332	292.765	537.745	562.068	211.868	145.87	247.626	69.0085	179.224	156.996	245.935	194.22	103.752	416.404
Cbx3	2469.15	642.684	481.82	1287.14	820.784	834.309	647.667	800.074	730.363	857.857	1135.58	886.747	1416.49	841.832	622.815	900.538	900.511	769.948	937.178	747.088	1018.4	2011.59	1109.93	1055.64	871.604	934.894	1225.09	954.407	887.314	346.204	790.705	908.055	458.322	1130.04	1371.54	952.841	583.746	773.953	621.601	562.672	771.81	771.063	569.334	835.883	681.626	687.925	294.779	564.674	751.94
Cbx4	0	0	0	0	0	0	0	0	0	0	0	0	0	0	0	0	0	0	0	0	0	0	2.6571	0	0	0	21.5096	42.9215	0	0	0	43.1218	0	0	10.5108	0	0	0	0	0	0	0	0	67.9607	11.2927	39.1872	48.5624	50.2394	0
Cbx5	1135.51	0	0	192.716	399.168	304.652	119.579	115.851	69.5799	69.648	447.517	357.228	459.458	518.76	101.773	78.5043	440.169	431.975	149.064	85.3291	149.767	45.6039	494.556	458.454	219.286	226.406	492.416	405.716	300.773	406.733	127.843	213.078	79.6144	262.236	649.575	498.382	184.3	202.281	288.959	247.163	495.919	509.915	195.989	236.535	226.301	310.447	56.4196	342.226	390.163
Cbx6	0	0	0	0	0	0	0	0	0	0	0	11.5189	0	0	0	0	0	0	0	0	0	9.26513	0	0	0	0	0	0	0	0	6.90885	0	0	0	0	0	0	0	0	0	0	0	0	0	0	0	0	0	0
Cbx8	0	0	0	0	0	0	0	0	0	0	0	0	0	0	0	0	0	0	0	0	162.34	0	0	21.6754	0	0	0	0	0	0	0	0	0	0	0	0	0	0	0	0	0	0	0	0	0	0	0	7.02709	0
Cc2d1a	0	0	0	0	0	0	0	0	0	0	0	6.34719	0	0	0	37.0896	0	0	0	0	79.3989	50.0416	0	19.9889	0	0	53.7535	0	0	0	72.8254	7.52589	11.8647	0	0	0	0	0	0	0	0	0	0	0	0	0	81.1643	0	0
Cc2d1b	0	0	0	0	0	0	17.2853	115.385	61.6166	42.9847	149.96	102.667	74.2514	54.5087	188.178	134.684	126.757	99.1379	129.379	137.313	206.881	212.324	163.09	117.023	49.4428	40.9597	157.973	168.324	118.613	103.572	188.721	68.8828	94.3683	120.482	80.5435	188.616	112.139	82.1994	173.305	131.277	188.555	87.4377	33.8666	85.9804	101.529	107.264	135.772	67.7368	48.9449
Ccar1	209.348	0	250.069	186.748	447.499	381.769	231.837	706.261	283.386	345.096	339.682	271.241	250.979	258.331	343.073	201.716	357.199	445.747	293.078	425.314	259.764	291.702	462.942	362.714	217.512	374.154	389.226	302.296	406.817	522.721	275.802	194.021	190.785	305.868	520.948	363.664	197.037	318.917	231.998	234.003	415.719	396.368	328.538	232.831	143.144	212.086	288.426	351.408	395
Ccar2	119.472	375.541	758.851	222.929	674.254	649.559	675.073	571.904	564.613	627.259	645.774	650.652	358.194	521.503	593.515	629.664	605.715	748.04	593.911	585.521	529.097	672.047	772.64	763.612	388.929	340.955	410.127	461.945	824.529	759.19	527.19	538.327	607.541	400.212	727.736	910.11	457.065	371.239	185.144	551.875	615.145	748.326	316.891	403.245	411.255	455.158	496.156	425.025	962.916
Ccdc108	0	0	0	0	0	0	0	0	0	0	0	0	0	0	0	0	0	0	0	0	0	0	0	0	0	0	0	0	0	0	0	0	0	0	0	0	0	0	1154.85	0	0	0	0	0	0	0	0	0	0
Ccdc115	22.8398	0	31.4506	0	61.5015	52.6508	0	43.7388	187.118	148.572	104.262	50.8355	15.1272	69.6551	96.8337	92.4911	66.7753	88.8179	58.5897	24.7876	99.4705	98.5117	42.5476	43.1942	55.7258	67.1053	124.974	37.2305	84.5795	66.8964	57.3023	75.9456	67.8073	29.7633	55.948	42.4298	58.0075	22.9498	16.8635	60.4721	57.4561	45.4319	78.0312	52.4874	53.6216	57.0967	60.462	55.3148	85.3641
Ccdc117	0	0	0	0	0	0	0	0	0	24.1069	0	46.6601	0	18.2149	37.3621	67.4686	52.8994	0	15.2898	0	61.0909	0	56.4576	44.5578	66.0507	26.9086	48.2032	30.4394	54.0978	32.769	31.4694	46.4059	0	0	18.0671	0	23.6937	0	0	0	4.2848	4.47659	16.3429	24.8638	35.441	26.3994	0	38.3315	0
Ccdc12	0	0	0	0	54.9062	0	125.529	113.473	233.171	201.697	141.146	65.2001	23.8949	52.4124	139.375	94.9716	57.8195	54.5141	98.1044	121.446	308.335	237.432	148.472	136.907	236.359	333.616	78.2154	75.6081	0	63.4102	131.508	110.402	136.569	55.5114	160.231	145.812	351.264	124.868	117.289	178.882	108.427	119.622	17.1907	176.071	58.7078	92.9355	66.274	62.5543	0
Ccdc124	0	0	0	0	0	0	0	0	50.2638	121.878	37.7106	36.0373	17.8343	13.4855	50.1728	58.7796	46.639	47.3976	0	0	106.6	76.2838	39.3823	29.359	164.411	92.5822	43.456	55.742	93.1031	109.355	92.2474	0	67.5171	53.353	100.085	50.6402	202.177	70.598	127.329	76.9922	114.628	81.8098	0	36.0667	72.0285	56.4187	39.0035	45.5736	0
Ccdc127	0	0	0	0	0	0	0	0	0	0	32.1799	0	0	0	36.841	33.3918	0	21.2299	0	22.1955	0	0	9.54791	20.9548	0	5.77403	0	0	28.9152	9.23739	8.53724	18.6606	0	0	0	0	0	0	0	0	0	0	0	0	0	0	0	20.7104	0
Ccdc134	0	0	0	0	11.4353	0	0	0	24.7033	22.2996	0	0	47.4302	31.1237	28.6637	29.2674	14.6181	28.4371	0	0	11.651	20.256	0	7.54312	25.3296	0	25.3262	66.1587	55.9131	40.106	34.0209	58.2169	107.193	0	45.0374	0	0	0	0	0	17.3395	26.246	23.3806	39.2289	59.6677	27.8665	79.2062	28.1135	0
Ccdc137	0	0	0	0	0	0	0	0	0	0	0	0	0	0	0	0	0	19.6659	0	0	11.6433	57.7677	0	0	0	0	0	0	0	0	0	0	0	0	0	0	0	0	0	111.337	135.641	89.1636	0	0	0	0	0	0	0
Ccdc150	0	0	0	0	0	0	0	0	0	0	0	0	0	0	0	0	0	0	0	0	0	0	0	0	0	0	0	0	0	0	0	0	0	0	0	0	0	0	0	104.829	0	0	0	0	0	0	0	0	0
Ccdc158	0	0	0	0	0	0	0	0	0	0	0	0	0	0	0	0	0	0	0	0	0	0	0	0	0	0	0	0	0	0	0	0	0	0	0	0	0	0	0	0	0	0	0	0	0	0	0	61.224	0
Ccdc167	0	0	0	0	0	0	0	0	0	0	0	0	6.87487	0	0	0	0	0	0	0	0	0	0	0	0	0	0	0	8.14179	0	28.7426	42.7343	0	32.6492	30.0576	12.6943	30.3035	41.2979	0	49.8851	7.60945	30.4321	32.1213	0	31.9017	11.174	31.5518	17.2329	0
Ccdc170	0	0	0	0	0	0	0	0	0	0	0	0	0	0	0	0	0	0	0	0	0	0	0	0	0	0	0	0	0	0	0	0	0	0	0	0	0	0	0	0	0	0	0	0	0	0	0	0	0
Ccdc174	0	0	0	0	0	0	0	0	0	0	0	0	0	0	0	0	0	0	0	0	0	59.4737	0	0	0	0	0	0	0	0	0	0	0	0	0	0	0	0	0	0	0	0	0	0	0	0	0	0	0
Ccdc180	0	0	0	0	0	0	0	0	0	0	0	0	0	0	0	0	0	0	0	0	136.491	0	0	0	0	0	0	0	0	0	0	0	0	0	0	0	0	0	0	0	0	0	0	0	0	0	0	0	0
Ccdc181	0	0	0	0	234.574	0	0	0	0	0	0	0	0	0	0	0	0	0	0	0	0	0	0	72.3527	0	0	0	0	0	0	0	0	0	0	0	0	0	0	0	0	0	0	0	0	0	0	0	0	0
Ccdc190	0	0	0	0	0	0	0	0	0	0	0	0	0	0	0	0	0	0	0	0	0	0	0	0	0	0	0	0	0	0	0	0	0	0	0	26.327	0	0	0	0	0	0	0	0	0	0	0	0	0
Ccdc22	0	0	70.712	0	92.6316	78.7134	0	56.0185	105.26	38.1195	160.849	131.988	98.2657	91.1607	77.1122	94.7207	103.482	187.563	107.57	161.738	98.0153	91.9772	138.81	167.391	0	0	161.727	152.988	93.1206	163.2	175.857	119.703	77.5521	118.316	124.56	122.341	57.8279	0	174.304	0	100.871	182.867	78.0139	141.71	129.788	111.785	98.7937	195.301	72.0675
Ccdc25	0	0	0	0	0	0	0	0	0	0	30.4847	33.1001	8.32575	15.5887	43.8489	0	17.2277	29.4639	0	0	0	0	17.7469	11.9767	0	0	60.2657	50.1272	17.4371	68.3906	15.9182	0	0	36.0024	93.3556	31.4014	0	0	0	0	68.2923	74.4702	68.8144	0	19.5738	24.2371	0	28.6615	0
Ccdc28b	0	0	0	0	0	0	0	0	0	0	0	0	0	0	0	0	0	0	0	0	0	0	0	5.32696	0	0	0	0	0	0	0	0	0	0	0	27.3674	0	0	0	0	0	0	0	0	0	0	0	15.4225	0
Ccdc30	0	0	0	0	0	0	0	0	0	0	0	0	0	0	0	0	0	0	0	0	0	0	0	0	0	0	0	0	0	0	0	0	0	0	0	0	0	0	0	0	0	0	0	149.938	0	0	0	0	0
Ccdc32	0	0	0	0	0	0	0	0	0	0	0	0	0	0	0	0	0	0	0	0	0	78.6057	0	0	0	0	0	0	0	0	0	0	0	0	0	0	0	0	0	0	0	0	0	0	0	0	0	0	0
Ccdc43	61.4774	0	0	0	40.3382	31.9983	0	30.6453	83.7102	63.3487	50.156	39.0093	31.0293	52.9192	20.0313	19.1809	21.3573	28.731	140.393	109.174	26.3519	18.1259	60.5722	31.8781	135.639	130.157	26.2802	27.2135	48.4591	25.1337	87.873	31.9437	81.9488	53.4282	0	30.1565	108.721	77.1231	268.681	140.784	29.4051	23.5748	43.2194	26.7329	19.6153	34.9926	97.7049	0	0
Ccdc47	81.8076	0	0	0	162.055	263.513	118.122	220.299	179.293	173.121	189.675	168.947	131.148	74.3937	145.644	165.355	161.03	122.545	0	174.896	167.485	114.508	167.149	112.016	65.0473	158.886	104.166	108.694	185.601	171.195	135.59	205.538	130.992	51.3543	241.222	234.129	135.546	196.57	102.527	137.978	194.048	162.378	71.2909	96.0282	95.7308	95.9762	99.4087	140.828	117.022
Ccdc50	23.0196	0	0	0	108.423	0	101.126	0	0	19.3399	0	26.0293	29.1266	20.5656	109.298	115.812	46.7575	0	0	83.3509	158.249	104.88	49.1393	38.7788	0	28.2448	0	103.332	79.1162	24.0044	100.324	0	61.1276	0	27.3462	34.6144	0	0	0	0	26.2476	0	0	65.6969	97.5721	76.5963	49.7811	51.8699	0
Ccdc51	0	0	0	0	0	0	0	0	0	0	0	187.324	48.955	0	10.9595	7.73825	0	0	0	0	0	56.6648	33.9487	67.3343	0	0	0	0	58.2892	0	17.3019	0	0	106.951	0	0	0	0	0	0	0	42.7683	54.8269	0	0	0	0	31.297	0
Ccdc58	78.9863	37.0614	46.54	132.055	76.7491	99.8429	62.8429	178.604	67.3797	82.2267	101.658	67.8132	81.3495	97.1681	91.1827	42.5357	61.4457	63.3437	108.704	93.1156	85.3068	110.327	85.745	57.6812	84.3408	153.611	129.071	157.064	96.5274	109.968	50.6183	16.3831	49.4941	45.9609	104.431	164.01	95.1279	95.037	136.102	82.1828	76.9758	104.536	58.0766	63.0494	24.1954	44.5564	13.546	53.549	85.3172
Ccdc59	0	0	0	0	0	0	0	0	0	0	0	0	0	0	0	0	0	0	0	0	0	0	0	0	0	0	0	0	0	0	0	0	0	0	0	0	0	0	0	0	15.9578	5.66515	0	0	0	0	0	0	0
Ccdc6	176.365	0	106.061	43.0795	70.9426	34.1615	18.8383	93.8727	133.642	176.976	50.8547	39.6273	78.2488	53.842	105.437	113.759	35.6585	67.1682	0	70.1689	101.913	45.2808	82.3795	60.1425	0	0	44.5054	0	0	0	93.8998	134.109	79.6824	0	0	22.108	139.003	111.27	58.7421	46.9863	39.7631	14.4581	62.848	78.8972	57.4761	88.8396	82.3725	65.46	7.24962
Ccdc60	0	0	0	0	0	0	0	0	0	0	0	0	0	0	0	0	0	0	0	0	0	0	0	0	0	0	0	0	0	0	0	0	0	0	0	0	0	0	0	0	0	0	0	0	0	0	0	0	0
Ccdc66	0	0	0	0	0	0	0	0	0	0	0	0	0	0	0	0	0	0	0	0	0	0	0	0	0	0	0	0	0	0	0	0	0	0	0	0	88.7946	0	0	0	0	0	0	0	0	0	0	0	0
Ccdc69	0	0	57.9859	0	0	0	0	0	0	0	0	0	0	0	0	0	0	0	0	0	0	0	0	0	0	0	0	0	0	0	33.2962	26.4744	0	19.0581	0	0	0	0	0	0	0	0	0	0	0	0	0	0	0
Ccdc77	0	0	0	0	0	0	0	0	0	0	0	0	0	0	0	0	0	0	0	0	14.7339	0	0	0	0	0	0	0	0	0	0	0	0	0	0	0	0	0	0	0	0	0	0	0	0	20.4704	0	0	0
Ccdc8	0	0	0	0	0	0	0	0	0	0	0	0	0	0	0	62.2764	0	0	0	0	0	0	0	0	0	0	0	0	0	0	27.6325	0	9.88182	0	0	0	0	0	0	0	0	0	0	0	0	0	11.3096	0	0
Ccdc81	0	0	0	0	0	0	0	0	0	0	0	0	0	0	0	0	0	0	0	0	0	0	0	0	0	0	0	0	0	0	0	0	0	0	0	0	0	0	0	0	0	0	0	95.3399	0	0	0	0	0
Ccdc84	0	0	0	0	0	0	0	0	0	0	0	0	0	0	0	0	0	0	0	0	0	0	0	0	0	0	0	0	0	0	0	0	0	0	0	0	0	0	0	0	0	0	0	0	24.4539	0	0	0	0
Ccdc85b	0	0	0	0	0	0	0	0	0	0	0	0	0	0	0	0	0	0	0	0	0	162.06	0	0	0	0	0	0	0	0	0	0	0	0	0	0	0	0	0	0	0	0	0	0	0	0	0	0	0
Ccdc86	0	0	0	0	0	0	0	0	0	0	0	0	0	0	62.9368	74.9915	0	0	0	0	58.3718	0	51.2064	0	511.087	231.706	0	0	0	0	26.7431	116.645	119.484	77.6941	30.0204	0	154.406	148.825	111.571	155.59	37.9224	31.9257	66.2437	67.3378	124.762	59.712	164.065	17.7758	0
Ccdc88a	0	0	0	0	0	0	0	0	0	0	0	0	0	0	164.388	62.5311	42.4377	45.0711	0	0	154.854	215.838	35.7978	0	0	0	0	0	0	0	38.4936	0	0	0	0	0	0	0	0	0	0	19.0202	0	155.269	129.486	0	245.152	61.4933	0
Ccdc88b	58.0961	0	0	0	151.951	44.3756	0	326.944	107.432	131.43	134.61	69.1193	163.516	129.944	276.244	294.437	182.47	195.941	161.292	94.7187	417.497	442.279	212.281	189.179	0	0	121.151	0	96.6749	59.9072	206.041	141.575	125.739	105.075	44.4398	65.5301	0	0	0	0	15.9294	43.9072	116.543	235.905	289.417	287.072	267.403	173.461	0
Ccdc88c	0	0	0	0	0	0	0	0	0	0	0	0	0	0	0	0	0	0	234.984	0	169.249	261.577	0	0	0	0	0	0	152.126	0	43.6707	116.246	0	70.1642	34.6218	0	0	449.684	0	0	78.8134	19.2889	0	66.1991	90.1283	0	168.352	24.7135	0
Ccdc9	0	0	0	0	0	57.2595	0	0	0	0	76.8429	68.521	0	23.172	0	58.1202	46.9231	44.4562	0	0	0	0	22.5985	18.0461	73.2107	0	0	0	0	0	0	0	0	0	31.7347	18.5087	88.262	46.6863	49.6766	0	36.7855	31.1222	0	0	82.5333	8.34011	0	50.5392	0
Ccdc90b	17.875	0	0	0	76.9696	27.7551	0	0	70.4641	0	61.0583	66.8748	11.016	38.1771	48.6037	50.6693	56.8372	42.1442	0	120.891	210.215	260.195	98.5326	96.9684	0	0	14.9165	48.1167	32.6856	34.0585	0	0	0	0	0	0	0	0	0	0	0	10.1074	0	0	18.0151	0	0	29.7198	73.4641
Ccdc91	28.9707	0	0	0	6.23222	0	0	0	24.6373	0	34.7	22.4805	0	0	32.9873	50.8948	0	0	0	0	52.6621	0	0	0	0	0	0	0	18.9105	0	9.82444	0	0	0	0	0	0	0	0	0	0	0	0	0	0	12.0879	0	0	0
Ccdc93	0	0	0	0	16.725	31.6551	96.8765	96.9571	0	146.944	0	101.04	41.3456	58.2668	86.1927	194.021	103.787	55.2249	153.31	152.67	130.954	117.142	34.6851	108.489	0	0	9.06502	0	30.6122	67.9187	161.263	56.7093	71.7168	24.1229	0	0	28.8062	79.5478	0	0	53.6543	0	105.383	57.0787	127.704	117.082	33.1932	104.892	0
Ccdc94	0	0	60.0873	0	0	0	121.506	39.8468	52.8184	7.21196	0	0	20.8664	0	86.5942	145.088	0	2.35735	37.7982	0	47.4508	0	0	4.42374	80.4976	122.015	0	0	0	0	39.8203	26.142	137.753	73.6951	0	0	26.455	63.3224	83.4428	48.9625	0	0	46.7203	29.1991	100.062	82.4105	53.6467	0	69.164
Ccdc97	0	0	0	0	0	0	0	0	0	0	0	87.0088	0	0	0	0	0	8.33959	0	0	0	0	7.79553	7.37992	0	0	0	3.92197	0	0	0	27.777	0	0	0	9.15565	0	0	0	0	24.9991	17.6806	0	0	0	0	0	29.8786	0
Cchcr1	0	0	0	0	0	0	0	0	0	0	0	0	0	0	0	0	0	0	0	0	0	0	0	0	0	0	0	0	0	0	0	0	0	0	0	0	0	0	0	0	30.175	0	0	0	0	0	0	0	0
Ccm2	128.758	0	46.9974	0	57.6466	14.4426	39.8544	0	75.0444	46.5669	94.4719	45.3515	60.7656	81.1291	80.2706	112.368	32.1883	31.6359	93.0426	96.9208	102.064	177.378	34.6043	35.6206	17.2177	0	58.3392	51.6972	9.52178	27.7942	159.844	90.6894	97.2059	61.9864	89.4375	49.298	7.60362	0	0	0	38.4738	18.6532	34.3312	30.5347	39.2007	55.2103	41.7548	27.3109	90.9438
Ccna1	0	0	0	0	0	0	0	0	0	0	0	0	0	0	0	0	0	0	0	0	0	0	0	0	0	0	0	0	0	0	0	0	0	0	0	0	0	0	0	0	0	0	0	0	0	0	0	0	0
Ccna2	0	0	0	0	0	0	0	0	0	65.716	18.6386	46.1411	0	0	0	0	0	0	0	0	87.4079	98.8636	19.1139	32.3267	105.71	78.7476	120.925	119.127	140.687	124.902	53.066	52.9866	0	0	56.5284	16.1272	40.6133	86.6161	0	0	94.7058	94.7662	109.221	85.3089	87.5332	34.874	86.2804	51.7328	0
Ccnb1	0	0	0	0	0	0	0	0	0	0	0	0	0	0	0	0	0	0	0	0	14.8053	0	0	0	0	0	26.6329	21.0194	0	0	24.5	19.9762	0	0	0	0	28.8242	49.9645	0	0	8.05092	35.6442	15.999	10.0022	33.1753	19.4617	17.2871	19.2617	0
Ccnb2	0	0	0	0	0	0	0	0	0	0	0	0	0	0	0	0	0	0	0	0	25.6558	57.0553	0	0	0	0	0	11.6924	0	0	0	0	0	0	0	0	0	0	0	0	0	0	0	0	0	0	0	8.89112	0
Ccnb3	0	0	0	0	0	0	0	0	0	0	0	0	0	0	0	0	0	0	0	0	0	173.64	0	0	0	0	0	0	0	0	0	0	0	0	0	0	0	0	0	0	0	0	0	135.303	176.45	0	171.93	0	0
Ccnd2	0	0	0	0	0	0	0	0	0	0	33.8113	0	6.7895	0	13.4746	0	9.25812	0	0	0	0	74.2177	0	0	0	0	0	0	0	0	0	0	0	0	0	0	0	0	0	0	0	0	0	0	0	0	0	0	0
Ccnd3	0	0	0	0	0	0	0	0	0	0	0	0	23.6578	35.9815	0	0	8.94776	14.0114	0	0	0	0	0	0	71.1645	0	91.4887	68.1065	59.428	94.8673	0	61.0753	21.8885	0	0	0	0	0	0	0	0	0	0	0	9.07603	8.59814	57.6641	0	0
Ccndbp1	0	0	0	0	0	0	0	0	0	0	0	0	0	0	0	0	0	0	0	0	0	0	0	0	0	0	0	0	0	0	18.3955	0	0	0	0	0	0	0	0	0	0	0	0	0	0	0	0	0	0
Ccne1	0	0	0	0	0	0	0	0	0	0	0	0	0	0	0	0	0	0	0	0	0	0	0	0	0	0	0	0	0	0	0	0	0	0	0	0	0	0	0	0	0	0	0	115.088	0	0	0	0	0
Ccnh	0	0	0	0	0	0	0	0	0	0	17.1598	6.9823	70.728	0	6.52384	38.0249	5.00545	18.151	0	0	14.2928	33.2498	38.4414	8.14055	0	0	21.1219	41.5013	0	0	0	16.665	0	127.02	7.85311	4.81939	40.754	0	0	0	42.1284	64.706	45.4396	61.7382	20.2111	25.8393	63.1736	35.2113	0
Ccnk	0	0	0	0	0	0	0	0	15.1875	39.0717	51.0308	37.8402	32.983	0	80.1518	46.5001	52.2072	34.1009	136.335	0	49.9686	71.1977	26.5071	67.6128	115.387	118.945	0	16.1371	0	0	191.742	54.2906	23.4163	97.5834	32.0318	49.4482	74.8517	146.108	0	0	65.9912	55.9672	12.388	48.9172	50.1391	34.7529	89.179	38.0293	0
Ccnl1	0	0	0	0	0	0	0	0	0	0	28.8365	0	0	0	0	0	57.2729	0	0	0	0	0	0	0	0	0	0	0	26.9728	0	30.8443	0	0	0	0	0	0	0	0	0	0	0	0	28.8438	51.0111	60.9352	0	62.2281	0
Ccnl2	0	0	0	0	0	0	0	0	39.5461	0	0	0	0	0	23.8998	22.5984	0	29.2208	20.9157	32.6574	0	0	0	0	0	41.3228	0	0	13.0602	41.3044	14.6147	22.5103	0	21.7506	0	0	6.20404	0	0	26.7949	20.5665	42.6406	25.8512	16.2295	17.7705	31.9588	133.282	0	0
Ccnt1	0	0	0	0	0	0	0	0	0	0	70.3041	61.116	9.26684	0	91.8378	40.626	91.0591	59.863	0	51.1623	64.864	88.343	66.3878	76.6057	0	0	77.718	58.1108	32.6282	53.1719	70.4623	0	81.6297	4.27356	104.695	57.3389	0	0	4.41293	14.7189	95.604	58.9963	20.4273	31.8226	11.9934	92.1806	49.1203	46.2928	0
Ccny	0	0	0	0	42.9445	57.9896	0	0	82.9096	0	46.9144	14.2649	9.2364	0	4.49909	0	24.0153	14.7364	0	0	39.4865	16.0966	45.1944	15.4961	0	0	0	0	0	0	0	0	0	0	22.1674	38.8958	0	0	0	0	57.4723	63.9552	0	0	0	0	0	27.9783	0
Ccp110	0	0	0	0	0	0	0	0	0	0	0	0	0	0	0	0	0	0	29.3466	0	0	0	0	0	0	0	0	0	0	0	0	63.0557	7.23839	60.2492	0	0	0	0	0	0	0	0	0	0	56.4207	6.60132	0	0	0
Ccpg1	0	0	0	0	0	0	0	0	0	0	0	0	0	0	0	0	0	33.5411	0	0	0	0	0	0	0	0	0	0	0	0	0	0	0	0	0	0	0	0	0	0	0	0	0	0	0	0	0	59.9223	0
Ccs	0	0	0	0	0	0	0	0	0	20.4096	11.9699	7.96986	0	0	29.5089	46.5453	7.92822	29.9928	42.4034	0	58.3575	55.1251	31.318	21.9196	0	0	0	0	0	0	17.5328	48.2001	0	55.9699	22.5695	13.1268	18.4829	22.8538	0	0	42.0826	35.9621	19.101	20.4441	23.8134	0	0	29.8098	0
Cct2	1111.85	1877.4	1509.89	2212.69	1521.76	1505.65	1697.13	1674.32	1610.71	1548.61	1249.06	1433.17	1152.31	1697.94	1310.26	1458.84	1428.27	1791.65	1437.44	1991.39	1657.3	1335.77	1739.33	1548.57	1445.7	1683.2	1845.2	1889.08	1619.4	1747.39	1216.81	1489.78	2227.52	1891.39	1571.49	1469.8	1818.95	1935.88	2943.09	2702.56	1764.44	2045.12	1983.61	1693.84	1980.33	1720.02	1838.25	1708.94	1373.84
Cct3	292.43	1085.31	679.543	558.633	708.396	793.46	1022.35	879.948	1040.77	933.668	1079.5	1106.04	1361.93	1167.22	605.581	859.721	1008.3	1119.43	996.398	1094.81	528.029	746.641	1016.03	1098.45	732.237	965.464	1235.27	1317.76	1058.65	1071.13	860.631	893.061	594.611	950.38	1179.77	1234.46	1118.22	1347.05	835.014	776.91	1359.21	1329.73	1011.64	1257.78	1048	1423.17	718.675	1149.96	694.009
Cct4	303.33	730.893	578.712	344.803	604.535	517.68	830.429	667.541	684.117	669.001	675.041	672.912	1492.03	1052.91	679.875	534.417	768.932	663.065	769.015	881.222	531.323	305.693	787.307	747.647	913.097	784.125	785.211	761.171	897.915	872.493	797.084	823.844	642.762	1014.63	849.783	709.939	908.837	1025.61	629.991	1019.12	981.487	1020.8	868.823	1314.25	1300.47	1082.74	938.958	957.146	654.469
Cct5	1255.81	1073.32	1077.59	1280.01	822.223	766.067	1135.82	1269.2	885.73	961.28	867.514	1055.22	1385.64	1398.19	1041.56	999.321	972.48	974.105	1119.41	1331.14	1105.5	1511.71	953.827	972.531	1316.93	1236.44	1000.36	809.249	843.779	949.253	1009.85	1183.01	1360.49	1234.83	821.903	889.99	1447.25	1444.23	1240.65	1380.46	1274.38	1357.86	1449.7	1839.26	1398.43	1363.43	1591.92	1454.42	1063.66
Cct6a	788.366	805.148	1060.89	1041.99	984.396	855.605	931.168	1011.93	924.226	979.603	1146.63	912.363	1272.88	1044.2	759.859	695.523	1115.92	970.546	846.796	1307.91	1081.69	1263.6	1184.95	1176.49	1075.61	771.79	1227.86	1166.87	1206.27	1302.67	761.566	897.547	1610.91	953.945	1087.4	810.33	973.829	920.944	2156.27	1641.33	1377.89	1290.2	900.124	1686.77	1561.58	1467.95	1418.95	1602.39	1134.5
Cct7	374.939	895.244	773.769	402.981	726.817	879.782	877.323	1091.91	762.874	857.009	576.85	704.192	766.591	874.127	764.654	757.225	771.698	685.974	894.68	1106.19	511.481	322.065	711.894	661.176	734.905	735.449	1070.59	995.926	940.308	1014.86	809.993	724.92	797.442	923.728	724.656	680.339	1281.22	1160.95	1119.83	773.431	899.178	919.551	903.731	1215.9	1417.54	1069.6	748.974	887.086	841.181
Cct8	688.362	1380.66	778.53	836.323	1008.14	1235.62	1923.16	1818.82	1455.94	1627.11	946.893	1023.2	1196.42	1501.23	950.7	985.048	1016.79	1049.03	1574.47	1861.11	762.016	391.786	996.973	1051.82	1815.56	1850.39	1385.01	1420.51	1807.69	1362.24	1639.96	1163.25	1339.23	1632.57	1121.02	1133.88	2155.03	2352.79	1957.71	1519.65	1489.7	1481.09	1746.96	1474.19	1408.47	1766.12	1379.25	1205.4	1179.64
Ccz1	0	0	0	0	37.1303	141.997	0	0	0	0	71.7755	46.7234	57.1673	42.0232	17.1616	0	58.0505	87.7378	0	86.5948	20.1204	0	35.2167	67.0231	0	0	25.5876	73.8491	48.8397	147.667	55.5812	26.9505	0	34.362	37.2478	73.1153	0	0	0	0	91.5997	64.4894	90.0585	67.1509	141.193	55.6405	101.108	116.269	93.0052
Cd14	0	0	0	0	0	0	0	0	0	0	0	0	0	0	0	15.8729	0	0	0	0	0	0	0	0	0	0	0	0	0	0	0	0	0	0	0	0	0	0	0	0	0	0	0	0	0	0	0	0	0
Cd151	0	0	0	0	79.3275	0	22.4327	0	19.067	52.2958	12.755	32.1168	0	0	34.9339	42.4698	3.06832	22.5006	0	0	17.8995	0	2.00073	0	0	0	0	0	0	0	0	0	0	0	0	0	0	0	0	0	0	0	0	0	0	0	0	0	0
Cd163	0	0	0	0	0	0	0	0	0	0	113.431	0	0	0	0	0	50.8636	0	0	0	0	0	0	0	0	0	0	0	0	0	0	0	0	0	0	0	0	0	0	0	0	0	0	0	0	0	0	0	0
Cd164	0	0	0	0	0	0	0	0	0	0	0	0	0	0	0	0	0	0	0	0	0	0	0	0	0	0	0	0	0	0	0	0	0	0	0	0	0	0	0	0	0	0	0	0	0	0	0	0	0
Cd180	0	0	0	0	0	0	0	0	0	0	0	0	0	0	33.0094	6.8954	11.592	0	0	40.8472	107.074	37.0416	0	0	44.4303	16.1934	79.9578	116.665	117.938	116.317	37.3985	20.1171	25.1486	3.71764	6.33248	27.1804	0	0	0	0	0	0	14.1513	20.2534	54.8505	20.6042	48.23	40.8592	0
Cd1d1	0	0	0	0	20.628	108.174	0	0	0	0	29.0874	60.09	25.9973	0	15.8895	0	44.6326	35.4024	0	0	26.0393	30.4988	47.4615	65.6786	0	0	81.7084	31.4071	36.4199	49.1954	13.9454	0	0	0	37.7156	49.2626	0	0	0	0	35.5885	60.5391	0	0	0	0	0	35.0461	0
Cd200r1	31.2407	0	0	0	0	0	0	0	0	0	0	0	0	0	0	0	0	0	0	0	0	0	0	0	0	0	0	0	0	0	0	0	0	0	0	0	0	0	0	0	0	0	0	0	0	0	0	0	0
Cd200r3	0	0	0	0	0	0	0	0	0	0	0	0	0	0	0	0	0	0	0	0	0	0	0	0	0	0	0	0	0	0	61.9419	0	0	0	0	0	0	0	0	0	0	0	0	0	0	0	0	0	0
Cd244	0	0	0	0	0	0	0	0	0	0	0	0	7.32911	0	0	0	0	0	63.4071	0	0	57.6026	0	17.8221	0	0	0	0	0	0	0	0	112.613	0	0	0	0	0	0	0	0	0	0	0	0	0	0	0	0
Cd27	0	0	0	0	0	0	0	0	98.0742	49.0892	28.886	25.8419	20.7836	0	48.411	67.397	11.4915	0	174.551	0	0	0	19.9799	39.8681	0	54.9396	0	0	0	0	78.4433	111.288	61.0239	70.6469	0	0	0	0	0	0	0	0	0	0	0	0	0	0	0
Cd2ap	59.7319	0	357.909	0	28.4566	23.324	0	0	0	68.5116	138.236	119.834	83.1535	0	93.8739	98.795	104.825	51.8722	126.722	114.685	176.844	140.617	112.108	223.705	187.952	52.6963	180.904	124.022	366.735	168.263	70.4601	0	47.7833	0	26.7422	9.79126	0	0	0	0	0	0	0	0	0	0	45.7111	54.2185	0
Cd2bp2	81.2694	0	41.7958	0	56.4519	106.377	82.6749	63.32	107.327	146.868	69.1409	107.16	76.875	94.5719	35.9238	45.87	64.9525	92.2333	106.233	108.375	41.3443	0	101.767	61.7162	311.324	196.843	94.96	102.675	50.0187	111.198	134.61	124.033	86.2771	114.717	78.7387	68.2082	141.276	105.833	163.732	93.8256	78.0842	89.8942	43.7039	157.797	98.0322	109.417	77.1788	44.7528	8.06069
Cd300a	0	0	0	0	0	0	0	0	0	0	0	0	0	0	33.0039	0	0	0	0	0	0	0	0	0	0	0	0	0	0	0	0	0	0	0	0	0	0	0	0	0	0	0	0	0	51.933	0	45.8778	0	0
Cd34	0	66.8853	0	172.315	63.7219	203.037	0	0	82.9044	30.8037	74.8306	209.845	34.2764	111.178	101.501	79.2379	244.656	254.642	131.136	14.3757	152.351	253.003	177.099	207.297	78.4879	80.22	82.9379	38.1053	185.904	287.502	120.295	0	210.684	133.96	170.611	186.884	0	0	0	0	0	0	125.623	0	47.2244	0	103.137	129.743	0
Cd36	0	0	0	0	0	0	0	0	0	0	0	0	0	0	0	0	0	0	0	0	0	0	0	0	0	0	0	0	0	0	0	0	0	0	0	0	0	0	0	0	3.42673	0	0	0	0	0	0	0	0
Cd38	0	0	0	0	46.4521	63.3395	0	0	0	0	0	0	0	0	0	0	24.863	0	0	0	0	0	0	0	0	0	0	0	0	0	0	0	0	0	0	0	0	0	0	0	0	0	0	0	0	0	0	0	0
Cd3eap	0	0	0	0	0	0	0	0	0	0	20.2604	71.7886	60.4461	29.1707	59.2047	33.5573	44.8324	59.1773	120.1	0	30.4783	0	58.0513	48.4433	86.6585	125.356	77.9193	77.7297	10.5274	98.1061	109.126	122.338	78.258	104.035	125.267	56.0915	109.879	108.566	16.4716	21.1496	100.971	135.972	51.9406	68.7571	58.7681	37.4127	81.9674	57.6369	0
Cd44	256.969	1863.15	38.2346	322.326	144.076	214.05	276.622	267.734	235.849	658.351	119.927	81.1487	173.998	273.472	183.233	284.568	56.1597	99.4771	429.512	210.511	147.471	88.8793	208.174	231.607	431.169	214.532	163.568	139.305	211.105	198.649	115.779	205.112	185.119	205.732	90.7018	146.135	189.818	271.63	101.474	259.904	151.27	124.298	177.573	92.8437	128.257	112.877	134.941	92.3137	160.284
Cd47	282.472	402.938	162.985	364.204	315.441	223.449	105.333	302.993	261.382	286.631	197.495	188.355	130.619	273.715	458.732	466.367	185.718	359.405	153.881	312.222	112.571	450.342	326.496	261.225	180.165	356.021	163.339	165.687	421.536	296.5	113.899	204.78	707.348	253.136	158.413	176.961	237.625	174.566	323.18	358.531	224.778	272.562	169.909	223.458	212.316	148.101	384.209	165.315	304.806
Cd48	0	0	0	0	0	0	69.0374	106.042	88.7769	102.558	42.7279	38.4287	178.634	109.356	94.5868	127.332	65.2289	55.6289	173.316	86.0655	128.842	50.7697	46.525	73.3258	89.8789	279.162	68.8067	93.0915	148.916	158.791	244.807	105.75	161.056	103.455	61.9118	82.7976	91.1946	87.2176	99.5263	144.707	26.9948	47.9133	104.553	126.177	96.4409	119.893	131.149	106.476	0
Cd63	0	0	0	0	0	0	0	0	0	0	35.0191	18.4183	0	0	20.8697	20.8353	0	32.3407	0	0	0	0	0	0	0	0	0	0	0	0	20.723	0	0	0	0	0	0	0	0	0	0	0	37.5683	21.8465	19.5706	16.2832	0	60.6126	26.7577
Cd72	0	0	0	0	0	0	0	0	0	0	0	0	0	0	48.6445	49.2733	0	0	0	0	75.1596	0	19.7747	8.32244	0	0	0	0	0	0	0	0	0	0	0	0	0	0	0	0	0	0	0	0	0	0	0	0	0
Cd74	42.1168	0	115.505	0	56.7854	58.1865	0	0	0	0	0	0	0	0	0	0	10.7276	39.3124	0	0	0	0	32.0932	25.4514	0	0	0	0	0	0	0	0	0	0	0	0	0	0	0	0	0	0	0	0	0	0	0	0	122.144
Cd79a	0	0	0	0	0	0	0	0	0	0	0	0	0	0	0	0	0	0	0	0	0	0	0	0	103.312	79.5679	98.6495	130.007	0	0	0	0	0	0	0	0	0	0	0	0	0	0	0	0	0	0	0	0	0
Cd81	0	0	0	0	0	0	0	0	0	0	81.1605	49.0938	16.3654	0	46.5672	45.5336	43.587	30.1805	0	0	0	27.98	80.1384	62.0669	0	0	36.9951	39.4833	0	0	0	0	0	0	51.9754	27.9926	0	0	0	0	67.5489	19.339	0	0	0	3.91218	0	30.4823	24.0408
Cd82	0	0	0	0	28.5876	0	0	0	0	29.3342	504.746	13.0456	30.9114	0	41.149	8.27895	30.4659	14.9999	0	30.6129	19.6397	29.5026	434.665	29.3829	0	0	0	0	0	0	14.5063	10.8465	0	0	0	0	0	0	0	0	314.803	9.35669	0	0	0	299.333	0	0	0
Cd84	0	103.091	70.3148	26.2781	166.89	157.71	71.8061	66.9431	70.6993	53.6924	40.8907	34.463	46.6336	15.3249	13.3501	11.1014	60.2566	40.7965	78.1008	85.987	18.5276	0	99.3581	56.1166	0	0	0	0	0	0	46.0557	0	38.9362	0	18.9162	22.5865	0	0	0	0	33.9142	41.0575	0	0	0	36.4658	0	46.9081	145.715
Cd86	0	0	0	0	0	0	0	0	0	0	0	0	0	0	0	0	27.747	31.9622	0	46.1331	0	48.1916	21.4503	0	0	0	0	0	0	0	0	0	0	0	0	0	0	0	0	0	0	0	0	0	0	0	0	0	0
Cd9	0	0	0	0	0	0	9.66172	39.6191	0	0	20.4769	59.4155	0	0	0	0	0	0	0	0	0	0	0	0	0	0	0	0	0	0	0	0	0	0	0	17.4214	0	0	0	0	0	0	0	0	0	0	0	0	53.3958
Cd93	0	0	0	0	0	0	0	0	0	0	56.0108	35.3616	0	0	109.925	0	11.9915	11.1857	0	0	0	0	24.3781	14.0303	0	0	54.9916	38.4216	82.2252	39.6393	0	0	0	0	0	32.717	0	0	0	0	0	0	0	0	0	22.7231	0	21.0105	0
Cd99	0	0	0	0	0	0	0	0	85.7104	41.0352	0	0	0	0	32.9873	42.1657	0	0	27.7695	0	0	75.6201	0	0	62.4243	76.5763	0	0	0	0	49.8585	0	0	19.5736	0	0	0	0	0	0	0	0	0	0	0	0	0	0	0
Cd99l2	89.4832	0	0	0	0	0	0	0	0	0	0	0	0	0	33.3307	112.324	0	0	0	0	94.5836	74.5522	0	0	0	0	0	0	0	0	58.8827	13.0502	0	0	0	0	0	0	0	0	0	0	0	0	0	0	0	0	0
Cdadc1	0	0	0	0	0	0	0	0	0	0	0	0	0	0	0	0	0	0	0	0	0	0	0	0	0	0	0	0	0	0	0	24.2037	0	49.5868	0	0	0	0	0	0	0	0	0	0	0	0	0	0	0
Cdan1	0	0	0	0	0	0	0	0	0	0	0	0	0	0	81.1255	0	0	0	0	0	80.8733	95.3655	5.95241	0	0	0	0	43.5366	0	0	0	27.1119	0	55.6375	0	9.93072	0	0	49.3038	0	9.67055	48.3747	20.4049	0	0	23.8005	18.009	9.73051	0
Cdc123	0	0	0	0	60.4274	0	0	0	132.229	43.6555	52.1491	50.6934	53.8069	50.054	263.665	65.7171	71.8066	76.3601	67.647	64.1329	54.4087	69.8105	68.8687	47.2962	16.3021	38.6546	66.1374	94.275	62.5996	77.157	153.77	124.466	65.5304	120.15	77.6129	60.8062	108.573	134.245	188.765	202.724	65.7048	101.712	124.104	104.81	69.2774	85.492	111.207	78.9896	0
Cdc16	0	82.0758	133.604	0	154.749	108.632	207.387	128.909	152.207	122.515	120.894	145.194	74.2091	68.3911	177.736	81.1903	186.001	174.944	153.825	179.288	83.2965	99.1957	149.169	128.921	66.4244	117.06	123.402	148.399	215.156	211.044	146.184	80.9143	21.8161	42.4775	122.646	125.29	25.9395	191.74	0	32.1906	43.8347	78.1759	81.4575	95.8779	96.3931	130.711	50.3233	98.0421	77.9569
Cdc20	0	0	0	0	0	0	0	0	0	0	0	0	0	0	0	0	0	0	0	0	0	0	0	0	0	0	0	0	0	0	0	0	0	0	0	0	0	0	0	0	0	0	15.7227	0	0	0	0	14.6417	0
Cdc26	0	0	0	124.996	0	42.4549	58.9093	63.6008	86.1548	70.3339	0	46.9925	22.3805	47.3041	82.9384	188.565	0	0	104.122	88.6573	171.898	67.7226	56.0408	41.6547	167.962	155.851	0	0	0	0	129.393	122.939	86.2832	103.271	48.6277	61.1824	109.536	167.599	297.546	53.0009	0	0	158.512	50.4038	50.1036	83.076	85.5325	0	45.2932
Cdc27	0	0	0	0	0	0	0	0	0	0	0	0	111.658	0	49.9745	48.8491	0	0	30.6071	0	0	25.4386	15.7496	0	0	0	40.6193	40.5756	173.944	63.1024	72.212	22.8619	11.6762	22.2302	0	0	1.01339	103.525	0	0	0	42.945	0	76.8978	64.7624	69.1445	18.9565	30.603	0
Cdc34	0	0	0	0	0	0	0	0	0	0	0	0	0	0	0	0	0	0	18.3709	0	0	36.2417	7.46937	0	0	0	20.9949	26.7644	23.1022	0	14.6355	24.822	0	48.0728	0	0	0	0	0	0	61.9392	92.7256	97.883	27.726	17.0495	40.5726	73.8903	79.4562	0
Cdc37	918.274	416.034	273.734	613.138	396.567	508.237	445.896	432.726	227.019	413.643	425.192	472.93	678.548	666.868	353.349	265.62	464.784	599.176	468.429	333.845	351.315	77.1925	510.043	529.832	637.795	744.506	513.19	556.855	364.285	388.233	497.01	463.163	341.542	436.85	564.934	618.683	552.584	461.381	530.61	476.587	615.553	480.122	495.199	371.24	383.401	363.654	510.042	543.214	535.245
Cdc37l1	0	0	0	0	0	0	0	0	0	0	0	0	16.8927	0	32.5446	51.6852	0	44.7224	0	0	120.183	70.5841	11.6197	22.9264	0	0	41.3203	0	0	0	26.494	31.4323	0	0	0	7.83424	0	0	0	0	0	0	0	0	0	0	34.186	51.4758	0
Cdc40	73.5448	0	0	0	181.946	225.965	153.587	68.7401	149.542	117.723	230.693	193.903	126.921	138.422	238.91	210.291	239.479	282.076	58.6205	69.3864	81.7126	76.8712	201.529	224.67	254.598	158.168	231.28	215.463	150.442	223.8	196.833	225.029	397.13	171.845	278.252	248.412	136.758	87.526	150.183	199.004	270.321	246.215	166.735	120.785	152.23	278.506	198.838	218.643	193.72
Cdc42	513.788	1038.32	741.734	850.626	627.853	579.087	570.657	407.585	773.506	853.404	630.119	591.721	490.104	514.049	636.92	623.065	600.666	634.229	536.97	862.832	577.822	792.73	729.529	567.373	785.432	962.177	592.219	585.367	586.661	704.215	727.881	644.108	800.254	742.194	667.483	690.728	565.611	330.58	423.984	712.54	518.578	476.434	798.247	368.531	698.772	1001.62	784.138	729.36	643.152
Cdc42bpb	0	0	0	0	0	0	0	0	0	0	0	0	0	0	0	0	0	0	0	0	0	194.936	0	0	0	0	0	0	0	0	0	0	0	0	0	0	0	0	0	0	0	0	0	0	0	0	0	0	0
Cdc42ep3	0	0	0	0	0	0	0	0	0	0	0	0	0	0	0	0	0	0	0	0	0	0	0	0	0	0	0	0	0	0	0	23.941	0	0	0	0	0	0	0	0	0	0	0	0	0	0	0	0	0
Cdc42ep4	0	0	0	0	0	0	0	0	0	0	0	0	0	0	0	0	0	0	0	0	0	0	0	0	0	0	0	0	0	0	0	27.0712	37.5233	16.3918	0	0	0	0	0	0	52.2254	68.2076	87.02	92.5491	155.194	62.794	176.199	38.8501	35.6696
Cdc42se2	0	0	0	0	0	0	0	0	0	0	7.83277	12.0058	33.0984	0	0	0	12.5638	24.4812	0	0	0	0	9.49276	14.0118	0	0	15.5368	19.5435	0	0	0	19.6802	0	13.9377	10.3195	12.7346	0	0	0	0	0	0	0	0	0	0	0	8.42247	13.705
Cdc45	0	0	0	0	0	0	0	0	0	0	0	0	0	0	0	0	0	0	0	0	0	0	0	0	0	0	8.63395	8.64984	0	0	0	0	0	0	0	0	0	0	0	0	0	0	0	0	11.0014	20.6671	0	62.124	0
Cdc5l	471.647	1363.3	492.034	97.606	282.036	475.571	374.043	576.868	839.914	764.27	613.908	571.792	505.23	614.557	684.342	608.148	618.075	576.854	792.311	562.871	786.191	629.19	793.668	582.949	1831.81	976.844	1159.15	531.099	744.761	888.304	437.751	714.935	432.691	686.257	673.797	1001.74	658.592	710.18	1134.76	667.542	838.366	667.761	404.58	481.987	512.472	350.077	410.639	394.674	568.36
Cdc73	0	0	0	0	0	0	0	0	73.1251	0	102.665	36.6836	41.698	9.23087	94.6663	115.033	89.5344	78.7361	83.4833	0	91.5815	83.0478	91.9512	77.0211	0	0	80.7713	48.5274	151.001	73.5224	119.017	94.037	93.8161	56.6969	91.707	127.359	124.708	234.195	18.4156	0	149.339	165.618	95.3888	134.384	94.7571	138.819	82.6152	182.723	0
Cdca2	0	0	0	0	0	0	0	0	0	0	0	0	18.9391	0	0	0	0	0	208.914	0	102.477	137.531	23.3508	0	143.603	115.613	51.673	49.2271	0	0	62.8173	87.6074	0	75.1198	0	75.4566	74.0311	0	0	144.762	116.01	157.104	59.3786	165.954	183.612	90.9684	151.144	134.876	0
Cdca3	0	0	0	0	0	0	0	0	0	0	21.172	0	3.18539	0	23.0682	3.73145	0	0	0	0	30.2674	0	24.0402	20.8612	45.0429	75.5403	123.921	146.317	170.781	49.883	10.9459	22.6998	27.6597	22.7059	45.378	19.7641	35.8049	0	0	0	40.6925	17.6218	53.9012	24.5567	24.3239	20.9765	36.9069	11.3432	0
Cdca5	0	0	0	0	0	0	0	0	0	0	0	0	4.58247	0	9.56066	1.72841	0	0	0	0	10.3683	0	0	3.06924	13.301	0	0	0	0	0	6.97105	0	0	10.1954	2.83058	16.7858	0	0	0	0	0	21.7098	16.1376	0	9.58323	0	0	0	0
Cdca7	0	0	0	0	0	0	0	0	0	0	22.1567	0	6.58484	0	72.2939	68.9762	7.36412	25.2805	40.717	0	198.649	62.94	23.2937	31.2626	0	0	26.2352	58.5653	0	0	0	73.7238	0	97.163	58.3145	36.5987	0	0	0	0	25.155	53.0677	75.1595	43.0675	37.649	2.74474	92.5819	52.0467	0
Cdca7l	0	0	196.269	0	206.231	179.907	283.925	155.903	194.349	124.759	61.5466	40.1404	34.7453	0	69.1013	96.5496	25.7635	25.4548	122.167	147.247	129.837	0	34.7069	43.7987	0	0	20.6511	30.0708	45.0658	33.1554	78.3892	106.03	77.8019	59.5843	26.5727	26.4516	0	0	83.9769	479.991	47.9572	70.3308	0	0	0	0	0	0	0
Cdca8	0	0	0	0	0	0	0	0	0	0	29.7126	51.5263	21.1703	0	0	0	26.9836	0	0	0	127.828	0	25.5842	46.0181	45.1296	161.199	113.825	166.527	147.954	105.506	44.4704	98.6362	317.697	110.178	195.684	94.2237	148.888	71.3291	240.941	118.816	111.414	73.1642	77.092	139.957	275.489	111.59	187.99	85.1621	0
Cdcp1	0	0	0	0	0	0	0	0	0	0	0	0	0	0	0	0	0	0	0	0	0	0	0	0	0	0	0	0	0	0	0	0	0	0	0	0	0	0	0	0	0	0	0	0	0	0	0	0	0
Cdh11	128.897	0	0	0	211.957	105.531	0	0	0	0	0	0	0	0	0	0	0	0	0	0	0	0	0	0	0	0	0	0	0	0	0	0	0	0	0	0	0	0	0	0	0	0	0	0	0	0	0	0	0
Cdh13	53.7737	0	0	0	0	0	0	0	0	0	0	0	0	0	0	0	0	0	0	0	0	0	0	0	0	0	0	0	0	0	0	0	0	0	0	0	0	0	0	0	0	0	0	0	0	0	0	0	0
Cdh2	50.2069	0	0	0	37.4254	0	0	0	0	0	0	0	0	0	0	0	0	0	0	0	0	0	0	0	0	0	0	0	0	0	0	0	0	0	0	0	0	0	0	0	0	0	0	0	0	0	0	0	0
Cdh5	0	0	0	0	0	0	0	0	0	0	0	0	0	0	0	0	0	0	0	0	0	0	0	0	0	0	0	0	0	0	0	0	0	0	0	0	0	0	0	0	0	0	0	0	0	0	0	0	0
Cdh6	23.4554	0	0	0	0	0	0	0	0	0	0	0	0	0	0	0	0	0	0	0	0	0	0	0	0	0	0	0	0	0	0	0	0	0	0	0	0	0	0	0	0	0	0	0	0	0	0	0	0
Cdipt	0	0	0	0	0	0	0	0	0	0	0	0	0	0	0	0	40.0134	82.4284	0	0	0	0	19.391	10.6773	0	0	0	0	0	0	0	0	0	0	47.7774	80.7598	0	0	0	0	59.5616	0	23.472	0	0	16.4014	0	24.4767	0
Cdk1	82.4913	0	0	0	63.7591	114.2	152.526	189.716	168.502	210.92	99.397	87.7184	154.748	153.111	142.921	81.7291	114.843	82.9282	204.442	151.231	109.343	163.219	169.223	115.28	684.475	342.341	288.073	239.387	458.79	373.922	223.836	153.296	261.526	234.385	183.535	272.006	342.656	389.772	490.759	366.788	311.47	268.135	288.418	210.733	202.499	279.627	342.506	265.141	0
Cdk10	0	0	0	0	0	0	0	0	0	0	0	0	0	0	0	0	0	0	0	0	0	0	0	0	0	0	0	0	0	5.89144	0	0	0	0	0	0	0	0	0	0	0	0	0	0	0	0	0	0	0
Cdk11b	0	0	0	0	64.6256	100.413	124.601	0	143.784	95.8699	167.376	194.678	39.7191	0	163.297	202.341	223.821	241.627	78.1791	217.293	85.0846	78.947	169.162	165.247	188.145	272.649	131.109	173.905	118.157	167.76	191.235	120.332	145.069	164.016	227.215	238.284	257.383	263.934	224.725	109.377	236.046	204.787	149.844	180.523	139.759	167.299	122.092	141.421	69.5136
Cdk12	0	0	0	0	0	13.9838	0	0	0	0	13.6302	39.1231	139.77	0	219.997	143.884	133.367	70.3486	167.786	181.804	221.011	288.784	32.4002	49.1336	0	150.889	81.1012	56.7687	24.1613	0	157.375	93.0119	277.463	52.3792	76.1079	149.611	235.623	82.2404	0	127.589	63.9774	61.8545	132.356	337.363	267.937	126.331	256.742	97.7801	178.633
Cdk13	0	0	0	0	0	0	0	38.8131	0	0	0	62.7725	88.0426	66.9355	54.1369	67.5212	23.4357	0	71.01	0	109.273	173.158	0	18.4032	308.232	0	82.5352	0	112.061	29.579	147.182	26.494	67.4878	92.1812	34.2766	41.6793	0	157.002	188.162	0	50.9281	105.371	0	136.526	104.324	64.3203	62.7469	48.7873	0
Cdk17	0	0	0	0	86.2983	99.3506	0	0	0	0	48.1949	51.6522	11.2533	0	21.3495	31.3722	63.4322	111.184	0	0	0	78.7784	67.2652	50.8642	0	0	0	0	0	0	31.7951	0	42.1625	0	40.6833	61.6812	0	0	0	0	43.5302	58.2411	0	0	0	0	0	16.022	0
Cdk19	0	0	0	0	0	0	0	0	0	0	0	0	16.1126	0	0	44.3122	0	0	137.968	0	60.4226	229.923	24.9691	46.5799	0	0	0	0	0	0	81.3794	0	0	0	0	0	0	0	0	0	0	0	0	0	0	0	0	0	0
Cdk2	0	0	0	0	0	0	34.134	38.6945	121.583	251.62	36.784	7.7924	65.4488	9.47441	47.3206	147.846	0	16.679	58.7992	36.2734	175.382	92.5999	0	0	108.305	122.319	28.4862	45.4256	69.2418	0	112.992	98.9664	119.934	135.817	0	30.8582	69.1614	139.402	224.381	144.31	33.6154	36.4056	122.419	87.8266	94.6531	103.38	122.138	33.1159	0
Cdk2ap1	0	0	0	0	0	0	0	66.6198	52.5574	0	30.4841	36.2418	0	24.9907	38.6781	15.3884	0	0	0	36.6902	16.8616	0	43.0463	24.5465	0	0	0	0	0	0	0	48.3005	49.0727	48.7077	0	0	0	0	0	0	49.0281	0	75.8063	0	0	37.9646	0	30.8094	0
Cdk2ap2	0	0	0	0	26.9754	0	0	0	0	0	0	0	0	0	0	0	0	26.5804	0	0	0	0	0	0	45.2559	40.4324	33.8746	39.5889	0	0	24.5286	0	0	0	20.6002	22.7389	45.7619	0	0	0	0	21.9171	0	0	0	0	0	0	0
Cdk4	0	0	0	0	0	95.1089	36.9198	79.6652	75.5722	128.986	171.328	115.011	85.8995	26.2107	83.7335	116.37	122.666	134.289	157.403	148.08	197.702	143.52	171.616	130.017	81.635	109.051	241.447	248.341	142.297	200.266	145.731	184.948	281.242	84.9391	207.815	192.25	134.747	183.655	640.352	246.955	165.249	186.038	151.098	144.342	179.19	114.799	145.096	79.3099	0
Cdk5	0	0	0	0	0	0	0	0	0	0	38.3002	19.0675	22.097	0	0	0	34.9219	37.2672	39.9582	0	0	0	33.3983	27.8372	0	0	57.6273	48.1536	0	0	0	227.713	0	0	27.9411	36.6634	0	0	0	0	37.7348	84.1539	0	0	0	0	0	68.8049	0
Cdk5rap1	0	0	0	0	0	0	0	0	0	0	0	0	0	0	0	0	0	0	0	0	0	0	0	0	0	0	0	0	0	0	0	0	0	0	0	0	0	0	0	0	5.64663	0	0	0	0	0	31.5452	3.56217	0
Cdk5rap2	0	0	0	0	0	0	0	0	0	0	0	0	215.009	0	145.822	201.954	47.7786	56.9111	0	0	128.461	0	54.6055	108.679	0	0	0	0	235.65	0	28.2303	0	182.07	0	0	0	0	0	0	0	0	0	0	0	188.596	41.8467	53.4366	99.4725	0
Cdk5rap3	40.7962	98.1997	134.736	0	91.4931	72.8576	48.7526	151.931	67.1831	126.474	93.7827	64.7335	83.109	30.3927	93.7949	72.0835	159.815	105.615	89.6548	78.9206	30.0562	29.0249	135.096	80.0672	0	0	102.063	124.017	54.7395	135.29	75.4275	30.7171	56.3656	23.6544	146.791	86.1049	78.9666	101.097	0	30.9954	126.458	71.1494	77.1075	91.5048	168.978	155.834	91.6866	154.656	221.322
Cdk6	71.8949	0	98.1092	0	107.757	103.498	422.454	477.993	345.807	328.778	276.629	215.541	402.364	485.229	210.711	311.349	272.485	289.736	355.018	487.439	243.601	198.934	306.986	283.939	508.162	460.206	620.396	363.783	453.27	491.619	737.565	521.953	459.656	669.335	467.188	455.909	593.095	713.854	786.44	968.5	392.85	457.555	730.843	568.111	484.778	502.656	1046.59	427.117	253.951
Cdk7	0	0	0	0	0	0	0	0	67.7464	44.4477	22.7215	19.8011	18.5262	0	54.3738	64.5179	14.5834	68.7587	0	0	0	0	0	4.49839	0	0	65.513	51.6242	25.8516	88.4879	68.2115	37.3967	56.8632	14.378	0	13.4203	77.305	46.7647	115.362	0	46.6487	40.8748	36.2265	0	20.8871	39.5948	73.9761	60.4305	0
Cdk8	0	0	0	0	0	0	0	0	0	0	0	0	0	72.7059	0	0	0	0	0	0	0	0	0	0	0	0	0	0	0	0	0	0	0	0	0	0	0	0	0	0	0	0	0	0	0	0	0	0	0
Cdk9	0	0	0	0	9.82093	17.253	30.0197	48.5275	44.1933	70.9007	32.9815	66.1028	26.6301	26.7911	83.2386	74.5326	74.9264	101.903	31.4836	57.5508	92.7687	107.265	115.033	76.0034	112.161	207.105	122.106	139.206	144.154	98.2375	108.193	84.5796	66.4166	93.0505	107.337	105.729	92.2584	226.871	140.626	45.3247	122.492	109.975	97.3193	14.6415	70.0983	81.6373	162.916	40.7716	0
Cdkal1	0	0	0	0	3.72576	0	0	0	0	0	30.7707	0	0	0	42.3883	0	8.15099	10.9909	0	0	0	0	10.6866	15.3982	0	0	6.47579	30.2724	30.9588	0	0	0	26.2865	0	39.4325	16.1684	0	0	0	0	40.1372	28.7431	0	19.2608	29.7607	28.2097	52.5964	27.3949	0
Cdkl1	0	0	0	0	0	0	0	0	0	0	0	0	0	0	0	0	0	0	0	0	0	0	0	0	0	0	0	0	0	0	0	0	0	0	0	0	0	0	0	0	0	0	0	0	0	26.6724	0	0	0
Cdkn1b	11.6229	0	55.0215	0	0	0	0	0	0	0	46.8708	36.6188	23.2311	34.1706	0	0	29.2493	0	62.9501	28.5233	46.5351	78.8807	0	41.4541	0	0	0	0	65.1952	0	28.8512	46.5778	33.2722	12.3104	0	0	0	0	0	0	36.4174	0	0	0	0	14.8483	0	0	20.1437
Cdkn1c	23.9798	0	0	0	104.151	150.39	0	0	0	0	0	48.1957	0	0	34.1934	0	0	27.8273	0	0	0	0	0	0	0	0	0	0	0	0	0	0	0	0	0	0	0	0	0	0	0	0	0	0	0	0	0	0	0
Cdkn2aip	49.4733	69.1658	0	0	167.929	120.97	164.665	67.5081	210.171	137.128	198.952	194.289	98.7299	118.024	127.101	143.406	231.596	187.916	118.165	182.913	194.059	146.766	184.008	170.184	101.302	146.886	178.65	114.333	218.452	204.806	237.688	125.621	283.028	218.241	134.543	213.409	204.543	147.943	18.5453	68.0926	171.25	112.8	40.9493	60.7162	31.5552	85.9014	145.539	72.619	141.861
Cdkn2aipnl	29.4398	0	0	0	44.1209	96.3917	0	0	0	0	19.2975	48.548	36.5584	13.3355	16.2333	6.5051	16.9231	21.1363	0	0	13.7252	0	31.9045	23.8283	0	0	24.4957	25.2079	44.0864	34.3389	0	17.5974	0	16.4171	28.8957	24.9891	0	79.2789	0	0	119.825	18.4072	14.0009	0	8.55746	26.2513	9.29068	36.5548	29.6419
Cdkn2c	18.2293	0	0	0	24.3127	18.9623	34.8518	0	37.7945	32.5931	21.2573	17.0686	18.1242	21.1451	8.60544	11.2746	16.3826	16.2536	8.52271	0	20.7717	14.7619	14.1055	18.3208	0	0	22.4548	31.2415	20.19	25.2538	18.454	0	0	18.3296	27.4068	14.5426	0	0	0	0	18.5391	24.9327	0	0	5.57071	13.6334	0	20.5948	38.682
Cdkn2d	0	0	0	0	0	0	0	0	0	0	0	0	0	0	15.8495	0	0	0	0	0	0	28.2991	0	0	0	0	0	0	0	0	0	0	0	0	0	0	0	0	0	0	0	0	0	0	0	0	0	0	0
Cdpf1	0	0	0	0	0	0	0	0	0	0	0	0	0	0	47.4647	36.1116	0	0	0	0	0	0	0	0	0	0	0	0	0	0	0	0	0	19.7521	0	0	0	0	0	0	0	0	0	0	0	0	0	0	0
Cds2	28.4046	0	0	0	26.3947	0	0	0	0	0	32.2958	0	32.668	80.6086	48.7646	0	5.2772	0	110.781	0	45.7357	31.2517	26.9651	0	7.2637	5.98686	0	0	17.4561	26.0207	27.3389	33.853	66.016	94.4691	4.13135	0	0	8.08975	0	0	0	0	42.7686	0	0	0	79.2642	0	0
Cdt1	0	0	0	0	0	0	0	0	0	0	0	0	0	0	0	0	0	0	0	0	0	0	0	0	0	0	0	0	0	0	87.8479	115.808	0	48.1438	0	0	0	0	0	0	0	0	0	0	0	31.8501	0	83.7215	0
Cdv3	106.02	0	0	0	104.248	108.028	79.3	147.611	86.8978	146.387	142.77	192.692	48.1291	137.011	107.637	107.331	70.2104	48.9308	64.283	64.6448	232.666	275.516	150.813	125.912	648.818	696.712	322.829	445.757	494.155	425.025	165.152	0	259.805	33.6857	232.12	231.772	555.172	327.972	491.572	369.001	268.172	209.753	0	86.3253	126.547	68.2456	100.339	46.7682	29.5174
Cdyl	0	0	0	0	0	0	0	0	0	0	0	0	0	0	0	0	0	0	61.2193	0	8.89134	0	0	0	0	0	0	0	0	0	47.4621	123.277	66.215	64.3751	0	0	0	0	0	91.5434	29.0406	11.0634	48.9959	0	0	24.7905	15.8651	57.3995	0
Ceacam1	0	0	0	0	0	0	0	0	0	0	0	0	0	0	0	0	0	0	0	0	0	0	0	0	0	0	0	0	0	0	0	0	0	0	0	0	0	0	0	0	0	0	0	0	0	0	0	5.27462	0
Cebpa	0	0	0	0	0	0	0	0	0	0	0	0	0	0	0	0	0	0	0	0	0	0	0	0	0	0	0	0	0	0	0	0	0	0	0	7.39201	0	0	0	0	0	0	0	0	3.83564	64.8705	26.7644	26.6042	0
Cebpb	0	0	0	0	0	0	0	0	0	0	0	0	0	0	0	0	0	0	0	0	0	0	0	0	0	0	0	0	0	0	0	0	0	0	0	0	0	0	0	0	0	0	0	85.4716	66.445	72.8269	0	12.7057	0
Cebpd	0	0	0	0	0	0	0	0	0	0	0	0	0	0	0	0	0	0	0	0	0	0	0	0	0	0	0	0	0	0	0	0	0	0	0	0	0	0	0	0	0	0	0	0	0	6.50807	0	9.69238	0
Cebpe	0	0	0	0	0	0	0	0	0	0	0	0	0	0	0	0	0	0	0	0	0	0	0	0	0	0	0	0	0	0	0	0	0	0	0	0	0	0	0	0	0	0	169.005	105.082	160.899	152.094	159.127	169.12	0
Cebpg	0	0	0	0	0	0	0	0	0	0	10.9784	11.3043	10.5928	0	35.567	48.9262	12.3137	18.924	0	0	25.3208	0	18.047	13.1512	0	0	0	0	0	0	0	0	0	0	37.7017	35.3027	0	0	0	0	0	18.0678	0	16.6674	30.507	5.73835	15.1466	18.7727	0
Cebpz	0	0	0	0	100.468	148.785	243.738	0	218.347	0	139.856	117.224	79.1467	18.262	98.7672	151.859	55.4837	121.74	125.425	105.886	205.092	409.549	147.791	84.4164	0	0	206.613	269.909	288.583	229.218	118.668	190.509	105.472	114.834	145.319	99.7586	76.0783	121.234	98.5116	43.8913	176.659	123.608	137.073	58.9938	70.9376	110.805	133.868	125.682	0
Cecr2	0	0	0	0	0	0	0	0	0	0	0	0	0	0	0	0	0	0	0	0	0	0	0	0	0	0	31.94	27.5898	0	0	0	0	0	0	0	0	0	0	0	0	0	0	0	0	0	0	0	0	0
Celf1	0	0	0	0	0	0	0	0	0	0	34.4447	19.1779	56.4902	115.962	0	0	46.7137	38.2352	0	5.68666	0	55.047	39.5458	36.0589	0	0	51.6573	58.3707	0	0	10.0676	27.0285	0	72.3535	49.8948	79.8629	0	0	0	0	61.4678	75.3881	0	0	3.16258	57.6391	0	35.4278	0
Celf2	411.853	690.212	528.668	615.466	62.5492	136.23	407.656	469.021	192.371	225.873	209.824	185.168	671.277	566.342	244.596	295.302	333.42	291.457	167.22	313.618	453.665	111.979	230.529	202.748	593.466	858.608	236.396	213.704	94.8637	162.145	188.644	160.674	271.486	288.973	296.243	386.952	98.5444	72.8898	86.579	145.115	150.531	191.38	248.892	228.269	341.695	261.617	335.521	352.826	293.25
Celsr2	0	0	0	0	0	0	0	0	0	67.4909	0	0	0	0	0	0	0	0	0	0	0	0	0	0	0	0	0	0	0	0	0	0	0	0	0	0	0	0	0	0	0	0	0	0	0	0	0	0	0
Cenpa	0	0	0	0	0	0	0	0	0	0	0	0	0	0	0	0	0	0	0	0	0	0	0	0	0	0	0	0	0	0	0	0	0	0	0	0	0	0	0	0	6.66923	0	0	0	0	0	0	0	0
Cenpc1	0	0	0	0	0	87.8109	0	0	0	0	50.3897	29.0842	31.9187	0	101.147	108.033	46.7592	41.0927	0	0	160.98	139.716	68.5443	52.4703	0	0	66.1434	44.5846	63.0304	65.135	52.8888	0	173.708	71.6371	10.7746	50.4775	0	0	0	0	123.638	73.1996	0	0	0	0	111.272	33.4362	0
Cenpe	0	0	0	0	0	0	0	0	0	0	0	193.016	0	0	0	0	0	0	0	0	0	0	0	0	0	0	0	175.105	0	0	564.791	0	0	0	0	0	0	0	0	0	95.1873	51.6677	0	0	0	821.706	913.309	78.5966	0
Cenpf	0	0	0	0	0	0	0	0	0	0	0	0	0	0	0	0	0	0	0	0	0	0	0	0	0	0	143.232	0	0	0	206.876	0	0	0	0	0	0	0	0	0	0	61.1327	0	0	0	0	0	37.3085	0
Cenph	0	0	0	0	0	0	0	0	0	0	0	0	0	0	52.3628	29.2461	0	0	0	0	0	0	0	0	0	0	0	0	0	0	29.2503	62.9535	0	17.4976	0	0	0	0	0	0	0	0	66.6046	0	0	0	0	20.7182	0
Cenpi	0	0	0	0	0	0	0	0	0	0	0	0	0	27.3024	0	0	0	0	0	0	0	0	0	0	0	0	0	0	0	0	0	0	0	0	75.7378	0	0	0	0	0	0	0	0	0	0	0	0	0	0
Cenpj	0	0	0	0	0	0	0	0	0	0	0	0	95.0352	0	0	0	0	0	0	0	0	0	0	0	0	0	0	0	0	0	0	0	0	0	0	0	0	0	0	0	0	0	0	0	0	0	0	18.3633	0
Cenpk	0	0	0	0	0	0	0	0	0	0	0	0	0	0	0	0	0	0	0	0	0	0	0	0	0	0	53.1249	109.609	0	0	0	0	0	0	0	2.38639	0	0	0	0	58.4753	41.0911	0	0	0	15.207	0	0	0
Cenpn	0	0	0	0	0	0	0	0	0	0	0	0	0	0	67.3122	24.6105	0	0	0	0	0	0	0	0	0	0	0	0	0	0	0	0	0	0	0	0	0	0	0	0	0	0	0	0	11.3438	0	0	0	0
Cenpp	0	0	0	0	0	0	0	0	0	0	0	0	0	0	0	0	0	0	0	0	9.80782	0	15.9629	0	0	0	0	0	0	0	0	0	0	0	0	0	0	0	0	0	37.0014	27.8526	0	0	0	12.9561	0	31.9319	0
Cenpq	0	0	0	0	0	0	0	0	0	0	0	0	8.67339	21.1991	33.9909	46.2367	16.5735	12.8275	23.9155	0	57.8297	34.3957	0	16.3367	0	0	0	72.0999	0	0	88.2135	64.358	139.153	100.932	27.7956	23.1074	37.4313	61.2974	12.7103	52.9323	24.9802	29.9736	0	0	30.807	37.8498	152.082	64.561	0
Cenpt	0	0	0	0	0	0	0	0	0	0	8.69512	0	0	0	14.946	10.775	0	0	0	0	21.9436	45.9247	0	15.8897	0	0	0	0	0	0	0	0	16.8793	0	0	0	0	0	0	0	0	4.31272	0	0	0	0	0	0	0
Cenpu	0	0	0	0	0	0	0	0	0	0	0	0	0	0	0	0	7.51007	0	0	0	0	0	0	0	0	0	0	0	0	0	46.2659	0	0	0	0	0	0	0	0	0	4.69058	0	82.0004	0	0	41.1089	0	72.7193	0
Cenpv	88.9751	114.205	166.752	164.738	173.734	88.2178	82.0944	28.688	114.374	137.82	123.779	117.937	31.744	11.1392	59.9624	81.1782	65.8756	47.7123	18.1122	66.1769	37.705	101.766	47.7249	67.4208	0	0	28.7507	30.7488	71.8802	90.9764	66.2234	64.2773	26.1341	35.7561	92.021	103.051	138.791	120.837	173.768	72.8865	174.54	187.636	35.5671	56.8282	50.7012	69.1017	53.5338	41.9618	188.847
Cep104	0	0	0	0	0	0	0	0	0	0	0	0	0	0	0	0	0	0	0	0	0	0	0	0	0	0	0	0	0	0	0	0	0	0	0	0	0	0	0	0	0	0	0	0	0	33.5124	0	0	0
Cep112	0	0	168.418	0	0	0	0	0	0	0	0	0	0	0	0	0	0	0	0	0	0	0	0	0	0	0	0	0	0	0	0	0	0	0	0	0	0	0	0	0	0	0	0	0	0	0	0	0	0
Cep120	0	0	0	0	0	0	0	0	0	0	0	0	0	0	0	0	0	0	0	0	0	0	0	0	0	0	0	0	0	0	0	0	0	0	0	0	0	0	0	0	0	0	0	611.262	573.383	0	0	0	0
Cep128	0	0	0	0	0	0	0	0	0	0	0	0	24.6205	0	48.2391	30.9402	0	33.4824	0	0	95.5082	102.892	47.5798	28.9527	0	0	0	0	0	0	48.7897	0	0	0	0	18.8777	0	0	0	0	0	0	0	0	0	26.5944	130.879	52.2586	0
Cep131	0	0	0	0	0	0	0	0	0	0	0	29.4257	38.0255	0	62.1042	193.417	19.3238	23.3598	55.3128	40.5827	120.845	174.156	79.1784	13.4418	0	0	34.5982	12.482	110.65	80.9519	85.9694	109.531	128.315	74.0291	25.127	100.607	0	127.059	118.378	140.42	72.058	51.9308	191.219	102.225	181.988	66.4727	272.714	109.491	0
Cep135	0	0	0	0	0	0	0	0	0	0	0	44.7739	0	0	72.1757	46.4492	0	40.7561	0	0	212.709	230.772	47.2392	11.2407	0	0	0	0	0	0	0	0	0	0	0	0	0	0	0	0	0	0	0	0	0	0	45.2655	0	0
Cep152	0	0	0	0	0	0	0	0	0	0	0	0	0	0	0	0	0	0	0	0	0	0	0	55.2353	0	0	0	0	0	0	0	0	0	0	0	43.9217	0	0	0	0	0	0	0	0	0	0	0	0	0
Cep162	0	0	0	0	0	0	0	0	0	0	0	0	0	0	139.969	0	0	0	0	0	113.54	0	0	0	0	0	0	0	0	0	0	0	0	0	0	0	0	0	0	0	0	0	0	0	0	0	0	0	0
Cep170	0	0	0	0	0	0	0	0	0	0	43.4571	222.392	35.5148	0	187.066	367.749	66.345	80.2805	233.405	0	0	228.203	22.663	0	0	0	0	0	27.5753	0	164.894	108.396	134.37	211.345	65.9744	47.5044	0	0	0	0	0	0	114.577	216.515	193.083	103.507	142.079	89.9198	0
Cep170b	0	0	0	0	90.6287	0	0	0	0	0	0	0	0	0	0	0	0	0	0	0	0	0	0	0	0	0	31.5532	0	0	123.279	0	0	0	0	0	0	0	146.095	0	0	0	0	0	0	0	0	0	0	0
Cep192	0	0	0	0	0	0	0	0	0	0	0	0	0	0	0	0	0	0	0	0	0	0	0	0	0	0	0	0	0	0	0	0	0	0	0	0	0	0	0	351.999	0	0	0	0	0	0	0	159.734	0
Cep250	0	0	0	0	0	0	0	0	0	0	40.7541	83.3759	72.3498	0	165.97	0	136.42	0	0	0	277.591	258.747	0	129.408	0	0	0	0	0	0	0	0	134.848	0	0	0	0	0	0	0	0	0	414.546	0	153.343	47.9644	154.037	58.8127	0
Cep290	0	0	0	0	0	0	0	0	0	0	0	0	0	0	0	0	231.691	0	279.988	0	0	0	0	0	0	0	0	0	0	0	193.049	96.1875	0	0	0	0	400.473	243.681	0	0	0	0	223.235	0	0	0	325.03	0	0
Cep350	0	0	0	0	0	0	0	0	0	0	0	0	55.6202	0	0	0	0	0	0	0	225.407	484.205	0	0	0	0	0	0	0	0	123.485	0	0	0	0	0	0	0	0	0	0	0	83.9918	0	273.954	222.546	274.56	140.641	0
Cep41	0	0	0	0	0	0	0	0	90.2375	77.3751	27.8428	23.0598	0	0	26.3361	24.9796	33.9593	44.5265	62.5345	0	55.2844	46.9557	45.9625	77.682	116.355	26.2865	0	0	0	0	20.7608	126.671	47.4232	62.3307	26.4643	0	62.6937	0	104.654	0	16.2283	39.4311	0	0	43.2037	0	48.5398	0	0
Cep44	0	0	0	0	0	0	0	0	0	0	0	0	0	0	0	0	0	0	0	0	0	0	0	0	0	0	0	0	0	0	0	0	0	0	0	0	0	0	0	0	0	0	33.0376	0	0	0	34.3992	0	0
Cep55	0	0	0	0	0	0	0	0	0	0	0	0	14.8944	0	78.5393	94.5778	0	0	0	0	102.52	90.5095	35.5536	0	73.2495	70.0399	27.6522	42.7512	80.6413	0	61.4747	53.9757	118.608	0	82.9251	47.1072	0	0	0	0	0	0	58.0132	88.6481	52.8258	0	112.656	158.795	0
Cep57	0	0	0	0	0	109.491	0	0	0	0	0	6.761	0	0	50.6222	0	0	0	0	0	22.8728	62.7673	0	0	0	0	0	0	0	0	0	0	0	0	0	0	0	0	0	0	0	0	0	0	0	0	0	0	0
Cep63	0	0	0	0	0	0	0	0	0	0	0	0	0	0	0	0	0	0	0	0	94.1982	0	0	0	0	0	0	0	0	0	0	0	0	0	0	0	0	0	0	0	0	0	0	0	71.0684	0	0	0	0
Cep68	0	0	0	0	0	60.4879	0	0	28.2289	0	39.0541	56.055	6.00182	0	75.8099	103.362	65.9878	67.9571	58.9971	0	66.8128	99.772	27.49	25.0404	0	0	0	0	49.435	47.7279	96.4541	80.1901	0	0	0	0	0	0	0	0	30.2246	19.6501	0	0	0	0	0	0	0
Cep70	0	0	0	0	0	0	57.7955	0	0	0	0	0	0	0	0	54.6474	0	0	0	66.4678	0	0	0	0	0	0	0	0	0	0	0	0	0	0	0	0	0	0	0	0	0	0	0	0	0	0	0	0	0
Cep72	0	0	0	0	0	0	0	0	0	0	0	0	0	0	0	0	0	0	0	0	0	0	0	0	0	0	0	0	0	0	0	0	0	0	0	0	0	0	0	0	0	0	0	0	0	25.8723	49.3508	38.3601	0
Cep76	0	0	0	0	0	0	0	0	0	0	0	0	0	0	0	0	0	12.9647	0	0	0	0	0	0	0	0	0	0	0	0	0	0	0	0	0	0	0	0	0	0	4.13975	16.002	0	0	37.9664	0	0	30.8854	0
Cep78	0	0	0	0	0	0	0	0	0	0	0	0	0	0	0	0	0	0	22.4766	0	0	0	0	0	0	0	0	0	0	0	0	0	0	0	0	0	0	0	0	0	0	0	0	0	124.092	0	0	25.3805	0
Cep85	0	0	0	0	0	0	0	0	0	0	0	0	0	0	0	0	0	0	0	0	0	0	0	6.57421	0	0	13.8751	0	0	0	0	0	0	0	0	0	0	0	0	0	36.5529	55.7607	0	0	0	0	0	0	0
Cep95	0	0	0	0	0	0	0	0	0	0	0	0	0	0	0	0	0	0	0	0	0	0	0	0	0	0	0	0	0	0	0	0	0	0	0	64.4795	0	0	0	0	0	0	0	0	0	0	0	0	0
Cep97	0	0	0	0	0	0	0	0	0	0	0	94.1694	23.8419	4.57635	96.7104	0	34.9848	27.1023	52.5778	0	88.3963	188.737	16.4699	32.7226	0	0	75.4482	68.7897	0	25.5312	73.7836	27.0604	75.8999	25.5194	16.5211	23.6701	0	0	0	0	14.7823	35.9752	0	30.3078	86.3845	29.7349	90.8648	77.1128	0
Cept1	0	0	0	0	0	0	0	0	0	0	0	0	0	0	0	0	0	0	0	0	0	0	0	0	0	0	0	0	0	0	0	0	0	0	0	0	0	0	0	0	0	0	0	0	0	0	0	6.67105	0
Cers2	0	0	0	0	173.851	119.103	230.67	161.943	157.015	175.317	69.0433	59.4475	28.4878	38.0521	71.9366	82.3331	45.7016	61.1539	74.7984	27.9224	73.4483	62.5766	31.3089	37.4053	0	0	89.5862	89.3027	74.9629	103.056	78.7155	32.9455	38.5057	87.917	72.5799	74.2194	323.116	292.627	142.982	218.478	94.5631	125.164	78.2894	49.2182	20.8946	57.7492	79.0801	47.4237	84.5196
Cers5	0	0	0	0	0	0	0	0	0	0	0	0	0	0	0	0	0	0	0	0	0	0	0	0	0	0	0	0	0	0	0	0	0	0	0	0	0	0	0	0	0	0	0	0	0	0	0	0	0
Cert	0	0	0	0	274.955	0	0	0	0	0	101.774	39.2753	79.3939	31.4541	39.5246	53.728	67.9171	48.6789	219.742	418.002	66.0465	0	36.4655	78.5017	0	0	0	0	0	0	126.778	86.4913	61.2026	53.9325	0	16.4576	0	0	0	0	0	0	140.406	91.8314	201.993	116.68	231.125	20.0526	60.9943
Ces1c	142.089	0	0	0	0	0	0	0	0	0	0	0	0	0	0	0	0	0	0	0	0	0	0	0	0	0	0	0	0	0	0	0	0	0	0	0	0	0	0	0	0	0	0	0	0	0	0	0	0
Ces2a	0	0	0	0	0	0	0	0	0	0	0	0	0	0	0	0	0	0	0	0	0	0	0	0	0	0	0	0	0	0	0	28.9583	0	0	0	0	0	0	0	0	0	0	0	0	0	0	0	0	0
Ces2e	0	0	0	0	0	0	0	0	0	0	0	29.1983	0	0	0	0	0	0	0	0	0	0	0	0	0	0	0	0	0	0	0	0	0	0	0	0	0	0	0	0	0	0	0	0	0	0	0	0	0
Ces2g	182.375	0	0	0	87.4761	72.0659	0	0	0	0	62.0248	0	0	0	0	0	37.872	35.9647	0	0	0	0	0	0	0	0	0	0	0	0	109.718	187.335	110.171	133.453	48.5003	80.0285	619.863	418.305	676.992	376.05	947.551	1047.96	0	0	0	0	0	0	125.087
Cetn2	89.6888	0	0	0	107.269	75.8419	0	0	173.595	116.804	173.855	140.592	19.7627	9.96744	132.29	100.805	94.3129	86.5758	178.911	89.2576	169.942	144.444	153.573	168.34	105.74	79.0542	96.1748	69.8737	56.2536	73.9169	75.6787	57.6126	66.1272	41.6816	69.5602	109.828	0	0	67.0064	93.7835	103.36	110.939	45.4882	55.5655	76.4178	76.9898	180.397	140.201	83.8261
Cetn3	0	0	0	0	41.1878	0	0	132.837	111.529	65.9703	51.3285	38.3162	9.75379	53.6374	82.7973	29.1287	38.311	24.0749	90.5671	0	44.046	66.5871	56.4248	36.0056	106.241	41.9337	24.8022	20.571	0	0	84.3004	83.4935	23.3379	77.6533	31.5747	42.8647	151.53	141.813	0	78.3301	42.3872	31.0894	56.6691	35.6155	17.7254	39.6989	16.269	57.231	0
Cfap20	0	0	0	0	0	0	0	0	0	0	33.1772	19.7606	8.42745	0	13.5367	0	0	21.5369	0	0	0	0	29.395	35.9892	0	0	0	0	0	0	50.1539	33.9711	155.456	73.8983	0	0	0	0	0	0	0	0	0	0	10.1573	0	0	24.0021	0
Cfap36	59.0265	44.9921	0	0	0	44.4303	148.833	43.4773	41.9628	16.378	35.2553	0	29.6452	52.9127	43.9456	42.6734	42.3918	72.9481	56.3737	36.8118	55.6855	51.7364	39.2259	100.394	44.6013	0	22.6094	0	0	0	26.3618	24.2237	35.153	30.4853	0	0	0	0	0	34.6321	17.3313	33.9341	47.5935	11.0459	63.2614	71.6747	99.2689	26.7109	0
Cfap43	0	0	0	0	0	0	0	0	0	0	0	0	231.818	156.695	0	0	0	0	0	0	0	0	0	0	0	0	0	0	0	0	0	0	0	0	0	0	0	0	0	0	0	0	0	0	0	0	0	0	0
Cfap44	0	0	0	0	0	0	0	0	0	0	0	0	0	0	0	0	0	0	0	0	0	0	0	0	0	0	0	0	0	0	0	0	0	0	0	0	0	0	0	0	0	0	217.63	0	0	0	0	0	0
Cfap97	0	0	0	0	0	0	0	0	0	0	0	0	0	0	0	0	0	0	0	0	0	0	0	0	0	0	0	0	0	0	0	0	42.0265	0	0	7.29974	0	0	0	0	23.4744	0	0	0	0	0	0	0	0
Cfap99	0	0	0	0	0	0	0	0	0	0	0	0	0	0	0	0	0	54.3894	0	0	0	0	0	22.8816	0	0	29.7294	0	0	0	0	0	0	0	0	0	0	0	0	0	23.7204	45.6286	0	0	0	0	0	53.0634	0
Cfb	0	0	0	0	36.1254	0	0	0	0	0	0	0	0	0	33.8885	0	0	0	0	0	0	0	0	0	0	0	0	59.2867	0	0	0	0	0	0	0	0	0	0	0	0	0	0	0	0	0	0	0	0	0
Cfdp1	314.87	73.8142	62.9354	352.476	70.2402	81.5075	105.861	217.194	346.237	285.863	158.493	132.5	77.3451	117.907	161.363	179.016	104.116	89.8188	135.111	173.566	152.37	364.57	149.09	132.234	159.709	245.943	137.155	121.573	117.012	126.884	275.084	208.205	361.248	266.013	157.511	128.152	263.584	402.12	305.182	268.082	135.628	173.481	79.4659	37.5932	58.7297	124.707	216.357	72.257	284.799
Cfl1	5942.04	4172.74	4046.73	3809.48	3837.42	3606.8	2938.54	4132.61	3895.7	3994.68	2873.83	2743.86	5552.85	4382.04	2841.07	2543.91	3440.98	2644.53	3019.74	3919.81	2876.75	3975.94	3925.65	2959.95	5024.66	4810.76	3889.9	3697.97	3137.49	3743.99	2604.16	3031.12	3994.53	3645.15	3134.91	2668.3	2744.72	2940.25	3964.93	2848.49	2222.35	2198.12	2962.66	4086.78	3865.53	4162.27	3862.92	2772.05	3842.28
Cfl2	114.043	118.432	214.28	0	75.466	63.3154	57.7373	0	38.8501	3.26322	15.4814	36.8627	60.5049	35.2331	28.7597	27.5413	23.1262	32.5455	0	62.1637	87.288	0	23.5622	31.6777	142.515	90.9033	30.118	19.2705	35.2065	108.438	87.0257	0	60.7416	0	0	0	14.5168	47.8394	0	64.7031	0	6.67216	0	59.6152	96.9423	46.751	0	6.96729	49.1872
Cggbp1	68.3763	151.028	0	397.228	134.453	106.777	204.75	189.935	219.518	115.943	137.694	115.051	115.24	113.621	147.954	149.296	162.032	138.507	157.286	114.885	167.461	129.541	180.571	130.497	235.462	204.957	89.5929	101.02	169.812	29.4827	153.613	115.795	121.501	163.585	146.081	147.298	94.2892	170.404	139.148	113.752	100.656	126.736	109.176	90.2388	103.175	70.9966	35.4756	61.2802	0
Cgn	0	0	0	0	0	0	0	0	0	0	0	0	0	0	72.3378	0	0	0	0	0	0	0	0	0	0	0	0	0	0	0	0	0	0	0	0	0	0	0	0	0	0	0	0	0	0	0	0	0	0
Chaf1a	0	0	0	0	0	0	84.5115	115.947	99.2011	230.778	51.8335	77.6483	24.6873	41.2492	67.4077	45.9146	12.315	20.5031	238.966	85.3039	62.1135	162.802	28.8789	45.7672	49.595	191.789	69.5114	109.373	0	0	46.5703	72.8779	40.7002	128.021	66.2379	151.987	107.429	167.287	65.7295	81.9475	53.8041	99.3384	146.102	96.6135	73.3701	89.9803	44.3671	112.048	0
Chaf1b	0	0	0	0	0	0	0	0	0	0	36.6274	30.1935	27.0458	17.3913	35.3529	30.9669	0	0	0	0	108.557	123.271	0	23.6448	77.8155	172.116	74.368	63.8198	72.0466	68.8229	71.2867	53.8257	115.577	70.7904	13.3716	94.8445	111.394	0	0	0	52.8524	5.05093	52.2055	107.082	112.562	54.9654	96.0941	62.8938	0
Champ1	188.362	0	0	0	106.175	101.937	96.8652	104.341	93.0489	164.757	59.4383	84.3662	53.7507	47.3608	129.844	49.872	118.937	110.682	45.3109	142.706	79.0084	206.919	107.864	98.5396	140.679	162.535	52.584	84.1364	218.301	41.4601	108.917	129.286	204.176	174.322	79.8064	54.6099	91.602	49.6207	259.161	175.451	68.1268	135.657	113.46	133.358	128.319	121.617	76.7243	48.3155	168.803
Chchd1	0	0	42.0725	0	0	0	25.2647	61.6641	31.3495	111.97	0	13.7505	34.5771	37.4623	26.8483	10.8015	11.0231	26.659	17.735	49.9653	11.9115	71.6716	14.1501	14.9671	46.8881	18.3866	0	0	0	0	15.4501	39.6701	32.4627	22.098	21.0126	28.7315	61.2589	34.5924	121.379	54.4248	12.7348	14.353	15.8717	10.4703	39.7895	12.2507	25.868	5.69293	65.043
Chchd2	0	0	0	0	0	0	0	0	0	0	0	0	0	0	0	0	10.0627	10.858	0	0	0	0	0	0	0	0	68.5303	38.6679	0	0	0	0	0	0	0	0	0	0	0	0	0	0	0	0	0	0	0	0	0
Chchd3	82.0133	139.138	188.862	300.587	149.586	241.352	299.994	211.509	162.778	215.054	103.98	58.5019	63.9233	76.6125	92.3293	86.4569	88.7014	53.0677	176.524	141.602	93.1729	42.7104	122.344	99.8495	271.487	236.34	85.7528	83.2876	112.072	205.667	124.025	82.8317	216.984	76.6876	142.724	115.215	271.385	284.747	165.648	233.884	192.182	167.832	115.214	91.2382	132.404	71.1614	71.0169	81.8989	114.708
Chchd4	0	0	303.146	0	0	0	0	0	0	0	12.7728	0	0	0	47.4901	24.6592	0	0	52.3029	0	42.6905	68.4528	0	0	0	24.4251	0	0	0	0	19.7748	68.7565	0	17.6833	0	0	0	62.0792	0	0	10.2667	0	0	8.91002	8.42878	0	0	0	27.0532
Chchd6	51.9546	364.793	191.206	414.818	51.3597	68.6618	178.063	103.792	156.045	72.7384	37.1982	53.018	48.7377	70.5702	42.5333	62.9249	71.8138	63.4267	82.137	32.8916	86.1637	46.3599	12.4305	27.8483	154.731	171.756	23.3988	28.164	79.9338	60.015	40.4648	57.1944	33.9663	23.9632	0	38.4972	198.057	195.427	0	114.018	54.0913	50.8109	28.7175	66.585	75.2529	52.8129	79.1256	46.946	130.755
Chd1	140.214	0	0	0	0	0	0	0	0	0	105.469	30.8079	64.5135	21.6256	156.616	197.217	0	50.9464	0	0	224.702	269.051	66.9707	63.9938	0	0	78.8897	95.6869	0	0	210.47	93.3073	0	111.324	56.5553	80.2041	0	0	0	0	117.757	117.733	111.589	156.741	138.461	121.97	124.69	151.896	0
Chd1l	0	0	0	0	0	0	0	0	0	0	42.4849	36.9441	35.8524	9.22222	81.5444	48.99	134.981	105.76	202.984	0	28.4085	100.974	62.8694	58.8902	0	0	0	23.0277	43.2921	50.6144	93.8012	172.807	106.034	174.359	34.804	46.1234	136.428	52.1714	227.031	0	147.094	148.228	187.731	0	65.3282	9.97382	50.6558	87.0273	0
Chd2	0	0	0	0	0	0	0	0	0	0	0	85.0394	56.9169	18.1432	249.158	118.445	43.8214	44.4803	121.491	0	274.455	188.239	81.039	89.8185	0	0	0	0	0	0	84.5175	43.5768	0	59.8277	0	0	0	0	0	0	0	0	0	0	0	65.6269	0	0	0
Chd3	0	0	0	0	0	0	0	0	194.632	0	0	6.40452	32.8517	45.9548	275.403	245.926	0	71.5281	320.834	268.507	355.715	544.622	51.1385	56.4038	0	0	0	0	200.832	115.37	187.135	183.75	132.902	131.373	0	0	43.4198	0	0	0	0	0	0	492.301	144.369	104.639	151.912	0	0
Chd4	108.26	709.413	1074.3	736.299	680.822	421.608	1084.42	1257.46	907.178	903.584	973.353	1167.25	441.708	412.418	714.563	805.601	926.987	974.776	907.535	1206.93	1412.54	1158.07	1202.37	1047.75	1033.22	914.293	919.076	905.642	801.718	899.053	822.784	1168.05	941.171	1141.05	1392.51	1336.85	848.487	966.23	785.369	1007.42	1350.69	1224.15	984.157	814.807	807.574	906.914	814.23	1013.29	533.942
Chd5	0	0	0	0	0	0	0	0	0	0	0	0	0	0	0	0	0	0	0	0	187.34	0	0	4.06123	0	0	0	0	0	0	0	0	0	0	0	0	0	0	0	0	0	0	0	0	0	107.897	0	0	0
Chd6	0	0	0	0	0	0	0	0	0	0	0	0	0	0	0	0	0	0	0	0	0	0	0	0	0	0	0	0	0	0	160.361	165.722	0	0	0	0	0	0	0	0	0	0	0	0	0	0	0	0	0
Chd7	0	0	0	0	0	0	370.115	0	0	0	0	0	0	0	188.489	0	0	0	0	0	0	0	0	0	0	0	0	0	0	0	0	0	0	0	0	0	0	0	0	0	0	0	0	0	0	121.478	0	233.176	0
Chd8	0	0	0	0	0	0	0	0	0	170.949	0	0	0	0	199.363	311.616	239.533	75.8709	95.5518	0	325.185	363.77	20.0169	123.937	0	0	129.984	0	34.502	30.5256	350.121	205.763	102.57	294.504	87.1354	87.1986	0	0	0	104.187	130.707	148.709	246.136	226.802	174.079	116.247	226.761	52.4716	0
Chd9	0	0	0	0	0	0	0	0	0	0	0	0	0	0	0	0	0	0	0	0	0	0	0	0	0	0	0	0	0	285.349	0	0	0	0	0	0	0	0	0	0	0	0	0	0	0	0	278.193	0	0
Chdh	0	0	0	0	0	0	0	0	0	0	0	0	71.5544	0	40.1187	9.64913	37.9487	0	90.4962	104.068	51.5768	95.7194	80.3849	76.687	151.025	313.365	180.502	255.255	250.286	189.134	73.302	73.1031	75.6158	42.6497	139.158	146.47	0	0	0	0	0	0	376.019	271.137	213.602	399.631	158.064	302.16	0
Chek1	0	0	0	0	0	0	0	0	0	0	34.799	27.2647	34.3069	0	46.4356	0	25.9254	30.9383	47.1642	28.4439	0	0	82.9524	41.9669	0	0	216.252	174.09	129.584	48.8796	80.9738	66.1472	45.5223	55.3294	54.5362	89.8051	55.6454	40.1919	0	0	72.0048	46.0668	80.7022	152.387	62.2525	71.7304	80.0501	67.7863	0
Chek2	0	0	0	0	0	0	0	0	0	0	0	17.5493	0	0	0	0	0	20.3721	0	0	0	0	4.21158	0	0	0	40.6989	47.1776	22.6411	0	17.1225	31.7096	0	55.0699	0	0	0	0	0	0	0	29.0235	0	0	0	0	103.115	0	113.064
Cherp	170.439	647.338	583.236	0	227.03	257.924	267.77	306.155	139.137	307.872	294.426	348.572	305.398	140.492	264.768	263.378	295.821	230.811	191.012	146.418	197.39	222.822	411.342	338.386	575.404	130.763	256.473	162.663	298.646	336.849	212.124	152.553	95.6889	168.449	338.634	269.673	159.635	174.856	148.918	127.949	296.765	263.444	228.151	139.655	144.326	147.511	35.1954	216.502	190.533
Chfr	0	0	0	0	0	0	0	0	0	0	0	0	0	0	28.1412	25.5912	0	0	0	0	25.561	0	0	0	0	0	0	0	0	0	0	0	0	0	0	0	0	0	0	0	0	0	0	37.9936	64.9078	28.821	43.3565	0	0
Chga	48.6303	0	0	382.185	0	0	0	0	0	0	0	0	0	0	154.375	0	0	0	0	0	0	0	0	0	491.183	198.552	0	0	0	0	0	0	0	0	0	0	0	0	0	0	0	0	0	0	0	0	0	0	0
Chic2	0	0	0	0	0	0	0	0	0	0	17.2208	0	0	0	0	0	15.4281	0	0	0	0	0	0	0	0	0	0	0	0	0	0	0	0	0	12.957	0	0	0	0	0	0	0	0	0	0	0	0	0	0
Chid1	0	0	0	0	0	0	0	0	0	0	0	0	0	0	0	0	11.977	27.9726	0	0	0	0	13.6388	0	0	0	0	0	0	0	0	0	0	0	15.3452	0	0	0	0	0	7.73023	17.3036	0	0	0	0	0	11.5406	0
Chil3	97.9481	0	0	0	148.727	153.871	0	0	102.148	23.3395	160.395	227.415	16.2217	117.385	17.6324	39.0706	120.505	185.407	0	124.328	105.892	51.0994	297.228	247.695	140.584	121.786	607.146	652.23	904.049	826.221	0	0	56.9053	0	82.7861	111.075	0	0	0	0	43.0416	47.8715	0	80.7255	73.5581	70.2196	26.8758	132.071	0
Chil4	0	0	0	0	0	0	0	0	0	0	0	0	0	0	0	0	0	0	0	0	0	0	0	0	0	0	0	0	54.2797	0	0	0	0	0	0	0	0	0	0	0	0	0	0	0	0	0	0	0	0
Chkb	0	0	0	0	0	0	0	0	0	0	0	0	29.3601	0	39.2374	0	22.6409	21.4485	0	0	0	0	0	9.57986	0	0	0	0	0	0	0	25.0638	0	0	0	0	0	0	0	0	0	0	0	25.1965	13.6789	13.1447	0	18.8119	0
Chm	0	0	0	0	0	0	0	0	31.2763	0	0	0	0	0	67.851	20.2525	0	0	0	0	45.9682	0	0	0	0	0	0	0	0	0	25.4974	52.1072	705.518	32.9103	0	0	0	0	0	0	0	0	0	0	34.7106	37.2577	19.7209	23.8321	0
Chmp1a	0	0	0	0	112.925	85.3056	0	0	0	0	0	4.33232	0	0	0	0	64.4726	0	0	12.5242	0	0	42.5685	34.3355	0	0	0	0	0	0	0	0	0	0	0	0	0	0	0	0	45.9528	44.0181	0	0	0	31.3047	0	0	0
Chmp1b	0	0	0	0	34.9094	0	0	0	0	0	0	16.5454	0	0	0	0	0	0	0	0	0	0	0	0	0	0	0	0	0	0	0	0	0	0	0	0	0	0	0	0	0	0	0	0	0	0	0	0	0
Chmp2a	0	0	0	0	0	0	0	0	68.4897	33.8296	0	0	0	0	15.4028	37.4213	0	0	59.7289	0	37.4498	43.7607	0	0	63.8778	34.0983	0	0	0	0	63.7145	21.9714	19.4107	32.0293	0	28.6076	45.3597	66.6316	61.7213	26.7536	0	0	0	0	45.7471	0	78.6615	0	0
Chmp2b	0	0	0	0	0	0	69.4475	0	0	27.3183	11.6569	11.6348	0	23.0181	0	0	0	19.2802	0	0	0	0	15.8716	13.8529	57.9111	34.1414	0	0	0	0	0	0	27.8647	0	26.1065	14.0123	0	0	0	40.179	13.687	0	0	0	0	0	0	8.18204	0
Chmp3	0	0	0	0	0	29.6997	0	0	44.0084	52.5685	22.0116	16.3019	14.9005	0	0	0	19.1639	26.9431	0	17.9894	0	0	18.9453	31.8737	0	0	29.1351	30.4135	24.0423	51.7333	0	20.3858	37.1586	0	6.05707	0	0	0	92.7068	60.8661	20.094	34.8417	42.0339	0	0	27.4918	0	13.1572	51.0726
Chmp4b	404.849	134.073	214.866	263.814	195.6	274.739	182.272	98.8801	199.469	181.3	170.161	235.989	194.21	400.786	179.717	209.898	111.046	198.102	80.2322	120.098	290.398	39.7357	179.535	199.615	408.166	613.642	237.339	221.976	395.684	347.743	222.489	139.994	318.994	183.108	183.796	329.866	274.514	244.628	665.653	564.308	218.923	161.618	122.196	290.061	237.723	213.367	228.945	160.221	289.1
Chmp5	0	0	0	0	22.8641	51.2113	0	0	0	0	14.445	54.1379	91.1897	58.941	0	0	56.4189	85.3023	104.276	0	120.116	108.424	55.0281	61.7628	47.4052	66.5886	98.3397	67.2168	27.1615	94.9561	49.7254	90.4474	0	47.8366	79.6979	45.5791	65.0465	0	0	0	60.0727	74.6794	32.0788	81.8131	55.0503	59.5793	0	78.2913	62.8416
Chmp6	0	82.8971	70.362	68.0551	0	0	37.1045	61.8233	22.1216	26.3001	26.5741	37.082	18.9226	21.9987	41.2218	21.3858	40.3073	37.9204	23.6186	26.0391	50.2611	55.1095	23.9382	20.7776	31.3551	52.5324	0	0	0	0	31.1672	51.5251	40.5678	37.7083	58.3807	59.1742	30.6945	60.3466	159.14	181.637	29.175	41.0771	46.1054	29.5861	18.5162	32.489	18.5818	53.4161	84.773
Chmp7	0	0	0	0	0	0	0	0	0	0	0	0	0	0	20.4627	17.3231	0	0	0	37.3953	0	0	0	0	23.476	0	0	0	0	0	0	99.9968	69.7475	56.1532	0	0	0	0	36.0981	0	0	0	83.469	51.9455	58.895	123.498	69.3236	0	0
Chordc1	158.165	1219.54	2286.44	0	207.826	175.093	355.598	505.031	537.283	308.177	293.456	278.295	128.626	74.6774	391.824	351.489	175.214	206.687	207.876	382.085	338.773	254.746	298.137	282.978	600.529	519.504	331.64	301.593	263.027	246.848	222.998	207.021	322.515	292.201	219.218	153.647	237.33	205.996	370.642	525.232	271.21	278.991	402.486	298.694	300.709	397.055	288.748	242.782	235.478
Chrac1	232.469	28.356	49.5208	0	0	18.5507	58.8601	66.8813	36.9552	35.6886	9.19129	13.481	32.0095	72.8963	7.38391	9.97985	16.5616	11.1226	25.7605	21.2578	14.3539	2.82288	10.0281	8.50762	35.9887	46.3143	17.0493	24.3153	54.7411	73.1507	15.5336	28.2223	32.4501	34.0005	11.7658	12.7036	39.3859	50.9163	37.6255	80.9165	14.63	11.8169	15.0098	35.5482	38.7451	42.2221	58.3337	13.6944	41.6667
Chst12	0	0	0	0	0	0	0	0	0	0	0	0	15.1714	0	0	0	0	0	0	0	0	0	0	0	0	0	0	0	0	0	0	0	0	0	0	0	0	0	0	0	0	0	0	0	0	0	0	0	0
Chtf18	0	0	0	0	0	0	0	0	0	0	0	56.5285	0	0	47.5827	37.4031	51.3141	74.6814	0	0	133.858	137.176	54.627	98.0878	0	0	58.3236	75.1357	0	0	29.3392	43.574	39.9109	28.8054	60.8146	47.3255	0	0	0	0	45.5544	62.9135	123.376	57.9826	55.1995	71.165	87.9236	82.9581	0
Chtf8	0	0	0	0	0	0	0	0	0	0	0	0	0	0	0	0	0	0	0	0	25.9775	0	0	20.8816	0	0	0	0	0	0	0	0	0	0	12.4801	16.7234	0	0	0	0	28.5097	0	0	0	0	0	0	3.00387	0
Chtop	33.4015	0	0	0	0	0	0	0	0	0	47.7692	81.998	21.8304	140.785	37.6936	52.5626	87.9505	33.4593	55.7519	30.0145	8.76039	0	33.621	82.0951	52.4292	76.1843	107.568	99.562	0	0	36.0935	59.2954	0	54.8823	56.4918	97.8803	52.7826	77.5662	0	0	106.77	51.0325	41.6899	100.017	41.3728	29.9795	0	22.6453	101.153
Churc1	0	0	0	0	0	0	0	0	0	0	0	0	47.9678	0	5.01131	30.19	0	0	0	0	11.2818	30.3493	0	0	0	0	0	0	0	0	9.22216	15.1707	0	38.8993	0	0	28.3646	88.2062	0	0	0	0	47.7714	35.9587	23.7033	28.9763	18.531	37.9494	0
Ciao1	0	0	0	0	0	0	0	0	0	0	71.5353	85.4995	0	0	0	0	118.472	93.588	0	0	0	0	80.2441	79.6403	0	0	112.222	87.2837	21.721	43.7279	37.8052	0	0	0	33.7029	54.3513	49.2787	38.9198	0	0	70.4582	101.93	0	73.6979	95.6308	73.7129	0	130.578	0
Ciapin1	17.2339	0	0	0	0	0	167.155	37.4118	128.607	279.539	190.212	276.349	72.0603	19.5193	313.611	230.736	151.203	233.562	373.804	173.146	276.563	491.93	161.631	243.271	394.255	141.387	191.911	282.901	0	0	167.055	121.625	373.979	267.71	231.778	350.807	251.456	136.621	550.662	618.839	194.615	223.285	161.574	147.561	208.386	209.596	297.451	360.421	0
Cib1	0	0	0	0	0	0	0	0	0	0	0	0	0	0	0	0	0	0	0	0	0	0	0	0	0	0	0	0	0	9.29539	0	0	0	0	0	0	0	0	0	128.54	48.528	88.0568	0	0	3.89862	234.321	0	10.7116	0
Cic	0	0	814.006	0	0	0	0	0	0	0	0	0	7.6623	14.1634	208.479	0	41.4556	0	120.861	0	104.346	165.905	29.5032	0	0	0	0	0	0	0	40.6074	97.9431	0	79.7096	0	14.4034	0	0	0	0	0	0	78.1664	0	0	0	218.718	37.0317	0
Cir1	0	0	0	0	0	0	0	0	0	0	3.24855	5.31832	0	0	0	0	1.69256	2.05528	0	0	0	0	0	6.74686	0	0	0	0	0	0	26.6236	0	0	0	0	0	0	0	0	0	0	0	0	0	0	0	0	0	0
Cirbp	347.116	386.543	362.897	375.579	285.555	277.522	167.338	318.175	245.661	260.544	107.348	186.23	81.7194	78.5272	154.701	315.225	245.177	169.158	123.01	234.528	209.931	98.9916	202.427	148.952	208.701	120.401	111.698	67.4256	185.462	403.354	83.857	116.136	358.279	128.612	156.477	107.608	71.9738	90.3265	263.632	133.262	80.8987	65.2913	52.3132	57.0327	115.701	74.4022	97.5416	56.4187	430.743
Cisd1	69.4323	0	0	0	125.716	100.276	83.4384	106.652	27.6691	47.956	122.201	60.0493	65.3319	102.491	76.9114	57.2412	73.8841	81.3368	98.2919	85.7756	83.4539	77.0909	125.157	90.2851	63.9143	33.7097	61.1983	76.136	61.0959	47.2391	67.0236	131.199	39.8406	100.764	113.83	121.957	62.8883	66.0082	43.0767	0	68.6011	97.3294	127.811	18.0512	42.6854	37.5475	60.6442	47.1636	41.9152
Cisd2	37.6118	110.706	98.5176	0	137.554	162.299	235.286	239.619	178.102	176.973	143.79	108.469	100.319	110.514	162.261	105.112	115.874	172.192	147.47	201.229	108.153	129.423	133.142	108.621	100.883	89.393	98.2287	116.441	99.6442	127.174	81.0373	106.911	80.1145	124.916	146.992	117.333	141.127	84.4733	200.219	333.693	125.887	135.877	127.935	131.666	77.1389	122.831	83.8337	99.9348	159.78
Cish	0	0	0	0	0	0	0	0	0	0	0	0	0	0	0	0	72.3153	50.9499	0	0	0	0	0	0	0	0	0	0	0	0	0	0	0	0	0	0	0	0	0	0	0	0	0	0	0	0	0	0	0
Cit	0	0	0	0	0	0	0	0	0	0	0	0	0	0	0	58.2199	0	0	0	0	0	0	0	0	0	0	29.1464	0	0	0	69.1446	0	0	0	0	106.208	0	0	0	0	85.0413	150.006	122.927	219.3	228.761	80.8495	157.888	183.434	0
Ciz1	0	0	0	0	0	0	0	166.157	0	0	47.5096	84.3439	48.135	113.817	23.4013	58.1977	24.8155	53.4406	105.884	63.254	0	56.7537	49.0902	96.2081	0	0	0	0	25.7211	28.3348	146.629	403.07	73.2052	405.89	0	57.0975	0	84.4138	0	0	101.76	48.703	0	0	0	24.7543	11.7373	65.8616	0
Ckap2	0	0	0	0	0	0	0	0	0	0	0	0	0	0	83.0758	0	0	0	0	0	62.5639	116.9	0	0	0	0	0	0	0	0	106.529	0	87.0769	0	0	0	0	0	0	0	0	83.2533	27.3909	0	83.2765	112.74	145.863	65.4487	0
Ckap2l	0	0	0	0	0	0	0	0	0	0	0	0	44.2666	0	0	0	0	0	0	0	0	40.316	0	0	0	0	0	0	0	0	0	28.0634	0	5.3927	0	0	5.06411	0	0	0	0	0	0	45.0747	194.206	22.3097	41.0333	3.94965	0
Ckap4	176.813	113.318	0	0	61.4699	91.5506	141.015	251.445	133.621	243.913	163.259	236.067	211.539	318.083	386.896	245.888	264.081	269.761	493.289	800.353	424.799	518.56	364.532	470.621	511.183	1292.05	277.252	194.919	368.643	407.37	328.935	342.699	464.279	385.733	590.988	706.819	0	0	0	0	0	0	647.574	611.511	641.342	765.632	819.297	927.87	120.534
Ckap5	0	0	0	0	0	36.9419	373.931	1396.75	190.455	361.27	129.287	232.833	111.898	185.393	271.871	431.283	214.131	217.009	587.967	628.651	438.715	506.272	289.848	265.392	1568.43	2114.73	466.295	639.72	966.344	825.404	521.621	683.922	674.864	689.921	361.44	514.22	1108.56	1158.85	566.967	466.884	468.839	642.283	864.103	577.792	519.107	511.299	733.395	758.515	131.74
Ckb	320.055	182.6	221.232	0	325.118	354.356	143.33	107.586	138.107	147.893	124.527	91.3551	83.3663	166.342	120.534	96.592	121.521	75.7849	115.057	210.101	49.4902	123.411	76.1393	80.1275	0	0	38.0876	17.1001	0	38.5166	11.1868	21.5751	57.8378	31.7196	65.4716	23.4275	0	0	0	0	0	0	0	25.3103	32.9967	0	0	30.169	203.791
Ckm	455.009	206.295	394.16	122.145	273.257	296.417	1172.65	1020.27	367.597	340.595	220.682	258.396	40.9389	114.758	235.761	313.082	115.83	103.961	0	0	0	0	45.2027	55.6783	0	0	65.7894	12.4724	0	0	0	0	72.0483	39.8545	22.129	15.0376	0	0	0	0	0	0	22.1752	0	0	0	135.31	19.1508	0
Ckmt2	0	0	0	0	0	0	0	0	0	0	0	0	0	0	0	0	0	0	0	25.9092	0	0	0	0	0	0	0	0	0	0	0	0	0	0	0	0	0	0	0	0	0	0	0	0	0	0	0	0	0
Cks1b	0	0	0	0	0	0	0	0	35.3778	33.5599	0	23.8943	0	0	0	35.4065	23.7871	24.2028	84.8813	31.8714	18.1085	0	13.847	20.1451	0	0	28.1604	27.0406	0	0	41.2623	0	34.9322	54.0988	20.8246	41.9587	18.7973	43.9926	62.2713	82.1746	9.92927	20.6469	0	15.7603	16.7592	47.7663	29.2158	28.4944	0
Cks1brt	0	0	0	0	0	0	0	0	0	0	19.7585	0	0	0	0	0	0	0	0	0	0	0	0	0	0	0	0	0	0	0	0	0	0	0	0	0	0	0	0	0	0	0	0	0	0	0	0	0	0
Cks2	0	0	0	0	110.225	64.303	146.284	776.5	57.0346	38.6981	81.9659	44.1796	10.0728	29.27	20.7408	19.4237	86.2798	77.0625	48.9037	65.9804	14.7183	28.6701	58.6662	91.7473	53.3101	98.6652	137.471	148.894	137.64	107.585	41.6771	55.1854	217.209	354.942	76.2561	72.0358	97.2686	116.735	358.697	469.475	141.992	151.797	143.779	63.2764	40.38	51.8692	163.843	123.989	0
Clasp1	0	0	0	0	436.202	451.547	0	0	116.559	0	132.262	14.6731	64.179	55.1553	181.615	202.709	109.962	94.0823	139.884	188.784	313.348	510.528	331.139	243.299	30.3567	216.821	366.282	330.892	216.178	105.205	228.358	192.457	218.741	291.962	212.013	118.929	122.837	260.922	110.437	84.5867	254.495	329.94	343.944	193.039	318.409	227.54	388.785	241.74	88.637
Clasp2	0	0	712.309	0	0	0	327.267	392.396	276.058	424.364	103.007	198.437	89.2756	81.9464	375.802	369.441	287.473	255.765	296.105	250.457	289.002	145.673	176.547	210.067	735.508	344.779	559.252	388.408	503.015	374.839	314.593	395.089	332.02	88.6232	155.747	220.702	364.481	461.768	975.351	544.581	403.106	300.063	129.816	463.812	177.654	300.269	573.612	260.195	97.5555
Clasrp	0	0	0	0	0	0	0	0	0	0	80.2346	6.9484	0	0	0	40.6673	20.3076	0	0	0	85.8564	57.4774	4.69765	0	0	0	0	0	0	0	0	0	15.1156	15.5268	0	0	0	21.1978	26.6083	0	0	0	0	20.2357	0	0	0	5.02363	62.9136
Clca3a1	0	0	0	0	85.0162	124.935	0	0	22.9143	0	0	40.504	0	0	0	0	0	0	0	0	0	0	0	0	0	0	0	0	0	0	0	0	0	0	0	0	0	0	0	0	10.5965	52.4769	0	0	0	0	0	0	646.991
Clcc1	35.2991	0	0	0	137.218	88.8725	0	38.4736	95.805	120.746	79.7971	68.8238	42.3662	30.6084	132.368	118.729	53.9085	50.1932	73.529	148.47	46.045	114.164	42.4792	20.3958	0	90.7229	11.4108	51.3669	10.0307	79.3803	52.4911	97.3204	43.012	101.506	28.7766	8.21181	110.232	75.6802	0	0	31.1441	35.822	112.301	131.616	153.537	85.4016	105.513	31.5273	66.3162
Clec12a	0	0	0	0	0	0	0	0	0	0	0	0	0	0	0	0	0	0	0	0	0	0	0	0	0	0	0	10.0165	0	0	0	0	0	0	61.0891	113.245	0	0	0	0	0	0	42.8537	148.61	0	127.461	12.2808	72.274	0
Clec16a	0	0	0	0	0	0	0	0	0	0	0	0	0	0	0	0	0	0	0	0	0	0	0	21.5885	0	0	0	0	0	0	0	0	0	0	0	0	0	0	0	0	0	0	0	0	0	0	0	0	0
Clec2d	97.3762	0	0	0	0	0	0	0	0	0	42.9388	62.8551	34.4186	72.4049	0	30.5949	72.0224	50.7475	66.0459	0	0	0	20.0457	61.5667	0	0	63.6811	93.643	0	11.5364	64.4835	55.1005	0	22.491	40.9743	62.4102	0	0	0	0	0	37.8062	0	0	0	0	0	0	145.732
Clec2g	0	0	0	0	0	0	0	0	0	0	0	0	0	0	0	0	0	0	0	0	0	0	0	0	0	0	0	0	12.9525	0	0	0	0	0	0	0	0	0	0	0	0	0	0	0	0	0	0	0	0
Clic1	2434.22	1506.76	1997.64	2234.7	963.383	1101.62	1552.55	1299.66	1451.97	1383.45	993.13	956.691	1535.76	1191.68	1769.88	1520.45	1167.31	1134.49	1174.25	1195.76	1269.82	1259.44	1104.99	1200.87	1379.05	1458.5	1171.61	1038.07	991.284	1165.5	947.393	1218.08	1696.8	1544.17	1055.72	1126.06	1049.11	852.924	1049.89	993.38	869.013	844.257	1181.03	1061.08	1050.69	795.546	1171.22	790.62	1642.78
Clic4	617.519	386.407	386.645	377.07	313.526	160.211	301.504	274.125	375.113	474.458	378.311	388.412	452.667	493.776	272.689	253.285	223.543	252.921	545.531	358.276	357.424	248.99	259.903	271.918	262.084	275.068	170.24	363.487	182.519	202.06	177.884	492.525	190.955	494.205	136.624	226.429	191.48	280.32	160.722	162.426	225.954	249.012	224.498	219.087	111.22	109	74.0065	72.2239	283.255
Clic5	0	0	0	0	88.2738	0	0	0	0	0	38.0634	0	38.7339	0	44.1107	73.648	0	0	171.711	82.8044	67.8667	0	0	45.6841	0	0	0	0	0	0	56.1261	0	35.845	0	0	0	78.7586	84.6361	0	0	0	0	0	0	48.1245	0	0	0	0
Clic6	64.9764	0	0	234.142	0	0	0	195.605	0	0	0	0	0	0	0	0	0	64.8983	0	0	0	0	0	0	0	60.6611	0	0	0	0	0	0	0	0	0	42.3912	0	0	149.363	0	0	0	0	0	0	0	0	0	0
Clint1	192.508	310.608	227.687	608.856	332.368	280.389	410.532	412.028	308.428	408.003	297.839	282.685	186.454	240.574	475.501	407.552	293.361	267.276	307.906	412.701	345.892	279.656	334.164	320.656	544.596	957.183	285.792	290.694	303.586	151.622	321.946	412.14	582.194	401.146	484.797	518.571	447.798	548.879	513.647	603.151	472.213	425.116	331.231	377.641	298.066	262.955	353.049	370.702	258.389
Clip1	419.326	0	572.349	586.972	257.143	323.905	641.011	478.83	481.293	588.714	221.636	297.895	378.356	375.132	440.246	488.294	371.535	482.396	415.926	469.474	354.604	468.457	459.586	402.361	374.308	582.558	392.442	268.459	292.697	351.306	314.621	330.049	424.672	348.894	181.585	196.762	332.503	242.697	444.768	382.364	248.739	207.239	471.356	304.136	340.466	425.298	402.936	340.664	685.467
Clip2	0	0	0	0	77.7031	44.9332	0	0	0	112.485	112.508	102.92	70.6068	51.5099	145.497	129.032	100.67	88.3075	55.0151	46.5838	147.078	130.464	170.917	105.742	0	0	0	0	0	0	74.0711	96.8818	102.25	113.774	81.1292	27.2498	0	0	0	0	0	0	0	68.0229	119.597	0	0	0	87.1627
Clip4	0	0	0	0	0	0	0	0	0	0	0	0	0	0	0	0	0	0	0	0	0	0	0	0	0	0	0	0	0	0	0	0	0	107.889	0	0	0	0	0	0	0	0	0	0	0	0	0	0	0
Clk2-scamp3	0	0	363.208	0	151.13	0	253.735	118.39	160.313	229.018	0	79.0989	0	0	100.804	102.353	79.0106	52.4938	75.2083	226.159	102.907	0	112.797	61.0132	0	0	0	0	122.213	0	127.088	254.484	125.003	0	190.475	121.167	0	81.4847	417.136	218.02	217.006	140.348	103.585	80.7563	159.066	0	249.984	108.015	302.246
Clk3	0	0	0	0	0	0	0	0	0	0	0	0	9.44976	0	0	127.117	58.3088	64.5428	127.305	45.8845	0	52.8996	63.6598	44.0418	0	0	52.3771	44.6608	0	48.6653	49.1168	231.967	23.0174	78.7507	5.48453	0	0	0	0	0	0	28.8006	65.658	0	39.6524	13.7702	45.9642	32.3686	0
Clk4	0	0	0	0	0	0	0	0	0	0	0	0	0	0	0	0	0	0	0	0	0	0	0	0	0	0	0	0	0	0	0	0	0	0	0	0	0	0	0	0	0	0	0	0	0	0	0	0	0
Clmn	0	0	0	0	0	0	0	0	0	0	0	0	0	0	0	0	0	0	0	0	0	0	0	0	0	0	0	0	3498.33	3593.63	0	0	0	0	0	0	0	0	0	0	0	0	0	0	0	0	0	0	0
Cln5	0	0	0	0	0	0	0	0	0	0	0	0	0	0	0	0	3.78939	0	0	0	0	0	0	0	0	0	0	0	0	0	0	0	0	0	0	0	0	0	0	0	0	0	0	0	0	0	0	0	0
Cln8	0	0	0	0	0	0	0	0	0	0	0	0	0	0	0	0	0	0	0	0	0	0	0	0	0	0	0	0	0	0	0	0	0	0	0	0	0	0	0	0	0	0	0	0	0	0	0	8.20203	0
Clnk	0	0	0	0	0	0	0	0	0	0	0	0	0	0	0	0	0	0	0	0	0	39.7528	0	0	0	0	0	0	0	0	0	0	0	0	0	0	0	0	0	0	0	0	0	0	0	0	0	0	0
Clns1a	395.698	756.062	1339.22	1039.62	53.167	48.7972	398.195	585.824	371.774	513.162	188.706	162.636	265.408	224.859	152.627	159.509	129.494	155.711	415.988	326.614	95.1858	157.617	128.325	190.824	345.97	493.98	269.8	381.946	191.382	251.4	86.1191	325.009	132.746	230.099	227.778	189.532	1455.33	202.279	228.695	189.103	213.413	209.646	246.801	226.536	150.198	88.5175	148.347	234.515	238.085
Clp1	41.7433	38.2395	188.494	120.788	65.0024	56.9582	119.364	85.5159	128.968	193.681	65.5762	67.7311	24.1182	33.0231	111.088	103.642	33.0706	86.6709	52.715	70.3096	111.039	201.622	109.515	116.016	118.997	84.5837	39.9222	54.2034	0	47.7574	102.931	85.2784	60.956	69.2688	107.338	181.928	51.4816	34.8298	40.9829	26.3799	146.107	46.4971	29.0509	34.9936	29.7688	62.4751	125.45	67.1793	81.722
Clpb	0	0	0	0	0	42.9833	0	0	0	0	64.3842	22.0671	26.5598	30.9636	53.7979	59.7725	26.4992	30.7415	0	0	0	118.997	37.9614	77.0554	0	0	71.3171	58.9113	74.1405	0	50.9383	73.2095	0	86.406	32.8285	60.5588	0	34.5858	0	0	54.4613	64.9488	0	74.0499	92.3362	54.2585	56.5662	111.206	0
Clpp	223.806	0	48.9185	0	0	52.932	49.8314	0	79.9507	102.769	132.299	203.12	195.965	304.825	157.235	117.847	167.56	156.947	191.887	47.4715	54.8345	32.1009	142.126	162.375	74.756	37.626	87.0686	134.782	0	28.6728	120.115	205.592	97.3226	77.9831	221.234	151.299	47.3813	110.51	16.2313	84.6789	151.503	131.741	87.8995	62.8191	120.83	43.5414	32.7472	94.9931	324.979
Clptm1	30.022	0	31.2132	0	0	0	89.26	56.6945	22.9386	30.3466	54.3324	24.262	97.0782	77.4667	27.5268	26.4743	48.6371	47.4092	123.645	104.432	0	58.056	33.3675	43.7386	93.3321	37.702	45.5301	34.9117	119.085	122.089	102.804	162.479	26.1526	154.587	132.564	108.031	197.667	211.802	48.9527	64.2618	135.648	168.507	67.5111	213.485	197.108	101.993	67.0218	97.8474	133.985
Clptm1l	0	0	0	0	0	0	0	0	0	0	19.9874	12.1755	0	0	0	0	29.923	6.25788	0	0	0	0	0	47.8335	0	0	0	0	0	0	13.0427	16.2489	0	15.0514	0	0	0	0	0	0	8.94362	13.3695	0	36.6407	46.5201	30.1651	0	33.5139	0
Clpx	0	0	0	0	127.67	297.595	76.8587	124.737	166.395	191.341	76.1563	84.742	38.4689	16.87	105.451	155.496	195.523	161.845	57.6974	179.52	150.073	87.7208	197.575	171.998	315.055	0	128.121	132.434	254.153	197.832	88.962	205.4	259.058	158.412	218.275	177.294	674.263	823.715	299.744	296.115	199.386	285.047	145.673	118.689	191.139	129.199	107.85	245.832	199.524
Clspn	0	0	0	0	0	0	0	0	0	0	0	0	0	0	0	0	0	0	0	0	0	0	0	0	0	133.3	35.0553	157.348	0	0	0	98.0849	0	63.2688	0	0	0	0	0	0	67.7415	34.2919	73.9058	0	0	0	0	51.1538	0
Clta	130.697	0	0	120.83	161.457	180.729	150.094	167.025	0	0	148.497	138.062	63.2351	144.651	42.5569	67.9837	151.3	179.441	178.434	0	60.7248	0	140.056	186.661	288.497	0	217.312	183.582	143.472	253.841	111.499	0	0	91.1638	285.736	224.414	152.441	221.739	108.463	0	235.781	222.845	57.2468	166.819	110.309	128.421	35.177	176.925	266.002
Cltb	29.1158	137.671	0	0	237.189	238.06	0	138.269	60.3649	38.1167	127.754	106.201	21.9022	41.2549	14.5557	24.7733	87.7932	64.7238	0	58.6784	33.5816	0	169.926	94.1862	0	0	0	25.8149	0	0	0	0	0	0	49.2387	105.514	0	0	0	0	32.7743	28.9945	0	65.0059	57.6817	18.7762	0	14.0639	127.943
Cltc	822.183	3249.48	1304.95	1229.3	1940.02	2003.61	1473.02	1333.21	1736.41	1739.19	1836.59	1750.71	1367.13	1513.75	1813.3	1670.83	1440.74	1360.72	1042.62	1572.97	1536.65	1320.71	1535.56	1357.21	1079.76	1058.9	1708.57	1692.93	1418.51	1570.76	1885.32	1416.74	1284.91	1431.18	1535.31	1681.09	2121.34	2057.78	1785.2	1832.95	1815.44	1736.78	1855.3	1888.93	1751.85	1838.58	2101.13	2023.35	1655.57
Clu	0	0	0	0	0	0	0	0	0	0	0	0	0	0	0	0	0	0	0	0	0	0	0	0	0	0	0	0	0	0	0	0	0	0	0	0	0	0	0	0	0	0	0	0	0	0	0	0	0
Cluap1	19.1727	0	0	0	0	0	0	0	0	43.9676	35.9656	11.2858	0	0	33.7195	83.8595	4.81425	0	0	0	59.8238	0	6.5177	0	0	0	0	0	0	0	0	0	12.4793	0	0	0	0	0	0	0	0	0	0	0	0	0	43.8783	0	0
Cluh	0	265.121	189.558	0	52.6874	87.4418	513.694	503.776	868.925	341.236	209.15	185.466	190.308	382.184	531.324	766.808	201.48	244.945	266.015	324.57	371.908	300.685	199.046	202.504	283.833	177.237	441.654	554.758	378.037	509.669	272.746	342.65	386.3	317.462	364.72	261.298	789.531	832.441	979.699	899.847	601.979	689.77	479.836	598.053	529.777	384.227	611.181	367.483	211.464
Clybl	0	134.585	158.991	90.1304	83.3941	152.915	118.231	118.459	215.508	116.946	119.031	81.4647	32.195	36.2309	138.942	107.389	97.5871	93.0485	158.667	132.263	44.4098	110.636	99.1324	105.976	0	0	7.72296	0	13.0272	0	110.872	39.2143	46.4752	51.1329	82.2285	82.0496	293.72	334.885	273.366	274.485	303.416	288.972	0	33.938	42.0795	34.887	33.7615	36.3027	161.74
Cma1	0	0	0	0	0	0	0	0	0	0	0	0	40.0297	94.6907	17.5067	60.8809	156.187	142.74	0	0	0	0	0	0	0	0	0	0	0	0	0	0	0	0	0	0	0	0	0	0	0	0	0	0	0	0	0	0	0
Cmah	0	0	0	0	0	0	0	0	0	0	0	0	0	0	0	0	0	0	0	0	0	0	0	0	81.4937	108.41	63.5363	193.662	197.688	112.493	0	0	0	0	0	0	0	0	0	0	0	0	0	0	0	0	0	0	0
Cmas	135.49	406.242	409.226	0	281.337	272.85	190.516	280.49	102.057	46.341	189.068	181.757	163.292	120.195	59.2046	82.241	134.817	100.279	182.586	91.7944	65.5464	23.2682	89.4479	134.215	106.427	0	45.2318	38.409	110.829	111.967	183.153	93.9021	151.18	137.588	57.6067	62.4713	104.229	83.2185	0	119.46	77.6714	67.5105	71.4279	51.6004	141.03	50.0018	22.031	39.5771	215.441
Cmc1	0	0	0	0	32.6513	56.6836	0	0	31.2521	0	34.8452	16.2711	7.9575	30.6509	41.8153	83.6503	29.6826	49.5927	70.0605	0	77.4605	0	28.2328	37.975	31.2815	34.8866	0	14.9177	0	40.2528	52.073	68.2805	0	0	31.1696	39.0396	0	26.0658	81.857	110.057	53.193	91.3632	28.8712	0	0	0	40.1041	20.7295	0
Cmip	0	0	0	0	0	0	0	0	0	0	0	0	0	0	0	0	0	0	0	0	24.7155	0	0	0	0	0	0	0	0	0	12.1441	0	0	0	0	0	0	0	0	0	0	0	0	0	0	0	21.8981	45.7527	0
Cmpk1	648.331	613.629	417.188	971.698	613.593	870.622	635.216	593.171	526.301	616.953	461.103	406.665	343.213	372.775	293.731	445.845	431.435	344.379	229.792	395.178	149.054	256.008	384.772	318.971	573.08	547.502	443.777	461.281	536.298	529.638	260.419	339.818	383.612	342.46	348.162	341.95	457.149	306.151	536.85	691.678	327.973	289.527	356.78	154.853	166.017	272.184	324.422	205.29	534.448
Cmpk2	422.9	909.515	544.217	613.141	800.144	779.547	381.639	412.697	380.019	372.275	407.122	397.237	258.844	231.494	278.865	298.681	358.956	405.783	440.933	302.756	207.847	149.202	259.805	282.762	0	151.128	215.78	197.568	252.996	155.25	233.57	227.469	266.867	261.479	138.254	124.672	284.548	227.046	351.137	324.439	274.135	220.002	91.4876	128.31	85.863	92.9659	63.4148	89.0008	429.943
Cmss1	0	32.5842	0	0	51.044	34.2813	75.775	130.207	31.103	83.685	61.6187	100.176	69.0733	60.3992	72.983	89.7146	57.8046	114.252	43.1575	160.106	205.256	139.445	109.854	78.4672	56.1214	43.5862	99.4888	96.6502	105.615	102.477	43.8789	120.395	115.972	77.1047	54.7467	104.662	117.291	88.6703	0	0	149.548	89.805	58.8859	69.1418	85.8041	95.0725	76.2401	84.3064	0
Cmtm6	0	0	0	0	0	0	0	0	0	0	0	0	0	0	0	0	0	0	0	0	0	0	0	0	0	0	0	0	0	0	0	14.8287	0	0	0	0	0	0	0	0	3.11415	0	0	0	14.5892	0	0	0	0
Cmtm7	39.1681	0	25.5097	0	78.7179	20.3215	38.5073	10.3037	15.3671	30.6526	24.0521	55.6854	41.9256	22.6168	33.4958	42.5674	36.9353	20.8599	72.5734	25.2667	34.5979	12.1529	38.7469	44.6162	0	0	34.1758	16.4276	45.7325	34.7446	50.7533	73.2843	35.5016	50.8467	61.4679	66.607	58.4254	19.3421	0	0	31.1852	14.0885	58.5487	15.4195	7.82769	26.0299	15.5512	10.4672	20.0492
Cmtr1	0	0	0	0	180.386	122.399	0	0	163.537	112.692	109.566	69.7661	38.9117	0	99.9295	88.0009	121.103	126.981	49.6024	72.8144	182.033	121.619	153.184	125.456	0	0	127.183	106.481	43.3938	30.8908	73.239	51.6068	47.8765	115.534	21.2501	107.221	0	112.116	0	0	74.2422	88.9962	0	37.8662	115.822	91.8808	64.2979	85.424	51.9422
Cmtr2	0	0	0	0	0	0	0	0	0	0	0	0	0	0	0	0	0	0	0	0	0	67.9893	0	0	0	0	0	0	0	0	0	0	0	0	0	0	0	0	0	0	0	17.0376	0	0	0	0	0	0	0
Cnbd2	0	0	0	182.918	0	0	0	0	0	64.0891	0	0	0	0	0	0	0	0	0	35.3644	0	0	0	0	0	0	0	0	0	0	0	0	0	0	0	0	175.264	0	0	0	0	0	0	0	0	0	0	0	0
Cnbp	160.877	244.537	346.219	775.399	662.683	614.07	880.865	654.874	936.009	713.222	601.598	873.466	318.13	84.0559	1465.93	976.052	939.564	694.548	1274.19	945.157	1286.23	829.997	698.436	706.453	964.566	906.608	1078.51	868.589	748.498	707.372	1310.31	1068.23	472.836	1110.44	892.867	860.502	1456.81	1491.14	634.327	348.531	1092.14	748.618	1598.65	849.056	1206.72	1435.31	764.999	1054.89	544.835
Cndp2	709.88	801.022	1305.75	812.874	324.298	520.788	493.802	543.255	685.524	852.872	431.769	491.331	966.199	773.903	602.522	601.071	593.153	620.006	528.294	671.662	459.155	468.806	555.068	581.049	499.13	539.833	466.972	422.108	495.134	531.113	420.685	557.481	655.444	625.407	439.505	440.044	498.584	629.261	791.441	1129.04	439.08	627.2	560.427	670.04	643.764	467.854	1018.57	477.006	577.112
Cnga2	0	0	0	0	0	0	0	0	0	0	0	0	0	0	0	0	0	0	0	0	0	0	0	0	0	0	0	0	0	0	0	0	0	0	0	0	0	0	0	0	0	0	0	0	0	0	0	0	0
Cnih4	0	0	0	0	0	0	0	0	0	0	15.6375	0	14.3889	0	0	0	0	8.49072	0	0	0	0	17.0514	14.3691	0	0	0	0	0	0	0	0	0	45.8805	9.72776	32.6317	0	0	0	0	0	0	23.0216	0	0	0	0	12.9356	0
Cnn2	93.7583	0	0	0	143.257	189.609	157.789	110.238	74.1811	71.9528	314.698	234.986	37.9241	85.738	48.8777	89.3885	239.195	188.295	198.885	46.346	117.925	0	161.971	212.01	110.359	89.742	159.928	121.19	149.33	132.672	188.638	54.2136	21.851	161.996	190.415	216.263	0	0	0	0	42.0024	42.9284	182.971	151.769	105.482	120.031	87.5505	130.302	352.147
Cnn3	0	169.229	0	0	62.3423	36.7753	0	0	0	0	0	0	21.9119	0	32.5464	58.2092	13.7956	20.8545	61.6839	129.646	0	59.218	167.979	148.691	575.922	567.759	555.061	520.814	255.827	565.591	42.744	119.701	103.271	101.687	93.0897	90.65	0	0	0	0	48.7652	38.1253	113.86	90.0014	26.3509	40.5731	25.2643	67.9691	0
Cnnm2	0	0	0	0	0	0	0	0	0	0	0	0	0	0	0	0	0	0	0	0	0	0	0	0	0	0	0	0	0	0	0	0	0	0	0	0	0	0	0	0	0	0	46.2054	0	0	0	0	0	0
Cnnm3	0	0	0	0	0	0	0	0	0	0	0	0	0	0	0	0	0	0	0	0	0	0	0	0	0	0	0	0	0	0	20.6415	44.9915	0	32.8647	0	0	0	0	0	0	0	0	114.603	98.4373	74.3934	84.1258	0	54.2887	0
Cnnm4	0	0	0	0	0	0	0	0	0	0	0	0	0	0	0	0	0	0	0	0	0	0	0	0	0	0	0	0	0	0	0	0	0	0	0	0	0	0	0	0	0	0	0	0	0	0	0	34.1051	0
Cnot1	0	0	0	0	336.682	334.19	431.786	283.708	293.713	364.588	458.744	382.706	334.167	293.258	468.787	384.732	493.999	490.257	493.213	466.988	386.991	518.039	522.647	489.284	222.388	346.146	496.334	581.913	451.223	633.67	672.705	457.024	435.215	456.171	538.139	653.231	631.555	447.928	213.315	336.789	529.211	585.814	420.379	675.516	498.441	528.767	508.267	495.43	225.682
Cnot10	0	0	0	0	316.739	259.353	434.081	0	178.105	593.863	98.7637	136.305	28.6101	0	73.5405	63.3372	75.2439	70.3257	89.763	240.298	24.5462	221.54	31.1622	18.7516	0	431.29	67.7744	58.5295	0	0	104.963	106.804	145.252	43.4394	84.6074	68.2221	180.561	255.088	0	0	80.8088	29.3375	15.1189	136.822	106.868	124.63	51.0048	45.9716	0
Cnot11	0	0	0	0	0	0	0	0	0	0	7.52217	0	90.4587	0	35.1178	27.2385	42.1752	75.0735	44.9829	20.258	62.4636	21.2488	28.429	49.1475	0	0	0	20.0188	35.2409	0	24.6328	78.6973	30.7534	38.3196	17.9184	57.9667	0	0	15.162	0	29.9516	31.6604	87.7134	0	0	41.2649	65.0111	32.879	0
Cnot2	17.7724	0	279.973	0	0	3.23661	257.819	0	131.692	23.6847	0	52.377	23.6892	35.0684	153.515	139.067	72.3071	51.8933	35.9926	45.653	133.623	115.227	102.648	75.8292	250.779	126.2	38.0333	56.33	196.839	209.915	131.353	78.3599	112.899	129.78	17.4522	27.613	117.02	86.7815	113.378	50.1091	89.5621	94.7588	0	0	0	0	41.0375	23.6347	45.4515
Cnot3	65.814	196.085	174.579	229.876	46.9591	114.044	232.76	113.474	78.4015	55.1226	37.867	50.2557	86.3264	124.782	53.9506	50.9813	91.9099	115.539	243.167	132.344	144.358	61.6869	62.051	98.0455	141.97	146.983	157.414	189.877	154.31	120.244	127.276	127.375	187.57	162.182	162.064	130.947	176.852	245.966	960.18	956.384	169.584	104.414	96.2591	103.435	97.2454	96.6037	116.583	96.3279	62.5553
Cnot4	0	0	0	0	0	0	0	0	0	0	0	0	0	0	81.8421	78.8518	0	51.483	0	0	61.4554	115.116	0	0	0	0	0	0	67.2473	0	79.0826	0	88.2455	0	62.1761	0	0	0	0	0	30.0996	28.591	53.1665	30.3192	42.3488	0	95.3728	46.476	0
Cnot6l	0	0	0	0	132.405	0	0	0	0	41.9785	62.806	124.492	16.4578	28.8048	0	0	115.372	59.6213	112.523	0	192.079	0	12.5984	63.784	0	0	127.826	61.5288	86.8859	36.8002	0	23.4398	22.1567	0	85.244	11.6056	0	0	0	0	72.2964	9.40624	0	0	0	0	0	40.5285	0
Cnot7	36.0179	0	0	0	18.3458	20.676	36.0965	74.2428	28.3028	49.2158	34.7199	47.0185	71.0153	26.1297	107.361	97.2167	57.7512	73.3772	17.2139	45.726	85.8148	62.7297	93.0123	84.2127	0	0	69.68	16.4364	33.7859	0	38.8852	69.5053	185.927	28.4105	60.0718	37.1997	105.473	42.2851	0	0	18.2215	33.3714	21.6892	0	0	13.3369	25.4598	56.8262	80.0956
Cnot8	0	0	0	0	0	0	0	0	39.3667	164.805	21.9428	33.7698	18.2778	0	54.9287	69.186	0	36.0054	0	0	0	0	52.3689	43.0574	252.85	0	48.318	83.8081	120.708	118.752	43.4551	48.8285	104.864	0	62.6315	111.768	66.9668	81.2935	173.161	69.5896	77.4765	106.418	0	161.064	81.2641	61.6412	70.7295	80.4614	0
Cnot9	0	0	0	0	65.3008	95.3291	0	0	0	0	37.3589	37.8831	67.7036	20.6306	14.1738	27.1059	33.2116	40.5485	16.2259	0	59.1497	40.1906	68.3473	47.4448	74.1726	45.3674	95.1923	69.4903	106.396	124.723	41.4866	16.7748	24.3118	13.4121	87.7614	93.6796	70.2846	96.6655	0	0	112.285	83.7425	0	45.6364	0	46.7512	0	35.7726	0
Cnp	7.79669	0	0	0	34.0764	41.5608	165.045	126.032	60.231	64.8469	45.8635	87.8526	56.3742	59.8085	41.129	32.0042	81.6517	84.1142	60.7446	185.369	83.5383	179.116	80.3502	49.3522	158.747	204.06	188.179	170.694	233.117	201.966	92.773	0	172.101	67.2495	71.4731	55.8737	113.289	165.878	0	0	83.5789	95.7515	0	61.4461	82.5409	99.6878	0	72.2072	0
Cnpy2	379.784	389.326	137.876	634.335	208.986	308.091	117.033	167.686	127.79	222.824	108.447	164.398	278.377	329.805	114.27	117.4	147.102	111.941	266.734	208.701	43.0746	0	111.222	114.013	520.211	557.851	172.167	181.275	268.092	176.549	178.548	202.735	255.26	157.25	152.981	188.414	205.075	299.067	642.701	513.451	89.7382	144.859	124.403	181.659	270.204	212.446	413.658	206.458	476.907
Cnpy3	95.6107	0	0	0	26.3192	73.9029	91.4733	59.507	72.238	50.8177	25.8129	76.9132	55.6334	53.2992	46.0195	32.4917	73.5011	43.0846	92.4498	129.994	102.784	87.9675	53.0675	41.9216	1337.7	1796.7	101.866	86.1947	83.1522	84.9587	49.6541	118.251	51.2303	1088.95	37.2324	99.8805	88.188	25.7169	52.9664	1617.47	46.3614	35.4246	106.438	60.0353	51.5487	60.3098	82.3092	52.2589	0
Cnpy4	0	0	43.19	12.2674	0	0	28.6285	0	0	76.5411	0	21.1086	0	36.404	37.5551	18.8955	0	0	91.5971	0	50.0319	25.698	0	4.75849	62.0349	78.0712	0	0	0	0	64.6525	11.7925	76.2347	35.8846	0	0	29.9731	0	0	92.5285	0	0	94.6171	104.526	52.6431	33.0403	50.3271	32.9722	67.368
Cnrip1	53.3305	63.8672	146.734	0	124.268	112.854	33.1956	35.9654	56.8616	22.0654	32.585	54.8938	57.492	100.011	13.7824	47.086	45.209	43.5519	22.198	60.2803	61.761	0	25.8153	32.5833	27.8815	34.6591	15.3915	37.8726	32.4894	36.8985	13.0283	22.6078	34.9777	0	5.01708	0	0	0	0	0	0	0	0	0	0	0	19.7223	0	79.4877
Cnst	0	0	0	0	0	0	0	0	0	0	0	0	0	0	0	0	0	0	0	0	0	0	0	0	0	0	0	0	0	0	0	52.964	0	0	0	0	0	0	0	0	0	0	0	0	0	0	0	0	0
Cntln	0	0	0	0	0	0	0	0	0	0	0	0	0	0	0	0	0	0	0	0	0	108.034	0	0	0	0	0	0	0	0	0	0	0	0	0	0	0	0	0	0	0	0	0	0	0	0	0	0	0
Cntn1	94.117	0	0	0	0	0	0	0	0	0	0	0	14.8239	0	0	0	0	0	0	0	0	0	0	0	0	0	0	0	0	0	0	0	0	0	0	0	0	0	0	0	0	0	0	0	0	0	0	0	0
Cntnap5a	0	0	0	0	0	0	0	0	0	0	0	0	0	0	0	0	0	0	0	0	0	0	0	0	0	0	0	0	0	0	0	0	0	0	0	0	0	0	0	0	0	0	0	0	0	0	0	0	0
Cntrl	0	0	0	0	0	0	0	0	0	0	0	0	0	0	0	174.437	0	0	102.194	0	143.407	606.356	0	37.2318	0	0	0	0	0	0	0	0	0	82.7825	0	0	0	0	0	0	0	0	0	111.64	0	75.8623	133.244	162.225	0
Cntrob	0	0	0	0	0	0	0	0	0	0	0	0	0	0	79.4153	0	4.81199	12.6752	0	0	0	0	0	0	0	0	0	0	0	0	0	0	0	0	0	0	0	0	0	0	0	9.2283	0	0	0	32.4316	0	10.6532	0
Coa3	0	0	0	0	93.7941	0	45.5952	0	31.5639	31.1843	18.6161	27.5991	0	15.0027	14.2529	25.2011	31.2324	24.8603	37.1836	42.401	0	0	14.5682	16.723	0	17.039	0	0	0	0	18.362	19.3189	42.9416	40.7538	52.2447	37.6944	43.5214	59.5497	82.9738	128.442	58.0053	68.1933	71.0855	18.7629	0	20.0514	0	42.5095	0
Coa6	0	0	0	0	0	0	0	0	0	0	14.6219	16.8137	23.5165	52.1849	0	0	0	0	0	0	0	0	45.1305	10.7173	0	0	0	13.8866	49.2082	20.0513	0	0	0	0	21.259	46.2728	77.1794	0	0	0	33.2407	39.6641	0	0	59.0915	49.6069	0	16.0403	0
Coa7	0	0	0	21.4999	20.4228	49.0863	88.3356	131.463	0	48.6785	35.6564	20.0899	0	14.2658	0	0	49.7148	57.725	0	149.319	0	0	28.094	42.5212	0	0	24.7005	15.0334	34.8091	23.5811	44.3827	28.3731	33.7277	0	67.0412	46.6674	47.3567	32.6063	89.8992	0	20.3015	30.8351	91.515	34.4728	56.1557	32.8284	41.653	39.4272	49.3839
Coasy	0	284.225	131.558	0	150.113	111.613	0	86.2234	156.244	130.723	74.0729	114.982	59.5097	7.56438	71.1651	68.9718	77.292	86.1903	218.56	243.976	50.5469	68.6753	96.8471	55.2315	0	72.6672	72.4135	87.0923	111.886	71.0392	75.5272	229.016	93.2208	106.909	72.6938	57.5647	31.1002	0	180.79	70.9688	88.4769	53.6175	26.8666	91.1621	65.2855	86.4238	92.9766	96.9451	79.6522
Cobll1	0	272.305	0	0	0	0	0	0	0	0	38.745	37.7282	58.1213	0	0	68.4335	116.026	63.7154	209.362	0	172.807	189.587	116.264	60.0779	116.791	236.386	60.0804	0	59.6377	74.0842	81.5012	72.7512	99.4542	23.6366	0	0	0	0	0	0	0	0	0	0	0	0	0	0	177.078
Cog1	0	0	0	0	0	0	0	0	0	0	18.6102	27.7289	28.132	0	121.342	73.8589	12.9278	48.2525	0	0	52.6407	0	48.1043	33.1322	0	0	10.3983	0	0	0	43.7157	0	57.1368	28.8418	8.72125	14.3664	0	0	0	0	16.6126	73.6425	58.908	0	171.1	0	112.8	49.4791	0
Cog2	0	0	0	0	0	0	0	0	0	0	52.4193	3.12425	43.3501	0	67.6949	69.533	14.3728	20.8656	100.545	70.74	99.5483	92.832	18.9171	19.7049	0	0	9.82549	0	0	0	132.395	62.5685	88.4416	118.898	38.786	0	0	63.8478	0	0	46.2107	93.098	126.466	102.484	175.598	73.5608	225.264	115.837	0
Cog3	0	0	0	0	0	0	0	0	0	0	5.28277	38.3047	41.0245	0	75.3107	84.8509	32.4531	5.67177	0	0	57.7849	115.494	229.77	20.5388	0	0	0	0	0	0	52.9374	0	0	0	10.5925	15.5934	10.8916	0	0	0	78.8276	46.4193	73.5867	0	33.7944	97.2888	81.3467	129.725	0
Cog4	0	0	0	0	0	0	0	0	85.0678	0	0	0	0	0	75.2317	85.1154	0	6.27405	0	0	125.021	0	26.3578	34.0013	0	0	0	0	0	0	39.584	18.9962	0	73.4242	0	0	34.4284	59.6824	0	0	59.6702	12.1161	61.1723	151.197	118.289	110.744	128.706	61.7945	0
Cog5	0	0	0	0	25.4377	0	0	0	0	8.49382	35.0665	30.5848	47.4709	24.278	39.4907	89.4271	24.0812	17.2696	21.3045	0	112.296	73.6037	26.2539	0	0	0	42.335	6.20189	71.6877	0	46.8188	47.4592	32.7479	94.4543	0	0	64.5232	0	0	0	37.4643	65.9226	79.4671	99.5774	86.4129	37.136	148.316	72.2458	0
Cog6	0	0	0	0	0	0	0	0	0	0	18.686	30.8224	9.89199	0	29.3998	14.9299	21.043	18.0205	0	0	0	0	4.46477	0	0	0	0	0	30.696	0	0	0	85.7341	0	0	0	0	0	0	0	24.0651	20.5107	0	55.7175	63.7599	59.067	28.5168	44.1772	0
Cog7	0	0	0	0	0	0	0	93.4114	32.6346	56.359	45.1621	89.9874	50.9461	0	15.3343	19.5373	108.741	67.5213	81.2363	57.4945	68.6934	52.6855	42.6532	50.1433	0	74.68	59.92	87.0955	0	0	60.7099	14.8689	13.3761	58.6406	59.9239	81.6105	0	0	0	26.3269	97.9864	121.383	92.1218	87.2319	98.8868	69.7622	40.7207	104.508	0
Cog8	0	0	0	0	0	0	0	0	0	0	0	0	0	0	33.7116	37.9881	0	95.3394	0	0	99.1833	0	86.716	0	0	0	0	0	0	0	0	0	0	0	0	0	0	0	0	0	0	24.2612	0	0	0	0	0	0	0
Coil	0	0	0	0	62.3748	78.7125	0	0	0	0	72.6846	24.831	42.9889	126.822	159.18	67.6784	55.1168	80.6455	101.293	0	116.665	21.5097	69.0861	42.4183	0	0	64.5902	0	110.202	107.686	87.5549	82.4935	107.852	49.5139	66.3753	47.3858	137.201	101.954	73.0973	0	46.8591	84.3775	82.3159	133.687	78.588	62.7486	77.2651	43.6289	163.792
Col12a1	585.436	0	0	0	0	0	0	0	0	0	0	0	0	0	0	0	0	0	0	0	0	0	0	0	0	0	0	0	0	0	0	0	0	0	0	0	0	0	0	0	0	0	0	0	0	0	0	0	0
Col17a1	0	0	0	0	0	0	0	0	0	0	0	0	0	0	0	0	0	0	0	0	0	0	0	0	0	0	0	0	0	0	0	0	0	0	0	0	0	0	0	0	50.1446	0	0	0	0	0	0	0	0
Col18a1	66.7515	0	0	0	30.5321	40.4244	0	0	0	0	0	0	0	0	0	0	0	0	0	0	0	0	0	0	0	0	0	0	0	0	0	0	0	0	0	0	0	0	0	0	0	0	0	0	0	0	0	0	0
Col19a1	120.269	0	0	0	0	0	0	0	0	0	0	0	0	0	0	0	0	0	0	0	0	0	0	0	0	0	0	0	0	0	0	0	0	0	0	0	0	0	0	0	0	0	0	0	0	0	0	0	0
Col1a1	151.052	0	255.152	491.174	244.2	152.804	0	0	0	0	14.6992	47.7733	16.9702	0	0	0	0	96.9994	0	0	0	0	0	0	0	0	0	0	89.9697	0	0	0	0	0	0	0	115.281	152.741	0	0	0	0	0	0	0	0	0	0	0
Col1a2	85.4301	0	0	0	136.794	73.298	0	0	0	0	46.0167	31.9306	0	0	0	0	0	0	0	0	0	0	0	0	0	0	0	0	0	0	0	0	0	0	0	0	0	0	0	0	0	0	0	0	0	0	0	0	0
Col2a1	187.621	0	0	0	0	0	0	0	0	0	0	0	0	0	0	0	0	0	0	0	0	0	0	0	0	0	0	0	0	0	0	0	0	0	0	0	0	0	0	0	0	0	0	0	0	0	0	0	0
Col3a1	298.924	171.912	245.966	0	217.278	111.39	0	0	0	0	102.17	92.1144	30.1092	56.748	83.3529	131.047	37.7193	50.5653	0	0	0	0	0	116.32	0	0	70.7435	88.7336	113.15	89.7085	0	0	0	0	0	0	0	0	0	0	0	0	0	0	0	0	0	0	0
Col4a6	0	0	0	0	0	0	0	0	0	0	0	0	0	0	0	0	0	0	0	0	0	0	0	0	0	0	0	0	0	0	0	0	470.451	0	0	0	0	0	0	0	0	0	0	0	0	0	0	0	0
Col6a1	76.147	0	115.469	0	124.156	117.897	0	0	0	0	0	0	14.7456	55.2094	0	0	0	0	0	0	0	0	0	0	0	0	0	0	147.688	81.0605	0	0	0	0	0	0	0	0	0	0	0	0	0	0	0	0	0	0	16.7498
Col6a3	337.969	0	643.114	0	417.993	143.252	0	0	0	0	0	0	165.289	0	0	0	55.6039	0	0	0	0	0	0	0	0	0	0	0	65.6558	136.106	0	0	0	0	0	0	0	0	0	0	0	0	0	0	0	0	0	0	0
Col6a6	0	0	0	0	0	0	0	0	0	0	0	0	0	0	0	0	0	0	0	0	0	0	0	0	0	0	0	0	0	0	0	0	0	0	0	0	0	0	0	0	0	0	0	0	0	0	125.691	0	0
Colgalt1	0	0	0	0	0	0	0	0	36.3047	78.4087	52.4017	54.2299	129.313	55.961	96.9933	187.103	38.2999	83.211	82.667	24.0254	37.1041	70.4481	96.084	119.759	31.7904	47.8963	99.7187	68.4117	95.6837	133.324	89.7075	66.0399	101.921	117.181	166.411	132.493	103.16	29.4253	94.7438	21.4358	82.8757	114.269	207.369	129.393	156.406	170.819	232.509	141.495	46.9514
Commd1	0	0	0	0	0	0	0	45.0986	0	0	28.3034	23.5114	6.34798	10.6613	18.6125	17.4406	23.6161	0	0	0	39.3449	0	12.183	40.2322	20.8144	25.7628	0	11.5263	0	15.8484	0	0	0	0	0	0	32.0906	62.9734	0	0	0	7.09451	0	6.33616	14.4762	17.8923	0	36.5208	0
Commd10	0	0	0	0	13.4854	0	0	0	29.9981	34.4311	0	0	6.76724	0	20.5261	25.3818	77.3472	14.9065	0	65.251	0	0	0	0	0	0	0	0	0	0	26.5909	0	0	0	45.0544	0	0	0	0	0	20.7908	0	0	0	0	0	0	120.457	37.6394
Commd2	18.181	0	0	0	0	0	0	0	0	0	40.4529	18.9823	0	0	74.7146	59.8723	56.9224	31.921	0	0	53.0698	33.4841	20.7273	29.3123	0	0	26.2747	0	25.5366	22.6461	0	23.689	46.6635	0	26.5448	10.6871	0	0	0	46.0693	31.7335	18.9556	40.3869	16.8116	27.3831	61.5738	23.9455	70.2487	0
Commd3	95.876	0	0	72.8882	169.467	183.879	156.072	181.267	153.349	68.253	110.631	105.892	99.5083	111.108	97.6239	156.047	116.967	93.0107	59.3695	155.874	64.7636	276.716	149.64	107.057	126.753	62.4473	124.542	133.242	240.548	202.948	144.566	78.0633	94.6059	46.9702	81.5499	86.7949	146.192	168.43	46.009	142.935	77.9909	114.628	72.0419	95.833	161.137	122.25	139.66	90.326	0
Commd4	0	0	0	0	0	0	0	0	0	0	0	0	0	0	0	0	0	0	0	10.4114	0	0	19.8552	15.1393	0	0	0	0	0	0	0	0	0	0	0	0	0	73.5542	0	0	20.9052	36.0634	0	0	17.3867	39.8026	0	58.8367	0
Commd5	0	0	16.5379	0	0	0	0	0	12.7259	0	0	0	6.87246	0	47.9987	46.2299	0	22.7454	0	0	85.3515	67.8363	0	0	0	0	0	0	0	0	17.5797	0	36.9364	0	0	0	0	0	0	0	0	0	0	0	17.7241	4.50667	0	13.5872	0
Commd6	0	0	0	0	65.6052	44.7822	0	0	0	0	21.0267	56.8087	0	0	0	0	55.1585	91.8621	0	0	0	0	48.8805	36.9769	0	0	26.9919	26.1124	79.0581	35.3998	18.7991	0	0	13.8699	54.4949	45.4486	0	0	0	0	42.1608	76.0699	99.8152	50.2611	65.7453	19.6746	0	31.3849	33.3246
Commd7	0	0	0	0	0	0	0	0	0	0	0	0	14.647	14.746	26.7047	46.5074	0	0	0	0	0	0	0	0	0	0	0	0	0	0	0	0	27.1842	0	0	10.6114	0	0	0	0	18.2472	0	0	0	0	0	29.9246	0	0
Commd8	0	0	0	0	0	66.5974	0	0	120.379	49.7573	90.3774	82.322	22.1455	14.9929	51.9341	78.8294	66.7365	41.087	46.8122	102.443	31.7003	21.4752	49.0263	44.2266	0	0	72.3959	29.864	0	0	33.692	56.9125	33.7581	62.0071	55.2823	51.6077	0	50.2481	16.8932	0	38.4432	53.0736	128.288	55.3269	81.936	95.1433	132.507	93.5981	0
Commd9	82.1273	45.0357	79.1665	95.0413	38.9273	53.1774	74.1805	115.155	55.2266	68.3213	58.4979	42.76	114.719	101.578	92.2378	115.574	108.533	94.5311	222.867	26.8984	110.002	358.115	79.2475	81.4456	25.3853	0	51.5697	18.7839	58.6969	25.2584	151.645	179.345	156.389	115.005	51.3787	42.4226	54.2686	0	99.3541	89.2034	55.4474	100.402	52.7837	68.7454	145.797	67.1586	97.3453	116.997	64.4572
Comp	250.041	259.995	280.84	161.53	430.429	121.07	0	70.6153	0	251.429	92.2478	25.4205	81.5379	58.3854	22.8641	0	18.1063	20.5397	0	0	0	0	0	33.5979	0	0	73.3643	51.444	135.248	108.627	0	0	0	0	0	0	26.8694	0	0	0	0	0	0	0	0	0	0	0	0
Comt	284.313	252.99	472.875	98.1141	190.551	226.555	101.691	130.982	186.48	148.19	178.322	194.725	103.597	63.9321	230.776	228.014	195.178	119.136	51.0522	172.954	439.331	354.484	251.118	182.741	109.72	136.112	90.6389	91.0417	132.919	80.9635	68.4716	66.829	180.865	113.38	103.67	81.9548	74.4777	30.2367	203.931	105.896	92.1331	89.195	26.5941	68.6593	90.2427	112.187	112.971	66.7508	156.941
Comtd1	0	0	0	0	22.4926	0	35.5994	53.1063	0	42.6241	15.1623	0	16.7802	35.1634	74.7145	21.604	25.9591	27.5039	21.9226	59.8113	70.359	42.6489	22.3956	19.8297	0	0	0	0	0	0	12.4087	21.8389	30.4776	29.4706	0	8.4034	0	71.9073	22.4905	86.6507	84.7639	24.6576	0	42.503	7.4772	63.4838	18.3947	47.8066	42.7091
Copa	96.0839	735.389	538.94	1347.54	320.325	425.989	464.245	467.501	534.882	412.222	496.776	445.704	207.597	711.312	325.083	292.9	414.846	453.234	668.393	640.094	314.942	306.14	424.481	430.32	356.132	390.527	589.918	500.448	613.681	617.052	484.234	702.129	815.434	654.639	427.471	462.441	764.238	598.212	579.265	656.055	500.076	534.856	932.929	862.393	826.991	699.75	656.119	683.343	642.628
Copb1	305.946	456.398	334.045	445.712	256.113	322.293	487.15	467.093	408.393	399.833	275.07	341.243	434.022	506.42	346.285	353.547	298.657	334.136	553.756	407.858	314.872	470.393	271.193	235.841	502.229	560.724	305.319	348.906	344.694	312.714	427.108	338.651	374.753	455.975	198.883	284.296	569.846	516.332	556.987	561.36	353.12	273.014	641.103	783.092	498.688	435.89	537.027	520.461	254.599
Copb2	121.891	284.512	272.075	0	501.794	157.204	334.122	301.279	268.827	244.011	233.148	255.28	154.737	154.43	236.49	219.514	238.943	236.944	282.929	198.099	137.458	279.553	207.935	252.756	246.138	194.383	216.535	315.509	382.793	429.971	342.439	212.082	183.126	305.297	155.402	211.973	308.478	324.015	227.354	312.46	181.84	162.877	427.95	388.222	337.036	462.541	199.485	383.052	135.246
Cope	214.778	81.995	96.7481	237.279	196.772	176.006	70.4701	195.658	226.559	262.985	200.006	175.505	163.537	100.911	318.953	290.866	199.904	191.095	165.737	188.226	213.651	285.7	180.173	244.681	284.081	265.424	197.986	211.59	100.443	169.05	222.112	279.826	151.975	193.653	205.866	299.849	206.267	246.71	169.282	257.519	200.343	162.455	178.617	207.867	217.305	217.175	222.074	236.603	71.7691
Copg1	73.5251	107.073	69.5369	0	109.983	104.397	161.233	163.084	264.779	171.712	278.241	295.057	123.14	129.803	178.661	275.683	213.706	296.2	301.538	285.169	410.27	295.757	261.229	286.036	265.362	136.214	204.384	154.878	93.5198	195.466	353.762	237.942	253.197	305.983	217.024	269.955	187.856	255.067	436.391	332.159	267.482	284.088	432.382	422.753	483.577	482.493	457.89	388.375	219.36
Copg2	0	0	0	0	0	0	0	73.5474	86.2249	82.6362	110.852	116.975	109.71	174.15	301.155	193.196	139.696	144.097	161.11	162.354	224.553	263.934	141.499	148.585	127.578	82.3974	96.9008	101.484	102.959	51.4445	264.006	107.903	18.7609	192.545	92.6093	139.298	85.3548	73.2472	69.8232	0	74.3551	138.84	243.494	152.291	129.142	160.144	190.59	155.584	161.623
Coprs	0	0	0	0	0	0	0	0	0	0	0	0	0	25.8756	0	0	0	0	0	0	0	0	0	0	0	0	0	0	0	0	0	0	0	0	0	0	0	0	0	0	0	0	0	0	0	0	22.9332	0	0
Cops2	147.221	523.282	313.956	628.685	374.922	393.436	399.836	354.869	381.179	309.074	281.154	320.531	169.706	179.335	268.058	218.719	251.511	236.381	187.091	242.298	341.823	248.409	238.326	191.814	312.815	197.519	291.508	237.825	170.725	316.86	179.331	301.058	245.547	290.007	250.706	217.758	353.406	370.608	301.713	290.194	222.383	199.93	189.674	178.917	200.737	246.625	273.791	204.993	346.62
Cops3	81.3747	73.477	92.9111	0	196.555	157.38	113.145	142.848	185.489	244.687	306.459	295.641	307.178	212.92	256.784	298.092	269.699	294.816	349.419	128.062	97.0253	143.738	264.706	234.832	274.514	163.652	249.145	217.879	147.312	75.8811	307.238	337.156	255.779	305.687	189.661	224.628	304.404	220.68	214.28	229.56	365.141	389.466	214.158	152.391	176.284	127.885	126.544	147.19	208.623
Cops4	866.594	598.561	768.828	923.964	773.927	839.636	698.569	408.722	662.713	759.881	457.141	423.36	360.965	535.426	632.806	645.345	607.227	639.46	371.443	525.585	785.433	751.069	494.127	589.338	385.025	475.261	549.865	533.008	616.067	758.447	520.53	572.822	690.782	437.646	491.181	466.802	460.867	551.702	765.126	676.253	538.497	595.61	470.025	436.307	517.472	458.768	503.326	534.298	585.741
Cops5	100.23	124.16	74.7908	119.912	35.9473	124.568	81.6551	64.8125	113.746	98.8875	128.959	116.244	201.821	91.0037	100.867	82.1226	123.457	114.67	114.872	136.791	118.959	177.206	171.536	91.872	101.745	86.3265	62.9558	180.94	133.766	140.606	135.443	124.518	197.415	194.305	73.2624	84.4242	46.0344	105.327	0	40.5607	149.676	254.154	185.166	133.198	129.001	105.052	170.392	173.722	137.052
Cops6	117.178	293.911	182.586	520.84	185.437	225.919	107.795	15.3955	238.27	184.484	109.09	146.832	69.7732	74.3721	265.694	203.605	148.198	172.493	103.548	186.17	224.93	112.987	134.561	149.1	137.279	164.309	156.313	118.336	77.2617	136.032	188.199	118.733	141.505	156.867	84.4332	135.028	127.657	67.8594	140.878	181.976	137.124	110.867	135.349	176.699	218.286	220.613	222.353	218.675	53.1802
Cops7a	83.8376	236.893	79.073	263.953	142.297	193.29	135.246	164.862	184.832	133.138	134.987	155.876	73.2183	87.3009	106.367	62.9668	92.7399	94.2635	0	123.307	95.9093	83.9959	149.621	104.623	148.466	85.3005	166.219	207.615	237.361	185.3	80.8854	64.7422	184.589	81.2249	119.119	158.944	187.618	205.875	234.83	232.564	109.251	38.5955	94.6935	160.074	55.3464	93.8831	246.684	79.2859	177.676
Cops7b	101.421	149.203	199.61	0	40.9495	115.941	71.6552	35.3253	102.47	89.7896	102.013	109.241	45.1698	88.1587	85.1587	107.92	65.4476	95.8361	124.5	94.2219	210.401	176.411	72.6206	72.9975	38.3666	50.5823	31.5733	62.8687	55.9507	45.1483	114.42	79.4887	146.422	98.9312	29.6423	76.3986	49.3719	63.5015	106.83	75.9217	34.9643	52.2293	0	51.5057	46.0266	69.6499	84.4358	47.7814	103.555
Cops8	248.202	238.426	112.155	0	96.2137	176.79	63.906	59.4778	76.1781	82.6326	208.078	165.858	185.179	207.122	119.594	153.526	198.628	169.39	76.6175	34.7076	53.8473	50.112	139.765	190.909	113.67	226.835	168.321	249.407	258.922	165.266	124.493	15.3645	118.415	123.747	135.89	105.174	118.45	17.9042	50.9258	215.156	118.164	149.479	44.4384	93.7007	91.497	95.5038	173.073	136.939	252.322
Copz1	60.7937	0	146.497	0	26.6205	77.3837	0	0	100.055	128.218	142.587	107.459	68.0903	100.007	91.7413	109.48	38.3325	92.1622	105.15	73.7361	26.7208	60.3069	87.9253	113.339	172.959	15.8245	45.1006	50.7845	64.6624	56.0714	97.4486	112.52	60.5778	69.4291	117.477	141.552	202.62	113.852	0	0	74.3574	125.447	67.7265	119.071	109.829	129.937	80.2564	96.3478	0
Copz2	0	0	0	0	0	0	0	0	0	0	6.10952	0	8.25602	12.7028	0	0	0	0	0	0	0	0	0	0	0	0	0	0	0	0	0	0	0	0	0	0	0	0	0	0	0	0	0	0	0	0	0	0	0
Coq3	172.54	182.442	281.364	0	122.368	85.6605	87.2286	138.242	113.418	125.453	63.4788	98.0017	73.7907	49.5378	68.9594	102.47	38.0976	74.1365	89.688	112.228	70.8005	73.1982	52.3055	56.64	76.7503	110.296	49.8348	76.6218	115.61	68.2523	57.3452	48.6275	64.2368	29.4791	93.6621	80.9921	73.8995	157.436	68.7594	177.824	92.2817	69.8579	51.9508	57.1212	68.4466	97.2525	72.4234	39.0597	232.399
Coq4	0	170.995	0	0	181.103	168.319	98.7816	55.7615	160.495	195.643	52.1594	56.3873	28.6338	37.7224	36.4363	18.4535	107.059	79.7381	85.0456	175.573	0	31.4701	58.8563	73.6728	0	0	48.639	68.8167	135.478	132.354	57.0886	39.8765	117.023	52.2255	86.4486	99.473	54.8204	41.5556	0	0	74.0237	65.0239	93.063	86.0961	86.8003	53.4362	86.4566	47.0413	61.6678
Coq5	35.6102	0	0	0	185.082	88.8908	109.233	67.0102	139.741	193.345	142.614	124.216	68.9702	0	140.544	128.468	141.6	184.343	42.4578	70.0479	142.883	81.4263	112.24	103.543	0	0	50.8247	33.3265	124.381	80.2661	78.3475	0	149.532	0	118.418	99.0675	59.2258	54.2381	0	0	76.9006	118.553	0	100.95	148.158	78.7635	82.8824	85.7597	64.2125
Coq6	0	0	0	0	169.226	305.634	0	76.3277	44.3679	17.6677	49.3052	41.5879	12.5721	0	13.268	30.9821	89.9956	60.7612	0	20.6091	0	77.6791	57.8489	62.2078	0	0	31.8896	0	67.9092	16.2443	16.3412	4.75341	0	0	68.0604	91.4345	40.1173	0	0	0	153.397	75.415	0	0	0	11.4508	23.2333	69.1407	26.1052
Coq7	0	0	0	0	0	0	54.0865	28.8836	52.1331	29.012	10.8009	11.2169	0	0	61.7962	70.6137	0	5.34892	0	0	47.9364	43.6897	31.1004	23.1049	0	0	0	21.8161	0	0	0	19.9457	23.2235	0	5.80718	0	0	9.48778	0	0	30.0325	13.289	0	18.913	22.3721	11.2897	31.5204	39.0907	20.3692
Coq9	237.627	96.2687	34.1436	486.328	58.6653	44.4933	29.6027	104.114	88.9343	109.402	118.087	101.686	28.8941	29.0922	54.0328	45.6088	58.9339	41.2671	0	56.4095	92.8585	81.7806	62.764	109.577	0	0	31.6812	14.0806	19.6803	25.7326	52.7626	31.3263	0	26.5478	76.7523	62.2786	67.8651	61.5064	0	0	116.782	85.719	62.9723	49.3576	27.9336	42.0956	13.0147	99.0457	196.714
Corin	0	0	0	0	0	0	0	0	0	0	0	0	0	0	0	0	0	0	0	0	0	0	0	0	0	0	0	0	0	0	0	0	0	0	0	0	0	0	0	0	0	0	0	0	0	0	0	0	0
Coro1a	367.276	1037.18	725.212	1510.1	1196.78	1029.93	1038.55	1230.85	1293.98	1331.23	1318.76	1205.92	717.625	667.21	1253.73	999.873	990.989	840.911	1005.52	1399.77	1497.24	1596.17	1493.64	1559.65	1209.64	1315.49	1071.63	1315.18	1025.53	1010.73	1272.78	717.672	647.665	893.843	725.871	831.9	292.679	311.835	69.1523	159.902	239.638	174.619	700.2	548.089	468.117	803.204	514.234	553.078	950.778
Coro1b	210.975	235.537	223.895	225.494	179.392	128.886	143.056	188.963	198.039	115.144	109.868	84.6011	176.864	249.85	192.121	125.552	78.1026	67.4416	160.852	237.223	135.705	148.312	135.272	92.2084	186.084	452.789	147.677	110.378	119.907	146.799	159.562	160.471	56.7798	118.575	95.2801	98.271	318.344	298.224	162.573	114.415	88.1298	79.9634	87.5944	67.751	61.532	130.215	181.275	68.5921	205.087
Coro1c	0	86.395	276.804	0	226.648	225.394	199.422	118.6	189.712	105.117	187.346	189.233	58.2605	113.649	87.1294	132.644	203.531	211.586	204.862	177.683	180.337	106.563	199.293	259.494	169.899	77.4249	219.358	243.048	173.462	195.466	235.164	173.198	181.905	115.877	256.556	267.24	148.358	76.0407	166.164	178.373	223.386	213.694	177.913	183.606	177.047	154.126	117.99	166.273	144.625
Coro2a	0	0	0	0	22.4029	0	131.116	79.0461	0	0	57.114	100.135	94.0252	75.3555	65.6901	65.4338	77.1849	92.3354	187.084	102.791	101.174	46.8442	126.745	122.992	189.956	47.4694	131.008	248.375	50.0267	262.84	136.38	208.211	98.8427	181.493	163.723	142.954	0	0	0	0	0	0	107.581	108.212	110.242	64.0121	0	74.7411	102.08
Coro7	85.8185	488.928	794.979	282.909	658.216	599.338	531.173	575.804	576.859	750.681	780.705	755.53	739.399	568.555	1043.74	696.905	804.09	871.342	752.229	926.13	1248.38	666.766	1104.48	1000.56	908.649	1250.86	1028.61	867.124	1049.88	1326.51	436.348	348.076	618.721	423.371	741.835	472.816	149.659	58.4866	64.0425	162.657	235.663	244.441	438.708	420.241	428.66	539.334	628.206	435.839	742.962
Cotl1	96.8258	327.186	229.018	328.131	272.938	437.606	255.857	340.531	359.894	241.083	273.353	340.712	123.088	130.002	270.448	323.331	240.038	275.493	167.905	337.74	660.294	539.343	445.853	392.572	276.035	280.657	350.346	305.148	381.887	413.971	235.047	71.4356	80.6134	337.164	429.702	301.707	183.116	80.588	74.0912	153.452	164.57	165.277	169.484	140.106	94.5605	226.275	160.099	182.082	120.902
Cox10	0	0	0	0	0	0	0	0	0	0	0	7.71671	0	0	0	0	0	0	0	0	44.2929	28.0288	0	0	0	0	0	0	0	0	0	0	0	0	0	0	0	0	0	0	0	0	0	0	0	0	0	0	0
Cox15	0	0	0	0	0	0	0	0	0	0	0	0	0	0	0	0	0	0	0	0	0	0	0	0	0	0	0	0	0	0	0	0	0	0	0	0	0	0	0	0	0	0	0	0	0	0	0	36.5043	0
Cox17	35.8451	0	2.55439	0	0	0	0	68.9002	0	14.7392	0	0	14.8139	29.8131	7.25796	21.4779	0	0	61.0873	0	17.7171	0	0	0	127.234	59.3781	23.3878	119.231	52.4017	53.59	38.8588	51.4628	52.8692	35.1663	31.2331	21.3022	146.515	106.38	529.513	211.372	115.912	107.143	0	18.2706	24.8268	21.8808	78.8013	31.6812	0
Cox20	0	0	0	0	0	0	0	0	0	0	20.0276	51.0294	0	0	26.0828	34.8304	25.816	23.2377	0	0	30.9152	45.1882	42.5554	36.3029	0	0	31.8042	0	0	54.6885	47.4047	0	0	30.1448	64.8937	58.995	0	0	0	0	103.912	49.6964	42.0411	0	129.345	19.1455	57.1929	47.8556	0
COX3	0	0	0	0	0	0	0	0	0	0	0	0	0	0	0	0	0	0	0	0	0	0	0	0	0	0	0	0	0	0	0	0	0	0	0	0	0	0	0	0	0	0	0	0	0	0	16.8722	0	0
Cox4i1	1000.55	0	175.363	348.759	282.884	336.077	271.307	177.736	358.743	344.485	405.377	363.088	643.669	486.188	425.372	349.474	335.916	363.633	491.705	243.487	419.565	444.069	382.606	359.001	528.171	532.502	443.194	343.739	321.446	324.719	265.531	540.689	196.839	349.825	530.598	524.952	352.933	389.575	626.794	326.162	442.742	421.047	377.164	288.339	204.102	189.939	270.992	431.018	575.97
Cox4i2	0	0	0	0	0	0	0	0	0	0	0	0	0	0	0	0	0	0	0	0	0	0	0	0	0	0	0	0	0	0	0	0	0	0	0	0	0	0	0	0	0	0	0	0	0	0	0	0	0
Cox5a	413.523	223.219	161.899	356.662	148.534	129.601	221.829	312.919	104.339	107.899	185.625	132.08	340.105	240.432	206.318	146.115	129.203	145.269	163.562	217.889	90.5473	113.846	178.116	226.724	307.171	441.13	187.82	136.688	125.09	102.745	115.708	368.944	162.515	156.933	224.26	159.53	243.015	244.289	331.317	387.592	218.772	196.54	246.072	206.699	195.327	209.792	0	296.852	212.991
Cox6a1	0	51.6407	0	0	0	0	0	0	0	0	150.243	170.858	0	0	0	0	32.4936	0	0	0	88.3311	0	118.508	141.751	0	0	0	0	0	0	0	68.8783	0	0	0	133.235	0	0	0	0	0	0	0	0	0	17.3689	0	31.0023	0
Cox6b1	0	0	0	0	189.072	160.266	0	145.005	0	0	112.363	132.87	12.0698	41.0121	0	0	41.4684	62.0041	91.9764	73.2047	0	0	76.1596	60.6906	74.2116	0	116.983	134.851	72.4328	110.183	0	0	0	0	0	32.9036	136.708	84.1252	134.968	217.459	57.3598	33.8592	43.716	99.1055	65.6707	89.4966	0	98.5449	0
Cox6c	0	0	0	0	0	0	0	0	0	0	36.2737	20.7616	0	0	34.6366	34.0665	42.1287	42.9409	0	0	36.9134	0	27.9391	77.6467	0	0	73.5879	0	62.1365	0	28.9792	0	0	0	93.6448	115.642	70.5295	0	0	0	66.7693	58.5313	0	0	0	40.7615	0	0	0
Cox7a2	210.757	166.325	0	265.353	101.678	280.304	161.156	237.426	188.736	216.2	177.861	118.056	252.93	261.51	91.6193	95.3991	350.114	211.103	155.911	258.157	83.8136	21.6114	195.247	252.992	196.217	367.026	268.46	227.125	206.826	122.925	100.048	145.535	43.9592	143.172	306.455	299.786	232.808	330.01	216.49	115.559	240.705	335.864	171.914	104.606	64.2536	109.097	0	291.373	236.619
Cox7c	0	0	0	0	77.7721	33.1564	0	0	0	0	0	58.1168	0	19.238	0	0	0	0	0	0	0	0	0	36.5953	0	0	0	0	29.56	0	0	0	0	0	0	0	28.428	0	0	0	0	0	0	42.5338	0	0	0	0	0
Cox8c	0	0	0	0	0	0	0	0	0	0	0	0	0	27.4012	0	0	0	0	0	0	0	0	0	0	0	0	0	0	0	0	0	0	0	0	0	0	0	0	0	0	0	0	0	0	0	0	0	0	0
Cpa3	0	0	0	0	0	0	0	0	0	0	0	0	24.034	34.1642	137.406	86.738	150.327	204.91	0	0	0	0	0	0	0	0	0	0	0	0	0	0	0	0	0	0	0	0	0	0	0	0	0	0	0	7.53168	0	11.0012	0
Cpb2	0	0	0	0	0	0	0	0	0	0	0	8.49387	0	0	0	0	0	0	0	0	0	0	0	0	0	0	0	0	0	0	0	0	0	0	0	0	0	0	0	0	0	0	0	0	0	0	0	0	0
Cplx1	0	0	0	0	0	0	0	0	0	0	0	0	0	0	0	0	0	0	0	0	0	0	0	0	0	0	30.2237	19.8549	0	0	0	0	0	0	0	0	0	0	0	0	0	0	0	0	0	0	0	0	0
Cpne2	19.2787	106.076	147.774	115.735	139.752	153.885	70.3151	154.227	200.401	306.272	209.567	185.846	132.795	199.576	245.989	173.697	145.025	121.535	62.7732	65.4737	149.151	130.041	117.511	136.521	0	107.86	128.199	188.258	32.1212	91.7272	222.247	137.605	486.558	191.396	44.8063	76.3709	239.577	218.11	213.472	343.739	81.7194	165.536	138.424	243.801	248.938	160.301	408.468	108.243	252.417
Cpne3	179.432	180.859	241.164	0	112.666	188.041	320.193	204.683	240.412	226.017	231.708	189.682	159.348	179.428	206.275	217.463	209.848	258.582	170.391	344.108	138.063	157.57	200.934	275.443	76.8078	116.546	366.831	195.951	372.024	150.852	84.24	79.2743	129.631	170.118	189.359	193.12	0	0	0	0	0	32.7406	210.657	179.58	248.963	165.005	109.1	153.872	129.761
Cpne5	0	0	0	0	0	0	0	0	0	0	0	246.492	0	0	0	0	0	0	0	0	0	0	0	123.471	0	0	0	0	0	0	0	0	0	0	0	0	0	0	0	0	0	0	0	0	0	0	0	0	0
Cpne8	0	0	0	0	0	0	0	0	0	0	0	0	0	0	0	0	0	0	0	0	0	0	0	0	0	0	0	0	0	0	0	0	0	0	0	0	0	0	0	0	0	0	0	0	0	0	0	0	0
Cpox	0	10.1354	92.0407	0	85.4865	85.9825	121.765	53.6754	96.4047	0	89.4585	124.554	113.016	59.7416	84.921	130.526	133.389	102.453	122.44	93.73	0	49.9036	103.505	81.6276	75.1752	88.482	256.425	175.916	0	85.2907	117.06	189.952	18.4284	114.523	86.464	98.9765	522.458	429.355	578.904	438.877	539.398	622.882	63.5334	74.7733	72.5382	49.7642	66.2963	108.547	0
Cpped1	184.207	215.531	152.083	251.965	123.012	239.265	94.5525	88.2358	66.9618	126.189	144.85	132.48	101.644	183.304	72.3639	136.113	126.245	117.87	90.0793	55.9719	64.4919	0	125.907	147.728	0	94.2764	123.235	56.3438	0	43.6316	77.2325	107.791	116.934	104.022	107.787	103.536	87.3304	93.3363	77.7404	191.35	151.604	128.662	72.8495	64.3213	125.696	64.6759	47.0662	100.959	100.838
Cpq	185.695	275.288	151.9	258.861	47.3545	57.5753	129.211	175.289	103.73	116.025	115.923	126.619	117.907	213.892	46.6179	59.4853	126.926	83.8543	93.1376	110.782	105.689	20.6338	80.8973	139.823	44.3851	31.8837	37.3415	42.2903	86.9819	99.3648	62.0587	65.0552	150.214	47.8744	135.472	153.076	97.8246	18.4876	138.276	171.863	88.2344	77.0739	67.7265	71.7621	73.6657	87.4838	42.0704	110.077	165.135
Cpsf1	94.4393	98.38	242.208	99.5445	137.356	155.197	63.6233	183.954	117.992	60.8272	77.2286	128.22	152.882	124.611	134.116	174.129	127.918	191.321	185.186	120.32	263.831	400.304	132.743	191.469	89.5904	47.9319	193.414	198.345	316.796	133.251	211.759	184.884	133.567	158.584	127.51	172.137	126.504	102.917	195.473	95.4921	90.1857	219.409	183.166	169.13	90.9697	175.051	138.49	196.206	111.773
Cpsf2	0	268.63	151.221	0	76.8403	98.7972	194.818	131.937	218.171	208.299	244.72	209.224	144.488	147.274	213.975	273.696	337.192	238.193	289.601	272.29	222.087	285.085	276.945	216.901	66.7982	293.169	171.447	254.017	255.193	334.373	248.491	309.627	434.11	366.318	292.279	369.006	386.451	299.261	173.544	167.032	336.617	375.534	360.164	393.32	362.134	357.905	298.556	314.722	191.138
Cpsf3	120.108	0	0	0	131.61	76.2777	258.806	131.859	128.23	240.431	159.624	167.311	207.149	124.776	138.879	96.2234	67.8788	114.228	138.646	163.191	80.8571	69.4119	104.54	122.663	198.989	138.153	115.521	114.966	146.17	123.66	160.518	136.282	214.901	346.203	162.514	201.961	407.766	322.637	198.169	91.7709	153.881	182.913	232.3	134.306	127.601	109.053	83.4703	107.423	162.58
Cpsf3l	0	0	0	0	0	0	0	0	0	0	0	0	0	0	0	0	0	0	0	0	0	0	0	0	0	0	0	0	0	0	0	0	0	0	0	0	0	0	0	0	0	0	0	0	0	31.4396	0	11.4454	0
Cpsf4	0	0	0	0	0	0	0	0	0	0	79.8426	76.1395	31.4913	11.9334	0	0	70.7774	101.439	0	57.394	62.608	0	57.8308	65.587	0	0	54.9355	72.7729	45.7984	45.7668	67.9176	83.2421	0	131.972	84.198	66.3792	0	0	0	0	131.151	84.2865	112.595	28.4641	31.8539	44.0709	0	83.0409	0
Cpsf6	232.357	305.825	221.029	1756.79	75.4985	86.6991	269.723	294.209	860.009	149.772	209.271	212.992	243.567	111.332	294.733	274.5	200.109	227.166	238.007	313.194	501.641	699.469	224.063	189.599	506.191	342.077	152.106	140.341	151.45	100.876	277.505	383.5	148.147	300.256	270.626	176.873	722.608	276.646	328.366	237.24	176.794	155.222	242.808	108.789	102.783	217.553	151.464	219.182	196.014
Cpsf7	65.5739	202.99	101.545	76.2823	209.673	174.726	132.823	106.369	162.232	142.765	107.684	87.0174	70.1032	106.165	152.408	133.848	66.1563	125.655	106.355	200.36	155.136	132.279	126.194	136.758	132.853	91.841	249.108	236.744	261.494	166.358	171.359	220.506	128.986	175.918	85.9544	134.088	200.647	174.569	166.796	160.802	113.805	98.7604	179.01	154.617	94.5425	145.784	25.8567	82.6663	215.272
Cpt1a	39.2863	53.4807	222.589	0	87.2305	56.1435	91.1389	91.9402	26.8694	40.2508	104.763	119.489	115.22	36.6264	122.488	145.507	103.479	107.029	240.68	33.1318	134.959	174.598	94.1636	135.495	0	8.91929	61.1155	64.5159	112.687	122.006	123.821	84.8176	61.0975	111.267	65.8601	101.17	64.065	146.552	0	17.5452	42.177	32.0841	113.221	77.7124	155.558	111.831	116.113	56.1969	204.891
Cpt1b	0	0	0	0	0	0	0	0	0	0	0	0	0	0	0	0	0	0	0	0	0	0	0	0	0	0	0	0	0	0	0	0	0	0	0	0	0	0	0	0	0	0	57.7312	0	0	0	0	0	0
Cpt2	0	225.79	0	0	289.778	225.697	65.2199	116.399	138.992	200.573	282.579	253.44	100.135	48.7522	110.175	226.715	310.14	246.61	145.721	172.828	122.317	168.12	203.747	145.688	0	0	0	35.2488	200.142	138.697	145.245	102.312	67.8815	69.6467	57.1019	219.107	183.225	85.8564	0	212.909	186.418	334.68	60.7415	23.8065	100.981	74.814	55.0398	100.306	221.061
Cr1l	181.3	84.5368	97.5544	130.898	170.303	205.536	50.7663	229.806	71.627	87.1904	185.475	152.399	66.7142	85.2365	116.447	108.248	89.9853	102.195	87.9704	48.0054	119.366	57.4166	78.4528	68.581	29.7213	0	67.7933	88.5192	7.95405	23.9787	45.4689	12.1482	29.2001	44.6101	48.0925	52.2468	46.2451	58.3093	0	0	50.3987	38.4751	64.0897	0	8.93302	38.3888	34.4539	32.5967	122.04
Cracr2a	0	0	0	0	0	0	0	0	0	0	0	0	0	0	0	0	0	0	0	0	19.343	0	0	0	0	0	0	0	0	0	0	0	0	0	0	0	0	0	0	0	0	0	0	0	0	0	0	0	0
Crad	0	0	0	0	0	0	0	0	0	0	0	0	0	0	0	0	0	0	0	0	0	0	0	0	0	0	0	0	0	0	0	90.8172	0	0	0	0	0	0	0	0	0	20.5169	0	0	0	0	0	0	125.516
Cradd	0	0	0	0	0	0	0	0	0	0	5.3595	20.0348	15.6009	0	51.3747	30.1434	20.5741	12.3116	0	0	49.773	0	22.747	10.3748	0	0	0	0	0	0	0	0	0	0	3.77216	12.3389	0	0	0	0	35.1461	15.9811	0	0	0	0	0	10.7102	0
Cramp	142.668	0	0	0	74.8466	0	53.2605	31.1835	0	0	134.504	89.461	130.703	111.525	39.4625	55.4146	103.978	92.6402	52.6774	27.969	0	0	108.905	85.291	0	730.975	0	0	179.957	123.153	57.8139	89.59	25.7662	110.476	128.092	173.814	120.954	166.557	25.4558	0	189.122	264.938	18.5533	0	61.3388	45.8856	0	17.453	116.255
Crat	0	0	0	0	186.426	136.483	0	0	0	0	59.1266	6.20658	16.4711	0	0	28.8076	47.9644	67.979	0	0	0	0	14.4214	81.2939	0	0	0	24.6136	0	20.0964	3.63625	0	0	0	33.0923	27.2183	0	0	0	0	74.1296	55.41	0	0	0	38.3472	0	21.0762	82.0752
Crbn	0	0	0	0	0	0	0	0	0	0	0	0	15.8391	0	29.4028	38.6133	0	0	76.7072	0	0	0	0	6.13387	0	0	0	0	0	0	36.3696	71.3414	0	44.4396	0	0	0	0	0	0	0	0	44.3405	34.8961	67.4012	57.242	84.0887	0	0
Crcp	0	0	0	0	0	0	0	0	0	0	0	0	0	0	0	0	22.142	0	0	0	45.1342	80.4798	18.5205	13.5452	0	0	0	19.1463	0	0	0	0	0	0	0	0	0	0	0	0	25.3759	15.7929	0	0	0	18.068	32.6836	13.6435	0
Creb1	147.24	195.906	135.153	222.361	144.983	159.846	120.547	174.571	167.021	237.422	109.765	138.828	136.038	79.7162	76.7421	85.1723	88.4057	123.513	121.637	126.887	10.7125	9.10383	67.2129	94.3047	213.972	296.816	142.404	126.803	126.887	75.4656	121.807	207.942	25.5267	144.075	156.444	164.395	217.065	92.6335	80.7173	72.9706	108.657	65.8517	208.456	109.191	132.975	114.909	78.9216	46.2747	113.099
Creb5	0	0	0	0	0	0	0	0	0	0	0	0	0	0	0	0	0	0	0	0	0	0	0	0	0	0	0	0	59.802	0	0	0	0	0	0	0	0	0	0	0	0	0	0	0	0	0	0	0	0
Crebbp	0	0	0	0	42.9658	0	79.3987	107.924	132.967	139.793	92.7493	149.989	220.466	282.312	165.049	293.163	241.585	214.187	263.568	87.1268	302.257	247.119	180.363	199.704	48.588	147.47	306.434	344.455	405.772	247.874	274.379	225.257	160.675	185.657	222.916	219.027	196.601	0	477.85	276.072	294.041	418.751	242.853	175.215	190.175	273.681	388.156	227.27	203.159
Creg1	15.2653	0	0	0	77.6726	89.6488	0	0	0	0	36.7301	31.9037	24.5429	0	12.8326	9.78623	72.1383	77.9901	0	0	0	0	29.5784	50.2765	0	0	48.2367	98.6396	86.7772	104.336	51.4176	0	0	0	93.4097	97.9344	0	0	0	0	100.525	73.4558	15.3328	114.827	59.8698	191.311	71.6065	97.9967	144.639
Creld2	0	0	0	0	0	0	0	0	0	0	24.5306	151.861	18.5868	0	0	0	26.55	27.4636	84.3807	0	0	0	32.5243	46.9024	0	0	77.8836	47.8349	0	0	208.003	63.0564	0	24.1498	32.7413	23.2085	0	0	0	0	70.8055	31.6362	108.84	167.619	84.6007	47.8466	231.904	70.4366	0
Crip1	0	0	0	0	40.1571	0	31.7991	97.0458	0	0	140.364	191.977	0	0	71.7164	95.1485	192.901	147.339	125.38	237.877	170.282	188.04	254.028	224.098	490.1	669.362	434.071	317.987	83.4546	83.9189	73.2095	237.186	0	357.489	56.4486	62.1257	181.942	27.6684	0	0	136.056	143.93	90.6891	0	0	11.3498	0	26.6537	0
Crip2	0	114.736	169.766	0	41.196	41.67	0	31.8717	0	0	0	0	0	28.5111	0	0	18.1288	0	0	0	0	52.8878	10.6701	23.5009	0	0	0	0	0	0	0	49.5926	0	0	0	0	147.792	189.901	178.151	86.0894	19.778	50.0053	0	0	0	0	0	0	0
Cript	0	0	0	275.229	0	0	0	0	0	0	0	0	0	0	27.8035	0	0	0	0	0	24.8025	20.8985	0	0	0	0	0	0	0	0	0	0	0	0	0	0	0	0	0	0	0	0	0	0	0	0	0	0	0
Crk	258.674	371.816	270.131	455.196	313.739	358.74	334.863	316.318	196.594	240.83	126.456	115.854	86.8906	135.27	143.377	246.374	146.255	146.394	168.765	153.126	233.906	129.414	108.303	131.655	242.38	165.853	111.44	137.719	104.569	153.285	94.3043	85.6682	159.07	60.7677	74.2169	101.213	136.341	82.7073	78.6677	95.1681	46.4525	53.4508	59.9309	93.151	87.0385	83.2135	95.2525	53.0496	443.455
Crkl	277.554	215.683	339.958	420.407	379	283.57	354.984	438.815	252.713	364.765	220.73	221.11	305.802	233.571	190.667	207.147	305.27	249.989	322.785	301.223	177.515	171.563	322.793	280.129	427.984	339.666	329.67	354.872	421.775	358.757	173.639	308.991	354.242	281.422	197.522	230.895	194.135	174.925	338.691	215.642	183.648	186.516	197.753	204.467	171.191	191.948	205.846	200.453	226.238
Crlf2	0	0	0	0	0	0	0	0	0	0	0	0	3.60691	0	0	0	0	11.0742	0	0	0	0	5.60402	13.2875	0	0	0	0	0	0	0	0	0	0	0	0	0	0	0	0	0	0	0	0	0	0	0	6.46965	0
Crlf3	329.654	550.214	401.111	519.795	397.363	322.124	310.307	315.711	470.1	438.25	264.125	203.92	245.027	242.457	361.712	444.149	139.455	164.276	356.419	342.725	297.629	287.304	236.305	221.468	319.638	498.314	295.091	302.281	298.465	317.026	198.832	394.596	215.724	318.106	108.934	115.945	210.504	175.381	0	99.8923	91.7346	70.757	241.553	138.679	166.322	192.685	267.583	138.975	352.479
Crls1	0	0	0	0	0	0	0	0	0	0	0	0	0	0	0	0	0	0	0	0	0	0	0	0	0	0	0	0	0	0	0	0	0	0	0	0	0	0	0	0	0	0	0	0	0	0	0	0	0
Crnkl1	0	0	0	0	52.2075	170.147	164.546	99.5606	192.639	85.6346	194.275	147.275	81.5012	88.3617	126.729	65.208	146.248	193.384	195.14	227.712	101.376	126.682	203.778	182.069	230.57	147.54	204.76	151.728	174.748	64.3702	131.854	135.064	164.572	243.923	332.86	204.097	170.661	168.571	206.714	234.315	263.189	271.631	236.569	277.48	183.903	165.068	177.193	238.383	237.208
Crocc	286.697	339.595	530.817	381.125	165.648	319.697	167.881	181.04	222.158	354.25	70.359	131.009	82.9499	87.7729	296.739	359.69	292.533	195.569	0	279.332	341.592	336.575	83.4675	154.334	295.951	534.847	37.9432	157.045	63.7851	136.982	110.325	0	89.9154	63.0073	52.4261	81.2664	167.914	0	0	0	17.8906	167.088	0	0	195.807	89.1828	301.55	70.9088	253.289
Crocc2	0	0	0	0	0	0	0	0	0	0	0	0	0	0	0	0	0	0	0	0	0	0	0	0	0	0	0	0	0	90.4682	0	0	0	0	0	0	64.672	0	0	0	0	0	0	0	0	0	0	0	133.023
Crot	0	0	317.653	0	138.52	137.583	0	0	0	106.085	63.0803	71.5102	119.005	0	65.5851	32.6833	56.0592	45.5964	107.292	0	121.922	158.541	73.0365	73.3234	0	0	51.8117	90.1423	894.983	102.264	35.9388	68.584	112.505	82.8126	44.7791	79.591	0	0	0	0	0	65.6865	43.2522	114.611	120.887	74.5507	130.663	41.8552	119.166
Crtap	0	0	0	0	0	0	0	0	0	0	0	0	0	0	0	0	0	0	0	0	0	0	0	0	0	0	0	0	0	0	0	0	0	0	0	0	0	0	0	0	0	0	0	0	0	8.06843	0	18.573	0
Crtc1	0	0	0	0	0	11.0693	0	0	0	0	16.1181	9.351	22.5106	9.26228	0	0	20.8075	22.0375	67.6565	0	0	0	21.4336	15.7438	0	0	0	0	0	0	0	18.6004	0	10.6269	0	0	0	0	0	0	0	0	0	0	0	0	0	15.5495	17.9998
Crtc2	0	0	0	0	0	0	0	0	21.5362	0	0	0	21.185	0	0	0	0	0	144.932	0	48.733	0	0	4.70671	55.6011	54.8012	0	0	0	0	0	58.7182	24.324	13.9226	0	0	0	0	0	0	0	0	0	17.0327	12.3579	0	0	7.55772	0
Crtc3	0	0	0	0	0	0	0	0	0	0	0	14.0944	0	0	19.982	79.4774	18.7626	16.4315	0	0	0	17.4211	0	13.7329	0	0	3.01561	62.7321	0	0	0	14.779	0	10.0744	4.6621	6.97661	0	0	0	0	123.36	63.5702	0	0	0	0	0	0	0
Cry1	0	0	0	0	0	0	0	0	0	0	0	0	0	0	0	0	0	0	0	0	0	0	0	0	0	0	0	0	0	0	0	0	0	0	0	0	0	0	0	0	0	0	0	0	0	20.2589	0	7.54327	0
Cryab	25.7648	0	0	0	35.6666	64.5116	0	0	0	0	0	0	5.06116	0	13.4526	21.8097	0	0	0	0	0	0	0	0	0	0	0	0	0	0	0	0	0	0	0	0	0	0	0	0	0	0	0	0	0	0	0	0	0
Cryl1	77.4164	197.507	154.856	106.116	207.678	217.023	0	15.1683	86.2528	29.5872	148.37	139.817	41.132	15.0636	70.5963	63.1146	121.289	179.954	49.1892	102.83	81.7142	166.794	140.22	107.708	0	0	22.1847	18.0419	38.6923	40.0773	48.7141	28.4426	81.8416	13.1841	22.4115	10.0533	0	20.1738	0	0	0	0	16.5915	0	0	0	0	0	0
Cryz	107.707	357.006	387.274	350.987	317.121	191.517	125.065	138.579	250.375	260.23	117.792	192.187	62.0947	38.708	187.888	135.055	114.848	141.89	14.1082	39.991	162.261	94.7419	51.7806	101.406	0	0	42.2496	0	13.9986	46.5201	66.272	22.5458	154.302	0	34.4917	18.6229	0	17.2969	0	0	39.0478	32.1175	0	35.775	93.1044	21.9717	50.0347	24.0524	149.75
Cryzl1	0	44.2431	0	0	69.8703	0	31.0802	0	17.0204	0	56.2615	63.9354	0	11.7353	57.5359	46.0974	63.6965	53.9803	59.1865	16.3724	18.944	31.7378	11.1197	22.2826	28.7817	0	0	15.644	173.805	66.1192	38.2938	18.0569	37.0418	6.34986	16.2451	35.5975	39.0624	0	56.1372	88.044	29.1532	0	0	0	30.641	33.3179	31.9398	45.7122	0
Cs	179.69	539.565	298.353	691.463	462.8	479.437	518.5	481.203	310.016	316.831	257.887	344.86	271.735	260.51	346.088	296.463	396.155	292.639	501.36	363.529	39.4916	0	350.82	287.617	410.204	335.992	473.029	332.382	415.47	381.808	296.433	358.529	336.202	346.295	374.228	379.465	267.085	277.457	611.865	656.993	410.45	599.167	315.096	358.99	333.868	365.966	66.6622	363.824	366.329
Csad	0	125.229	224.266	0	250.471	170.375	95.1611	145.01	171.26	144.538	106.171	132.821	40.3664	0	0	14.3839	94.6834	85.1395	86.4732	73.4173	0	125.272	81.0769	88.4778	0	0	18.0624	0	0	0	0	0	22.6124	0	0	0	0	0	0	0	0	0	0	0	0	0	0	0	171.857
Csde1	74.7946	0	0	0	155.684	78.2411	338.184	87.5586	138.818	144.293	110.035	150.007	153.853	83.4256	95.3564	108.982	122.583	132.322	548.157	124.395	218.568	214.532	134.19	102.954	318.561	331.767	277.566	322.531	338.64	269.11	408.752	492.704	260.333	449.013	272.652	396.535	635.306	454.646	567.085	416.798	291.879	300.137	557.664	496.499	427.093	414.426	386.927	431.178	141.468
Cse1l	446.506	912.129	700.639	0	1071.02	925.303	710.552	990.865	799.598	789.626	739.001	645.716	714.031	816.781	611.46	642.915	661.952	601.25	998.334	629.331	702.041	527.201	560.652	628.368	506.247	603.243	1029.12	989.531	735.213	851.889	691.038	547.799	591.796	999.31	664.43	675.004	856.147	976.001	667.782	784.964	578.334	533.58	1060.97	568.857	536.611	600.181	672.216	690.488	624.224
Csf1r	0	0	0	0	0	0	0	0	0	0	0	0	0	0	0	0	0	0	0	0	0	0	0	0	0	0	0	0	0	0	0	0	0	0	0	0	0	0	0	0	0	0	0	0	0	0	14.4289	15.174	0
Csgalnact2	0	0	0	0	0	0	0	0	0	0	0	0	0	0	0	0	0	0	0	0	0	0	0	0	0	0	0	0	0	0	0	0	0	0	0	0	0	0	0	0	0	0	52.2342	46.61	47.4511	18.2547	0	29.9202	0
Csk	158.009	457.448	196.834	174.491	316.747	352.588	362.358	280.063	337.531	346.411	248.475	334.412	192.628	251.054	253.093	167.947	286.568	300.227	281.89	334.702	216.559	201.516	263.184	262.182	345.564	540.712	386.057	410.409	400.531	358.587	189.957	324.147	224.001	207.067	307.932	266.059	328.494	192.523	290.429	299.69	325.113	338.004	131.392	144.333	202.982	162.598	206.953	129.699	179.721
Csl	0	0	0	0	0	0	0	0	0	0	0	0	0	0	0	0	0	0	0	34.5363	0	0	0	0	0	0	0	0	0	0	0	0	0	0	0	0	0	0	0	0	0	0	0	0	0	0	0	0	0
Csmd3	467.24	0	0	895.195	0	0	0	0	0	0	0	0	34.0322	0	0	0	0	0	0	0	0	0	0	0	0	0	0	0	174.654	0	0	0	0	0	0	0	0	0	0	0	0	0	0	0	0	0	0	0	0
Csnk1a1	0	0	0	0	24.1966	33.2786	7.74698	0	22.264	31.4441	25.118	18.9877	22.0938	0	0	0	27.2388	36.6185	56.1569	27.1597	0	0	36.6657	23.3297	0	0	60.6558	52.0568	31.0317	96.0984	0	99.0627	20.5139	58.9897	44.5965	42.1346	0	0	0	0	24.7578	35.8974	34.8369	0	0	41.4506	22.103	39.9722	0
Csnk1d	0	0	0	0	0	0	0	0	0	0	0	0	16.0838	0	38.4724	23.268	0	5.74034	0	48.7644	46.1432	65.481	6.73142	8.76607	0	0	18.2996	20.7407	48.8217	49.9759	52.1294	39.3758	55.3178	59.7767	0	8.94343	172.568	113.578	0	51.0702	37.2429	49.2942	77.4487	0	14.9201	51.7985	44.755	21.9495	0
Csnk1e	0	0	0	0	0	0	0	0	0	0	0	0	0	0	30.2272	0	17.8218	0	0	0	0	0	0	0	0	0	0	0	0	0	0	0	0	0	0	0	0	0	0	0	0	0	0	0	0	0	0	0	0
Csnk1g1	0	0	0	0	0	0	0	0	0	0	0	0	0	0	59.201	0	0	0	0	0	42.1387	117.396	0	0	0	0	0	0	0	0	0	0	0	0	0	0	0	0	0	0	0	0	0	0	74.9601	0	0	0	0
Csnk1g2	0	0	0	0	0	0	0	0	0	0	0	0	0	0	0	0	0	0	0	0	0	0	0	0	0	0	0	0	0	0	0	0	0	0	0	0	0	0	0	0	0	0	0	0	0	0	0	0	0
Csnk2a1	524.24	230.904	338.537	335.101	422.26	370.151	367.327	442.125	380.457	399.728	344.163	328.532	397.343	287.054	443.825	372.777	345.439	304.44	376.494	347.652	376.997	292.791	274.999	272.126	322.316	384.019	389.295	402.536	216	226.634	361.489	310.433	382.125	441.18	326.491	369.674	557.556	501.756	689.147	596.056	399.012	335.937	517.229	187.102	194.043	295.706	426.27	352.007	187.002
Csnk2a2	0	0	82.7207	0	126.949	167.062	37.5129	42.3535	63.3947	97.7407	140.157	97.8627	96.6282	92.2071	100.717	105.968	114.397	107.409	152.559	104.197	110.772	171.23	95.0814	110.046	25.1554	22.7385	140.185	124.573	63.4368	93.5375	166.902	81.1148	137.588	100.397	122.043	99.8482	54.3483	71.3301	117.963	115.244	144.502	161.353	136.549	122.682	126.569	144.385	201.733	184.729	40.6145
Csnk2b	103.977	277.657	282.422	194.721	135.854	203.704	127.239	153.104	202.764	201.333	190.006	140.867	148.604	126.613	275.463	285.674	221.519	238.399	163.713	140.402	167.942	191.642	146.777	177.561	216.112	213.097	264.808	225.531	227.693	281.43	242.675	142.791	182.768	216.019	278.929	214.569	188.319	256.411	270.85	154.307	244.712	313.346	177.785	261.028	224.063	160.22	101.829	223.233	133.79
Cspp1	0	0	0	0	0	0	0	0	0	0	0	0	0	0	0	0	0	0	0	0	87.1317	0	48.1757	0	0	0	0	0	0	0	0	0	0	0	0	0	0	0	0	0	0	0	0	0	0	0	0	0	0
Csprs	0	0	0	0	0	0	0	0	0	0	0	0	0	49.5557	0	0	0	0	0	0	0	0	0	0	0	0	0	0	0	0	0	0	0	0	0	0	0	0	0	0	0	0	0	0	0	0	0	0	0
Csrp1	338.502	552.042	439.701	410.603	492.35	429.279	544.978	687.205	605.947	657.985	457.694	491.015	340.271	344.026	302.231	286.735	322.002	342.525	548.255	686.612	301.447	303.723	377.48	346.255	375.638	479.598	612.091	580.381	416.25	428.707	436.491	223.949	567.544	416.485	570.246	556.469	230.721	491.712	563.379	831.091	395.851	325.85	269.997	400.301	362.405	388.862	374.613	226.751	471.651
Csrp2	0	0	0	0	0	96.8458	0	0	0	0	40.8186	36.2111	26.5878	0	15.4907	51.4571	21.6616	75.1498	0	0	18.0977	0	39.7281	37.7477	0	0	50.3256	50.82	52.5539	46.6396	0	0	0	0	25.551	40.679	0	0	0	0	0	0	0	53.1364	68.9135	0	36.4049	30.2073	213.839
Csrp2bp	0	0	0	0	0	0	0	0	0	0	0	0	0	0	0	0	0	0	0	0	0	0	0	0	0	0	0	0	0	0	0	0	0	0	0	0	0	0	0	0	0	0	0	0	0	0	0	0	0
Cst3	0	0	65.2763	0	37.6424	72.0109	107.681	46.9393	73.4513	38.3507	23.2334	0	13.7456	14.7104	40.3192	0	18.4967	25.0705	32.4159	45.4505	0	0	25.0361	22.2093	44.0842	58.5908	20.9783	48.8888	30.9822	68.7419	22.5515	42.3289	29.8657	79.9861	14.3246	23.0343	29.0012	0	0	24.4087	33.1054	21.7262	31.4312	65.6584	90.375	83.0408	78.9032	49.514	87.4586
Cst7	0	0	0	0	0	0	0	0	0	0	0	0	0	0	0	0	0	0	0	32.3061	0	0	0	0	38.4201	89.8567	19.9794	21.6151	21.8851	23.9482	26.2599	0	28.9158	0	59.47	31.6475	0	0	0	0	0	0	41.4256	64.1798	52.7371	60.253	44.8046	84.5824	0
Cstb	232.552	347.629	229.884	743.415	291.276	275.637	208.405	181.518	227.336	267.801	206.313	145.51	159.277	112.282	189.259	149.18	133.93	130.002	32.1405	151.939	61.8946	60.7124	204.33	140.034	174.493	199.433	116.994	137.93	70.7337	113.155	127.816	105.892	130.691	113.124	52.4049	90.2994	106.516	133.045	128.484	69.6066	110.54	89.0525	110.452	178.049	47.8968	70.2821	121.521	77.5569	114.946
Cstf1	0	0	0	0	37.9032	0	0	0	76.5654	0	183.028	113.425	64.164	87.3343	106.578	144.608	123.935	156.68	113.153	0	134.212	129.728	179.519	110.591	0	0	134.545	111.76	86.8018	63.6218	96.0329	22.9915	114.029	99.513	187.665	178.908	0	0	0	0	261.752	305.388	223.085	79.4727	109.166	79.8376	32.753	152.402	206.876
Cstf2	594.245	297.296	337.986	382.29	295.003	294.759	218.635	274.713	326.941	212.194	281.452	309.644	557.987	532.34	195.04	211.228	341.071	261.087	510.825	271.6	181.318	214.015	295.957	381.979	575.496	781.06	403.819	463.788	360.387	452.217	250.504	518.811	274.219	320.76	450.757	419.86	430.372	271.017	402.584	867.307	282.561	283.814	344.504	276.334	210.271	262.003	282.146	280.875	340.351
Cstf2t	0	0	0	0	0	0	0	0	54.0963	31.4547	35.9473	3.76496	45.3621	0	95.8382	59.816	61.0119	72.0075	55.8021	82.5974	29.9685	62.9082	73.2176	48.9269	0	36.9274	68.9698	93.7695	48.0642	159.205	50.7764	56.0076	24.4186	46.2695	41.8676	77.0782	41.9216	0	0	0	95.89	81.8639	36.9862	121.761	110.585	72.2846	47.7281	46.8813	0
Cstf3	150.451	140.963	627.162	0	173.92	282.223	214.058	147.22	316.27	165.503	247.07	223.262	236.849	224.289	416.235	271.068	215.418	257.075	307.483	148.569	157.967	168.359	214.734	195.676	319.058	237.957	247.575	195.767	296.115	326.18	193.602	217.814	229.283	165.765	213.476	254.828	190.579	302.256	188.666	285.083	171.369	277.661	262.829	327.687	211.375	258.034	216.504	212.452	127.356
Ctage5	62.71	0	0	0	0	0	0	230.172	0	0	0	8.11655	159.471	91.0362	72.4924	0	69.2306	36.6868	90.9436	13.6424	113.373	0	37.5122	77.2502	327.199	0	168.053	111.679	150.961	89.851	95.7925	104.973	152.858	31.8115	128.82	83.9245	115.653	35.9013	0	0	148.205	43.0423	92.0967	176.886	154.976	150.499	186.571	181.839	0
Ctbp1	193.303	266.774	268.724	506.028	356.489	98.5027	129.296	187.304	193.151	242.265	256.061	220.421	267.446	226.258	196.434	198.483	227.974	296.305	125.987	248.334	119.996	232.874	258.749	259.001	359.795	315.641	254.067	200.054	137.652	140.869	267.018	176.689	178.835	59.8048	266.685	158.655	359.82	288.4	379.69	314.675	235.796	99.6221	134.306	156.259	93.026	94.6654	48.0659	91.3902	170.552
Ctbp2	62.9937	90.1251	367.179	0	73.7427	180.606	288.282	267.861	282.109	248.545	120.93	128.014	72.1469	23.0379	151.435	118.299	86.1742	91.6408	84.0422	125.888	44.9225	87.6785	59.9568	91.3984	0	0	43.4122	68.4942	0	0	53.7557	77.8843	131.385	153.167	108.879	149.754	8.45819	26.1265	0	217.022	122.23	113.64	31.0948	60.5584	47.8432	85.6333	97.5245	66.3563	35.0138
Ctbs	0	0	0	0	192.278	129.531	0	0	0	0	89.0047	34.6294	13.3794	0	10.2853	0	107.933	72.9313	0	0	0	0	15.5959	29.6011	0	0	0	0	0	88.7862	0	0	0	0	0	5.78018	0	0	0	0	0	0	0	0	0	0	0	59.526	0
Ctc1	12.3235	177.38	109.507	0	46.3822	184.135	89.3445	97.8713	94.1631	65.5802	69.7462	43.508	83.4405	67.3261	96.5745	122.188	74.8565	84.5484	89.9077	103.492	168.296	59.0206	94.0898	175.6	0	93.9386	86.0922	170.924	97.2948	272.238	103.997	76.9941	59.1965	147.018	89.9029	79.3127	26.5584	54.7948	0	0	54.2031	41.0869	36.7144	83.2218	22.9956	19.5799	37.9363	19.7586	93.8152
Ctcf	0	0	0	0	124.66	0	0	0	100.106	132.773	442.276	234.922	90.9851	0	301.467	269.233	284.197	277.799	192.726	288.512	258.759	352.438	225.043	237.294	100.974	72.678	183.127	290.022	361.848	175.592	283.505	312.198	0	310.546	204.212	252.818	146.76	137.108	0	0	264.216	321.648	149.503	164.594	237.791	176.029	0	167.924	0
Ctcfl	0	0	0	0	0	0	0	0	0	0	0	0	0	0	0	0	0	0	0	0	0	0	2.12567	0	0	0	0	0	0	0	0	0	0	0	0	0	0	0	0	0	0	9.02633	0	0	0	0	0	0	0
Ctdp1	0	0	0	0	0	95.2384	0	0	252.023	221.755	192.535	205.744	86.064	130.73	266.872	208.386	166.969	92.4718	323.506	312.983	144.831	319.947	246.64	173.466	160.66	136.915	297.352	228.472	304.363	154.994	324.69	292.191	328.809	211.11	109.556	178.863	173.348	265.101	210.561	507.944	359.98	171.042	236.072	226.095	188.527	178.407	205.232	200.901	212.351
Ctdsp1	0	0	0	0	59.0618	0	0	0	0	0	19.8361	32.5883	0	0	0	0	42.6333	23.8267	0	0	0	0	23.049	13.9901	0	0	0	0	0	0	0	16.9273	0	36.037	0	0	0	0	0	0	0	0	0	0	0	0	0	15.6927	0
Ctdspl2	0	0	0	0	0	0	0	0	0	0	31.4361	24.6224	185.541	0	0	0	58.5635	40.3955	415.12	0	0	0	36.4616	62.4529	186.06	423.228	59.7781	53.6456	71.8523	73.8876	116.354	170.386	92.8782	125.187	44.6512	57.0157	194.02	84.1258	95.5752	109.7	70.1572	77.0137	79.09	0	27.9315	0	94.5065	33.7207	0
Ctif	0	0	0	0	0	0	0	0	0	0	0	0	0	0	0	0	0	0	0	0	0	0	0	0	0	0	0	0	0	0	0	0	0	0	0	0	0	0	0	0	0	0	0	0	0	39.9347	0	0	0
Ctla2a	184.607	0	0	0	0	105.067	17.2881	0	0	0	49.9252	55.2053	122.86	83.6522	16.645	22.0888	41.1524	47.5199	0	0	26.6276	0	33.9824	37.3535	0	0	0	0	0	0	33.8949	0	0	0	41.3285	34.3809	0	0	0	0	0	0	0	0	0	0	0	0	0
Ctla2b	0	0	0	0	0	0	0	0	0	0	0	0	0	0	0	0	0	0	66.6524	0	0	0	0	0	0	0	0	0	0	0	0	23.9652	0	56.5126	0	0	0	0	0	0	0	0	0	0	0	0	0	0	0
Ctnna1	0	0	0	0	0	0	0	0	0	0	0	0	19.4956	0	91.6476	96.5035	79.1106	29.6387	0	0	0	92.1283	1.58126	28.2674	0	0	35.686	55.0857	0	0	77.3759	0	0	38.4235	0	0	166.683	62.8526	28.0064	0	177.121	151.011	14.563	86.9823	54.1174	9.75337	0	73.2531	0
Ctnna2	0	0	0	0	0	0	0	0	0	0	0	0	6.51782	0	0	0	27.502	8.74526	0	0	0	0	0	6.98663	0	0	0	0	0	0	0	0	0	0	0	0	0	0	0	32.0291	32.1216	48.9651	0	0	0	0	77.2941	0	0
Ctnnal1	0	0	0	0	0	0	0	0	0	0	0	0	0	0	0	0	0	0	0	0	0	0	0	0	0	0	0	0	0	0	0	0	20.6625	0	0	0	0	0	0	0	0	0	0	0	0	0	0	0	0
Ctnnbl1	0	83.4566	0	0	24.4203	108.881	25.3927	104.961	286.016	150.633	105.259	126.432	118.071	78.293	211.781	238.678	98.9174	110.06	234.772	221.213	250.743	391.014	148.871	150.411	82.4647	0	95.6372	123.19	268.538	37.6642	147.635	119.755	0	207.724	130.245	172.097	164.579	135.151	0	0	149.211	121.883	169.796	0	83.7301	84.357	0	136.747	114.35
Ctnnd1	0	0	0	0	98.8219	76.7291	116.323	138.55	255.678	178.721	176.27	219.619	57.0686	68.6351	122.539	152.186	314.079	171.686	0	54.0189	83.89	76.5894	112.509	196.982	0	0	0	0	0	0	187.627	216.065	176.289	122.462	175.279	155.152	177.115	98.1581	75.8482	85.0212	242.716	201.142	141.726	92.644	205.008	85.6431	79.4475	172.438	0
Ctps	0	0	0	0	67.0205	0	128.238	153.955	149.4	137.456	103.929	115.388	78.0435	128.323	74.6818	105.446	116.387	64.1127	143.998	177.024	101.086	90.1274	223.279	66.9728	28.2007	53.6779	190.046	297.657	279.025	360.27	147.715	192.31	101.167	204.663	90.5941	84.6726	282.863	203.818	51.4258	32.7611	139.02	129.949	294.61	198.512	256.918	264.402	212.188	161.282	0
Ctps2	0	467.108	394.784	0	427.941	507.299	245.632	309.059	338.113	262.545	158.771	222.796	217.201	299.549	243.562	217.091	214.228	241.259	346.439	343.97	246.758	118.732	215.64	272.197	255.478	294.834	255.21	301.124	371.973	427.431	260.128	320.833	427.967	310.867	172.863	198.43	74.6289	95.4317	253.957	44.1123	156.071	145.373	231.074	411.496	363.352	160.472	316.101	166.534	143.996
Ctr9	0	50.2034	265.84	0	71.6654	80.4525	189.297	310.68	216.22	224.388	184.448	151.493	65.9838	19.1228	247.293	247.256	184.266	181.395	151.098	166.46	313.916	164.027	191.455	210.226	84.1221	123.88	137.453	130.138	249.399	252.354	195.449	93.0923	131.596	182.096	193.737	184.981	137.208	220.861	0	0	247.796	238.905	123.527	153.984	108.707	231.906	154.673	260.492	27.391
Ctsa	15.4652	0	0	0	0	0	0	0	0	0	102.642	79.6168	56.1385	14.4021	67.9179	59.6802	125.046	161.342	0	25.716	65.833	213.525	130.46	97.4194	0	0	125.148	115.982	81.6749	134.549	73.7964	0	0	0	164.347	129.605	0	0	0	0	81.4053	93.969	91.7966	58.9545	73.4411	89.654	82.4407	163.87	70.0514
Ctsb	98.1738	47.1533	64.312	0	236.776	280.279	63.2684	73.4011	125.326	87.8748	205.927	314.415	50.9694	43.4647	65.2848	81.6565	176.244	127.974	48.6994	143.41	115.082	170.585	161.831	160.34	0	0	157.268	141.242	67.6747	86.6106	27.1181	51.8859	97.698	87.1183	176.151	104.747	0	0	60.5573	99.0684	111.923	106.291	139.775	108.604	98.097	133.82	113.646	179.502	356.208
Ctsc	467.902	0	381.382	0	170.32	139.791	0	0	0	0	129.71	79.9754	22.1862	0	53.1488	163.579	80.4372	55.9698	161.287	0	58.9836	0	105.693	64.6942	1366.17	0	85.2225	78.8132	75.1782	130.883	42.6091	150.942	0	73.3761	60.6604	54.7941	0	0	0	0	27.1259	55.0243	29.2841	67.2347	91.4778	57.2288	58.7196	204.432	49.5489
Ctsd	286.397	315.621	143.129	262.407	265.026	126.324	212.724	252.142	226.709	146.528	226.029	185.166	358.508	383.279	144.808	128.39	188.633	235.715	228.217	151.686	132.077	98.802	258.944	243.167	89.4782	78.923	167.629	126.937	201.341	205.3	166.023	130.695	158.509	136.636	244.727	177.765	433.613	187.452	252.9	146.591	210.882	200.972	123.46	197.305	160.565	237.25	81.2798	113.734	284.159
Ctse	0	0	0	0	38.3293	52.7483	0	0	0	0	14.5655	22.4624	0	0	0	0	19.4038	18.6217	0	0	0	0	16.0418	13.2135	0	0	38.8587	78.7009	132.513	138.263	51.6777	0	0	0	0	44.3121	0	0	0	0	26.6688	32.5226	0	0	0	0	0	0	0
Ctsf	0	0	0	0	0	0	0	0	0	0	0	0	0	0	0	0	0	0	0	0	3.25952	0	0	0	0	0	0	0	0	0	0	0	0	0	0	0	0	0	0	0	0	0	0	0	0	0	0	0	0
Ctsg	0	0	0	0	0	0	0	0	0	0	0	0	44.8789	157.648	0	0	0	0	0	0	0	0	0	0	0	0	0	0	29.6811	79.1146	125.895	40.1266	55.6622	21.8926	326.393	406.746	0	0	0	0	0	0	901.906	909.29	586.463	1393.39	350.753	1847.65	0
Ctsh	108.079	0	282.85	0	78.3264	87.8197	0	0	0	104.99	43.113	38.4	13.7375	0	52.0419	30.1145	49.1713	30.3738	0	0	29.3736	0	34.9736	35.2265	0	0	48.7778	69.3851	0	0	0	0	0	0	41.757	16.2582	0	0	0	0	0	0	29.9896	42.0994	26.2893	86.6884	37.0386	46.114	116.417
Ctsl	54.298	0	83.981	0	62.1027	95.3406	0	0	0	0	36.7821	30.2725	36.5514	28.1775	37.8656	0	61.5489	29.2257	18.9472	0	35.4186	0	49.2407	46.9357	0	0	25.6027	0	0	17.1462	38.1705	38.6771	50.4273	20.4494	38.9416	29.574	0	0	44.1898	65.6423	83.6049	126.404	33.842	58.3921	45.1788	52.8007	55.1231	79.6527	82.8265
Ctso	0	0	0	0	0	0	0	0	0	0	0	0	6.9695	11.0303	0	0	0	18.346	0	0	0	0	9.18826	20.3119	0	0	0	0	0	0	0	0	0	0	16.0995	26.5073	0	0	0	0	0	0	0	0	0	0	0	14.429	0
Ctss	0	0	0	0	0	0	0	0	0	0	0	0	24.4984	0	0	0	54.004	45.6751	18.2838	45.6263	6.44725	44.2574	121.05	132.444	42.2963	22.1358	129.635	136.6	181.805	154.159	16.719	0	61.478	26.0731	105.413	34.9099	0	0	0	0	0	0	14.7617	57.0128	70.8241	21.885	45.0184	60.061	0
Ctsz	0	89.038	0	144.901	186.384	101	75.8864	68.611	87.4348	26.3284	103.236	130.966	84.0146	92.0462	65.9225	78.8256	116.17	74.9832	173.953	83.7222	0	23.752	103.394	69.99	94.5975	55.2067	73.5877	80.6858	143.437	126.624	94.8398	0	87.2718	123.416	113.47	214.044	36.8283	118.393	0	307.368	58.9661	61.0581	357.992	208.09	178.767	174.582	112.92	259.823	255.217
Cttn	165.545	174.992	0	45.5821	245.515	231.134	283.779	194.612	217.274	205.41	130.33	159.155	32.8459	58.6896	165.316	34.372	57.1515	32.8356	0	0	0	0	11.017	0	66.1596	22.6953	0	55.6266	90.572	108.177	113.752	91.1724	47.5362	53.2833	24.6681	53.7992	126.945	121.938	110.318	62.343	89.2991	80.9001	0	0	64.2571	25.0452	0	0	348.374
Ctu1	0	0	0	0	0	0	0	0	0	0	0	0	0	0	45.3592	97.1531	0	11.831	40.2885	0	20.2564	48.7916	0	35.4497	0	0	46.8631	143.985	0	0	74.7786	0	0	0	0	24.5171	0	0	0	0	34.1482	13.4454	0	174.546	82.7247	92.6194	0	35.5107	0
Ctu2	0	0	145.815	0	51.4499	31.8802	59.74	55.7095	68.9117	41.9638	58.0395	53.4964	35.8597	73.9294	75.9425	133.468	50.918	59.6	66.8053	127.918	115.548	39.8321	45.6111	48.7939	18.7267	0	60.4746	40.8128	119.621	158.406	136.499	64.6821	123.285	78.1066	31.2986	40.2368	111.117	95.974	0	76.5276	48.4433	58.2834	83.6583	135.728	135.68	93.0988	179.063	45.1276	0
Cuedc2	0	0	0	0	0	0	0	0	36.5695	28.5889	37.5734	0	10.2944	0	36.9816	29.8275	15.607	0	0	56.7796	30.7172	0	0	0	54.5472	91.3158	29.3983	29.9567	45.6068	29.3047	38.5513	0	0	0	0	0	83.515	82.1451	41.5307	79.6524	17.2965	38.1708	0	0	6.21932	28.2702	0	26.896	0
Cul1	66.908	480.153	297.985	0	297.336	237.629	175.878	192.621	230.313	318.008	198.414	182.75	214.404	115.52	299.816	280.836	233.674	263.014	236.258	152.991	169.037	421.272	198.066	219.427	0	0	371.673	262.591	249.091	116.114	308.056	176.359	366.914	386.499	164.658	222.718	191.566	374.098	181.304	68.4988	186.32	242.983	240.731	202.144	209.762	182.557	265.993	191.06	218.017
Cul2	0	0	0	0	171.56	147.501	0	0	0	0	59.5428	51.4064	70.0519	54.6006	38.3941	40.4965	53.0101	82.9275	119.734	71.1889	152.57	125.739	0	14.252	0	0	0	136.464	0	0	113.997	98.5384	0	62.9579	99.3419	30.0892	0	39.6075	0	0	63.6721	37.2413	144.986	110.556	73.2123	114.945	33.5431	131.846	22.7562
Cul3	0	334.21	413.847	0	431.328	437.286	299.224	272.957	302.107	331.485	281.114	255.238	92.9676	191.477	225.869	195.458	250.518	233.515	207.356	402.068	158.947	191.636	236.902	224.86	0	0	340.004	232.423	262.294	196.626	308.35	162.973	287.652	230.28	193.118	208.266	116.434	58.6363	234.325	313.055	157.45	220.489	151.757	201.535	153.446	216.402	186.917	203.12	291.72
Cul4a	0	0	174.167	0	134.404	261.438	220.459	260.2	80.2323	123.878	77.5919	78.691	31.2947	0	57.9608	58.3336	71.722	77.3026	39.0654	18.6333	162.063	0	138.5	155.019	0	0	99.672	99.0244	52.1521	74.8297	85.748	33.6919	61.6198	50.1986	81.1223	94.4056	105.62	58.0408	267.473	170.679	240.83	192.529	36.2622	42.6392	68.951	45.685	44.986	152.133	0
Cul4b	0	0	0	0	171.44	281.269	0	41.3737	285.471	265.367	276.168	213.802	81.8722	63.5143	202.121	223.381	206.692	202.318	238.156	459.148	436.27	508.332	30.0051	112.045	0	235.521	214.653	212.204	163.74	123.583	362.968	338.784	138.993	225.283	0	11.6078	225.024	215.396	0	0	96.5262	78.082	283.823	232.306	150.029	294.152	212.056	137.459	41.9148
Cul5	0	0	214.09	0	214.591	133.107	118.67	0	82.5464	87.3223	108.497	137.06	115.76	135.708	86.6219	106.617	173.381	140.977	109.08	59.218	99.576	161.034	99.4886	142.704	0	0	83.7978	79.6367	125.265	141.575	162.323	56.1692	124.197	140.786	29.4624	7.5842	0	73.8934	0	0	88.3289	88.3012	194.823	177.913	141.995	155.967	118.577	90.6645	147.664
Cul7	0	643.851	0	0	182.409	212.187	0	0	0	333.275	42.9254	70.9639	0	0	0	0	0	49.7388	0	0	78.6907	0	0	16.5376	0	0	0	0	0	0	0	0	0	0	0	0	0	0	0	0	0	0	0	0	0	0	0	0	0
Cul9	0	0	0	0	0	0	0	0	0	0	0	0	0	0	0	0	0	0	0	0	0	0	0	0	0	0	0	0	0	0	0	235.897	0	0	0	0	0	0	0	0	0	0	0	0	0	0	23.5072	0	0
Cuta	164.907	96.376	57.5281	83.6593	105.931	62.4908	39.9634	39.9242	66.1728	84.5302	115.985	82.3872	78.0554	79.8343	75.1871	73.5297	93.5199	58.7749	153.044	150.192	0	0	79.5328	53.2852	59.9012	0	60.4907	55.5708	85.806	130.815	49.6522	122.686	34.3792	100.564	58.7566	58.487	55.3589	75.8641	109.453	72.1428	40.8632	55.9367	86.2433	128.302	127.426	92.3499	87.4981	46.2713	83.6761
Cutc	195.094	284.676	310.123	267.991	164.641	163.718	88.2648	58.3525	188.598	167.976	58.5476	96.9164	92.2619	138.247	87.947	78.1952	137.427	182.298	119.277	157.466	86.034	68.427	102.613	104.858	0	0	82.9821	82.6418	35.3913	70.7305	28.691	71.1735	87.7118	102.218	33.6675	64.3537	0	0	0	0	74.8268	19.6547	56.8719	11.8173	51.567	58.9792	25.6794	62.8595	121.785
Cux1	0	0	0	0	111.174	0	472.361	265.933	288.345	269.511	346.879	288.7	239.038	210.771	255.975	296.818	287.992	258.501	320.161	336.74	403.318	402.767	305.65	344.951	533.328	764.612	511.467	403.272	695.163	554.114	362.133	495.905	339.504	442.779	332.524	450.766	118.874	891.255	383.886	132.64	152.042	200.603	349.63	229.601	242.095	151.393	228.428	201.65	0
Cwc15	102.026	0	0	0	58.3899	0	62.8937	79.6092	111.061	52.6578	43.0302	77.1909	44.8811	12.1069	100.211	35.612	27.5899	76.5975	0	57.6288	98.9719	133.77	43.4141	70.32	0	60.427	36.4479	41.2689	29.085	0	77.2254	0	0	7.02563	90.2674	64.2445	34.7478	50.7076	0	0	62.3229	63.7757	0	0	0	102	0	30.3887	0
Cwc22	0	0	0	0	0	0	0	0	0	0	20.6773	44.1319	0	0	34.2769	34.9656	0	7.7155	0	0	39.6772	107.606	113.809	55.9615	0	0	0	0	0	0	64.8462	0	50.4816	64.0704	58.7414	37.7654	0	0	0	0	36.7587	140.44	0	0	0	0	219.105	52.8294	0
Cwc25	0	0	0	0	0	0	0	0	0	0	0	0	2.67104	0	63.0185	78.2322	10.7484	0	0	56.765	51.23	27.4648	0	0	71.897	0	11.5752	0	0	0	67.0519	0	0	0	0	0	0	0	0	0	44.2712	0	0	0	0	55.4467	0	0	0
Cwc27	212.489	101.795	224.87	0	102.112	226.931	88.1252	74.1045	177.808	113.14	81.6525	37.7127	190.242	122.016	97.0733	177.994	125.351	143.502	199.93	43.2574	96.2707	150.693	98.2191	138.411	38.7475	156.651	160.691	92.0479	172.715	169.069	85.3937	219.922	95.9696	175.186	101.503	133.399	98.1738	69.7044	192.108	142.212	126.142	81.7103	249.037	184.94	135.731	175.17	168.428	175.768	170.223
Cwf19l1	0	75.0893	83.0281	0	130.085	21.8572	62.9186	112.575	97.1544	141.362	63.3507	75.4696	32.603	73.5281	46.6056	62.1454	89.711	54.9491	88.0838	32.5669	82.261	211.453	46.4679	66.4387	0	0	68.0944	132.548	63.5869	151.567	91.7687	150.48	114.039	64.4803	34.5488	68.2838	121.803	37.7973	143.127	161.809	85.0551	88.9256	71.0954	121.628	109.526	56.9651	205.632	68.4487	124.826
Cwf19l2	0	0	0	0	33.3678	0	87.7875	0	0	0	0	40.0944	25.7128	0	51.8111	97.4194	11.6267	51.9435	0	0	155.361	67.3561	0	60.251	0	0	0	0	0	0	113.032	93.2301	0	141.173	30.1576	0	143.302	188.196	0	0	68.4329	0	0	0	0	0	0	38.0625	0
Cx3cl1	0	0	0	96.8585	113.339	0	0	0	0	0	0	0	0	0	0	0	0	0	0	21.4529	0	0	0	0	0	0	0	0	0	38.1023	0	0	0	0	0	0	0	0	0	0	0	0	0	0	0	0	0	0	0
Cxxc1	0	0	0	0	0	0	0	79.8606	0	0	136.806	92.5375	26.7061	23.4929	100.455	131.183	179.14	144.639	152.801	149.442	0	133.19	95.8994	130.191	0	32.0894	126.754	27.368	0	42.9655	144.096	196.125	54.293	75.5779	71.9249	79.4446	112.199	81.8812	0	0	87.7624	121.924	57.9974	127.297	130.877	67.9456	45.5121	141.276	0
Cxxc5	0	0	0	0	0	0	0	0	0	0	0	0	0	0	0	54.8646	0	0	0	0	20.8684	27.9623	0	4.49075	0	0	0	0	0	0	42.0604	0	0	0	0	0	0	0	0	0	0	0	0	0	0	0	0	0	0
Cyb561d2	0	0	0	0	0	0	0	0	0	0	0	0	5.70455	0	0	0	0	0	0	8.59055	0	10.6627	0	0	0	0	0	0	0	0	0	0	0	0	0	0	0	0	0	0	1.88322	0	0	0	7.60005	0	0	4.58135	0
Cyb5a	517.746	415.137	294.215	771.96	549.985	441.986	368.809	410.614	424.004	414.878	276.708	230.007	231.276	134.359	274.762	265.236	171.081	243.358	253.206	212.225	269.598	245.07	221.641	215.668	270.991	275.267	78.4074	105.053	32.3659	62.0188	204.241	180.472	210.921	152.777	216.123	179.342	353.532	356.654	434.243	453.411	143.284	271.178	183.262	88.2176	87.5151	141.161	183.017	100.799	302.717
Cyb5b	303.781	226.455	454.392	0	114.331	125.112	242.15	204.817	84.6292	0	200.266	278.598	50.4766	48.2003	127.932	70.7393	87.4817	114.762	49.2602	251.614	85.7062	132.857	140.69	226.086	174.048	216.881	113.46	128.864	80.5656	195.396	97.3737	106.285	268.998	54.0729	194.098	176.917	53.6788	43.7846	385.216	208.235	111.117	133.198	0	142.649	116.094	99.8702	116.183	103.372	226.587
Cyb5r1	0	0	0	0	131.196	80.9347	0	0	0	0	65.1901	68.4004	16.1888	0	13.824	0	38.8426	36.7003	0	0	0	0	0	25.434	0	0	0	0	0	0	0	0	0	0	0	0	0	0	0	0	0	17.8593	0	0	0	23.4159	0	25.1028	0
Cyb5r3	792.079	115.002	63.3071	0	202.233	92.5041	143.883	203.82	134.591	80.0739	177.967	187.694	120.342	36.0723	154.097	198.084	164.962	90.5239	50.9335	199.036	161.543	140.904	142.112	123.233	0	39.837	45.7396	21.4888	92.2822	100.481	168.587	118.597	88.7424	164.973	82.4456	78.6772	172.87	149.804	76.6588	39.0961	143.123	116.23	113.588	88.085	70.0362	83.9793	56.9756	85.9704	83.194
Cyb5r4	0	0	0	0	0	0	0	0	0	0	0	17.4321	10.6622	0	0	0	25.1575	28.8339	0	0	39.3279	48.5371	23.6228	0	0	0	0	0	0	0	0	0	0	57.642	0	0	0	0	0	0	0	0	0	0	72.2823	0	61.06	65.864	0
Cybb	0	0	0	0	0	0	0	0	0	0	0	18.6418	0	0	0	0	0	0	0	0	0	34.084	0	0	0	0	0	0	0	0	0	0	0	0	0	0	0	0	0	0	0	0	0	0	0	0	45.4591	51.5518	0
Cyc1	140.517	187.538	297.831	138.354	167.623	185.156	244.786	223.748	134.496	195.496	160.553	184.541	286.056	189.558	140.472	190.195	175.779	173.964	233.353	273.039	70.921	94.8128	199.697	231.791	225.702	223.907	238.808	175.003	260.699	284.079	238.775	475.802	202.67	335.485	213.495	231.801	285.216	415.183	304.239	428.592	212.469	199.939	382.04	314.84	580.974	228.585	299.042	285.309	338.585
Cycs	57.0836	157.602	145.207	261.687	40.1207	25.0167	71.634	131.273	91.9519	107.274	112.252	74.4174	83.3298	130.664	105.741	67.6663	50.2489	49.7265	103.586	143.198	121.011	0	105.401	107.893	212.677	128.46	139.076	83.6153	93.0841	140.785	83.4965	106.055	142.65	57.4578	102.406	68.6438	43.0865	132.751	882.996	144.829	97.0243	147.072	91.102	139.886	135.184	70.3536	179.556	195.777	113.937
Cyfip1	0	0	0	0	213.493	373.854	74.0913	107.786	120.226	153.061	134.134	428.278	62.5921	62.1818	79.118	79.6891	134.271	118.222	0	123.725	146.687	63.1229	397.701	106.731	0	0	135.984	94.2775	84.6266	89.8743	141.408	64.3334	87.4657	76.4206	174.791	100.296	212.343	0	0	89.5562	196.013	155.359	44.1876	95.9152	88.2635	76.4222	131.468	477.936	196.931
Cyfip2	199.553	647.984	200.101	102.397	494.229	120.255	369.886	494.488	358.371	338.925	354.116	126.182	174.616	139.955	280.824	238.198	322.175	406.562	524.534	618.021	530.259	500.576	142.093	383.218	293.357	279.412	610.457	513.247	594.393	534.857	461.6	204.792	608.106	358.433	38.0296	230.261	216.044	105.926	0	0	50.1362	13.7757	295.431	223.24	339.422	259.139	156.697	74.8286	798.506
Cyhr1	0	0	0	0	0	0	0	0	0	0	0	0	0	0	22.3072	29.9071	0	21.037	0	0	68.5518	0	8.95708	22.6318	0	0	0	0	0	0	45.9215	7.99188	11.7871	0	0	0	0	0	0	0	0	0	0	0	15.1604	36.3722	11.4892	0	0
Cyld	0	0	0	0	0	0	0	0	0	0	0	0	0	0	0	0	0	100.487	0	0	84.9606	0	0	0	0	0	100.052	95.2194	0	0	0	0	0	0	0	0	0	0	0	0	0	0	0	0	0	0	0	0	0
Cyp20a1	0	0	0	0	83.5671	0	58.2634	0	54.8294	49.2262	32.2415	31.275	12.7785	10.028	32.3641	44.6938	41.1613	47.7872	30.8213	17.3801	24.3242	78.4511	32.6704	44.4936	0	0	0	0	0	0	23.4155	31.2134	0	22.7901	54.0796	40.9606	92.2408	65.0979	0	0	30.2711	50.2148	102.115	61.7647	39.3199	35.0587	94.1786	78.46	0
Cyp2w1	0	0	0	0	0	0	0	0	0	0	0	0	0	0	0	0	0	0	0	21.8248	0	0	0	0	0	0	0	0	0	0	0	0	0	0	0	0	0	0	0	0	0	0	0	0	0	0	0	0	0
Cyp4a31	0	0	0	0	0	0	0	0	0	0	0	0	0	0	0	0	0	0	0	0	0	0	0	0	0	0	0	0	0	0	0	0	0	0	0	0	0	0	0	0	0	0	0	0	22.459	0	0	0	0
Cyp4f16	0	0	0	0	0	0	0	0	0	0	18.8508	0	0	0	0	0	9.15504	0	0	0	0	0	0	0	0	0	0	0	0	0	0	0	0	0	0	0	0	0	0	0	0	0	0	0	0	9.07838	40.9514	14.4546	0
Cyp4f17	0	0	0	0	0	0	0	0	0	0	0	16.9172	0	0	0	0	0	0	0	0	0	47.1286	0	0	0	0	0	0	0	0	0	0	0	0	0	0	0	0	0	0	0	0	0	0	46.4156	0	0	0	0
Cyp51	0	0	0	0	0	0	0	0	0	0	0	0	0	0	0	0	0	0	0	0	0	74.5837	0	0	0	0	0	0	0	0	0	9.64363	56.7252	0	0	0	0	0	0	0	0	0	25.9098	83.3343	93.1357	50.4086	89.0997	36.031	0
Cyth1	0	0	0	0	0	0	0	0	0	0	17.4634	0	59.1194	0	69.8559	51.5019	45.6972	43.9119	0	0	25.7486	79.0178	52.5127	29.8205	10.3701	134.183	132.359	156.407	101.833	34.2875	25.0828	0	0	0	0	30.9303	0	0	0	0	0	0	0	94.8932	68.6724	59.6026	0	127.478	0
Cyth2	0	0	0	0	0	0	0	0	0	0	0	0	0	0	0	0	0	0	0	0	38.1801	5.69313	7.43097	0	0	0	0	0	0	0	0	0	0	0	0	0	0	0	0	0	0	0	0	0	0	0	0	0	0
Cyth3	0	0	0	0	0	0	0	0	0	0	0	71.3387	0	0	0	0	0	0	0	0	0	0	0	0	0	0	0	0	0	0	0	48.1289	0	0	0	0	0	0	0	0	19.699	26.41	0	0	0	0	0	0	0
Cyth4	0	0	0	0	0	0	0	0	0	65.0435	0	10.7611	0	0	29.0959	51.4619	14.8222	14.5333	0	0	107.212	94.4812	128.315	64.3051	0	0	12.4135	18.2018	52.4941	51.5508	29.0309	0	124.264	0	0	0	0	0	0	0	0	0	0	0	83.0985	49.0174	25.7802	46.9628	0
D10Jhu81e	565.504	136.369	258.059	479.529	427.005	325.686	137.521	250.813	212.563	373.601	542.649	525.746	191.274	114.579	420.804	500.472	467.457	437.851	322.149	209.467	408.154	604.116	451.658	397.787	163.506	112.001	239.58	216.979	197.859	271.013	178.575	151.29	161.314	120.473	477.195	421.58	198.729	147.647	140.524	194.869	382.312	360.395	127.592	182.709	157.873	216.078	66.7174	236.074	406.814
D10Wsu102e	0	0	0	0	0	0	0	0	0	0	0	0	0	0	62.159	0	0	0	0	0	12.8907	0	0	0	0	0	0	0	0	0	0	0	0	0	0	0	0	0	0	0	0	0	0	0	0	0	0	0	0
D16Ertd472e	0	0	0	0	0	0	0	0	0	0	0	0	0	0	29.6063	21.1175	0	40.5546	0	0	23.6426	40.4368	47.9958	3.01554	0	0	0	0	0	0	12.261	0	0	0	0	0	0	0	0	0	0	0	0	0	0	5.01591	0	33.0632	0
D17H6S56E-5	0	0	0	0	0	0	0	0	0	0	0	0	12.1915	0	90.7434	118.542	45.6486	44.8019	32.1578	0	0	0	41.0898	51.8489	0	0	97.4159	0	0	0	0	28.6916	0	49.7313	96.8109	57.0952	0	0	0	0	54.6701	83.0933	0	24.8115	53.5255	38.1481	0	52.0476	0
D17Wsu92e	0	0	0	0	0	0	0	0	0	0	0	0	11.0385	0	0	0	0	0	0	0	0	0	4.37846	0	0	0	0	0	0	0	0	100.549	0	0	0	0	6.99302	0	0	0	4.42606	3.67312	0	0	0	0	0	0	0
D1Pas1	0	0	0	347.572	0	0	0	360.97	0	0	0	0	0	0	0	0	0	0	0	0	0	0	0	0	0	0	0	0	0	0	0	0	0	0	0	0	0	0	0	0	0	0	0	0	0	0	0	0	0
D230025D16Rik	0	0	0	0	0	0	0	0	0	0	0	0	0	0	0	0	0	0	0	0	0	0	0	0	0	0	4.64283	0	0	0	57.3938	0	0	0	0	0	0	0	0	0	0	0	41.5591	0	0	18.9096	0	0	0
D2hgdh	0	0	0	0	0	0	0	0	0	0	0	0	0	0	0	0	0	0	0	0	0	0	0	0	0	0	0	0	0	0	0	0	0	0	0	0	0	0	0	0	0	0	0	0	0	0	0	0	0
D3Ertd751e	0	0	0	0	103.06	29.7193	0	0	0	0	0	0	0	0	0	0	0	0	0	0	0	0	0	0	0	0	0	0	0	0	0	0	0	0	0	0	0	0	0	0	0	0	0	0	0	0	0	0	0
D430041D05Rik	0	0	0	0	0	0	0	0	0	0	0	0	0	0	0	0	0	0	0	0	0	0	0	0	0	0	0	0	0	0	0	0	0	0	0	0	0	0	0	0	0	0	67.1738	0	0	0	0	0	0
D430042O09Rik	0	0	0	0	0	0	0	0	0	0	0	0	0	0	0	0	0	57.1739	0	0	0	0	42.6835	66.6444	0	0	0	0	0	0	0	0	0	0	0	0	0	0	0	0	0	0	0	0	0	0	0	0	0
D6Wsu163e	0	0	0	0	0	0	0	0	0	0	0	0	0	0	0	0	0	0	0	0	53.6115	71.1371	0	0	0	0	0	0	0	0	0	0	0	0	0	6.44365	0	0	0	0	0	0	0	0	0	31.632	0	18.8121	0
D830044I16Rik	0	0	0	0	0	0	0	0	0	0	0	0	2785.3	0	0	0	0	0	0	0	0	0	0	0	0	0	0	0	0	0	0	0	0	0	0	0	0	0	0	0	0	0	0	0	0	0	0	0	0
D930020B18Rik	0	0	0	0	0	0	0	0	0	0	0	0	0	0	0	0	0	0	0	0	0	0	0	0	0	0	0	0	0	0	0	0	0	0	0	0	0	0	0	0	0	0	0	0	0	0	0	0	0
Dab2ip	0	0	0	0	0	0	0	0	0	0	0	0	0	0	64.0243	51.2498	0	0	0	0	227.005	77.3187	0	0	0	0	0	0	0	0	41.6976	0	30.9164	0	0	0	0	0	0	0	0	0	0	0	0	0	0	0	0
Dach1	25.6287	70.7827	224.035	128.056	53.4246	35.0478	131.401	425.375	108.223	106.161	59.1885	45.7217	23.2194	39.2245	67.6006	90.9688	41.8014	36.7882	0	0	0	0	0	0	0	0	0	0	0	0	197.214	67.5459	126.762	108.176	62.7849	69.3062	202.6	177.886	37.2996	195.236	44.4756	68.1276	25.6792	88.009	36.9045	39.3642	22.9174	0	81.9266
Dach2	0	0	0	0	0	0	0	0	0	0	0	0	0	0	0	0	0	0	0	0	0	0	0	0	0	0	0	0	0	0	0	0	0	0	0	0	0	0	0	0	0	0	0	0	9.21647	0	0	0	0
Dad1	28.5733	73.3657	76.5775	87.0733	28.8597	80.7233	54.1369	54.5045	94.6207	68.5052	17.9802	70.3727	80.1914	18.1528	78.1458	17.1675	12.714	62.2385	59.1627	25.1587	0	41.0967	48.2961	9.67259	137.368	31.1089	68.521	38.8385	58.3466	47.9625	46.7599	40.8245	42.8927	56.3993	94.0399	104.612	66.2361	82.327	54.3191	56.5365	36.1629	67.6733	167.992	29.9195	62.8073	62.1423	56.1851	86.5495	63.5577
Dag1	41.5208	0	0	0	36.9348	0	0	0	0	0	0	0	0	0	0	0	0	0	0	0	53.522	0	0	0	0	0	0	0	0	0	0	0	157.04	45.4607	0	0	0	0	0	0	0	0	0	0	0	0	0	0	0
Daglb	0	0	0	0	0	0	0	0	0	0	0	0	25.9963	0	0	0	0	0	40.9815	0	0	0	0	0	0	0	0	0	0	0	0	26.5012	0	0	0	0	0	0	0	0	0	0	39.8332	0	0	0	45.9154	42.8858	0
Dap	122.751	0	0	0	17.6932	54.8902	39.6905	0	116.813	169.49	68.3124	59.4973	81.5543	96.2982	65.6629	115.279	77.4417	90.3331	119.592	40.2311	119.325	117.172	140.595	71.0359	275.021	230.962	51.3747	17.2741	6.67428	57.0278	73.8861	0	178.018	36.1978	33.8064	25.4862	38.6818	0	0	13.5564	33.6857	51.6043	55.5806	28.7784	51.5716	20.9865	143.593	85.0607	0
[truncated: 6,259 more rows]
[truncated: 17 more columns]

## Sheet: Table 2 Combined
	HSC	MPPa	MPPb	MPPc	OldHSC	OldMPPa	OldMPPb	OldMPPc	CLP	CMP	MEP	GMP
2020-03-02	107.553	138.572	91.9921	195.634	126.31	114.132	154.429	98.1293	92.8738	117.32	107.504	98.4421
[truncated: 7,916 more rows]

## Sheet: Table 3 PCA Adult
PC1 Adult				PC2 Adult
[truncated: 7,719 more rows]

## Sheet: Table 4 Unique Proteins
All Cells	-HSC	HSC	MPPa	MPPb	MPPc	CLP	CMP	MEP	GMP	HSC+MPP
[truncated: 3,132 more rows]

[truncated: 6 more sheets: Table 5 Cabezas-Wallscheid Comp, Table 6 PCA Old+Adult, Table 7 Old vs Adult High, Table 8 RNA-seq, Table 9 mRNA vs Protein, Table 10 miRNA]
